# Supplementary material for: Diversity-oriented chiral phosphoric acid catalyzed alkylation of indolizines with aminals
Source: Royal Society of Chemistry journal article supplement (doi:10.1039/d4qo01543f), 2024-01-01
Supplement: d4qo01543f1.pdf [file d4qo01543f1.pdf]

## Supporting information

# Diversity-Oriented Chiral Phosphoric Acid Catalyzed Alkylation of Indolizines with Aminals

Ahmad F. Kassir,<sup>a</sup> Nazar Rad,<sup>a</sup> Patryk Klochowicz,<sup>a</sup> Jarosław M. Granda<sup>\*a</sup>

<sup>a</sup>*Institute of Organic Chemistry, Polish Academy of Sciences,  
Kasprzaka 44/52, 01-224 Warsaw, Poland. E-mail: jaroslaw.granda@icho.edu.pl.*

## Table of contents

|                                                                                                                                                                                  |    |
|----------------------------------------------------------------------------------------------------------------------------------------------------------------------------------|----|
| 1. General information .....                                                                                                                                                     | 3  |
| 2. Optimization of reaction conditions .....                                                                                                                                     | 4  |
| <b>Table S1.</b> Screening of catalysts for reaction between indolizine <b>1a</b> and <i>N</i> -Boc aminal <b>2a</b> .....                                                       | 4  |
| <b>Table S2.</b> Screening of solvents for reaction between indolizine <b>1a</b> and <i>N</i> -Boc aminal <b>2a</b> using <b>B5</b> catalyst <sup>a</sup> .....                  | 5  |
| <b>Table S3.</b> Screening of additives for reaction between indolizine <b>1a</b> and <i>N</i> -Boc aminal <b>2a</b> using <b>B5</b> catalyst <sup>a</sup> .....                 | 6  |
| <b>Table S4.</b> Optimization of catalyst concentration for reaction between indolizine <b>1a</b> and <i>N</i> -Boc aminal <b>2a</b> using <b>B5</b> catalyst <sup>a</sup> ..... | 7  |
| <b>Table S5.</b> Optimization of <b>2a</b> equivalents for reaction between indolizine <b>1a</b> and <i>N</i> -Boc aminal <b>2a</b> using <b>B5</b> catalyst <sup>a</sup> .....  | 7  |
| <b>Table S6.</b> Optimization of concentration of reaction between indolizine <b>1a</b> and <i>N</i> -Boc aminal <b>2a</b> using <b>B5</b> catalyst .....                        | 8  |
| <b>Table S7.</b> Optimization of temperature of reaction between indolizine <b>1a</b> and <i>N</i> -Boc aminal <b>2a</b> using <b>B5</b> catalyst .....                          | 8  |
| <b>Table S8.</b> Optimization of excess of <b>2a</b> equivalents for reaction between indolizine <b>1a</b> and <i>N</i> -Boc aminal <b>2a</b> using <b>B5</b> catalyst .....     | 9  |
| <b>Table S9.</b> Screening of solvents for reaction between <b>1a</b> and <b>2a</b> <sup>a</sup> using <b>S2</b> catalyst .....                                                  | 9  |
| <b>Table S10.</b> Optimization of <b>2a</b> equivalents for reaction between indolizine <b>1a</b> and <i>N</i> -Boc aminal <b>2a</b> <sup>a</sup> using <b>S2</b> catalyst ..... | 10 |
| <b>Table S11.</b> Screening of additives for reaction between indolizine <b>1a</b> and <i>N</i> -Boc aminal <b>2a</b> using <b>S2</b> catalyst .....                             | 11 |
| <b>Table S12.</b> Preliminary screening of catalysts for reaction between indolizine <b>1a</b> and <i>N</i> -Boc aminal <b>5a</b> <sup>a</sup> .....                             | 12 |
| <b>Table S13.</b> Screening of solvents for reaction between indolizine <b>1a</b> and <i>N</i> -Cbz aminal <b>5a</b> .....                                                       | 14 |
| <b>Table S14.</b> Optimization of catalyst concentration for reaction between indolizine <b>1a</b> and <i>N</i> -Cbz aminal <b>5a</b> .....                                      | 15 |
| <b>Table S15.</b> Screening of additives for reaction between indolizine <b>1a</b> and <i>N</i> -Cbz aminal <b>5a</b> .....                                                      | 15 |
| <b>Table S16.</b> Relation between overall e.e. of catalyst <b>B5</b> and e.e. of product <b>3a</b> .....                                                                        | 16 |

|                                                                                                                                                                                                                                    |     |
|------------------------------------------------------------------------------------------------------------------------------------------------------------------------------------------------------------------------------------|-----|
| <b>Table S17.</b> Relation between overall e.e. of catalyst <b>B1</b> and e.e. of product <b>7a</b> .....                                                                                                                          | 16  |
| 3. Asymmetric synthesis of chiral regioisomers.....                                                                                                                                                                                | 18  |
| 3.1. General procedure <b>A</b> .....                                                                                                                                                                                              | 18  |
| 3.3. Procedure <b>B</b> .....                                                                                                                                                                                                      | 18  |
| 3.4. General procedure <b>C</b> .....                                                                                                                                                                                              | 18  |
| 3.5. Procedure <b>D</b> .....                                                                                                                                                                                                      | 19  |
| 3.6. Procedure <b>E</b> .....                                                                                                                                                                                                      | 19  |
| 3.7. Products with Boc-protecting group <b>3a-s</b> , <b>4a-s</b> and <b>10</b> .....                                                                                                                                              | 19  |
| 3.8. Products with Cbz-protecting group <b>6a-m</b> , <b>7a-m</b> , <b>8</b> and <b>9</b> .....                                                                                                                                    | 43  |
| 4. Synthesis of N-Boc amins .....                                                                                                                                                                                                  | 55  |
| 4.1. General procedure <b>F</b> for synthesis of N-Boc amins.....                                                                                                                                                                  | 55  |
| 4.2. General procedure <b>G</b> for synthesis of N-Cbz amins .....                                                                                                                                                                 | 55  |
| 4.3. N-Boc amins .....                                                                                                                                                                                                             | 55  |
| 4.4. N-Cbz amins .....                                                                                                                                                                                                             | 62  |
| 5. Synthesis of indolizines.....                                                                                                                                                                                                   | 68  |
| 6. <sup>1</sup> H, <sup>13</sup> C and <sup>19</sup> F NMR Spectra .....                                                                                                                                                           | 71  |
| 6.1. Products with Boc-protecting group <b>3a-s</b> , <b>4a-s</b> and <b>10</b> .....                                                                                                                                              | 71  |
| 6.2. Products with Cbz-protecting group <b>6a-m</b> , <b>7a-m</b> , <b>8</b> and <b>9</b> .....                                                                                                                                    | 119 |
| 6.3. N-Boc amins <b>2a-m</b> .....                                                                                                                                                                                                 | 141 |
| 6.4. N-Cbz amins <b>5a-k</b> .....                                                                                                                                                                                                 | 156 |
| 6.5. Indolizines <b>1a-d</b> .....                                                                                                                                                                                                 | 170 |
| 6.6. All NMR spectra of compounds <b>3a</b> and <b>4a</b> .....                                                                                                                                                                    | 175 |
| 8. HPLC Chiral spectra .....                                                                                                                                                                                                       | 191 |
| 8.1. Products with Boc-protecting group <b>3a-s</b> , <b>4a-s</b> and <b>10</b> .....                                                                                                                                              | 191 |
| 8.2. Cbz-protected products <b>6a-m</b> , <b>7a-m</b> , <b>8</b> and <b>9</b> .....                                                                                                                                                | 231 |
| 9. Absolute configuration assignment for compounds <b>3a</b> , <b>4a</b> , <b>6a</b> , <b>7a</b> using circular dichroism .....                                                                                                    | 248 |
| <b>Table S18.</b> Energies and Gibbs free energies (in Hartrees) calculated for conformers of ( <i>R</i> )- <b>3a</b><br>calculated at B3LYP-D3(BJ)/def2svp/CPCM (acetonitrile) and their Boltzmann distribution factors.<br>..... | 250 |
| <b>Table S19.</b> Energies and Gibbs free energies (in Hartrees) calculated for conformers of ( <i>R</i> )- <b>4a</b><br>calculated at B3LYP-D3(BJ)/def2svp/CPCM (acetonitrile) and their Boltzmann distribution factors.<br>..... | 250 |
| <b>Table S20.</b> Energies and Gibbs free energies (in Hartrees) calculated for conformers of ( <i>R</i> )- <b>6a</b><br>calculated at B3LYP-D3(BJ)/def2svp/CPCM (acetonitrile) and their Boltzmann distribution factors.<br>..... | 251 |
| <b>Table S21.</b> Energies and Gibbs free energies (in Hartrees) calculated for conformers of ( <i>R</i> )- <b>7a</b><br>calculated at B3LYP-D3(BJ)/def2svp/CPCM (acetonitrile) and their Boltzmann distribution factors.<br>..... | 251 |
| 10. Computational investigation of indolizine alkylation selectivity .....                                                                                                                                                         | 252 |
| <b>Table S22.</b> Pearson correlation coefficient for different location of % buried volume descriptor. ....                                                                                                                       | 252 |

|                                                                                                                    |     |
|--------------------------------------------------------------------------------------------------------------------|-----|
| <b>Table S23.</b> Comparison of Pearson correlation coefficients for <i>N</i> -Boc and <i>N</i> -Cbz aminals. .... | 253 |
| 11. References .....                                                                                               | 254 |

## 1. General information

All reagents were purchased from Sigma-Aldrich, Ambeed and Fluorochem, and used without further purification. All solvents were of reagent grade quality and were dried over MS 3 Å before use. Some of BINOL-based chiral phosphoric acid catalysts were purchased from Ambeed, and others were synthesized according to the literature procedure.<sup>1-5</sup> *H*8-BINOL-derived chiral phosphoric acid catalysts were all synthesized according to the literature procedure.<sup>5-9</sup> SPINOL-derived chiral phosphoric acid catalysts were also synthesized according to the literature procedure.<sup>10-13</sup> Solvents were dried with MS 3 Å.

The <sup>1</sup>H, <sup>13</sup>C and <sup>19</sup>F NMR spectra were recorded on Varian Gemini 200, Bruker Avance III HD 400, Bruker model DRX Avance 500, Varian-Agilent 500 model and Varian-Agilent 600. Chemical shifts are reported in ppm. The splitting pattern of multiplets is described by abbreviations (s – singlet, bs – broad singlet, d – doublet, t – triplet, q – quartet, dd – doublet of doublets, ddd – doublet of doublet of doublets, m – complex multiplicity). Coupling constants values (*J*) are reported in Hz. Column chromatography was performed with Merck Kieselgel 60 (230-400 mesh). TLC was carried out on Merck Kieselgel F254 plates. Melting points were determined using a Boëtius M HMK hot-stage apparatus and were uncorrected. High resolution Mass spectrometry analysis was performed using Synapt G2-S mass spectrometer (Waters) equipped with the electrospray (ESI) ion source and quadrupole-Time-of-flight (qTOF) mass analyzer. Acetonitrile (Honeywell, LC-MS Chromasolv™, purity ≥ 99.9%) was used as a solvent and mobile phase with the flow rate 100 µl/min. Sample was dissolved and injected directly into the ESI source. Injection volume was 1 µl depending on concentration. The measurement was performed in the positive ion mode with the resolving power of TOF analyzer 30000 FWHM. The lock-spray spectrum of Leucine-enkephalin was generated by the lock-spray source and the correction was performed for the recorded spectrum. The exact mass measurement was performed within 3 mDa mass error. Nitrogen was used as desolvation and cone gas, and their flow values were set to 600 L/h and 100 L/h respectively. Desolvation gas temperature was set to 350°C. Nebulizer gas pressure was set to 5.0 bar. Capillary voltage was set to 3.0 kV, and sampling cone voltage and source offset were set to 30-50 V. The instrument was controlled and data were processed using the MassLynx V4.1 software package (Waters). Optical Rotations were measured in DCM on Jasco P-2000 digital polarimeter using a sodium lamp (λ 589 nm, D-line). [α]<sub>D</sub> values are reported at 25 °C in 10<sup>-1</sup> degrees cm<sup>2</sup>·g<sup>-1</sup> with concentration in g·100cm<sup>-3</sup>. HPLC analyses for the determination of enantiomeric excesses were performed on a Hitachi Elite LaChrom HPLC

System With L-2400 UV detector, L-2200 Autosampler and L-2130 pump, equipped with Chiralpak AD-H column (5  $\mu$ m, 4.6 x 250 mm), Chiralpak IC column (5  $\mu$ m, 4.6 x 250 mm), Chiralcel OD-H column (5  $\mu$ m, 4.6 x 250 mm). ECD values were measured on Jasco J-815 EDC Spectropolarimeter.

## 2. Optimization of reaction conditions

**Table S1.** Screening of catalysts for reaction between indolizine **1a** and *N*-Boc aminal **2a**<sup>a</sup>

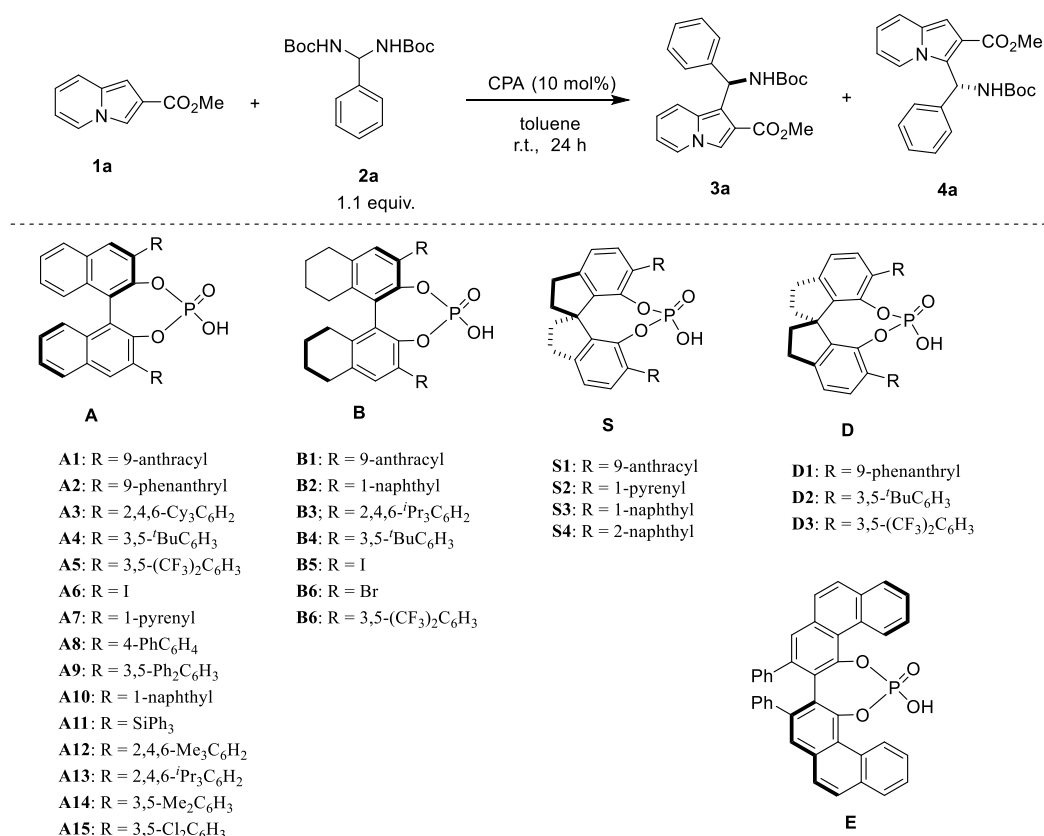

| Entry | CPA                                                                 | Conversion (%) <sup>b</sup> | <b>3a</b> e.e. (%) <sup>c</sup> | <b>4a</b> e.e. (%) <sup>c</sup> | Ratio <b>4a:3a</b> |
|-------|---------------------------------------------------------------------|-----------------------------|---------------------------------|---------------------------------|--------------------|
| 1     | <b>A1</b> , ( <i>R</i> )-9-anthracenyl                              | 66                          | 19                              | 8                               | 1:1                |
| 2     | <b>A2</b> , ( <i>R</i> )-9-phenanthryl                              | 66                          | 36                              | 5                               | 1.1:1              |
| 3     | <b>A3</b> , ( <i>R</i> )-2,4,6- $\text{Cy}_3\text{C}_6\text{H}_2$   | 66                          | 65                              | 54                              | 6.5:1              |
| 4     | <b>A4</b> , ( <i>R</i> )-3,5- $\text{tBuC}_6\text{H}_3$             | 64                          | 12                              | -18                             | 5.4:1              |
| 5     | <b>A5</b> , ( <i>R</i> )-3,5- $(\text{CF}_3)_2\text{C}_6\text{H}_3$ | 94                          | 13                              | -37                             | 7.5:1              |
| 6     | <b>A6</b> , ( <i>R</i> )-I                                          | 76                          | 57                              | -1                              | 1:1.4              |
| 7     | <b>A7</b> , ( <i>R</i> )-1-pyrenyl                                  | 73                          | 5                               | 13                              | 1:1.1              |
| 8     | <b>A8</b> , ( <i>R</i> )-4- $\text{PhC}_6\text{H}_4$                | 78                          | 9                               | -11                             | 1:1.1              |
| 9     | <b>A9</b> , ( <i>R</i> )-3,5- $\text{Ph}_2\text{C}_6\text{H}_3$     | 85                          | 1                               | -3                              | 4:1                |
| 10    | <b>A10</b> , ( <i>R</i> )-1-naphthyl                                | 83                          | 3                               | 1                               | 1:1.2              |
| 11    | <b>A11</b> , ( <i>R</i> )- $\text{SiPh}_3$                          | 84                          | 7                               | -12                             | 1.3:1              |



|    |                                                                                            |    |     |     |       |
|----|--------------------------------------------------------------------------------------------|----|-----|-----|-------|
| 12 | <b>A12</b> , ( <i>R</i> )-2,4,6-Me <sub>3</sub> C <sub>6</sub> H <sub>2</sub>              | 79 | 17  | 40  | 2.9:1 |
| 13 | <b>A13</b> , ( <i>R</i> )-2,4,6- <i>i</i> Pr <sub>3</sub> C <sub>6</sub> H <sub>2</sub>    | 68 | -   | 11  | >20:1 |
| 14 | <b>A14</b> , ( <i>R</i> )-3,5-Me <sub>2</sub> C <sub>6</sub> H <sub>3</sub>                | 76 | 13  | -31 | 1.8:1 |
| 15 | <b>A15</b> , ( <i>R</i> )-3,5-Cl <sub>2</sub> C <sub>6</sub> H <sub>3</sub>                | 56 | 7   | -10 | 1.4:1 |
| 16 | <b>B1</b> , ( <i>R</i> )-9-anthracenyl                                                     | 90 | 37  | 12  | 2.4:1 |
| 17 | <b>B2</b> , ( <i>R</i> )-1-naphthyl                                                        | 78 | 32  | 2   | 1:1.3 |
| 18 | <b>B3</b> , ( <i>R</i> )-2,4,6- <i>i</i> Pr <sub>3</sub> C <sub>6</sub> H <sub>2</sub>     | 52 | 60  | 48  | 9:1   |
| 19 | <b>B4</b> , ( <i>R</i> )-3,5- <i>t</i> BuC <sub>6</sub> H <sub>3</sub>                     | 34 | -10 | -28 | 6.8:1 |
| 20 | <b>B5</b> , ( <i>R</i> )-I                                                                 | 80 | 78  | 12  | 1:1.1 |
| 21 | <b>B6</b> , ( <i>R</i> )-Br                                                                | 80 | 66  | 18  | 1:1.2 |
| 22 | <b>B7</b> , ( <i>R</i> )-3,5-(CF <sub>3</sub> ) <sub>2</sub> C <sub>6</sub> H <sub>3</sub> | 70 | -7  | -33 | 4.2:1 |
| 23 | <b>S1</b> , ( <i>R</i> )-9-anthracenyl                                                     | 77 | 63  | 41  | 13:1  |
| 24 | <b>S2</b> , ( <i>R</i> )-1-pyrenyl                                                         | 74 | 72  | 76  | 6:1   |
| 25 | <b>S3</b> , ( <i>R</i> )-1-naphthyl                                                        | 60 | 44  | 58  | 4.1:1 |
| 26 | <b>S4</b> , ( <i>R</i> )-2-naphthyl                                                        | 73 | 44  | 66  | 6:1   |
| 27 | <b>D1</b> , ( <i>S</i> )-9-phenanthryl                                                     | 72 | -44 | -57 | 12:1  |
| 28 | <b>D2</b> , ( <i>S</i> )-3,5- <i>t</i> BuC <sub>6</sub> H <sub>3</sub>                     | 20 | -   | -   | 9:1   |
| 29 | <b>D3</b> , ( <i>S</i> )-3,5-(CF <sub>3</sub> ) <sub>2</sub> C <sub>6</sub> H <sub>3</sub> | 67 | -52 | -50 | 4.3:1 |
| 30 | <b>E</b> , ( <i>R</i> )-VAPOL                                                              | 80 | 24  | -14 | 2:1   |

<sup>a</sup>Reaction conditions: indolizine **1a** (0.030 mmol), *N*-Boc aminal **2a** (0.033 mmol), CPA (10 mol%), Toluene (0.3 mL). <sup>b</sup>Estimated by HPLC. <sup>c</sup>Determined by HPLC.

**Table S2.** Screening of solvents for reaction between indolizine **1a** and *N*-Boc aminal **2a** using **B5** catalyst<sup>a</sup>

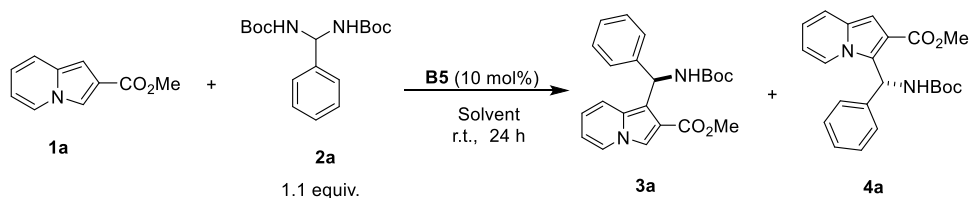

| Entry | Solvent                   | Conversion (%) <sup>b</sup> | <b>3a</b> e.e. (%) <sup>c</sup> | <b>4a</b> e.e. (%) <sup>c</sup> | Ratio <b>4a:3a</b> |
|-------|---------------------------|-----------------------------|---------------------------------|---------------------------------|--------------------|
| 1     | toluene                   | 73                          | 78                              | 12                              | 1:1.1              |
| 2     | trifluorotoluene          | 87                          | 67                              | -                               | 1:1                |
| 3     | chlorobenzene             | 80                          | 76                              | -                               | 1:1                |
| 4     | <i>tert</i> -butylbenzene | 78                          | 73                              | -                               | 1:1                |

|    |                    |    |    |    |       |
|----|--------------------|----|----|----|-------|
| 5  | <i>p</i> -xylene   | 84 | 81 | -  | 1:1   |
| 6  | benzene            | 75 | 82 | -  | 1:1   |
| 7  | hexafluorobenzene  | 70 | 55 | -  | 3.3:1 |
| 8  | DCM                | 78 | 45 | 2  | 1:1.4 |
| 9  | DCE                | 72 | 32 | -  | 1:1.7 |
| 10 | tetrachloromethane | 65 | 66 | -  | 1.3:1 |
| 11 | EtOAc              | 78 | 78 | 23 | 1:2   |
| 12 | MeCN               | 0  | -  | -  | -     |
| 13 | isopropanol        | 62 | 10 | -  | 1:1   |
| 14 | hexane             | 80 | 64 | -6 | 1.5:1 |

<sup>a</sup>Reaction conditions: indolizine **1a** (0.030 mmol), *N*-Boc aminor **2a** (0.033 mmol), CPA (10 mol%), Solvent (0.3 mL). <sup>b</sup>Estimated by HPLC. <sup>c</sup>Determined by HPLC.

**Table S3.** Screening of additives for reaction between indolizine **1a** and *N*-Boc aminor **2a** using **B5** catalyst<sup>a</sup>

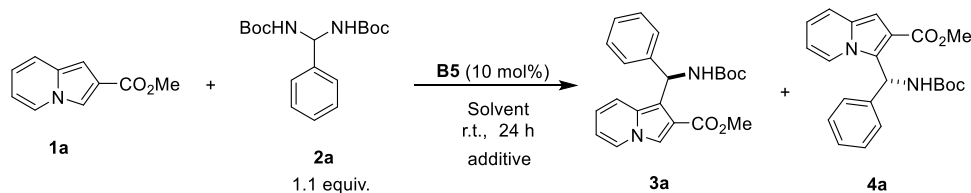

| Entry | Additive                                | Conversion (%) <sup>b</sup> | <b>3a</b> e.e. (%) <sup>c</sup> | Ratio <b>4a:3a</b> |
|-------|-----------------------------------------|-----------------------------|---------------------------------|--------------------|
| 1     | -                                       | 75                          | 82                              | 1:1                |
| 2     | Na <sub>2</sub> SO <sub>4</sub> (15 mg) | 81                          | 81                              | 1.1:1              |
| 3     | MgSO <sub>4</sub> (15 mg)               | 79                          | 82                              | 1.3:1              |
| 4     | MS 3 Å (15 mg)                          | 84                          | 91                              | 1:1                |
| 5     | MS 3 Å (15 mg)                          | 89                          | 87                              | 1:1                |
| 6     | MS 3 Å (7.5 mg)                         | 82                          | 91                              | 1:1.1              |
| 7     | MS 3 Å (30 mg)                          | 92                          | 90                              | 1:1                |

<sup>a</sup>Reaction conditions: indolizine **1a** (0.030 mmol), *N*-Boc aminor **2a** (0.033 mmol), **B5** (10 mol%), benzene (0.3 mL). <sup>b</sup>Estimated by HPLC. <sup>c</sup>Determined by HPLC.

**Table S4.** Optimization of catalyst concentration for reaction between indolizine **1a** and *N*-Boc aminal **2a** using **B5** catalyst<sup>a</sup>

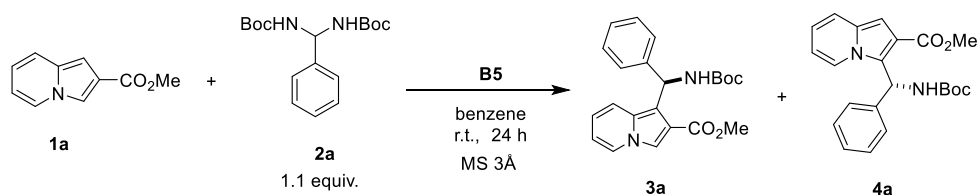

| Entry | <b>B5</b> (%) | Conversion (%) <sup>b</sup> | <b>3a</b> e.e. (%) <sup>c</sup> | Ratio <b>4a:3a</b> |
|-------|---------------|-----------------------------|---------------------------------|--------------------|
| 1     | 10            | 82                          | 91                              | 1:1.1              |
| 2     | 15            | 83                          | 86                              | 1:1.4              |
| 3     | 5             | 82                          | 88                              | 1:1                |

<sup>a</sup>Reaction conditions: indolizine **1a** (0.030 mmol), *N*-Boc aminal **2a** (0.033 mmol), MS 3Å (7.5 mg), benzene (0.3 mL). <sup>b</sup>Estimated by HPLC. <sup>c</sup>Determined by HPLC.

**Table S5.** Optimization of **2a** equivalents for reaction between indolizine **1a** and *N*-Boc aminal **2a** using **B5** catalyst<sup>a</sup>

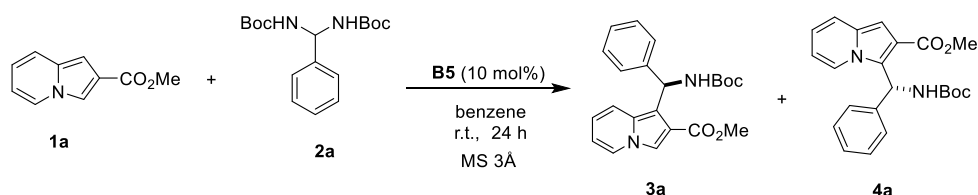

| Entry | <b>2a</b> (equiv.) | Conversion (%) <sup>b</sup> | <b>3a</b> e.e. (%) <sup>c</sup> | Ratio <b>4a:3a</b> |
|-------|--------------------|-----------------------------|---------------------------------|--------------------|
| 1     | 1.1                | 82                          | 91                              | 1:1.1              |
| 2     | 0.9                | 80                          | 89                              | 1:1.1              |
| 3     | 1.5                | 99                          | 91                              | 3.6:1              |
| 4     | 2.0                | 99                          | 92                              | 6.8:1              |
| 5     | 3.0                | 99                          | -                               | >20:1              |

<sup>a</sup>Reaction conditions: indolizine **1a** (0.030 mmol), MS 3Å (7.5 mg), **B5** (10 mol%), benzene (0.3 mL).

<sup>b</sup>Estimated by HPLC. <sup>c</sup>Determined by HPLC.

**Table S6.** Optimization of concentration of reaction between indolizine **1a** and *N*-Boc aminal **2a**<sup>a</sup> using **B5** catalyst

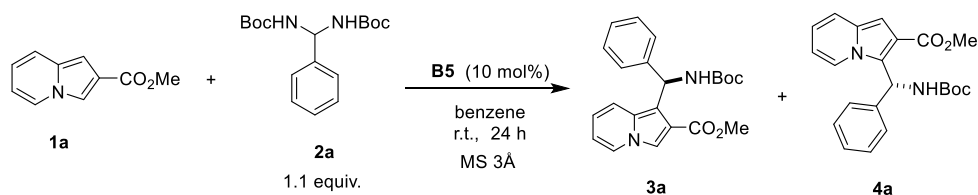

| Entry          | Concentration (mM) | Conversion (%) <sup>b</sup> | <b>3a</b> e.e. (%) <sup>c</sup> | Ratio <b>4a:3a</b> |
|----------------|--------------------|-----------------------------|---------------------------------|--------------------|
| 1              | 0.10               | 82                          | 91                              | 1:1.1              |
| 2              | 0.15               | 80                          | 88                              | 1:1.2              |
| 3              | 0.05               | 88                          | 93                              | 1.1:1              |
| 4              | 0.03               | 83                          | 93                              | 1.4:1              |
| 5 <sup>d</sup> | 0.01               | 95                          | 92                              | 1.5:1              |

<sup>a</sup>Reaction conditions: indolizine **1a** (0.03 mmol), *N*-Boc aminal **2a** (0.033 mmol), **B5** (10 mol%), MS 3Å (7.5 mg). <sup>b</sup>Estimated by HPLC. <sup>c</sup>Determined by HPLC. <sup>d</sup>Time of the reaction = 72 hours.

**Table S7.** Optimization of temperature of reaction between indolizine **1a** and *N*-Boc aminal **2a**<sup>a</sup> using **B5** catalyst

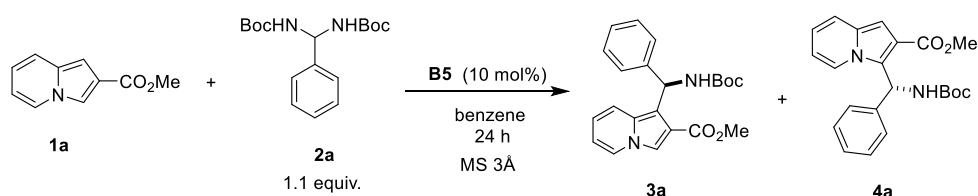

| Entry          | Solvent               | T (°C) | Conversion (%) <sup>b</sup> | <b>3a</b> e.e. (%) <sup>c</sup> | Ratio <b>4a:3a</b> |
|----------------|-----------------------|--------|-----------------------------|---------------------------------|--------------------|
| 1              | benzene               | r.t.   | 88                          | 93                              | 1.1:1              |
| 2              | benzene               | 45     | 90                          | 85                              | 1.4:1              |
| 3              | benzene               | 15     | 90                          | 93                              | 1:1                |
| 4 <sup>d</sup> | benzene               | 10     | 95                          | 94                              | 1:1                |
| 5 <sup>e</sup> | benzene:toluene (2:1) | -15    | 80                          | 93                              | 1:1                |
| 6 <sup>f</sup> | benzene:toluene (1:2) | -30    | 84                          | 94                              | 1:1                |

<sup>a</sup>Reaction conditions: indolizine **1a** (0.030 mmol), *N*-Boc aminal **2a** (0.033 mmol), MS 3Å (7.5 mg), **B5** (10 mol%), benzene (0.6 mL). <sup>b</sup>Estimated by HPLC. <sup>c</sup>Determined by HPLC. <sup>d</sup>Time of the reaction = 48 hours. <sup>e</sup>Time of the reaction = 72 hours, solvent (1.0 mL). <sup>f</sup>Time of the reaction = 96 hours, solvent (2.0 mL).

**Table S8.** Optimization of excess of **2a** equivalents for reaction between indolizine **1a** and *N*-Boc aminal **2a**<sup>a</sup> using **B5** catalyst

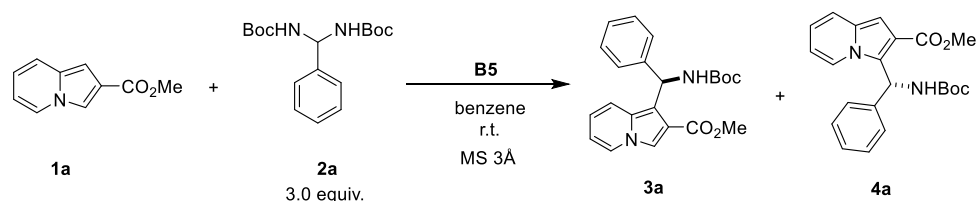

| Entry          | Solvent | <b>B5</b> (%) | Time (h) | Conversion (%) <sup>b</sup> | <b>3a</b> (e.e.) (%) <sup>c</sup> | Ratio <b>4a:3a</b> |
|----------------|---------|---------------|----------|-----------------------------|-----------------------------------|--------------------|
| 1 <sup>d</sup> | benzene | 10            | 24       | 99                          | 92                                | 6.8:1              |
| 2              | benzene | 10            | 24       | 99                          | -                                 | >20:1              |
| 3              | benzene | 15            | 0.67     | 99                          | -                                 | 17:1               |
| 4              | toluene | 15            | 0.67     | 99                          | 92                                | 1.6:1              |
| 5 <sup>e</sup> | toluene | 15            | 0.67     | 99                          | 96                                | 4.6:1              |
| 6 <sup>e</sup> | toluene | 18            | 0.67     | 99                          | 98                                | 3.3:1              |
| 7 <sup>e</sup> | toluene | 18            | 0.67     | 99                          | 99                                | 5:1                |

<sup>a</sup>Reaction conditions: indolizine **1a** (0.030 mmol), *N*-Boc aminal **2a** (0.09 mmol), MS 3Å (7.5 mg), solvent (0.3 mL). <sup>b</sup>Estimated by HPLC. <sup>c</sup>Determined by HPLC. <sup>d</sup>*N*-Boc aminal **2a** (0.06 mmol). <sup>e</sup>Toluene (1.0 mL).

**Table S9.** Screening of solvents for reaction between **1a** and **2a**<sup>a</sup> using **S2** catalyst

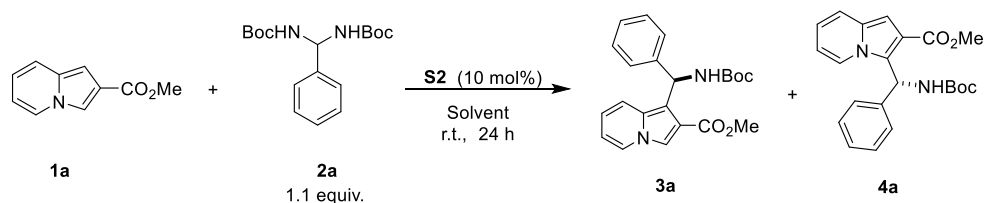

| Entry | Solvent | Conversion (%) <sup>b</sup> | <b>4a</b> e.e. (%) <sup>c</sup> | <b>3a</b> e.e. (%) <sup>c</sup> | Ratio <b>4a:3a</b> |
|-------|---------|-----------------------------|---------------------------------|---------------------------------|--------------------|
| 1     | toluene | 74                          | 76                              | 72                              | 6:1                |

|                 |                           |             |    |    |       |
|-----------------|---------------------------|-------------|----|----|-------|
| 2               | trifluorotoluene          | 55          | 81 | -  | >20:1 |
| 3               | fluorobenzene             | 41          | 81 | -  | 9:1   |
| 4               | chlorobenzene             | 52          | 79 | 76 | 7:1   |
| 5               | <i>tert</i> -butylbenzene | 55          | 79 | -  | 13:1  |
| 6               | benzene                   | 50          | 78 | -  | 8:1   |
| 7               | hexafluorobenzene         | 22          | 79 | -  | >20:1 |
| 8               | <i>o</i> -xylene          | 55          | 80 | -  | 12:1  |
| 9               | <i>m</i> -xylene          | 50          | 81 | -  | 13:1  |
| 10              | <i>p</i> -xylene          | 76          | 81 | -  | >20:1 |
| 11              | DCM                       | 80          | 67 | 62 | 7:1   |
| 12              | DCE                       | 80          | 78 | 71 | 6.4:1 |
| 13              | tetrachloromethane        | 67          | 74 | -  | 7.5:1 |
| 14              | CHCl <sub>3</sub>         | 50          | 81 | -  | 12:1  |
| 15              | tetrachloroethylene       | 40          | 80 | -  | 8:1   |
| 16 <sup>d</sup> | 1,1,1-trichloroethane     | 10          | 84 | -  | >20:1 |
| 17              | EtOAc                     | 12          | 62 | 42 | 1:1   |
| 18              | Et <sub>2</sub> O         | 48          | 79 | -  | 15:1  |
| 19              | vinyl acetate             | No reaction | -  | -  | -     |

<sup>a</sup>Reaction conditions: indolizine **1a** (0.030 mmol), *N*-Boc aminal **2a** (0.033 mmol), **S2** (10 mol%), Solvent (0.3 mL). <sup>b</sup>Estimated by HPLC. <sup>c</sup>Determined by HPLC. <sup>d</sup>The reaction was left for additional one week of stirring but the conversion remained  $\approx$  10%.

**Table S10.** Optimization of **2a** equivalents for reaction between indolizine **1a** and *N*-Boc aminal **2a**<sup>a</sup> using **S2** catalyst

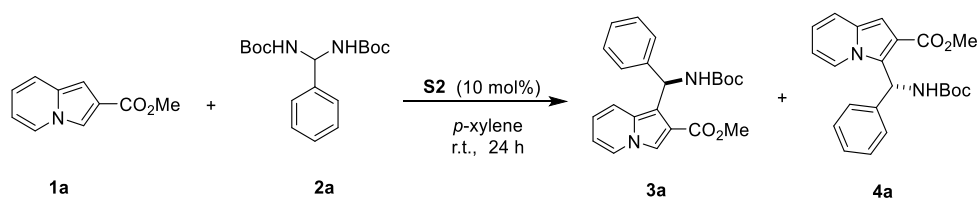

| Entry          | <b>2a</b> (equiv.) | Conversion (%) <sup>b</sup> | <b>4a</b> e.e. (%) <sup>c</sup> | Ratio <b>4a:3a</b> |
|----------------|--------------------|-----------------------------|---------------------------------|--------------------|
| 1              | 1.1                | 76                          | 81                              | >20:1              |
| 2 <sup>d</sup> | 1.1                | 73                          | 80                              | 9:1                |
| 3              | 0.8                | 55                          | 75                              | 16:1               |
| 4              | 2.0                | 85                          | 77                              | 17:1               |

<sup>a</sup>Reaction conditions: indolizine **1a** (0.03 mmol), **S2** (10 mol%), Solvent (0.3 mL). <sup>b</sup>Estimated by HPLC. <sup>c</sup>Determined by HPLC. <sup>d</sup>CPA (15 mol%).

**Table S11.** Screening of additives for reaction between indolizine **1a** and *N*-Boc aminor **2a**<sup>a</sup> using **S2** catalyst

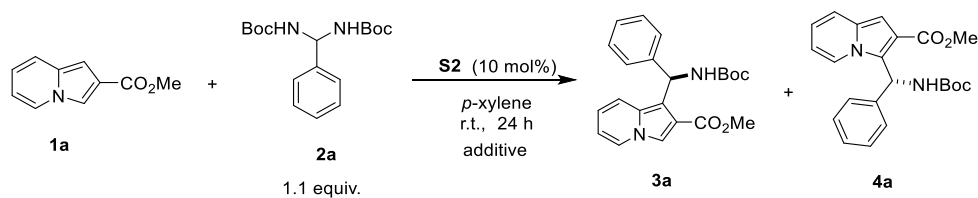

| Entry | Additive                        | Conversion (%) <sup>b</sup> | <b>4a</b> e.e. (%) <sup>c</sup> | Ratio <b>4a:3a</b> |
|-------|---------------------------------|-----------------------------|---------------------------------|--------------------|
| 1     | -                               | 76                          | 81                              | >20:1              |
| 2     | MS 3Å                           | 60                          | 78                              | 10:1               |
| 3     | MgSO <sub>4</sub>               | 80                          | 78                              | 7.5:1              |
| 4     | Na <sub>2</sub> SO <sub>4</sub> | 60                          | 82                              | 15:1               |

<sup>a</sup>Reaction conditions: indolizine **1a** (0.030 mmol), *N*-Boc aminor **2a** (0.033 mmol), **S2** (10 mol%), additive (15 mg), Solvent (0.3 mL). <sup>b</sup>Estimated by HPLC. <sup>c</sup>Determined by HPLC.

**Table S12.** Preliminary screening of catalysts for reaction between indolizine **1a** and *N*-Cbz aminal **5a**<sup>a</sup>

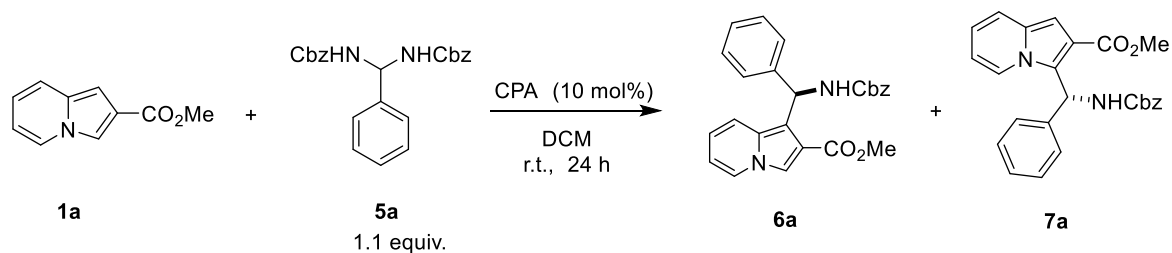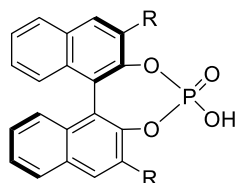

**A1:** R = 9-anthracyl  
**A2:** R = 9-phenanthryl  
**A3:** R = 2,4,6-Cy<sub>3</sub>C<sub>6</sub>H<sub>2</sub>  
**A4:** R = 3,5-<sup>*i*</sup>BuC<sub>6</sub>H<sub>3</sub>  
**A5:** R = 3,5-(CF<sub>3</sub>)<sub>2</sub>C<sub>6</sub>H<sub>3</sub>  
**A6:** R = I  
**A8:** R = 4-PhC<sub>6</sub>H<sub>4</sub>  
**A9:** R = 3,5-Ph<sub>2</sub>C<sub>6</sub>H<sub>3</sub>  
**A10:** R = 1-naphthyl  
**A12:** R = 2,4,6-Me<sub>3</sub>C<sub>6</sub>H<sub>2</sub>  
**A13:** R = 2,4,6-<sup>*i*</sup>Pr<sub>3</sub>C<sub>6</sub>H<sub>2</sub>  
**A14:** R = 3,5-Me<sub>2</sub>C<sub>6</sub>H<sub>3</sub>  
**A15:** R = 3,5-Cl<sub>2</sub>C<sub>6</sub>H<sub>3</sub>  
**A16:** R = 3,5-(NO<sub>2</sub>)<sub>2</sub>C<sub>6</sub>H<sub>3</sub>  
**A17:** R = 2-naphthyl  
**A18:** R = C<sub>6</sub>F<sub>5</sub>  
**A19:** R = 10-phenyl-9-anthracenyl

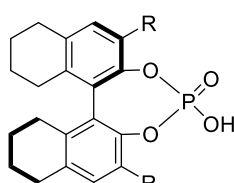

**B1:** R = 9-anthracyl  
**B2:** R = 1-naphthyl  
**B3:** R = 2,4,6-<sup>*i*</sup>Pr<sub>3</sub>C<sub>6</sub>H<sub>2</sub>  
**B4:** R = 3,5-<sup>*i*</sup>BuC<sub>6</sub>H<sub>3</sub>  
**B5:** R = I  
**B6:** R = Br  
**B7:** R = 3,5-(CF<sub>3</sub>)<sub>2</sub>C<sub>6</sub>H<sub>3</sub>

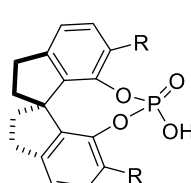

**S3:** R = 1-naphthyl

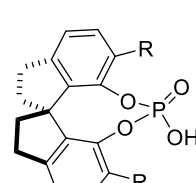

**D1:** R = 9-phenanthryl  
**D3:** R = 3,5-(CF<sub>3</sub>)<sub>2</sub>C<sub>6</sub>H<sub>3</sub>

| Entry | Catalyst                                                                                   | Conversion (%) <sup>b</sup> | <b>7a</b> e.e. (%) <sup>c</sup> | <b>6a</b> e.e. (%) <sup>c</sup> | Ratio <b>7a:6a</b> |
|-------|--------------------------------------------------------------------------------------------|-----------------------------|---------------------------------|---------------------------------|--------------------|
| 1     | <b>A1</b> , ( <i>R</i> )-9-anthracenyl                                                     | 82                          | 22                              | 78                              | 1:1                |
| 2     | <b>A2</b> , ( <i>R</i> )-9-phenanthryl                                                     | 70                          | 4                               | 12                              | 1:1.5              |
| 3     | <b>A3</b> , ( <i>R</i> )-2,4,6-Cy <sub>3</sub> C <sub>6</sub> H <sub>2</sub>               | 36                          | 20                              | -                               | 7.4:1              |
| 4     | <b>A4</b> , ( <i>R</i> )-3,5- <sup><i>i</i></sup> BuC <sub>6</sub> H <sub>3</sub>          | 68                          | -28                             | -                               | 5:1                |
| 5     | <b>A5</b> , ( <i>R</i> )-3,5-(CF <sub>3</sub> ) <sub>2</sub> C <sub>6</sub> H <sub>3</sub> | 87                          | 0                               | nd                              | 1:1                |
| 6     | <b>A6</b> , ( <i>R</i> )-I                                                                 | 93                          | 0                               | 12                              | 1:3.2              |
| 7     | <b>A8</b> , ( <i>R</i> )-4-PhC <sub>6</sub> H <sub>4</sub>                                 | 85                          | 2                               | 11                              | 1:2                |



|    |                                                                                                    |    |     |     |       |
|----|----------------------------------------------------------------------------------------------------|----|-----|-----|-------|
| 8  | <b>A9</b> , ( <i>R</i> )-3,5-Ph <sub>2</sub> C <sub>6</sub> H <sub>3</sub>                         | 85 | -2  | -6  | 1.3:1 |
| 9  | <b>A10</b> , ( <i>R</i> )-1-naphthyl                                                               | 87 | 1   | 6   | 1:1.8 |
| 10 | <b>A12</b> , ( <i>R</i> )-2,4,6-Me <sub>3</sub> C <sub>6</sub> H <sub>2</sub>                      | 80 | 10  | 24  | 1.7:1 |
| 11 | <b>A13</b> , ( <i>R</i> )-2,4,6- <sup><i>i</i></sup> Pr <sub>3</sub> C <sub>6</sub> H <sub>2</sub> | 63 | 24  | -   | 4.9:1 |
| 12 | <b>A14</b> , ( <i>R</i> )-3,5-Me <sub>2</sub> C <sub>6</sub> H <sub>3</sub>                        | 76 | -28 | -24 | 1.9:1 |
| 13 | <b>A15</b> , ( <i>R</i> )-3,5-Cl <sub>2</sub> C <sub>6</sub> H <sub>3</sub>                        | 85 | -1  | -8  | 1:3.2 |
| 14 | <b>A16</b> , ( <i>R</i> )-3,5-(NO <sub>2</sub> ) <sub>2</sub> C <sub>6</sub> H <sub>3</sub>        | 94 | -4  | 4   | 1:2   |
| 15 | <b>A17</b> , ( <i>R</i> )-2-naphthyl                                                               | 87 | 0   | 11  | 1:2.9 |
| 16 | <b>A18</b> , ( <i>R</i> )-C <sub>6</sub> F <sub>5</sub>                                            | 90 | -4  | -4  | 1:1.3 |
| 17 | <b>A19</b> , 10-phenyl-9-anthracenyl                                                               | 70 | 20  | 74  | 6.9:1 |
| 18 | <b>B1</b> , ( <i>R</i> )-9-anthracenyl                                                             | 90 | 82  | 92  | 1.8:1 |
| 19 | <b>B2</b> , ( <i>R</i> )-1-naphthyl                                                                | 78 | 6   | 36  | 1.8:1 |
| 20 | <b>B3</b> , ( <i>R</i> )-2,4,6- <sup><i>i</i></sup> Pr <sub>3</sub> C <sub>6</sub> H <sub>2</sub>  | 30 | 18  | -   | 5.7:1 |
| 21 | <b>B4</b> , ( <i>R</i> )-3,5- <sup><i>t</i></sup> BuC <sub>6</sub> H <sub>3</sub>                  | 35 | -33 | -   | 7.1:1 |
| 22 | <b>B5</b> , ( <i>R</i> )-I                                                                         | 93 | 2   | 12  | 1:3.8 |
| 23 | <b>B6</b> , ( <i>R</i> )-Br                                                                        | 96 | 4   | 4   | 1:3.1 |
| 24 | <b>B7</b> , ( <i>R</i> )-3,5-(CF <sub>3</sub> ) <sub>2</sub> C <sub>6</sub> H <sub>3</sub>         | 72 | -16 | -2  | 3:1   |
| 25 | <b>S3</b> , ( <i>R</i> )-1-naphthyl                                                                | 50 | -30 | -   | 4.6:1 |
| 26 | <b>D1</b> , ( <i>S</i> )-9-phenanthryl                                                             | 65 | 2   | 54  | 4.6:1 |
| 27 | <b>D3</b> , ( <i>S</i> )-3,5-(CF <sub>3</sub> ) <sub>2</sub> C <sub>6</sub> H <sub>3</sub>         | 61 | -54 | -   | 5.3:1 |

<sup>a</sup>Reaction conditions: indolizine **1a** (0.01 mmol), *N*-Cbz aminal **5a** (0.011 mmol), CPA (10 mol%), DCM (0.5 mL). <sup>b</sup>Estimated by HPLC. <sup>c</sup>Determined by HPLC. <sup>d</sup>Not determined.

**Table S13.** Screening of solvents for reaction between indolizine **1a** and *N*-Cbz aminal **5a**<sup>a</sup>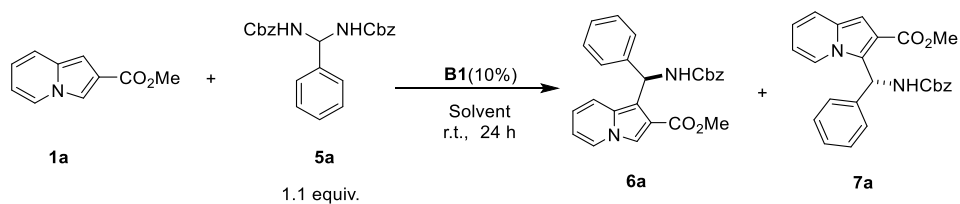

| Entry | Solvent                        | Conversion (%) <sup>b</sup> | <b>7a</b> e.e. (%) <sup>c</sup> | <b>6a</b> e.e. (%) <sup>c</sup> | Ratio <b>7a:6a</b> |
|-------|--------------------------------|-----------------------------|---------------------------------|---------------------------------|--------------------|
| 1     | toluene                        | 93                          | 84                              | 86                              | 5:1                |
| 2     | trifluorotoluene               | 94                          | 68                              | 86                              | 2.8:1              |
| 3     | fluorobenzene                  | 85                          | 54                              | 83                              | 1.9:1              |
| 4     | chlorobenzene                  | 87                          | 86                              | 91                              | 2.9:1              |
| 5     | bromobenzene                   | 82                          | 80                              | 89                              | 3.3:1              |
| 6     | <i>tert</i> -butylbenzene      | 90                          | 60                              | 70                              | 3.1:1              |
| 7     | <i>o</i> -xylene               | 100                         | 71                              | 80                              | 1.9:1              |
| 8     | <i>m</i> -xylene               | 95                          | 71                              | 81                              | 2.8:1              |
| 9     | <i>p</i> -xylene               | 88                          | 67                              | 78                              | 2.4:1              |
| 10    | benzene                        | 86                          | 63                              | 87                              | 1.7:1              |
| 11    | hexafluorobenzene              | 71                          | 3                               | 24                              | 1.8:1              |
| 12    | DCM                            | 90                          | 82                              | 92                              | 1.8:1              |
| 13    | DCE                            | 72                          | 76                              | 90                              | 2.2:1              |
| 14    | CHCl <sub>3</sub>              | 90                          | 75                              | 84                              | 2.8:1              |
| 15    | 1,1,1-trichloroethane          | <5                          | -                               | -                               | -                  |
| 16    | EtOAc                          | 100                         | 78                              | -                               | 10:1               |
| 17    | MeOH                           | 95                          | 4                               | 10                              | 1:1.2              |
| 18    | Et <sub>2</sub> O              | <5                          | -                               | -                               | -                  |
| 19    | <i>tert</i> -butylmethyl ether | <5                          | -                               | -                               | -                  |

<sup>a</sup>Reaction conditions: indolizine **1a** (0.010 mmol), *N*-Cbz aminal **5a** (0.011 mmol), **B1** (10 mol%), Solvent (0.5 mL). <sup>b</sup>Estimated by HPLC. <sup>c</sup>Determined by HPLC.

**Table S14.** Optimization of catalyst concentration for reaction between indolizine **1a** and *N*-Cbz aminal **5a**<sup>a</sup>

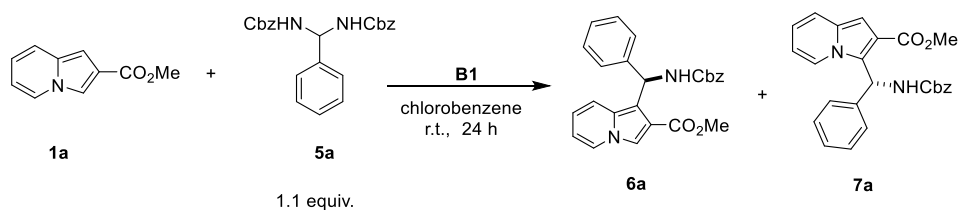

| Entry | <b>B1</b> (%) | Conversion (%) <sup>b</sup> | <b>7a</b> e.e. (%) <sup>c</sup> | <b>6a</b> e.e. (%) <sup>c</sup> | Ratio <b>7a:6a</b> |
|-------|---------------|-----------------------------|---------------------------------|---------------------------------|--------------------|
| 1     | 10            | 87                          | 86                              | 91                              | 2.9:1              |
| 2     | 20            | 95                          | 82                              | 89                              | 2.7:1              |
| 3     | 5             | 90                          | 89                              | -                               | 5.1:1              |
| 4     | 2.5           | 68                          | 89                              | -                               | 4.7:1              |

<sup>a</sup>Reaction conditions: indolizine **1a** (0.010 mmol), *N*-Cbz aminal **5a** (0.011 mmol), chlorobenzene (0.5 mL). <sup>b</sup>Estimated by HPLC. <sup>c</sup>Determined by HPLC.

**Table S15.** Screening of additives for reaction between indolizine **1a** and *N*-Cbz aminal **5a**<sup>a</sup>

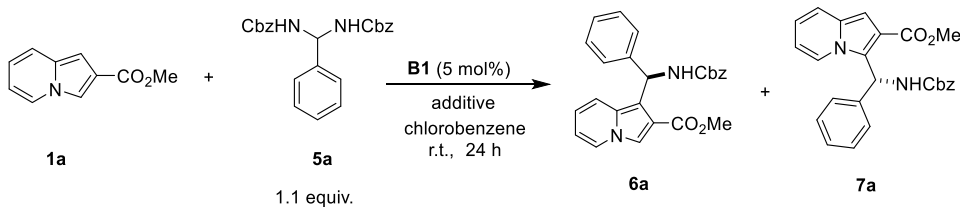

| Entry | <b>5a</b> (equiv.) | Concen. (mM) | additive                        | Conv. (%) <sup>b</sup> | <b>7a</b> e.e. (%) <sup>c</sup> | Ratio <b>7a:6a</b> |
|-------|--------------------|--------------|---------------------------------|------------------------|---------------------------------|--------------------|
| 1     | 1.1                | 0.02         |                                 | 90                     | 89                              | 5.1:1              |
| 2     | 1.1                | 0.02         | MS 3Å                           | 96                     | 84                              | 2.4:1              |
| 3     | 1.1                | 0.02         | MgSO <sub>4</sub>               | 90                     | 86                              | 4.4:1              |
| 4     | 1.1                | 0.02         | Na <sub>2</sub> SO <sub>4</sub> | 95                     | 89                              | 5.7:1              |
| 5     | 1.1                | 0.01         | Na <sub>2</sub> SO <sub>4</sub> | 83                     | 92                              | 9.2:1              |
| 6     | 1.1                | 0.005        | Na <sub>2</sub> SO <sub>4</sub> | 83                     | 92                              | 8.6:1              |
| 7     | 1.5                | 0.01         | Na <sub>2</sub> SO <sub>4</sub> | 98                     | 92                              | 9.2:1              |

|                |     |      |                                 |    |    |      |
|----------------|-----|------|---------------------------------|----|----|------|
| 8 <sup>d</sup> | 1.5 | 0.01 | Na <sub>2</sub> SO <sub>4</sub> | 23 | 93 | 19:1 |
|----------------|-----|------|---------------------------------|----|----|------|

<sup>a</sup>Reaction conditions: indolizine **1a** (0.01 mmol), **B1** (5 mol%), additive (12.5 mg). <sup>b</sup>Estimated by HPLC. <sup>c</sup>Determined by HPLC. <sup>d</sup>Temperature = 10 °C.

**Table S16.** Relation between overall e.e. of catalyst **B5** and e.e. of product **3a**<sup>a</sup>

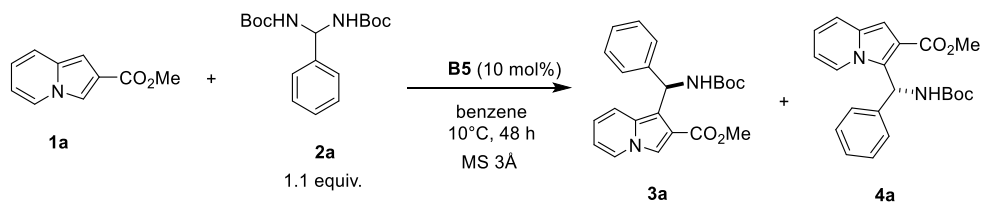

| Entry | Overall e.e. (%) of <b>B5</b> <sup>b</sup> | <b>3a</b> e.e. (%) <sup>c</sup> |
|-------|--------------------------------------------|---------------------------------|
| 1     | 100                                        | 94                              |
| 2     | 90                                         | 86                              |
| 3     | 70                                         | 70                              |
| 4     | 50                                         | 53                              |
| 5     | 40                                         | 43                              |
| 6     | 20                                         | 22                              |
| 7     | 0                                          | 3                               |

<sup>a</sup>Reaction conditions: indolizine **1a** (0.030 mmol), *N*-Boc aminal **2a** (0.033 mmol), MS 3 Å (7.5 mg), CPA (10 mol %), benzene (0.6 mL). <sup>b</sup> Enantiomeric excess of catalyst of catalyst **B5**. <sup>c</sup>Determined by HPLC.

**Table S17.** Relation between overall e.e. of catalyst **B1** and e.e. of product **7a**<sup>a</sup>

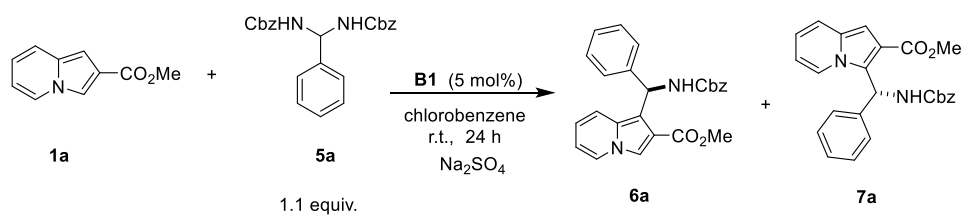

| Entry | Overall e.e. (%) of <b>B1</b> <sup>b</sup> | <b>7a</b> e.e. (%) <sup>c</sup> |
|-------|--------------------------------------------|---------------------------------|
| 1     | 100                                        | 90                              |
| 2     | 90                                         | 80                              |
| 3     | 80                                         | 71                              |
| 4     | 70                                         | 63                              |

|   |    |    |
|---|----|----|
| 5 | 60 | 54 |
| 6 | 40 | 36 |
| 7 | 20 | 20 |
| 8 | 0  | 1  |

<sup>a</sup>Reaction conditions: indolizine **1a** (0.01 mmol), *N*-Cbz aminal **5a** (0.015 mmol), **B1** (5 mol%), Na<sub>2</sub>SO<sub>4</sub> (12.5 mg) chlorobenzene (1.0 mL). <sup>b</sup>Enantiomeric excess of catalyst **B1**. <sup>c</sup>Determined by HPLC.

### 3. Asymmetric synthesis of chiral regioisomers

#### 3.1. General procedure A

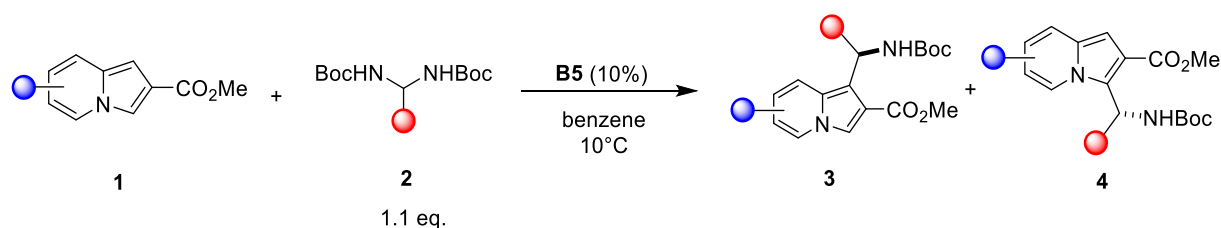

Indolizine **1** (0.457 mmol), catalyst **B5** (27.8 mg, 0.046 mmol) and Molecular sieves 3 Å (114 mg) were dissolved in dry benzene (4.6 mL) at 10 °C under inert atmosphere. Then, a solution of *N*-Boc aminal **2** (0.503 mmol) in benzene (4.6 mL) was added to the reaction mixture and stirred at 10 °C until the starting material was finished (the reaction was followed by TLC).

#### 3.3. Procedure B

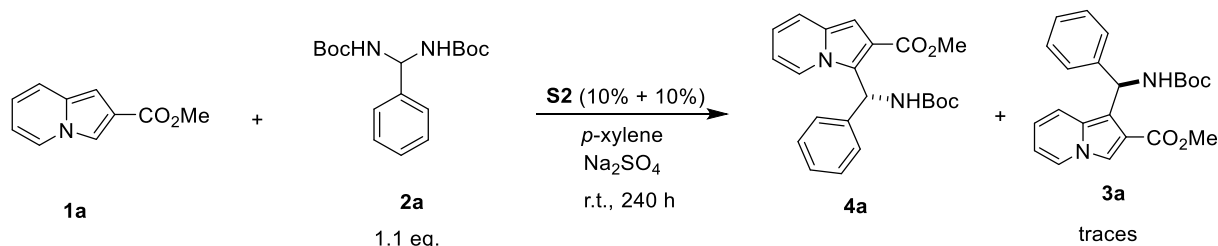

Indolizine **1a** (40.0 mg, 0.228 mmol), catalyst **S2** (16.3 mg, 0.023 mmol) and Na<sub>2</sub>SO<sub>4</sub> (114.3 mg) were dissolved in dry *p*-xylene (1.15 mL) at room temperature under inert atmosphere. Then, a solution of *N*-Boc aminal **2a** (81.0 mg, 0.251 mmol) in dry *p*-xylene (1.15 mL) is added to the reaction mixture and stirred at room temperature for 10 days (additional 16.3 mg of **S2** catalyst was added after 5 days of the reaction). Purification of the reaction mixture by Flash chromatography (85:15 hexane/dichloromethane to 70:30 hexane/dichloromethane + 0.25% Et<sub>3</sub>N).

#### 3.4. General procedure C

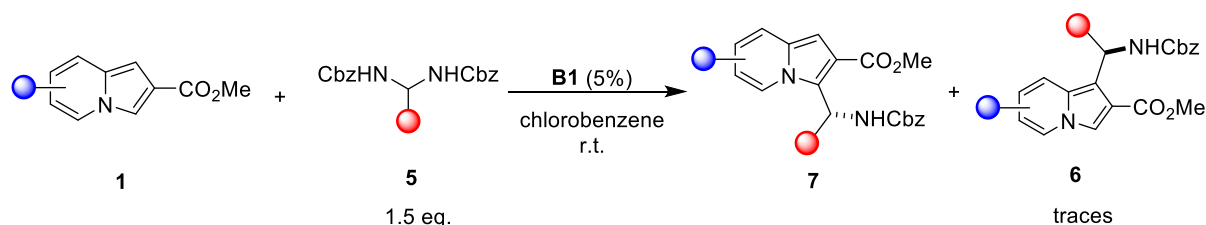

To a mixture of Indolizine **1** (0.342 mmol), *N*-Cbz aminal **5** (0.514 mmol), **B1** catalyst (12.1 mg, 0.071 mmol) and Na<sub>2</sub>SO<sub>4</sub> (429 mg) was added dry chlorobenzene (34.3 mL) at room temperature under inert atmosphere. Then, the reaction mixture was stirred at room temperature until the starting material is finished (the reaction is followed by TLC).

### 3.5. Procedure D

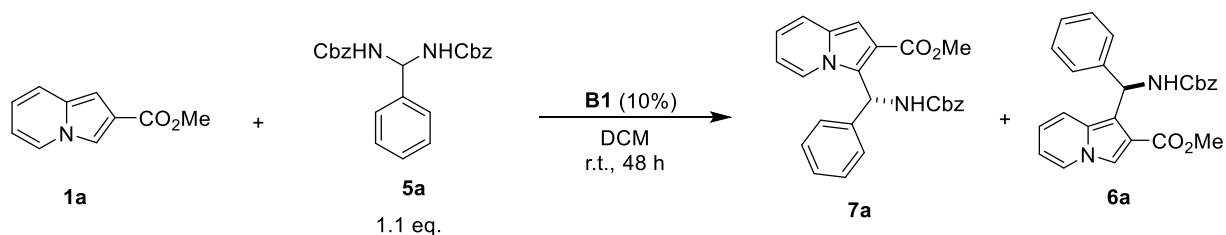

Indolizine **1a** (210.0 mg, 1.20 mmol), *N*-Cbz amination **5a** (515.0 mg, 1.32 mmol) and **B1** catalyst (85.1 mg, 0.12 mmol) were dissolved in dry DCM (60.0 mL) at room temperature under inert atmosphere. Then, the reaction mixture was stirred at room temperature for 48 h. Purification by Flash chromatography (80:20 hexane/dichloromethane to 70:30 hexane/dichloromethane + 0.25% Et<sub>3</sub>N).

### 3.6. Procedure E

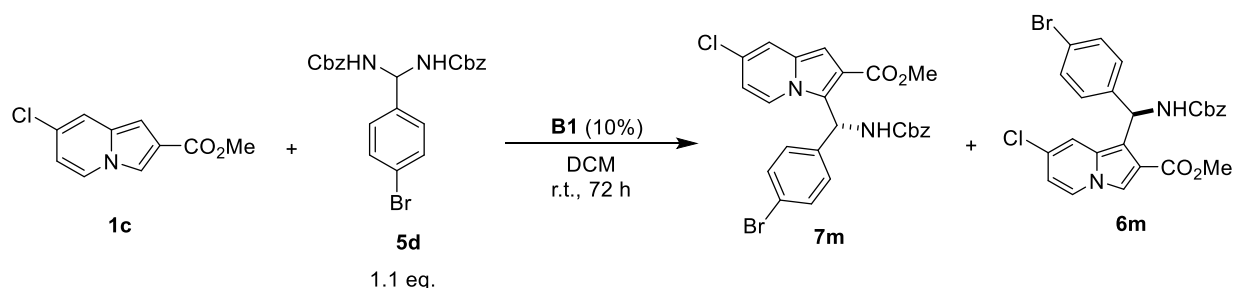

Indolizine **1c** (84.0 mg, 0.40 mmol), *N*-Cbz amination **5d** (206.0 mg, 0.44 mmol) and **B1** catalyst (28.4 mg, 0.04 mmol) were dissolved in dry DCM (20.0 mL) at room temperature under inert atmosphere. Then, the reaction mixture was stirred at room temperature for 72 h. Purification by Flash chromatography (90:10 hexane/ethyl acetate to 80:20 hexane/ethyl acetate + 0.25% Et<sub>3</sub>N).

### 3.7. Products with Boc-protecting group 3a-s, 4a-s and 10

#### Methyl (*R*)-1-(((tert-butoxycarbonyl)amino)(phenyl)methyl)indolizine-2-carboxylate **3a**

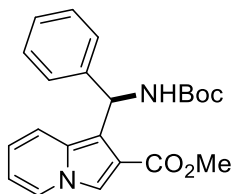

**3a** and **4a** were prepared according to the **General Procedure A**. Purification by Flash chromatography (85:15 hexane/dichloromethane to 70:30 hexane/dichloromethane + 0.25% Et<sub>3</sub>N).

Colorless oil, 56 mg, 32% yield, 96% e.e..

**<sup>1</sup>H NMR** (600 MHz, CDCl<sub>3</sub>) δ 7.80-7.75 (m, 1H), 7.77 (s, 1H), 7.61 (d, *J* = 9.3 Hz, 1H), 7.26-7.21 (m, 4H), 7.19-7.13 (m, 1H), 7.08 (d, *J* = 9.9 Hz, 1H), 6.71 (dd, *J* = 9.3, 6.4 Hz, 1H), 6.58-6.50 (m, 2H), 3.73 (s, 3H), 1.48 (s, 9H).

**<sup>13</sup>C NMR** (151 MHz, CDCl<sub>3</sub>) δ 165.9(C), 156.0(C), 143.1(C), 131.3(C), 128.1(2CH), 126.5(CH), 126.1(2CH), 125.2(CH), 118.7(CH), 118.5(CH), 117.7(CH), 116.4(C), 114.8(C), 112.8(CH), 79.2(C), 51.6(CH<sub>3</sub>), 48.9(CH), 28.63(3CH<sub>3</sub>).

**HRMS** [M+Na]<sup>+</sup> calculated for C<sub>22</sub>H<sub>24</sub>N<sub>2</sub>O<sub>4</sub>Na 403.1634 found 403.1636.

[α]<sub>D</sub><sup>25</sup> = 65.8 (*c* = 0.21, CH<sub>2</sub>Cl<sub>2</sub>).

**HPLC** analysis of the product: Daicel CHIRALCEL OD-H column; 10% *i*PrOH in hexanes; 1.0 mL/min; λ = 254 nm; retention times: 8.5 min (minor), 18.7 min (major).

**Methyl (*R*)-3-(((*tert*-butoxycarbonyl)amino)(phenyl)methyl)indolizine-2-carboxylate 4a**

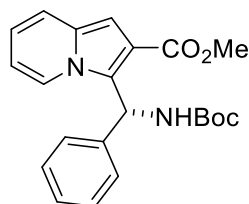

Colorless oil, 73 mg, 42% yield, 37% e.e. (**Procedure A**).

Colorless oil, 75 mg, 86% yield, 82% e.e. (**Procedure B**).

**<sup>1</sup>H NMR** (600 MHz, CDCl<sub>3</sub>) δ 8.06 (d, *J* = 7.3 Hz, 1H), 7.40 (d, *J* = 9.1 Hz, 1H), 7.31-7.18 (m, 4H), 7.16 (d, *J* = 7.6 Hz, 2H), 6.92 (s, 1H), 6.76 (d, *J* = 9.8 Hz, 1H), 6.72 (dd, *J* = 9.1, 6.4 Hz, 1H), 6.61-6.57 (m, 1H), 3.80 (s, 3H), 1.46 (s, 9H).

**<sup>13</sup>C NMR** (151 MHz, CDCl<sub>3</sub>) δ 166.4(C), 156.1(C), 140.5(C), 131.7(C), 128.6(2CH), 128.2(C), 127.3(CH), 126.1(2CH), 122.4(CH), 120.7(CH), 118.2(CH), 116.8(C), 113.1(CH), 102.2(CH), 79.8(C), 51.9(CH<sub>3</sub>), 48.7(CH), 28.6(3CH<sub>3</sub>).

**HRMS** [M+Na]<sup>+</sup> calculated for C<sub>22</sub>H<sub>24</sub>N<sub>2</sub>O<sub>4</sub>Na 403.1634 found 403.1639.

[α]<sub>D</sub><sup>25</sup> = 11.9 (*c* = 0.25, CH<sub>2</sub>Cl<sub>2</sub>) (for 82% e.e.) (**Procedure B**).

**HPLC** analysis of the product: Daicel CHIRALCEL OD-H column; 1% *i*PrOH in hexanes; 1.0 mL/min; λ = 254 nm; retention times: 14.1 min (minor), 18.5 min (major) (**Procedure B**).



**Methyl (*R*)-1-(((*tert*-butoxycarbonyl)amino)(*p*-tolyl)methyl)indolizine-2-carboxylate **3b****

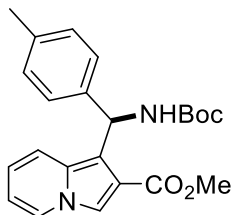

The two regioisomers **3b** and **4b** were prepared according to the General **Procedure A** (reaction time = 4 h). Purification by Flash chromatography (90:10 hexane/dichloromethane to 80:20 hexane/dichloromethane + 0.25% Et<sub>3</sub>N).

Colorless oil, 55 mg, 31% yield, 94% e.e..

**<sup>1</sup>H NMR** (400 MHz, CDCl<sub>3</sub>) δ 7.85-7.76 (m, 2H), 7.60 (d, *J* = 9.3 Hz, 1H), 7.12 (d, *J* = 7.8 Hz, 2H), 7.09-6.98 (m, 3H), 6.71 (ddd, *J* = 9.3, 6.5, 1.1 Hz, 1H), 6.58-6.46 (m, 2H), 3.76 (s, 3H), 2.28 (s, 3H), 1.46 (s, 9H).

**<sup>13</sup>C NMR** (101 MHz, CDCl<sub>3</sub>) δ 166.0, 156.0, 140.2, 136.0, 131.3, 128.9(2C), 126.1(2C), 125.2, 118.64, 118.63, 117.7, 116.5, 115.1, 112.8, 79.1, 51.7, 48.8, 28.7(3C), 21.1.

**HRMS** [M+Na]<sup>+</sup> calculated for C<sub>23</sub>H<sub>26</sub>N<sub>2</sub>O<sub>4</sub>Na 417.1790 found 417.1776.

[α]<sub>D</sub><sup>25</sup> = 39.8 (*c* = 0.28, CH<sub>2</sub>Cl<sub>2</sub>).

**HPLC** analysis of the product: Daicel CHIRALCEL OD-H column; 10% *i*PrOH in hexanes; 1.0 mL/min; λ = 254 nm; retention times: 10.6 min (minor), 21.6 min (major).

**Methyl (*R*)-3-(((*tert*-butoxycarbonyl)amino)(*p*-tolyl)methyl)indolizine-2-carboxylate **4b****

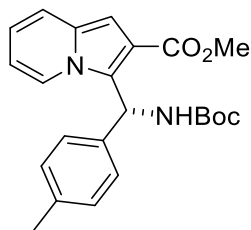

Colorless oil, 86 mg, 48% yield, 43% e.e..

**<sup>1</sup>H NMR** (400 MHz, CDCl<sub>3</sub>) δ 8.08-7.97 (m, 1H), 7.39 (d, *J* = 9.1 Hz, 1H), 7.27 (bs, 1H), 7.10-7.01 (m, 4H), 6.91 (s, 1H), 6.76-6.67 (m, 2H), 6.61-6.54 (m, 1H), 3.81 (s, 3H), 2.28 (s, 3H), 1.45 (s, 9H).

**<sup>13</sup>C NMR** (101 MHz, CDCl<sub>3</sub>) δ 166.4, 156.1, 137.4, 136.9, 131.6, 129.3(2C), 128.3, 126.1(2C), 122.4, 120.6, 118.3, 116.8, 113.0, 102.2, 79.7, 51.8, 48.6, 28.6(3C), 21.1.

**HRMS** [M+Na]<sup>+</sup> calculated for C<sub>23</sub>H<sub>26</sub>N<sub>2</sub>O<sub>4</sub>Na 417.1790 found 417.1783.

**HPLC** analysis of the product: Daicel CHIRALCEL OD-H column; 1% *i*PrOH in hexanes; 1.0 mL/min;  $\lambda$  = 254 nm; retention times: 15.0 min (minor), 18.9 min (major).

**Methyl (*R*)-1-(((*tert*-butoxycarbonyl)amino)(4-(trifluoromethyl)phenyl)methyl)indolizine-2-carboxylate **3c****

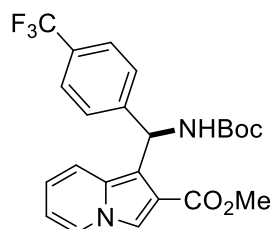

The two regioisomers **3c** and **4c** were prepared according to the **General Procedure A** (reaction time = 38 h). Purification by Flash chromatography (80:20 hexane/dichloromethane to 65:35 hexane/dichloromethane + 0.25% Et<sub>3</sub>N).

Colorless oil, 98 mg, 48% yield, 87% e.e..

**<sup>1</sup>H NMR** (500 MHz, CDCl<sub>3</sub>)  $\delta$  7.83 (d, *J* = 7.4 Hz, 1H), 7.81 (s, 1H), 7.61 (d, *J* = 9.3 Hz, 1H), 7.48 (d, *J* = 8.2 Hz, 2H), 7.34 (d, *J* = 8.2 Hz, 2H), 7.04 (d, *J* = 9.8 Hz, 1H), 6.77 (dd, *J* = 9.3, 6.5 Hz, 1H), 6.61 – 6.53 (m, 2H), 3.76 (s, 3H), 1.47 (s, 9H).

**<sup>13</sup>C NMR** (126 MHz, CDCl<sub>3</sub>)  $\delta$  166.0, 156.0, 147.3, 131.5, 128.8, 126.5(2C), 125.4, 125.1(2C), 124.4 (d, *J* = 271.9 Hz), 119.2, 118.3, 117.9, 116.3, 114.0, 113.1, 79.6, 51.8, 48.7, 28.6(3C).

**<sup>19</sup>F NMR** (470 MHz, CDCl<sub>3</sub>)  $\delta$  -62.35.

**HRMS** [M+Na]<sup>+</sup> calculated for C<sub>23</sub>H<sub>23</sub>N<sub>2</sub>O<sub>4</sub>F<sub>3</sub>Na 471.1508 found 471.1511.

$[\alpha]^{25}_{\text{D}}$  = 88.0 (*c* = 0.14, CH<sub>2</sub>Cl<sub>2</sub>).

**HPLC** analysis of the product: Daicel CHIRALPAK IC column; 5% *i*PrOH in hexanes; 1.0 mL/min;  $\lambda$  = 254 nm; retention times: 8.6 min (major), 12.5 min (minor).

**Methyl (*R*)-3-(((*tert*-butoxycarbonyl)amino)(4-(trifluoromethyl)phenyl)methyl)indolizine-2-carboxylate **4c****

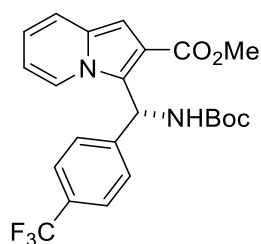

Colorless oil, 86 mg, 42% yield, 63% e.e..

**<sup>1</sup>H NMR** (500 MHz, CDCl<sub>3</sub>) δ 8.08 (d, *J* = 7.3 Hz, 1H), 7.51 (d, *J* = 8.1 Hz, 2H), 7.42 (d, *J* = 9.1 Hz, 1H), 7.31 – 7.21 (m, 3H), 6.92 (s, 1H), 6.79 (d, *J* = 9.7 Hz, 1H), 6.75 (dd, *J* = 9.1, 6.5 Hz, 1H), 6.67 – 6.61 (m, 1H), 3.79 (s, 3H), 1.46 (s, 9H).

**<sup>13</sup>C NMR** (126 MHz, CDCl<sub>3</sub>) δ 166.4, 156.2, 144.7, 131.9, 129.6, 127.4, 126.4(2C), 125.5(2C), 124.3, 122.1, 120.8, 118.4, 116.9, 113.5, 102.4, 80.2, 52.0, 48.3, 28.6(3C).

**<sup>19</sup>F NMR** (470 MHz, CDCl<sub>3</sub>) δ -62.52.

**HRMS** [M+Na]<sup>+</sup> calculated for C<sub>23</sub>H<sub>23</sub>N<sub>2</sub>O<sub>4</sub>F<sub>3</sub>Na 471.1508 found 471.1512.

**HPLC** analysis of the product: Daicel CHIRALCEL OD-H column; 0.3% <sup>i</sup>PrOH in hexanes; 1.0 mL/min; λ = 254 nm; retention times: 18.1 min (minor), 22.0 min (major).

**Methyl (*R*)-1-(((tert-butoxycarbonyl)amino)(4-fluorophenyl)methyl)indolizine-2-carboxylate **3d****

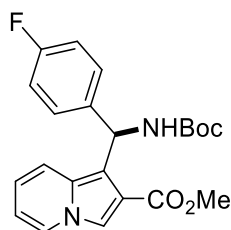

The two regioisomers **3d** and **4d** were prepared according to the **General Procedure A** (reaction time = 6 h). Purification by Flash chromatography (80:20 hexane/dichloromethane to 60:40 hexane/dichloromethane + 0.25% Et<sub>3</sub>N).

Colorless oil, 100 mg, 55% yield, 94% e.e..

**<sup>1</sup>H NMR** (500 MHz, CDCl<sub>3</sub>) δ 7.82 (d, *J* = 6.5 Hz, 1H), 7.80 (s, 1H), 7.60 (d, *J* = 9.3 Hz, 1H), 7.17 (dd, *J* = 8.4, 5.3 Hz, 2H), 6.99 (d, *J* = 9.8 Hz, 1H), 6.93 – 6.87 (m, 2H), 6.74 (dd, *J* = 9.3, 6.4 Hz, 1H), 6.59 – 6.54 (m, 1H), 6.49 (d, *J* = 9.8 Hz, 1H), 3.76 (s, 3H), 1.46 (s, 9H).

**<sup>13</sup>C NMR** (126 MHz, CDCl<sub>3</sub>) δ 166.0, 161.7, 156.0, 138.9, 131.3, 127.8(2C), 125.3, 119.0, 118.5, 117.8, 116.4, 114.9(2C), 114.7, 113.0, 79.4, 51.8, 48.4, 28.7(3C).

**<sup>19</sup>F NMR** (470 MHz, CDCl<sub>3</sub>) δ -117.30.

**HRMS** [M+H]<sup>+</sup> calculated for C<sub>22</sub>H<sub>23</sub>FN<sub>2</sub>O<sub>4</sub>Na 421.1540 found 421.1537.

[α]<sub>D</sub><sup>25</sup> = 74.2 (*c* = 0.13, CH<sub>2</sub>Cl<sub>2</sub>).

**HPLC** analysis of the product: Daicel CHIRALPAK IC column; 5% <sup>i</sup>PrOH in hexanes; 1.0 mL/min; λ = 254 nm; retention times: 13.1 min (major), 22.1 min (minor).

**Methyl (*R*)-3-(((*tert*-butoxycarbonyl)amino)(4-fluorophenyl)methyl)indolizine-2-carboxylate 4d**

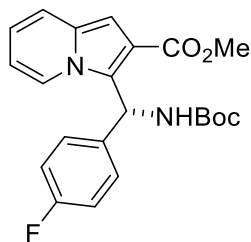

Colorless oil, 74 mg, 41% yield, 54% e.e..

**<sup>1</sup>H NMR** (500 MHz, CDCl<sub>3</sub>) δ 8.03 (d, *J* = 6.1 Hz, 1H), 7.40 (d, *J* = 9.1 Hz, 1H), 7.28 (bs, 1H), 7.11 (dd, *J* = 8.5, 5.3 Hz, 2H), 6.94 (d, *J* = 8.5 Hz, 2H), 6.92 (s, 1H), 6.76 – 6.68 (m, 2H), 6.64 – 6.58 (m, 1H), 3.81 (s, 3H), 1.45 (s, 9H).

**<sup>13</sup>C NMR** (126 MHz, CDCl<sub>3</sub>) δ 166.5, 162.1, 156.1, 136.3, 131.7, 127.9, 127.8(2C), 122.2, 120.7, 118.3, 116.8, 115.4(2C), 113.3, 102.3, 79.9, 51.9, 48.1, 28.6(3C).

**<sup>19</sup>F NMR** (470 MHz, CDCl<sub>3</sub>) δ -115.78.

**HRMS** [M+H]<sup>+</sup> calculated for C<sub>22</sub>H<sub>23</sub>FN<sub>2</sub>O<sub>4</sub>Na 421.1540 found 421.1544.

**HPLC** analysis of the product: Daicel CHIRALPAK IC column; 1% *i*PrOH in hexanes; 1.0 mL/min; λ = 254 nm; retention times: 10.3 min (major), 12.6 min (minor).

**Methyl (*R*)-1-(((*tert*-butoxycarbonyl)amino)(4-chlorophenyl)methyl)indolizine-2-carboxylate 3e**

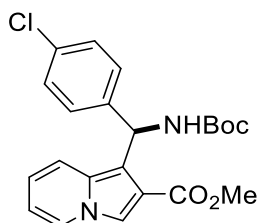

The two regioisomers **3e** and **4e** were prepared according to the **General Procedure A** (reaction time = 6 h). Purification by Flash chromatography (80:20 hexane/dichloromethane to 60:40 hexane/dichloromethane + 0.25% Et<sub>3</sub>N).

Colorless oil, 102 mg, 54% yield, 90% e.e..

**<sup>1</sup>H NMR** (500 MHz, CDCl<sub>3</sub>) δ 7.82 (d, *J* = 7.0 Hz, 1H), 7.80 (s, 1H), 7.60 (d, *J* = 9.3 Hz, 1H), 7.18 (d, *J* = 8.2 Hz, 2H), 7.14 (d, *J* = 8.2 Hz, 2H), 6.98 (d, *J* = 9.8 Hz, 1H), 6.75 (dd, *J* = 9.3, 6.5 Hz, 1H), 6.60 – 6.54 (m, 1H), 6.48 (d, *J* = 9.8 Hz, 1H), 3.77 (s, 3H), 1.46 (s, 9H).

**<sup>13</sup>C NMR** (126 MHz, CDCl<sub>3</sub>) δ 166.0, 156.0, 141.8, 132.3, 131.4, 128.2(2C), 127.6(2C), 125.3, 119.1, 118.4, 117.8, 116.4, 114.4, 113.0, 79.5, 51.8, 48.4, 28.7(3C).

**HRMS**  $[M+Na]^+$  calculated for  $C_{22}H_{23}N_2O_4ClNa$  437.1244 found 437.1248.

$[\alpha]^{25}_D = 91.5$  ( $c = 0.25$ ,  $CH_2Cl_2$ ).

**HPLC** analysis of the product: Daicel CHIRALCEL OD-H column; 10%  $i$ PrOH in hexanes; 1.0 mL/min;  $\lambda = 254$  nm; retention times: 8.3 min (minor), 19.3 min (major).

**Methyl (*R*)-3-(((*tert*-butoxycarbonyl)amino)(4-chlorophenyl)methyl)indolizine-2-carboxylate 4e**

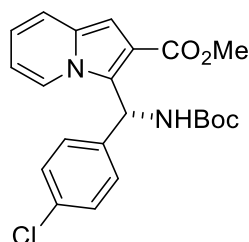

Colorless oil, 74 mg, 39% yield, 57% e.e..

**$^1H$  NMR** (200 MHz,  $CDCl_3$ )  $\delta$  8.04 (d,  $J = 7.3$  Hz, 1H), 7.40 (d,  $J = 8.9$  Hz, 1H), 7.28 – 7.17 (m, 3H), 7.07 (d,  $J = 8.4$  Hz, 2H), 6.91 (s, 1H), 6.78 – 6.66 (m, 2H), 6.66 – 6.57 (m, 1H), 3.80 (s, 3H), 1.45 (s, 9H).

**$^{13}C$  NMR** (126 MHz,  $CDCl_3$ )  $\delta$  166.4, 156.1, 139.2, 133.1, 131.8, 128.7(2C), 127.7, 127.6(2C), 122.2, 120.8, 118.3, 116.8, 113.4, 102.3, 80.0, 52.0, 48.1, 28.6(3C).

**HRMS**  $[M+Na]^+$  calculated for  $C_{22}H_{23}N_2O_4ClNa$  437.1244 found 437.1242.

**HPLC** analysis of the product: Daicel CHIRALCEL OD-H column; 0.3%  $i$ PrOH in hexanes; 1.0 mL/min;  $\lambda = 254$  nm; retention times: 22.5 min (minor), 26.0 min (major).

**Methyl (*R*)-1-((4-bromophenyl)((*tert*-butoxycarbonyl)amino)methyl)indolizine-2-carboxylate 3f**

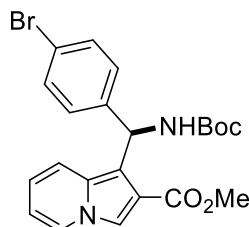

The two regioisomers **3f** and **4f** were prepared according to the **General Procedure A** (reaction time = 6 h). Purification by Flash chromatography (90:10 hexane/dichloromethane to 80:20 hexane/dichloromethane + 0.25%  $Et_3N$ ).

Colorless oil, 113 mg, 54% yield, 93% e.e..

**<sup>1</sup>H NMR** (500 MHz, CDCl<sub>3</sub>) δ 7.82 (d, *J* = 7.0 Hz, 1H), 7.80 (s, 1H), 7.59 (d, *J* = 9.3 Hz, 1H), 7.33 (d, *J* = 8.1 Hz, 2H), 7.09 (d, *J* = 8.1 Hz, 2H), 6.98 (d, *J* = 9.8 Hz, 1H), 6.75 (dd, *J* = 9.3, 6.9 Hz, 1H), 6.60-6.54 (m, 1H), 6.46 (d, *J* = 9.8 Hz, 1H), 3.76 (s, 3H), 1.46 (s, 9H).

**<sup>13</sup>C NMR** (126 MHz, CDCl<sub>3</sub>) δ 165.9, 156.0, 142.3, 131.4, 131.2(2C), 128.0(2C), 125.3, 120.4, 119.1, 118.4, 117.8, 116.4, 114.3, 113.0, 79.5, 51.8, 48.5, 28.6(3C).

**HRMS** [M+Na]<sup>+</sup> calculated for C<sub>22</sub>H<sub>23</sub>N<sub>2</sub>O<sub>4</sub>BrNa 481.0739 found 481.0737.

[α]<sub>D</sub><sup>25</sup> = 55.8 (*c* = 0.29, CH<sub>2</sub>Cl<sub>2</sub>).

**HPLC** analysis of the product: Daicel CHIRALPAK IC column; 5% *i*PrOH in hexanes; 1.0 mL/min; λ = 254 nm; retention times: 13.2 min (major), 20.4 min (minor).

**Methyl (*R*)-3-((4-bromophenyl)((*tert*-butoxycarbonyl)amino)methyl)indolizine-2-carboxylate 4f**

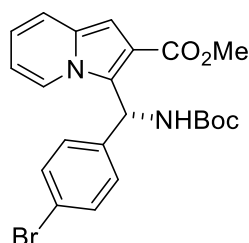

Colorless oil, 90 mg, 43% yield, 60% e.e..

**<sup>1</sup>H NMR** (500 MHz, CDCl<sub>3</sub>) δ 8.04 (d, *J* = 7.8 Hz, 1H), 7.40 (d, *J* = 9.1 Hz, 1H), 7.36 (d, *J* = 8.2 Hz, 2H), 7.24 (bs, 1H), 7.02 (d, *J* = 8.2 Hz, 2H), 6.91 (s, 1H), 6.73 (dd, *J* = 9.1, 6.7 Hz, 1H), 6.69 (d, *J* = 9.8 Hz, 1H), 6.65 – 6.58 (m, 1H), 3.81 (s, 3H), 1.45 (s, 9H).

**<sup>13</sup>C NMR** (126 MHz, cdcl<sub>3</sub>) δ 166.4, 156.1, 139.7, 131.8, 131.6(2C), 127.9(2C), 127.6, 122.2, 121.3, 120.8, 118.3, 116.8, 113.4, 102.3, 80.0, 52.0, 48.2, 28.6(3C).

**HRMS** [M+Na]<sup>+</sup> calculated for C<sub>22</sub>H<sub>23</sub>N<sub>2</sub>O<sub>4</sub>BrNa 481.0739 found 481.0735.

**HPLC** analysis of the product: Daicel CHIRALCEL OD-H column; 0.3% *i*PrOH in hexanes; 1.0 mL/min; λ = 254 nm; retention times: 22.2 min (minor), 25.6 min (major).

**Methyl (*R*)-1-(((*tert*-butoxycarbonyl)amino)(4-iodophenyl)methyl)indolizine-2-carboxylate 3g**

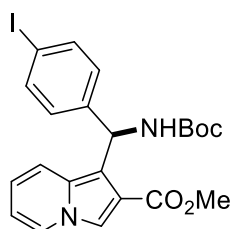

The two regioisomers **3g** and **4g** were prepared according to the **General Procedure A** (reaction time = 48 h). Purification by Flash chromatography (80:20 hexane/dichloromethane to 60:40 hexane/dichloromethane + 0.25% Et<sub>3</sub>N).

Colorless oil, 97 mg, 42% yield, 90% e.e..

**<sup>1</sup>H NMR** (600 MHz, CDCl<sub>3</sub>) δ 7.81 (d, *J* = 7.0 Hz, 1H), 7.79 (s, 1H), 7.59 (d, *J* = 9.2 Hz, 1H), 7.53 (d, *J* = 8.4 Hz, 2H), 7.01 – 6.98 (m, 1H), 6.97 (d, *J* = 8.4 Hz, 2H), 6.75 (ddd, *J* = 9.2, 6.4, 1.0 Hz, 1H), 6.59 – 6.54 (m, 1H), 6.45 (d, *J* = 9.9 Hz, 1H), 3.77 (s, 3H), 1.45 (s, 9H).

**<sup>13</sup>C NMR** (126 MHz, CDCl<sub>3</sub>) δ 166.0, 156.0, 143.1, 137.1(2C), 131.4, 128.3(2C), 125.3, 119.1, 118.4, 117.8, 116.4, 114.2, 113.0, 92.0, 79.5, 51.8, 48.6, 28.6(3C).

**HRMS** [M+Na]<sup>+</sup> calculated for C<sub>22</sub>H<sub>23</sub>N<sub>2</sub>O<sub>4</sub>INa 529.0600 found 529.0595.

[α]<sup>25</sup><sub>D</sub> = 48.0 (*c* = 0.26, CH<sub>2</sub>Cl<sub>2</sub>).

**HPLC** analysis of the product: Daicel CHIRALPAK IC column; 5% *i*PrOH in hexanes; 1.0 mL/min; λ = 254 nm; retention times: 14.0 min (major), 20.8 min (minor).

**Methyl (*R*)-3-(((*tert*-butoxycarbonyl)amino)(4-iodophenyl)methyl)indolizine-2-carboxylate **4g****

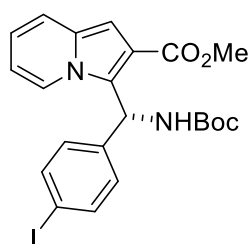

Colorless oil, 103 mg, 45% yield, 67% e.e..

**<sup>1</sup>H NMR** (200 MHz, CDCl<sub>3</sub>) δ 8.03 (d, *J* = 7.3 Hz, 1H), 7.56 (d, *J* = 8.4 Hz, 2H), 7.40 (d, *J* = 8.9 Hz, 1H), 7.20 (bs, 1H), 6.95 – 6.84 (m, 3H), 6.80 – 6.57 (m, 3H), 3.81 (s, 3H), 1.45 (s, 9H).

**<sup>13</sup>C NMR** (126 MHz, CDCl<sub>3</sub>) δ 166.4, 156.1, 140.5, 137.6(2C), 131.8, 128.2(2C), 127.5, 122.2, 120.8, 118.3, 116.8, 113.4, 102.3, 92.9, 80.0, 52.0, 48.3, 28.6(3C).

**HRMS** [M+Na]<sup>+</sup> calculated for C<sub>22</sub>H<sub>23</sub>N<sub>2</sub>O<sub>4</sub>INa 529.0600 found 529.0599.

**HPLC** analysis of the product: Daicel CHIRALPAK IC column; 1% *i*PrOH in hexanes; 1.0 mL/min; λ = 254 nm; retention times: 11.8 min (major), 14.3 min (minor).

**Methyl (*R*)-1-([1,1'-biphenyl]-4-yl)((*tert*-butoxycarbonyl)amino)methylindolizine-2-carboxylate**  
**3h**

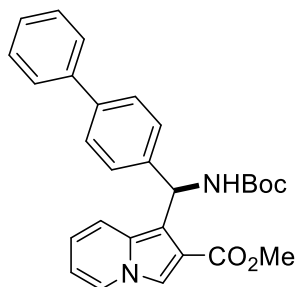

The two regioisomers **3h** and **4h** were prepared according to the **General Procedure A** (reaction time = 24 h). Purification by Flash chromatography (75:25 hexane/dichloromethane to 70:30 hexane/dichloromethane + 0.25% Et<sub>3</sub>N).

Colorless oil, 83 mg, 40% yield, 96% e.e..

**<sup>1</sup>H NMR** (600 MHz, CDCl<sub>3</sub>) δ 7.85 – 7.80 (m, 2H), 7.65 (d, *J* = 9.3 Hz, 1H), 7.54 (d, *J* = 7.6 Hz, 2H), 7.47 (d, *J* = 8.0 Hz, 2H), 7.42 – 7.37 (m, 2H), 7.34 – 7.27 (m, 3H), 7.09 (d, *J* = 9.8 Hz, 1H), 6.75 (dd, *J* = 9.3, 6.5 Hz, 1H), 6.61 – 6.54 (m, 2H), 3.78 (s, 3H), 1.48 (s, 9H).

**<sup>13</sup>C NMR** (151 MHz, CDCl<sub>3</sub>) δ 166.0, 156.1, 142.3, 141.2, 139.4, 131.4, 128.8(2C), 127.1, 127.1(2C), 126.9(2C), 126.6(2C), 125.3, 118.8, 118.6, 117.7, 116.5, 114.8, 113.0, 79.3, 51.8, 48.8, 28.7(3C).

**HRMS** [M+Na]<sup>+</sup> calculated for C<sub>28</sub>H<sub>28</sub>N<sub>2</sub>O<sub>4</sub>Na 479.1947 found 479.1950.

[α]<sub>D</sub><sup>25</sup> = 46.2 (*c* = 0.26, CH<sub>2</sub>Cl<sub>2</sub>).

**HPLC** analysis of the product: Daicel CHIRALCEL OD-H column; 10% *i*PrOH in hexanes; 1.0 mL/min; λ = 254 nm; retention times: 13.9 min (minor), 27.7min (major).

**Methyl (*R*)-3-([1,1'-biphenyl]-4-yl)((*tert*-butoxycarbonyl)amino)methylindolizine-2-carboxylate**  
**4h**

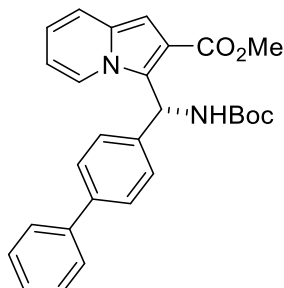

Colorless oil, 96 mg, 46% yield, 51% e.e..



**<sup>1</sup>H NMR** (600 MHz, CDCl<sub>3</sub>) δ 8.10 (d, *J* = 7.0 Hz, 1H), 7.54 (d, *J* = 7.7 Hz, 2H), 7.49 (d, *J* = 8.1 Hz, 2H), 7.44 – 7.38 (m, 3H), 7.37 – 7.29 (m, 2H), 7.24 (d, *J* = 8.1 Hz, 2H), 6.95 (s, 1H), 6.81 (d, *J* = 9.4 Hz, 1H), 6.74 (ddd, *J* = 9.1, 6.4, 0.9 Hz, 1H), 6.65 – 6.59 (m, 1H), 3.83 (s, 3H), 1.48 (s, 9H).

**<sup>13</sup>C NMR** (151 MHz, CDCl<sub>3</sub>) δ 166.5, 156.2, 140.9, 140.2, 139.6, 131.7, 128.8(2C), 128.1, 127.3, 127.3(2C), 127.1(2C), 126.6(2C), 122.4, 120.7, 118.2, 116.8, 113.2, 102.3, 79.8, 51.9, 48.5, 28.6(3C).

**HRMS** [M+Na]<sup>+</sup> calculated for C<sub>28</sub>H<sub>28</sub>N<sub>2</sub>O<sub>4</sub>Na 479.1947 found 479.1950.

**HPLC** analysis of the product: Daicel CHIRALCEL OD-H column; 0.3% *i*PrOH in hexanes; 1.0 mL/min; λ = 254 nm; retention times: 45.9 min (minor), 55.3 min (major).

**Methyl (*R*)-1-(((tert-butoxycarbonyl)amino)(4-methoxyphenyl)methyl)indolizine-2-carboxylate**  
**3i**

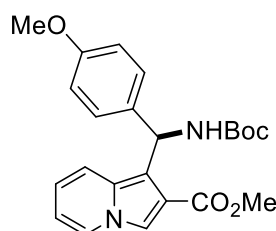

The two regioisomers **3i** and **4i** were prepared according to the **General Procedure A** (reaction time = 4 h). Purification by Flash chromatography (50:50 hexane/dichloromethane to 30:70 hexane/dichloromethane + 0.25% Et<sub>3</sub>N).

Colorless oil, 48 mg, 26% yield, 68% e.e..

**<sup>1</sup>H NMR** (500 MHz, CDCl<sub>3</sub>) δ 7.80 (m, 2H), 7.60 (d, *J* = 9.2 Hz, 1H), 7.13 (d, *J* = 8.4 Hz, 2H), 7.00 (d, *J* = 9.7 Hz, 1H), 6.76 (d, *J* = 8.4 Hz, 2H), 6.71 (ddd, *J* = 9.2, 6.5, 1.1 Hz, 1H), 6.58 – 6.52 (m, 1H), 6.48 (d, *J* = 9.7 Hz, 1H), 3.77 (s, 3H), 3.75 (s, 3H), 1.46 (s, 9H).

**<sup>13</sup>C NMR** (126 MHz, CDCl<sub>3</sub>) δ 166.0, 158.3, 156.0, 135.4, 131.2, 127.3(2C), 125.2, 118.7, 118.7, 117.7, 116.5, 115.1, 113.5(2C), 112.9, 79.2, 55.3, 51.7, 48.5, 28.7(3C).

**HRMS** [M+Na]<sup>+</sup> calculated for C<sub>23</sub>H<sub>26</sub>N<sub>2</sub>O<sub>5</sub>Na 433.1739 found 433.1742.

[α]<sub>D</sub><sup>25</sup> = 28.8 (*c* = 0.26, CH<sub>2</sub>Cl<sub>2</sub>).

**HPLC** analysis of the product: Daicel CHIRALCEL OD-H column; 20% *i*PrOH in hexanes; 1.0 mL/min; λ = 254 nm; retention times: 9.6 min (minor), 14.2 min (major).

**Methyl (*R*)-3-(((tert-butoxycarbonyl)amino)(4-methoxyphenyl)methyl)indolizine-2-carboxylate**  
**4i**

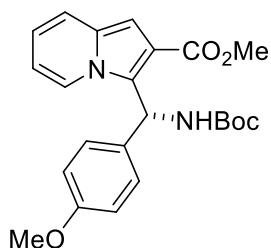

Colorless oil, 131 mg, 70% yield, 21% e.e..

**<sup>1</sup>H NMR** (500 MHz, CDCl<sub>3</sub>) δ 8.01 (d, *J* = 7.6 Hz, 1H), 7.39 (d, *J* = 9.0 Hz, 1H), 7.30 (bs, 1H), 7.08 (d, *J* = 8.5 Hz, 2H), 6.91 (s, 1H), 6.78 (d, *J* = 8.5 Hz, 2H), 6.74 – 6.65 (m, 2H), 6.61 – 6.55 (m, 1H), 3.82 (s, 3H), 3.75 (s, 3H), 1.45 (s, 9H).

**<sup>13</sup>C NMR** (126 MHz, CDCl<sub>3</sub>) δ 166.6, 158.9, 156.1, 132.6, 131.6, 128.3, 127.4(2C), 122.4, 120.7, 118.1, 116.8, 114.0(2C), 113.1, 102.2, 79.7, 55.4, 51.9, 48.4, 28.6(3C).

**HRMS** [M+Na]<sup>+</sup> calculated for C<sub>23</sub>H<sub>26</sub>N<sub>2</sub>O<sub>5</sub>Na 433.1739 found 433.1738.

**HPLC** analysis of the product: Daicel CHIRALCEL OD-H column; 1% <sup>i</sup>PrOH in hexanes; 1.0 mL/min; λ = 254 nm; retention times: 27.5 min (minor), 31.2 min (major).

**Methyl (*R*)-1-(((tert-butoxycarbonyl)amino)(*m*-tolyl)methyl)indolizine-2-carboxylate 3j**

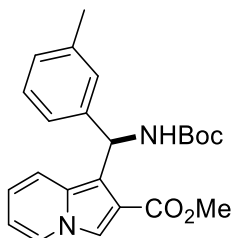

The two regioisomers **3j** and **4j** were prepared according to the **General Procedure A** (reaction time = 4 h). Purification by Flash chromatography (60:40 hexane/dichloromethane to 40:60 hexane/dichloromethane + 0.25% Et<sub>3</sub>N).

Colorless oil, 86 mg, 48% yield, 92% e.e..

**<sup>1</sup>H NMR** (600 MHz, CDCl<sub>3</sub>) δ 7.83 – 7.78 (m, 2H), 7.61 (d, *J* = 9.3 Hz, 1H), 7.14 – 7.09 (m, 1H), 7.05 – 6.99 (m, 3H), 6.97 (d, *J* = 9.9 Hz, 1H), 6.72 (dd, *J* = 9.3, 6.4 Hz, 1H), 6.58 – 6.54 (m, 1H), 6.49 (d, *J* = 9.9 Hz, 1H), 3.76 (s, 3H), 2.27 (s, 3H), 1.46 (s, 9H).

**<sup>13</sup>C NMR** (151 MHz, CDCl<sub>3</sub>) δ 166.0, 156.1, 143.1, 137.6, 131.4, 128.0, 127.4, 127.0, 125.2, 123.2, 118.7(2C), 117.7, 116.5, 115.0, 112.9, 79.2, 51.7, 48.9, 28.7, 21.7(3C).

**HRMS**  $[M+Na]^+$  calculated for  $C_{23}H_{26}N_2O_4Na$  417.1790 found 417.1788.

$[\alpha]^{25}_D = 59.4$  ( $c = 0.25$ ,  $CH_2Cl_2$ ).

**HPLC** analysis of the product: Daicel CHIRALCEL OD-H column; 10%  $i$ PrOH in hexanes; 1.0 mL/min;  $\lambda = 254$  nm; retention times: 8.3 min (minor), 16.4 min (major).

**Methyl (R)-3-(((*tert*-butoxycarbonyl)amino)(*m*-tolyl)methyl)indolizine-2-carboxylate 4j**

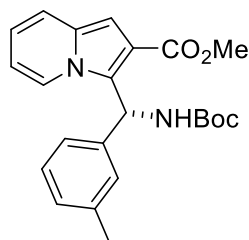

Colorless oil, 70 mg, 39% yield, 39% e.e..

**$^1H$  NMR** (600 MHz,  $CDCl_3$ )  $\delta$  8.08 – 8.00 (m, 1H), 7.40 (d,  $J = 9.1$  Hz, 1H), 8.25 (bs, 1H), 7.16 – 7.11 (m, 1H), 7.02 (d,  $J = 7.5$  Hz, 1H), 6.98 (s, 1H), 6.94 – 6.90 (m, 2H), 6.74 – 6.68 (m, 2H), 6.62 – 6.57 (m, 1H), 3.81 (s, 3H), 2.27 (s, 3H), 1.45 (s, 9H).

**$^{13}C$  NMR** (151 MHz,  $CDCl_3$ )  $\delta$  166.5, 156.2, 140.4, 138.2, 131.6, 128.5, 128.3, 128.2, 126.9, 123.2, 122.4, 120.7, 118.1, 116.8, 113.1, 102.2, 79.7, 51.9, 48.7, 28.6, 21.7(3C).

**HRMS**  $[M+Na]^+$  calculated for  $C_{23}H_{26}N_2O_4Na$  417.1790 found 417.1789.

**HPLC** analysis of the product: Daicel CHIRALCEL OD-H column; 1%  $i$ PrOH in hexanes; 1.0 mL/min;  $\lambda = 254$  nm; retention times: 12.0 min (minor), 14.7 min (major).

**Methyl (R)-1-((3-bromophenyl)((*tert*-butoxycarbonyl)amino)methyl)indolizine-2-carboxylate 3k**

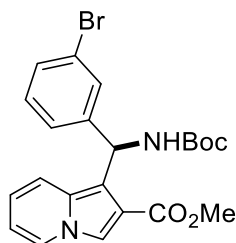

The two regioisomers **3k** and **4k** were prepared according to the **General Procedure A** (reaction time = 22 h). Purification by Flash chromatography (50:50 hexane/dichloromethane to 40:60 hexane/dichloromethane + 0.25%  $Et_3N$ ).

Colorless oil, 111 mg, 53% yield, 85% e.e..

**<sup>1</sup>H NMR** (500 MHz, CDCl<sub>3</sub>) δ 7.83 (d, *J* = 7.0 Hz, 1H), 7.81 (s, 1H), 7.59 (d, *J* = 9.3 Hz, 1H), 7.32 (s, 1H), 7.28 (d, *J* = 7.9 Hz, 1H), 7.16 (d, *J* = 7.8 Hz, 1H), 7.12 – 7.06 (m, 1H), 6.95 (d, *J* = 9.8 Hz, 1H), 6.76 (dd, *J* = 9.3, 6.5 Hz, 1H), 6.61 – 6.54 (m, 1H), 6.49 (d, *J* = 9.8 Hz, 1H), 3.77 (s, 3H), 1.46 (s, 9H).

**<sup>13</sup>C NMR** (126 MHz, CDCl<sub>3</sub>) δ 165.9, 156.0, 145.6, 131.5, 129.7(2C), 129.4, 125.3, 124.9, 122.4, 119.1, 118.4, 117.8, 116.4, 114.0, 113.1, 79.5, 51.8, 48.5, 28.6(3C).

**HRMS** [M+Na]<sup>+</sup> calculated for C<sub>22</sub>H<sub>23</sub>N<sub>2</sub>O<sub>4</sub>BrNa 481.0739 found 481.0740.

[α]<sub>D</sub><sup>25</sup> = 59.9 (*c* = 0.24, CH<sub>2</sub>Cl<sub>2</sub>).

**HPLC** analysis of the product: Daicel CHIRALCEL OD-H column; 10% <sup>i</sup>PrOH in hexanes; 1.0 mL/min; λ = 254 nm; retention times: 8.4 min (minor), 17.1 min (major).

**Methyl (*R*)-3-((3-bromophenyl)((*tert*-butoxycarbonyl)amino)methyl)indolizine-2-carboxylate 4k**

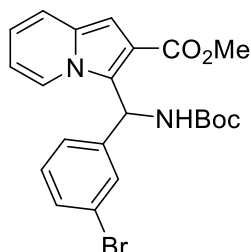

Colorless oil, 83 mg, 40% yield, 41% e.e..

**<sup>1</sup>H NMR** (500 MHz, CDCl<sub>3</sub>) δ 8.05 (d, *J* = 7.2 Hz, 1H), 7.41 (d, *J* = 9.1 Hz, 1H), 7.37 – 7.29 (m, 2H), 7.18 (bs, 1H), 7.14 – 7.08 (m, 1H), 7.04 (d, *J* = 7.9 Hz, 1H), 6.92 (s, 1H), 6.78 – 6.70 (m, 2H), 6.78 – 6.70 (m, 1H), 3.81 (s, 3H), 1.46 (s, 9H).

**<sup>13</sup>C NMR** (126 MHz, CDCl<sub>3</sub>) δ 166.4, 156.1, 143.0, 131.8, 130.5, 130.1, 129.2, 127.3, 124.8, 122.8, 122.2, 120.8, 118.4, 116.9, 113.4, 102.4, 80.1, 51.9, 48.2, 28.6(3C).

**HRMS** [M+Na]<sup>+</sup> calculated for C<sub>22</sub>H<sub>23</sub>N<sub>2</sub>O<sub>4</sub>BrNa 481.0739 found 481.0743.

**HPLC** analysis of the product: Daicel CHIRALCEL OD-H column; 0.3% <sup>i</sup>PrOH in hexanes; 1.0 mL/min; λ = 254 nm; retention times: 18.2 min (minor), 25.2 min (major).

**Methyl (*R*)-1-(((*tert*-butoxycarbonyl)amino)(furan-2-yl)methyl)indolizine-2-carboxylate 3l**

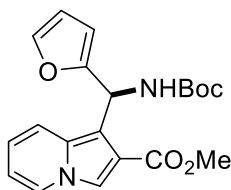

The two regioisomers **3l** and **4l** were prepared according to the **General Procedure A** (reaction time = 3 h). Purification by Flash chromatography (70:30 hexane/dichloromethane to 40:60 hexane/dichloromethane + 0.25% Et<sub>3</sub>N).

Colorless oil, 88 mg, 52% yield, 87% e.e..

**<sup>1</sup>H NMR** (500 MHz, CDCl<sub>3</sub>) δ 7.83 – 7.77 (m, 2H), 7.57 (d, *J* = 9.3 Hz, 1H), 7.28 – 7.24 (m, 1H), 6.96 (d, *J* = 9.8 Hz, 1H), 6.73 (dd, *J* = 9.3, 6.4 Hz, 1H), 6.58 – 6.49 (m, 2H), 6.26 – 6.21 (m, 1H), 6.06 – 5.99 (m, 1H), 3.83 (s, 3H), 1.45 (s, 9H).

**<sup>13</sup>C NMR** (126 MHz, CDCl<sub>3</sub>) δ 166.0, 155.8, 155.5, 141.6, 131.3, 125.3, 118.9, 118.5, 117.5, 116.9, 112.9, 112.2, 110.3, 105.6, 79.4, 51.8, 44.5, 28.6(3C).

**HRMS** [M+Na]<sup>+</sup> calculated for C<sub>20</sub>H<sub>22</sub>N<sub>2</sub>O<sub>5</sub>Na 393.1426 found 393.1424.

[α]<sup>25</sup><sub>D</sub> = -14 (*c* = 0.25, CH<sub>2</sub>Cl<sub>2</sub>).

**HPLC** analysis of the product: Daicel CHIRALCEL OD-H column; 10% *i*PrOH in hexanes; 1.0 mL/min; λ = 254 nm; retention times: 10.6 min (minor), 19.8 min (major).

**Methyl (*R*)-3-(((*tert*-butoxycarbonyl)amino)(furan-2-yl)methyl)indolizine-2-carboxylate **4l****

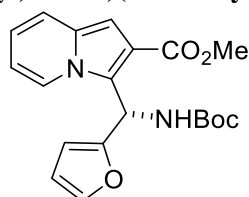

Colorless oil, 75 mg, 44% yield, 6% e.e..

**<sup>1</sup>H NMR** (600 MHz, CDCl<sub>3</sub>) δ 8.12 (d, *J* = 7.3 Hz, 1H), 7.38 (d, *J* = 9.1 Hz, 1H), 7.29 – 7.27 (m, 1H), 7.26 (bs, 1H), 6.89 (s, 1H), 6.81 – 6.74 (m, 1H), 6.72 (ddd, *J* = 9.1, 6.4, 1.0 Hz, 1H), 6.64 – 6.59 (m, 1H), 6.25 (dd, *J* = 3.3, 1.8 Hz, 1H), 6.09 – 6.04 (m, 1H), 3.86 (s, 3H), 1.44 (s, 9H).

**<sup>13</sup>C NMR** (151 MHz, CDCl<sub>3</sub>) δ 166.4, 155.8, 152.8, 142.2, 131.8, 125.5, 122.7, 120.6, 118.3, 117.1, 113.0, 110.5, 106.4, 102.2, 80.0, 51.9, 44.2, 28.5(3C).

**HRMS** [M+Na]<sup>+</sup> calculated for C<sub>20</sub>H<sub>22</sub>N<sub>2</sub>O<sub>5</sub>Na 393.1426 found 393.1429.

**HPLC** analysis of the product: Daicel CHIRALCEL OD-H column; 10% *i*PrOH in hexanes; 1.0 mL/min; λ = 254 nm; retention times: 15.6 min (minor), 19.9 min (major).

**Methyl (*R*)-1-(((*tert*-butoxycarbonyl)amino)(thiophen-2-yl)methyl)indolizine-2-carboxylate **3m****

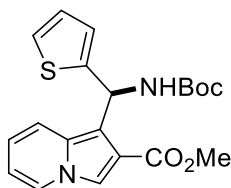

The two regioisomers **3m** and **4m** were prepared according to the **General Procedure A** (reaction time = 6 h). Purification by Flash chromatography (80:20 hexane/dichloromethane to 70:30 hexane/dichloromethane + 0.25% Et<sub>3</sub>N).

Colorless oil, 81 mg, 46% yield, 89% e.e..

**<sup>1</sup>H NMR** (500 MHz, CDCl<sub>3</sub>) δ 7.84 – 7.80 (m, 2H), 7.59 (d, *J* = 9.3 Hz, 1H), 7.17 (d, *J* = 9.8 Hz, 1H), 7.09 (d, *J* = 5.0 Hz, 1H), 6.87 – 6.82 (m, 1H), 6.74 (dd, *J* = 9.3, 6.5 Hz, 1H), 6.71 – 6.65 (m, 2H), 6.59 – 6.55 (m, 1H), 3.80 (s, 3H), 1.46 (s, 9H).

**<sup>13</sup>C NMR** (126 MHz, CDCl<sub>3</sub>) δ 166.0, 155.8, 148.7, 131.1, 126.7, 125.3, 124.0, 123.7, 119.0, 118.4, 117.7, 116.7, 114.3, 113.0, 79.5, 51.8, 46.0, 28.6(3C).

**HRMS** [M+Na]<sup>+</sup> calculated for C<sub>20</sub>H<sub>22</sub>N<sub>2</sub>O<sub>4</sub>SNa 409.1198 found 409.1199.

[α]<sub>D</sub><sup>25</sup> = 22.0 (*c* = 0.28, CH<sub>2</sub>Cl<sub>2</sub>).

**HPLC** analysis of the product: Daicel CHIRALPAK AD-H column; 10% *i*PrOH in hexanes; 1.0 mL/min; λ = 254 nm; retention times: 13.2 min (minor), 21.5 min (major).

**Methyl (*R*)-3-(((*tert*-butoxycarbonyl)amino)(thiophen-2-yl)methyl)indolizine-2-carboxylate **4m****

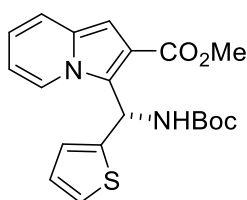

Colorless oil, 86 mg, 49% yield, 15% e.e..

**<sup>1</sup>H NMR** (500 MHz, CDCl<sub>3</sub>) δ 8.04 (d, *J* = 5.4 Hz, 1H), 7.47 (bs, 1H), 7.40 (d, *J* = 9.1 Hz, 1H), 7.15 (d, *J* = 5.0 Hz, 1H), 6.92 (s, 1H), 6.92 – 6.87 (m, 1H), 6.85 (dd, *J* = 5.0, 3.6 Hz, 1H), 6.73 (ddd, *J* = 9.1, 6.5, 1.0 Hz, 1H), 6.66 (d, *J* = 3.6 Hz, 1H), 6.64 – 6.57 (m, 1H), 3.85 (s, 3H), 1.45 (s, 9H).

**<sup>13</sup>C NMR** (126 MHz, CDCl<sub>3</sub>) δ 166.5, 155.8, 145.0, 131.7, 127.3, 126.9, 124.8, 124.4, 122.4, 120.7, 118.3, 116.9, 113.2, 102.3, 80.0, 52.0, 45.7, 28.6(3C).

**HRMS** [M+Na]<sup>+</sup> calculated for C<sub>20</sub>H<sub>22</sub>N<sub>2</sub>O<sub>4</sub>SNa 409.1198 found 409.1200.

**HPLC** analysis of the product: Daicel CHIRALPAK AD-H column; 5% *i*PrOH in hexanes; 1.0 mL/min;  $\lambda$  = 254 nm; retention times: 18.0 min (major), 20.0 min (minor).

**Methyl (*R*)-1-(((*tert*-butoxycarbonyl)amino)(4-fluorophenyl)methyl)-6-chloroindolizine-2-carboxylate **3n****

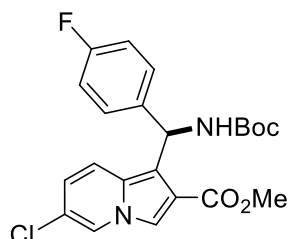

The two regioisomers **3n** and **4n** were prepared according to the **General Procedure A** (reaction time = 18 h). Purification by Flash chromatography (65:35 hexane/dichloromethane + 0.25% Et<sub>3</sub>N).

Colorless oil, 52 mg, 26% yield, 91% e.e..

**<sup>1</sup>H NMR** (500 MHz, CDCl<sub>3</sub>)  $\delta$  7.87 (s, 1H), 7.77 (s, 1H), 7.56 (d, *J* = 9.7 Hz, 1H), 7.14 (dd, *J* = 8.4, 5.3 Hz, 2H), 6.95 – 6.87 (m, 3H), 6.71 (dd, *J* = 9.7, 1.7 Hz, 1H), 6.45 (d, *J* = 9.8 Hz, 1H), 3.76 (s, 3H), 1.45 (s, 9H).

**<sup>13</sup>C NMR** (126 MHz, CDCl<sub>3</sub>)  $\delta$  165.5, 161.8, 156.0, 138.4, 129.7, 127.7(2C), 122.8, 121.55, 120.7, 119.1, 118.0, 117.1, 116.1, 115.0(2C), 79.6, 51.9, 48.4, 28.6(3C).

**<sup>19</sup>F NMR** (470 MHz, CDCl<sub>3</sub>)  $\delta$  -116.92.

**HRMS** [M+Na]<sup>+</sup> calculated for C<sub>22</sub>H<sub>22</sub>N<sub>2</sub>O<sub>4</sub>FCINa 455.1150 found 455.1157.

$[\alpha]^{25}_D$  = 42.3 (*c* = 0.16, CH<sub>2</sub>Cl<sub>2</sub>).

**HPLC** analysis of the product: Daicel CHIRALCEL OD-H column; 1% *i*PrOH in hexanes; 1.0 mL/min;  $\lambda$  = 254 nm; retention times: 17.4 min (minor), 20.6 min (major).

**Methyl (*R*)-3-(((*tert*-butoxycarbonyl)amino)(4-fluorophenyl)methyl)-6-chloroindolizine-2-carboxylate **4n****

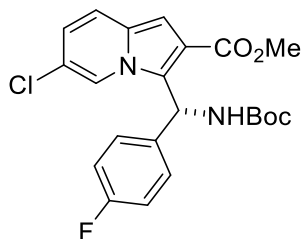

Colorless oil, 143 mg, 72% yield, 81% e.e..

**<sup>1</sup>H NMR** (500 MHz, CDCl<sub>3</sub>) δ 8.07 (s, 1H), 7.35 (d, *J* = 9.5 Hz, 1H), 7.29 – 7.224 (m, 1H), 7.11 (dd, *J* = 8.4, 5.2 Hz, 2H), 6.98 – 6.92 (m, 3H), 6.70 (dd, *J* = 9.5, 1.6 Hz, 1H), 6.63 (d, *J* = 9.6 Hz, 1H), 3.81 (s, 3H), 1.46 (s, 9H).

**<sup>13</sup>C NMR** (126 MHz, CDCl<sub>3</sub>) δ 166.1, 162.2, 156.0, 135.8, 129.9, 128.5, 127.9(2C), 122.1, 121.2, 120.1, 119.9, 117.5, 115.5(2C), 103.8, 80.1, 52.0, 48.3, 28.6(3C).

**<sup>19</sup>F NMR** (470 MHz, CDCl<sub>3</sub>) δ -115.30.

**HRMS** [M+Na]<sup>+</sup> calculated for C<sub>22</sub>H<sub>22</sub>N<sub>2</sub>O<sub>4</sub>FCINa 455.1150 found 455.1154.

**HPLC** analysis of the product: Daicel CHIRALPAK AD-H column; 1% <sup>i</sup>PrOH in hexanes; 1.0 mL/min; λ = 254 nm; retention times: 13.2 min (minor), 17.4 min (major).

**Methyl (*R*)-1-((4-bromophenyl)((*tert*-butoxycarbonyl)amino)methyl)-6-chloroindolizine-2-carboxylate **3o****

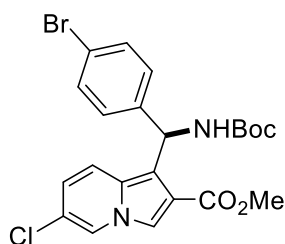

The two regioisomers **3o** and **4o** were prepared according to the **General Procedure A** (reaction time = 24 h). Purification by Flash chromatography (65:35 hexane/dichloromethane + 0.25% Et<sub>3</sub>N).

Colorless oil, 68 mg, 30% yield, 92% e.e..

**<sup>1</sup>H NMR** (500 MHz, CDCl<sub>3</sub>) δ 7.87 (s, 1H), 7.76 (s, 1H), 7.56 (d, *J* = 9.7 Hz, 1H), 7.34 (d, *J* = 8.3 Hz, 2H), 7.06 (d, *J* = 8.3 Hz, 2H), 6.91 (d, *J* = 9.8 Hz, 1H), 6.72 (dd, *J* = 9.7, 1.7 Hz, 1H), 6.42 (d, *J* = 9.8 Hz, 1H), 3.76 (s, 3H), 1.45 (s, 9H).

**<sup>13</sup>C NMR** (151 MHz, CDCl<sub>3</sub>) δ 165.5, 156.0, 141.8, 131.2(2C), 129.8, 128.0(2C), 122.8, 121.6, 120.8, 120.6, 119.0, 118.0, 117.0, 115.8, 79.6, 51.9, 48.5, 28.6(3C).

**HRMS** [M+Na]<sup>+</sup> calculated for C<sub>22</sub>H<sub>22</sub>N<sub>2</sub>O<sub>4</sub>ClBrNa 515.0349 found 515.0340.

[α]<sub>D</sub><sup>25</sup> = 175.1 (*c* = 0.10, CH<sub>2</sub>Cl<sub>2</sub>).

**HPLC** analysis of the product: Daicel CHIRALCEL OD-H column; 2% <sup>i</sup>PrOH in hexanes; 1.0 mL/min; λ = 254 nm; retention times: 13.4 min (minor), 15.8 min (major).



**Methyl (*R*)-3-((4-bromophenyl)((*tert*-butoxycarbonyl)amino)methyl)-6-chloroindolizine-2-carboxylate 4o**

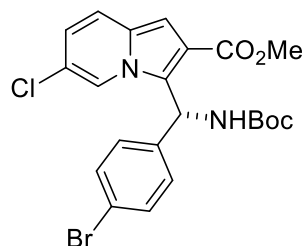

Colorless oil, 144 mg, 64% yield, 82% e.e..

**<sup>1</sup>H NMR** (500 MHz, CDCl<sub>3</sub>) δ 8.09 (s, 1H), 7.38 (d, *J* = 8.3 Hz, 2H), 7.36 (d, *J* = 9.5 Hz, 1H), 7.24 (bs, 1H), 7.01 (d, *J* = 8.3 Hz, 2H), 6.96 (s, 1H), 6.70 (dd, *J* = 9.5, 1.6 Hz, 1H), 6.60 (d, *J* = 9.6 Hz, 1H), 3.81 (s, 3H), 1.46 (s, 9H).

**<sup>13</sup>C NMR** (50 MHz, CDCl<sub>3</sub>) δ 166.0, 156.0, 139.1, 131.7(2C), 129.9, 128.2, 127.9(2C), 122.1, 121.5, 121.2, 120.1, 119.9, 117.5, 103.8, 80.2, 52.0, 48.3, 28.5(3C).

**HRMS** [M+Na]<sup>+</sup> calculated for C<sub>22</sub>H<sub>22</sub>N<sub>2</sub>O<sub>4</sub>ClBrNa 515.0349 found 515.0346.

**HPLC** analysis of the product: Daicel CHIRALPAK AD-H column; 5% <sup>i</sup>PrOH in hexanes; 1.0 mL/min; λ = 254 nm; retention times: 6.6 min (minor), 8.8 min (major).

**Methyl (*R*)-3-(((*tert*-butoxycarbonyl)amino)(4-fluorophenyl)methyl)-7-chloroindolizine-2-carboxylate 3p**

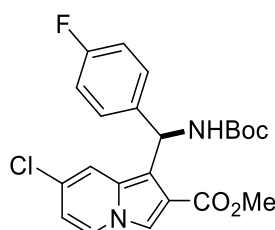

The two regioisomers **3p** and **4p** were prepared according to the **General Procedure A** (reaction time = 24 h). Purification by Flash chromatography (85:15 hexane/dichloromethane to 70:30 hexane/dichloromethane + 0.25% Et<sub>3</sub>N).

Colorless oil, 138 mg, 70% yield, 92% e.e..

**<sup>1</sup>H NMR** (500 MHz, CDCl<sub>3</sub>) δ 7.76 (s, 1H), 7.73 (d, *J* = 7.4 Hz, 1H), 7.58 (s, 1H), 7.15 (dd, *J* = 8.4, 5.3 Hz, 2H), 7.00 – 6.86 (m, 3H), 6.52 (dd, *J* = 7.4, 2.1 Hz, 1H), 6.40 (d, *J* = 9.8 Hz, 1H), 3.76 (s, 3H), 1.46 (s, 9H).

**<sup>13</sup>C NMR** (126 MHz, CDCl<sub>3</sub>) δ 165.5, 161.8, 156.0, 138.4, 130.9, 127.8(2C), 126.0, 125.4, 118.3, 117.5, 116.8, 115.0(2C), 114.71, 114.69, 79.6, 51.9, 48.4, 28.6(3C).

**$^{19}\text{F}$  NMR** (470 MHz,  $\text{CDCl}_3$ )  $\delta$  -121.62.

**HRMS**  $[\text{M}+\text{Na}]^+$  calculated for  $\text{C}_{22}\text{H}_{22}\text{N}_2\text{O}_4\text{FCINa}$  455.1150 found 455.1154.

$[\alpha]^{25}_{\text{D}} = 43.8$  ( $c = 0.21$ ,  $\text{CH}_2\text{Cl}_2$ ).

**HPLC** analysis of the product: Daicel CHIRALPAK IC column; 5% *i*PrOH in hexanes; 1.0 mL/min;  $\lambda = 254$  nm; retention times: 11.1 min (major), 23.3 min (minor).

**Methyl (*R*)-3-(((*tert*-butoxycarbonyl)amino)(4-fluorophenyl)methyl)-7-chloroindolizine-2-carboxylate 4p**

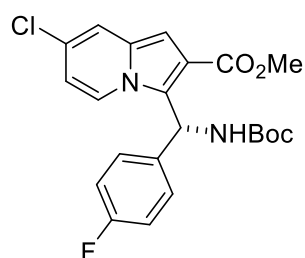

Colorless oil, 55 mg, 28% yield, 68% e.e..

**$^1\text{H}$  NMR** (500 MHz,  $\text{CDCl}_3$ )  $\delta$  7.98 (d,  $J = 7.7$  Hz, 1H), 7.39 (s, 1H), 7.16 (bs, 1H), 7.09 (dd,  $J = 8.4$ , 5.3 Hz, 2H), 6.97 – 6.90 (m, 2H), 6.86 (s, 1H), 6.65 (d,  $J = 9.6$  Hz, 1H), 6.57 (dd,  $J = 7.7$ , 2.2 Hz, 1H), 3.80 (s, 3H), 1.45 (s, 9H).

**$^{13}\text{C}$  NMR** (126 MHz,  $\text{CDCl}_3$ )  $\delta$  165.9, 162.0, 155.9, 135.7, 131.2, 128.4, 127.6(2C), 124.5, 123.0, 118.8, 117.6, 115.3(2C), 114.7, 102.0, 80.0, 51.9, 48.1, 28.4(3C).

**$^{19}\text{F}$  NMR** (470 MHz,  $\text{CDCl}_3$ )  $\delta$  -115.43.

**HRMS**  $[\text{M}+\text{Na}]^+$  calculated for  $\text{C}_{22}\text{H}_{22}\text{N}_2\text{O}_4\text{FCINa}$  455.1150 found 455.1155.

**HPLC** analysis of the product: Daicel CHIRALPAK IC column; 2.5% *i*PrOH in hexanes; 1.0 mL/min;  $\lambda = 254$  nm; retention times: 6.7 min (major), 8.5 min (minor).

**Methyl (*R*)-1-(((*tert*-butoxycarbonyl)amino)(4-chlorophenyl)methyl)-7-chloroindolizine-2-carboxylate 3q**

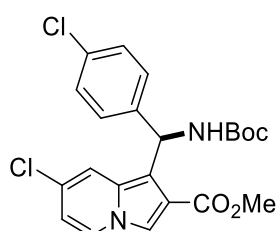

The two regioisomers **3q** and **4q** were prepared according to the **General Procedure A** (reaction time = 24 h). Purification by Flash chromatography (85:15 hexane/dichloromethane to 70:30 hexane/dichloromethane + 0.25% Et<sub>3</sub>N).

Colorless oil, 148 mg, 72% yield, 94% e.e..

**<sup>1</sup>H NMR** (500 MHz, CDCl<sub>3</sub>) δ 7.76 (s, 1H), 7.74 (d, *J* = 7.4 Hz, 1H), 7.59 (s, 1H), 7.19 (d, *J* = 8.3 Hz, 2H), 7.12 (d, *J* = 8.3 Hz, 2H), 6.93 (d, *J* = 9.8 Hz, 1H), 6.53 (dd, *J* = 7.4, 2.1 Hz, 1H), 6.39 (d, *J* = 9.8 Hz, 1H), 3.76 (s, 3H), 1.46 (s, 9H).

**<sup>13</sup>C NMR** (126 MHz, CDCl<sub>3</sub>) δ 165.5, 156.0, 141.3, 132.5, 131.0, 128.3(2C), 127.6(2C), 126.1, 125.5, 118.3, 117.5, 116.8, 114.7, 114.4, 79.6, 51.9, 48.4, 28.6(3C).

**HRMS** [M+Na]<sup>+</sup> calculated for C<sub>22</sub>H<sub>22</sub>N<sub>2</sub>O<sub>4</sub>Cl<sub>2</sub>Na 471.0854 found 455.1156.

[α]<sub>D</sub><sup>25</sup> = 97.2 (*c* = 0.25, CH<sub>2</sub>Cl<sub>2</sub>).

**HPLC** analysis of the product: Daicel CHIRALPAK IC column; 5% *i*PrOH in hexanes; 1.0 mL/min; λ = 254 nm; retention times: 10.9 min (major), 19.6 min (minor).

**Methyl (*R*)-3-(((*tert*-butoxycarbonyl)amino)(4-chlorophenyl)methyl)-7-chloroindolizine-2-carboxylate **4q****

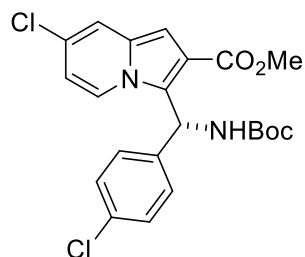

Colorless oil, 54 mg, 26% yield, 70% e.e..

**<sup>1</sup>H NMR** (500 MHz, CDCl<sub>3</sub>) δ 7.99 (d, *J* = 7.7 Hz, 1H), 7.39 (d, *J* = 1.8 Hz, 1H), 7.22 (d, *J* = 8.5 Hz, 2H), 7.13 (bs, 1H), 7.05 (d, *J* = 8.5 Hz, 2H), 6.85 (s, 1H), 6.65 (d, *J* = 9.7 Hz, 1H), 6.58 (dd, *J* = 7.7, 1.8 Hz, 1H), 3.80 (s, 3H), 1.45 (s, 9H).

**<sup>13</sup>C NMR** (126 MHz, CDCl<sub>3</sub>) δ 166.0, 156.1, 138.7, 133.3, 131.4, 128.8(2C), 128.3, 127.5(2C), 124.7, 123.1, 119.0, 117.8, 114.9, 102.2, 80.2, 52.1, 48.2, 28.5(3C).

**HRMS** [M+Na]<sup>+</sup> calculated for C<sub>22</sub>H<sub>22</sub>N<sub>2</sub>O<sub>4</sub>Cl<sub>2</sub>Na 471.0854 found 471.0858.

**HPLC** analysis of the product: Daicel CHIRALPAK IC column; 2.5% *i*PrOH in hexanes; 1.0 mL/min; λ = 254 nm; retention times: 6.8 min (major), 8.3 min (minor).

**Methyl (*R*)-1-((4-bromophenyl)((tert-butoxycarbonyl)amino)methyl)-7-chloroindolizine-2-carboxylate **3r****

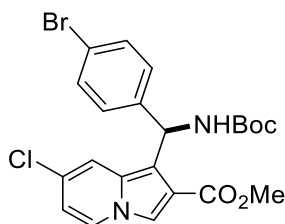

The two regioisomers **3r** and **4r** were prepared according to the **General Procedure A** (reaction time = 24 h). Purification by Flash chromatography (85:15 hexane/dichloromethane to 70:30 hexane/dichloromethane + 0.25% Et<sub>3</sub>N).

Colorless oil, 155 mg, 69% yield, 97% e.e..

**<sup>1</sup>H NMR** (600 MHz, CDCl<sub>3</sub>) δ 7.76 (s, 1H), 7.73 (d, *J* = 7.4 Hz, 1H), 7.58 (s, 1H), 7.34 (d, *J* = 8.2 Hz, 2H), 7.06 (d, *J* = 8.2 Hz, 2H), 6.94 (d, *J* = 9.8 Hz, 1H), 6.52 (dd, *J* = 7.4, 2.1 Hz, 1H), 6.37 (d, *J* = 9.8 Hz, 1H), 3.76 (s, 3H), 1.46 (s, 9H).

**<sup>13</sup>C NMR** (151 MHz, CDCl<sub>3</sub>) δ 165.5, 155.9, 141.8, 131.2(2C), 131.0, 128.0(2C), 126.1, 125.6, 120.6, 118.3, 117.4, 116.8, 114.7, 114.3, 79.6, 51.9, 48.4, 28.6(3C).

**HRMS** [M+K]<sup>+</sup> calculated for C<sub>22</sub>H<sub>22</sub>N<sub>2</sub>O<sub>4</sub>ClBrK 531.0089 found 531.0095.

[α]<sub>D</sub><sup>25</sup> = 94.1 (*c* = 0.26, CH<sub>2</sub>Cl<sub>2</sub>).

**HPLC** analysis of the product: Daicel CHIRALPAK IC column; 5% <sup>i</sup>PrOH in hexanes; 1.0 mL/min; λ = 254 nm; retention times: 10.5 min (major), 19.0 min (minor).

**Methyl (*R*)-3-((4-bromophenyl)((tert-butoxycarbonyl)amino)methyl)-7-chloroindolizine-2-carboxylate **4r****

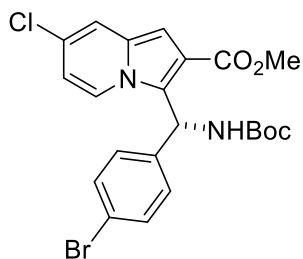

Colorless oil, 53 mg, 23% yield, 73% e.e..

**<sup>1</sup>H NMR** (500 MHz, CDCl<sub>3</sub>) δ 7.99 (d, *J* = 6.8 Hz, 1H), 7.44 – 7.34 (m, 3H), 7.12 (bs, 1H), 6.99 (d, *J* = 8.2 Hz, 2H), 6.85 (s, 1H), 6.63 (d, *J* = 9.4 Hz, 1H), 6.58 (d, *J* = 6.8 Hz, 1H), 3.80 (s, 3H), 1.45 (s, 9H).

**$^{13}\text{C}$  NMR** (126 MHz,  $\text{CDCl}_3$ )  $\delta$  166.0, 156.1, 139.3, 131.7(2C), 131.4, 128.3, 127.8(2C), 124.7, 123.1, 121.5, 119.0, 117.8, 114.9, 102.2, 80.2, 52.1, 48.3, 28.5(3C).

**HRMS**  $[\text{M}+\text{K}]^+$  calculated for  $\text{C}_{22}\text{H}_{22}\text{N}_2\text{O}_4\text{ClBrK}$  531.0089 found 531.0087.

**HPLC** analysis of the product: Daicel CHIRALPAK AD-H column; 5%  $i$ PrOH in hexanes; 1.0 mL/min;  $\lambda$  = 254 nm; retention times: 19.9 min (minor), 25.4 min (major).

**Methyl (*R*)-1-(((*tert*-butoxycarbonyl)amino)(4-iodophenyl)methyl)-7-chloroindolizine-2-carboxylate **3s****

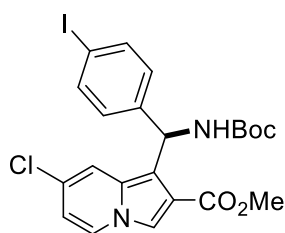

The two regioisomers **3s** and **4s** were prepared according to the **General Procedure A** (reaction time = 48 h). Purification by Flash chromatography (90:10 hexane/dichloromethane to 70:30 hexane/dichloromethane + 0.25%  $\text{Et}_3\text{N}$ ).

Colorless oil, 173 mg, 70% yield, 90% e.e..

**$^1\text{H}$  NMR** (500 MHz,  $\text{CDCl}_3$ )  $\delta$  7.77 (s, 1H), 7.74 (d,  $J$  = 7.4 Hz, 1H), 7.59 (s, 1H), 7.54 (d,  $J$  = 8.4 Hz, 2H), 6.94 (d,  $J$  = 8.4 Hz, 2H), 6.91 (s, 1H), 6.54 (dd,  $J$  = 7.4, 2.0 Hz, 1H), 6.36 (d,  $J$  = 9.8 Hz, 1H), 3.76 (s, 3H), 1.46 (s, 9H).

**$^{13}\text{C}$  NMR** (126 MHz,  $\text{CDCl}_3$ )  $\delta$  165.5, 156.0, 142.6, 137.2(2C), 131.0, 128.3(2C), 126.1, 125.6, 118.3, 117.5, 116.8, 114.8, 114.3, 92.2, 79.6, 51.9, 48.5, 28.6(3C).

**HRMS**  $[\text{M}+\text{Na}]^+$  calculated for  $\text{C}_{22}\text{H}_{22}\text{N}_2\text{O}_4\text{ClINa}$  563.0210 found 563.0215.

$[\alpha]_D^{25}$  = 78.3 ( $c$  = 0.25,  $\text{CH}_2\text{Cl}_2$ ).

**HPLC** analysis of the product: Daicel CHIRALPAK IC column; 5%  $i$ PrOH in hexanes; 1.0 mL/min;  $\lambda$  = 254 nm; retention times: 11.8 min (major), 19.9 min (minor).

**Methyl (*R*)-3-(((*tert*-butoxycarbonyl)amino)(4-iodophenyl)methyl)-7-chloroindolizine-2-carboxylate **4s****

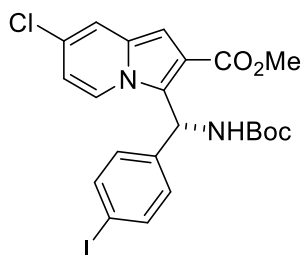

Colorless oil, 70 mg, 28% yield, 67% e.e..

**<sup>1</sup>H NMR** (400 MHz, CDCl<sub>3</sub>) δ 7.98 (d, *J* = 7.7 Hz, 1H), 7.57 (d, *J* = 8.4 Hz, 2H), 7.39 (d, *J* = 2.2 Hz, 1H), 7.09 (s, 1H), 6.92 – 6.83 (m, 3H), 6.63 (d, *J* = 9.6 Hz, 1H), 6.58 (dd, *J* = 7.7, 2.2 Hz, 1H), 3.80 (s, 3H), 1.44 (s, 9H).

**<sup>13</sup>C NMR** (101 MHz, CDCl<sub>3</sub>) δ 166.0, 156.1, 140.0, 137.7(2C), 131.4, 128.2, 128.1(2C), 124.8, 123.1, 119.0, 117.9, 114.9, 102.2, 93.0, 80.2, 52.1, 48.4, 28.6(3C).

**HRMS** [M+Na]<sup>+</sup> calculated for C<sub>22</sub>H<sub>22</sub>N<sub>2</sub>O<sub>4</sub>ClINa 563.0210 found 563.0209.

**HPLC** analysis of the product: Daicel CHIRALPAK IC column; 2.5% *i*PrOH in hexanes; 1.0 mL/min; λ = 254 nm; retention times: 7.4 min (major), 9.0 min (minor).

**Methyl (*R*)-1-((4-bromophenyl)((*tert*-butoxycarbonyl)amino)methyl)-3-(2,2,2-trifluoroacetyl)indolizine-2-carboxylate **10****

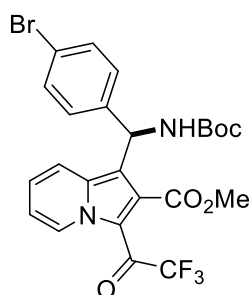

Under argon atmosphere and room temperature, **3f** (45.9 mg, 0.10 mmol) was dissolved in dichloromethane (2.0 mL), which was added *i*Pr<sub>2</sub>NEt (27.8 μL, 0.16 mmol). Then, TFAA (20.9 μL, 0.15 mmol) was added dropwise to the reaction mixture, which was further stirred at room temperature for 24 h. After the completion of the reaction indicated by TLC, the solvent was removed under reduced pressure, and the residue was purified by flash chromatography (90:10 hexane/dichloromethane to 80:20 hexane/dichloromethane + 0.25% Et<sub>3</sub>N) to give the product **10**.

Yellowish oil, 50 mg, 90% yield, 91% e.e..

**<sup>1</sup>H NMR** (400 MHz, CDCl<sub>3</sub>) δ 9.79 (d, *J* = 7.2 Hz, 1H), 7.92 (d, *J* = 9.0 Hz, 1H), 7.48 – 7.42 (m, 1H), 7.40 (d, *J* = 8.2 Hz, 2H), 7.21 – 7.13 (m, 1H), 7.10 (d, *J* = 8.2 Hz, 2H), 6.48 (d, *J* = 9.6 Hz, 1H), 6.11 (d, *J* = 9.6 Hz, 1H), 3.58 (s, 3H), 1.45 (s, 9H).

**<sup>13</sup>C NMR** (101 MHz, CDCl<sub>3</sub>) δ 170.5, 165.7, 155.6, 139.3, 138.0, 131.5(2C), 128.9, 128.3(2C), 128.0, 127.7, 121.3, 120.2, 118.0, 117.7, 116.7, 115.8, 80.3, 52.7, 48.4, 28.5(3C).

**<sup>19</sup>F NMR** (376 MHz, CDCl<sub>3</sub>) δ -71.90.

**HRMS** [M+Na]<sup>+</sup> calculated for C<sub>24</sub>H<sub>22</sub>F<sub>3</sub>BrN<sub>2</sub>O<sub>5</sub>Na 577.0562 found 577.0561.

[α]<sub>D</sub><sup>25</sup> = -27.5 (*c* = 0.25, CH<sub>2</sub>Cl<sub>2</sub>).

**HPLC** analysis of the product: Daicel CHIRALPAK IC column; 5.0% *i*PrOH in hexanes; 1.0 mL/min; λ = 254 nm; retention times: 10.7 min (major), 23.1 min (minor).

### 3.8. Products with Cbz-protecting group 6a-m, 7a-m, 8 and 9

#### Methyl (*R*)-1-(((benzyloxy)carbonyl)amino)(phenyl)methylindolizine-2-carboxylate 6a

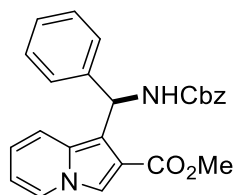

The product was prepared according to the **General Procedure D** (reaction time = 48 h). Purification by Flash chromatography (80:20 hexane/dichloromethane to 70:30 hexane/dichloromethane + 0.25% Et<sub>3</sub>N).

Colorless oil, 153 mg, 31% yield, 93% e.e..

**<sup>1</sup>H NMR** (400 MHz, CDCl<sub>3</sub>) δ 7.81 (s, 1H), 7.79 (d, *J* = 6.2 Hz, 1H), 7.64 (d, *J* = 9.3 Hz, 1H), 7.48 – 7.16 (m, 11H), 6.75 (dd, *J* = 9.3, 6.5 Hz, 1H), 6.64 (d, *J* = 9.9 Hz, 1H), 6.58 – 6.52 (td, *J* = 6.8, 1.2 Hz, 1H), 5.26 – 5.09 (m, 2H), 3.74 (s, 3H).

**<sup>13</sup>C NMR** (101 MHz, CDCl<sub>3</sub>) δ 166.0, 156.7, 142.6, 136.9, 131.4, 128.5(2C), 128.19(2C), 128.17(2C), 128.0, 126.7, 126.2(2C), 125.3, 118.9, 118.3, 117.8, 116.4, 114.4, 112.9, 66.8, 51.7, 49.6.

**HRMS** [M+Na]<sup>+</sup> calculated for C<sub>25</sub>H<sub>22</sub>N<sub>2</sub>O<sub>4</sub>Na 437.1477 found 437.14779.

[α]<sub>D</sub><sup>25</sup> = 21.1 (*c* = 0.28, CH<sub>2</sub>Cl<sub>2</sub>).

**HPLC** analysis of the product: Daicel CHIRALPAK IC column; 20.0% *i*PrOH in hexanes; 1.0 mL/min;  $\lambda$  = 254 nm; retention times: 15.3 min (major), 25.9 min (minor).

**Methyl (*R*)-1-(((benzyloxy)carbonyl)amino)(4-bromophenyl)methyl)-7-chloroindolizine-2-carboxylate 6m**

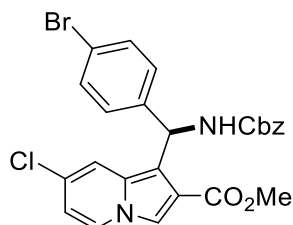

The product was prepared according to the **Procedure E** (reaction time = 72 h). Purification by Flash chromatography (90:10 hexane/ethyl acetate to 80:20 hexane/ethyl acetate + 0.25% Et<sub>3</sub>N).

Colorless oil, 129 mg, 61% yield, 88% e.e..

**<sup>1</sup>H NMR** (400 MHz, CDCl<sub>3</sub>)  $\delta$  7.77 (s, 1H), 7.74 (d, *J* = 7.4 Hz, 1H), 7.60 (s, 1H), 7.44 – 7.21 (m, 8H), 7.08 (d, *J* = 8.4 Hz, 2H), 6.54 (dd, *J* = 7.4, 2.1 Hz, 1H), 6.43 (d, *J* = 9.8 Hz, 1H), 5.24 – 5.04 (m, 2H), 3.74 (s, 3H).

**<sup>13</sup>C NMR** (101 MHz, CDCl<sub>3</sub>)  $\delta$  165.5, 156.6, 141.2, 136.7, 131.3(2C), 131.1, 128.6(2C), 128.3, 128.2(2C), 128.0(2C), 126.1, 125.8, 120.8, 118.4, 117.4, 116.6, 114.8, 113.9, 67.0, 51.9, 49.1.

**HRMS** [M+Na]<sup>+</sup> calculated for C<sub>25</sub>H<sub>20</sub>N<sub>2</sub>O<sub>4</sub>ClBrNa 549.0193 found 549.0190.

$[\alpha]_D^{25}$  = 54.3 (*c* = 0.25, CH<sub>2</sub>Cl<sub>2</sub>).

**HPLC** analysis of the product: Daicel CHIRALPAK IC column; 20.0% *i*PrOH in hexanes; 1.0 mL/min;  $\lambda$  = 254 nm; retention times: 9.2 min (major), 12.9 min (minor).

**Methyl (*R*)-3-(((benzyloxy)carbonyl)amino)(phenyl)methyl)indolizine-2-carboxylate 7a**

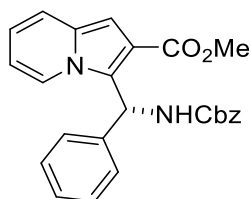

The product was prepared according to the **General Procedure C** (reaction time = 72 h). Purification by Flash chromatography (80:20 hexane/dichloromethane to 70:30 hexane/dichloromethane + 0.25% Et<sub>3</sub>N).



The product was prepared according to the **Procedure D** (reaction time = 48 h). Purification by Flash chromatography (80:20 hexane/dichloromethane to 70:30 hexane/dichloromethane + 0.25% Et<sub>3</sub>N).

Colorless oil, 124 mg, 88% yield, 92% e.e. (**General Procedure C**).

Colorless oil, 335 mg, 67% yield, 84% e.e. (**Procedure D**).

**<sup>1</sup>H NMR** (400 MHz, CD<sub>2</sub>Cl<sub>2</sub>) δ 8.04 (d, *J* = 7.2 Hz, 1H), 7.61 (d, *J* = 9.1 Hz, 1H), 7.47 – 7.15 (m, 11H), 6.95 (s, 1H), 6.81 (d, *J* = 9.5 Hz, 1H), 6.75 (dd, *J* = 9.1, 6.4 Hz, 1H), 6.68 – 6.58 (m, 1H), 5.12 (q, *J* = 12.3 Hz, 2H), 3.80 (s, 3H).

**<sup>13</sup>C NMR** (101 MHz, CD<sub>2</sub>Cl<sub>2</sub>) δ 166.6, 156.6, 140.1, 136.9, 131.8, 128.6(2C), 128.5(2C), 128.1, 128.0(2C), 127.7, 127.5, 126.2(2C), 122.3, 120.6, 118.25, 116.9, 113.2, 102.3, 66.9, 51.8, 49.5.

**HRMS** [M+H]<sup>+</sup> calculated for C<sub>25</sub>H<sub>23</sub>N<sub>2</sub>O<sub>4</sub> 415.1658 found 415.1656

[α]<sub>D</sub><sup>25</sup> = -13.3 (*c* = 0.25, CH<sub>2</sub>Cl<sub>2</sub>) (**General Procedure C**).

**HPLC** analysis of the product: Daicel CHIRALPAK IC column; 6.0% iPrOH in hexanes; 1.0 mL/min; λ = 254 nm; retention times: 16.3 min (major), 24.4 min (minor) (**General Procedure C**).

#### Methyl (*R*)-3-(((benzyloxy)carbonyl)amino)(4-fluorophenyl)methyl)indolizine-2-carboxylate **7b**

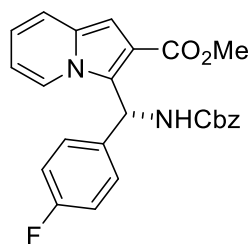

The product was prepared according to the **General Procedure C** (reaction time = 48 h). Purification by Flash chromatography (85:15 hexane/dichloromethane to 75:25 hexane/dichloromethane + 0.25% Et<sub>3</sub>N).

Colorless oil, 132 mg, 90% yield, 90% e.e..

**<sup>1</sup>H NMR** (400 MHz, CDCl<sub>3</sub>) δ 8.04 (d, *J* = 7.3 Hz, 1H), 7.69 (d, *J* = 9.7 Hz, 1H), 7.45 – 7.27 (m, 6H), 7.14 (dd, *J* = 8.4, 5.3 Hz, 2H), 6.99 – 6.90 (m, 3H), 6.80 – 6.70 (m, 2H), 6.67 – 6.58 (m, 1H), 5.22 – 5.07 (m, 2H), 3.81 (s, 3H).

**<sup>13</sup>C NMR** (101 MHz, CDCl<sub>3</sub>) δ 166.6, 162.2, 156.8, 136.6, 135.8, 131.8, 128.6(2C), 128.23(2C), 128.22, 128.0(2C), 127.4, 122.1, 120.8, 118.4, 116.9, 115.5(2C), 113.4, 102.5, 67.2, 52.0, 49.0.

**<sup>19</sup>F NMR** (376 MHz, CDCl<sub>3</sub>) δ -115.34.

**HRMS** [M+ Na]<sup>+</sup> calculated for C<sub>25</sub>H<sub>21</sub>FN<sub>2</sub>O<sub>4</sub>Na 455.1383 found 455.1380.

$[\alpha]_D^{25} = -22.2$  ( $c = 0.25$ ,  $\text{CH}_2\text{Cl}_2$ ).

**HPLC** analysis of the product: Daicel CHIRALPAK IC column; 2.5%  $i$ PrOH in hexanes; 1.0 mL/min;  $\lambda = 254$  nm; retention times: 17.4 min (major), 20.4 min (minor).

**Methyl (*R*)-3-(((benzyloxy)carbonyl)amino)(4-chlorophenyl)methyl)indolizine-2-carboxylate 7c**

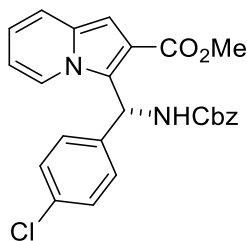

The product was prepared according to the **General Procedure C** (reaction time = 72 h). Purification by Flash chromatography (90:10 hexane/dichloromethane to 80:20 hexane/dichloromethane + 0.25%  $\text{Et}_3\text{N}$ ).

Colorless oil, 130 mg, 85% yield, 88% e.e..

**$^1\text{H}$  NMR** (400 MHz,  $\text{CDCl}_3$ )  $\delta$  8.04 (d,  $J = 7.3$  Hz, 1H), 7.63 (d,  $J = 9.7$  Hz, 1H), 7.45 – 7.28 (m, 6H), 7.22 (d,  $J = 8.6$  Hz, 2H), 7.09 (d,  $J = 8.6$  Hz, 2H), 6.93 (s, 1H), 6.80 – 6.70 (m, 2H), 6.67 – 6.59 (m, 1H), 5.23 – 5.05 (m, 2H), 3.80 (s, 3H).

**$^{13}\text{C}$  NMR** (101 MHz,  $\text{CDCl}_3$ )  $\delta$  166.5, 156.8, 138.6, 136.5, 133.4, 131.9, 128.7(2C), 128.6(2C), 128.24, 128.22(2C), 127.6(2C), 127.2, 122.1, 120.8, 118.4, 116.9, 113.4, 102.5, 67.2, 52.0, 48.9.

**HRMS**  $[\text{M} + \text{Na}]^+$  calculated for  $\text{C}_{25}\text{H}_{21}\text{ClN}_2\text{O}_4\text{Na}$  471.1088 found 471.1084.

$[\alpha]_D^{25} = 5.1$  ( $c = 0.25$ ,  $\text{CH}_2\text{Cl}_2$ ).

**HPLC** analysis of the product: Daicel CHIRALPAK IC column; 2.5%  $i$ PrOH in hexanes; 1.0 mL/min;  $\lambda = 254$  nm; retention times: 17.4 min (major), 19.9 min (minor).

**Methyl (*R*)-3-(((benzyloxy)carbonyl)amino)(4-bromophenyl)methyl)indolizine-2-carboxylate 7d**

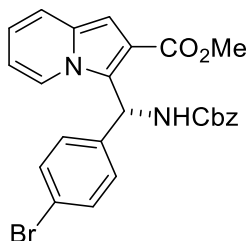

The product was prepared according to the **General Procedure C** (reaction time = 72 h). Purification by Flash chromatography (85:15 hexane/dichloromethane to 75:25 hexane/dichloromethane + 0.25%  $\text{Et}_3\text{N}$ ).

Colorless oil, 153 mg, 91% yield, 88% e.e..

**<sup>1</sup>H NMR** (400 MHz, CDCl<sub>3</sub>) δ 8.05 (d, *J* = 7.3 Hz, 1H), 7.64 (d, *J* = 9.6 Hz, 1H), 7.46 – 7.27 (m, 8H), 7.04 (d, *J* = 8.4 Hz, 2H), 6.93 (s, 1H), 6.79 – 6.70 (m, 2H), 6.68 – 6.58 (m, 1H), 5.22 – 5.06 (m, 2H), 3.80 (s, 3H).

**<sup>13</sup>C NMR** (101 MHz, CDCl<sub>3</sub>) δ 166.5, 156.8, 139.2, 136.5, 131.9, 131.7(2C), 128.6(2C), 128.3, 128.2(2C), 128.0(2C), 127.1, 122.1, 121.5, 120.8, 118.4, 116.9, 113.5, 102.5, 67.2, 52.0, 49.0.

**HRMS** [M+Na]<sup>+</sup> calculated for C<sub>25</sub>H<sub>21</sub>N<sub>2</sub>O<sub>4</sub>BrNa 515.0582 found 515.0576.

[α]<sub>D</sub><sup>25</sup> = 13.7 (*c* = 0.26, CH<sub>2</sub>Cl<sub>2</sub>).

**HPLC** analysis of the product: Daicel CHIRALPAK IC column; 2.5% *i*PrOH in hexanes; 1.0 mL/min; λ = 254 nm; retention times: 21.5 min (major), 25.2 min (minor).

**Methyl (*R*)-3-(((benzyloxy)carbonyl)amino)(4-(trifluoromethyl)phenyl)methyl)indolizine-2-carboxylate 7e**

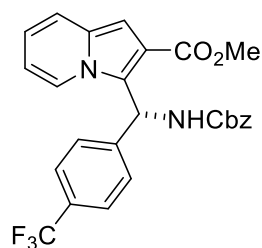

The product was prepared according to the **General Procedure C** (reaction time = 216 h). Additional 5% of catalyst were added over 8 days. Purification by Flash chromatography (90:10 hexane/dichloromethane to 80:20 hexane/dichloromethane + 0.25% Et<sub>3</sub>N). (13 mg, 22% of indolizine **1a** recovered).

Colorless oil, 100 mg, 61% yield, 93% e.e..

**<sup>1</sup>H NMR** (400 MHz, CDCl<sub>3</sub>) δ 8.09 (d, *J* = 7.2 Hz, 1H), 7.64 (d, *J* = 9.1 Hz, 1H), 7.51 (d, *J* = 8.2 Hz, 2H), 7.45 – 7.27 (m, 8H), 6.94 (s, 1H), 6.84 (d, *J* = 9.6 Hz, 1H), 6.76 (dd, *J* = 9.1, 6.4 Hz, 1H), 6.70 – 6.61 (m, 1H), 5.24 – 5.07 (m, 2H), 3.79 (s, 3H).

**<sup>13</sup>C NMR** (101 MHz, CDCl<sub>3</sub>) δ 166.5, 156.9, 144.2, 136.5, 132.0, 129.8, 128.7(2C), 128.32, 128.28(2C), 126.9, 126.5(2C), 125.6(2C), 124.2, 122.0, 120.9, 118.5, 117.0, 113.6, 102.6, 67.3, 52.0, 49.1.

**<sup>19</sup>F NMR** (376 MHz, CDCl<sub>3</sub>) δ -62.54.

**HRMS** [M+Na]<sup>+</sup> calculated for C<sub>26</sub>H<sub>21</sub>N<sub>2</sub>O<sub>4</sub>F<sub>3</sub>Na 505.1351 found 505.1355.

$[\alpha]^{25}_{\text{D}} = 11.5$  ( $c = 0.25$ ,  $\text{CH}_2\text{Cl}_2$ ).

**HPLC** analysis of the product: Daicel CHIRALCEL OD-H column; 5.0%  $i$ PrOH in hexanes; 1.0 mL/min;  $\lambda = 254$  nm; retention times: 17.9 min (minor), 20.2 min (major).

**Methyl (*R*)-3-(((benzyloxy)carbonyl)amino)(4-cyanophenyl)methylindolizine-2-carboxylate **7f****

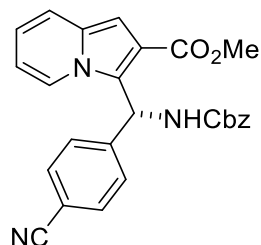

The product was prepared according to the **General Procedure C** (reaction time = 144 h). Purification by Flash chromatography (85:15 hexane/dichloromethane to 70:30 hexane/dichloromethane + 0.25%  $\text{Et}_3\text{N}$ ). (29 mg, 48% of indolizine **1a** recovered).

Colorless oil, 63 mg, 42% yield, 92% e.e..

**$^1\text{H}$  NMR** (400 MHz,  $\text{CDCl}_3$ )  $\delta$  8.10 (d,  $J = 7.3$  Hz, 1H), 7.60 – 7.49 (m, 3H), 7.43 (d,  $J = 9.1$  Hz, 1H), 7.39 – 7.30 (m, 5H), 7.26 (d,  $J = 8.2$  Hz, 2H), 6.93 (s, 1H), 6.83 (d,  $J = 9.6$  Hz, 1H), 6.77 (dd,  $J = 9.1$ , 6.5 Hz, 1H), 6.72 – 6.62 (m, 1H), 5.23 – 5.06 (m, 2H), 3.77 (s, 3H).

**$^{13}\text{C}$  NMR** (101 MHz,  $\text{CDCl}_3$ )  $\delta$  166.4, 156.9, 145.6, 136.3, 132.4(2C), 132.1, 128.7(2C), 128.4, 128.3(2C), 126.9(2C), 126.5, 121.9, 120.9, 118.8, 118.7, 117.0, 113.7, 111.4, 102.6, 67.4, 52.0, 49.0.

**HRMS**  $[\text{M}+\text{H}]^+$  calculated for  $\text{C}_{26}\text{H}_{22}\text{N}_3\text{O}_4$  440.1610 found 440.1613.

$[\alpha]^{25}_{\text{D}} = 36.1$  ( $c = 0.29$ ,  $\text{CH}_2\text{Cl}_2$ ).

**HPLC** analysis of the product: Daicel CHIRALPAK AD-H column; 30%  $i$ PrOH in hexanes; 1.0 mL/min;  $\lambda = 254$  nm; retention times: 29.7 min (minor), 34.7 min (major).

**Methyl (*R*)-3-(((benzyloxy)carbonyl)amino)(4-nitrophenyl)methylindolizine-2-carboxylate **7g****

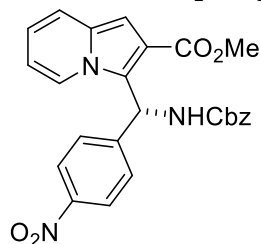

The product was prepared according to the **General Procedure C** (reaction time = 192 h (96 h at r.t. and 96 h at 40 °C)). Additional 5% of catalyst were added over 8 days. Purification by Flash chromatography (90:10 hexane/dichloromethane to 80:20 hexane/dichloromethane + 0.25% Et<sub>3</sub>N). (10 mg, 17% of indolizine **1a** recovered).

Colorless oil, 100 mg, 64% yield, 92% e.e..

**<sup>1</sup>H NMR** (400 MHz, CDCl<sub>3</sub>) δ 8.18 – 8.05 (m, 3H), 7.57 (d, *J* = 9.6 Hz, 1H), 7.44 (d, *J* = 9.1 Hz, 1H), 7.41 – 7.27 (m, 7H), 6.94 (s, 1H), 6.87 (d, *J* = 9.6 Hz, 1H), 6.78 (dd, *J* = 9.1, 6.4 Hz, 1H), 6.73 – 6.63 (m, 1H), 5.26 – 5.06 (m, 2H), 3.78 (s, 3H).

**<sup>13</sup>C NMR** (101 MHz, CDCl<sub>3</sub>) δ 166.4, 156.9, 147.6, 147.3, 136.3, 132.1, 128.7(2C), 128.4, 128.3(2C), 127.0(2C), 126.5, 123.8(2C), 121.9, 120.9, 118.7, 117.0, 113.8, 102.6, 67.5, 52.0, 48.9.

**HRMS** [M+Na]<sup>+</sup> calculated for C<sub>25</sub>H<sub>21</sub>N<sub>3</sub>O<sub>6</sub>Na 482.1328 found 482.1333.

[α]<sub>D</sub><sup>25</sup> = 49.6 (*c* = 0.25, CH<sub>2</sub>Cl<sub>2</sub>).

**HPLC** analysis of the product: Daicel CHIRALCEL OD-H column; 20.0% *i*PrOH in hexanes; 1.0 mL/min; λ = 254 nm; retention times: 20.4 min (major), 25.4 min (minor).

#### Methyl (*R*)-3-(((benzyloxy)carbonyl)amino)(2-fluorophenyl)methylindolizine-2-carboxylate **7h**

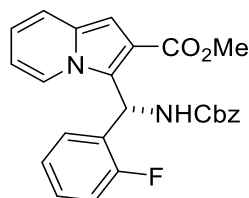

The product was prepared according to the **General Procedure C** (reaction time = 192 h). Purification by Flash chromatography (95:05 hexane/dichloromethane to 90:10 hexane/dichloromethane + 0.25% Et<sub>3</sub>N).

Colorless oil, 142 mg, 97% yield, 93% e.e..

**<sup>1</sup>H NMR** (400 MHz, CDCl<sub>3</sub>) δ 8.23 (d, *J* = 7.2 Hz, 1H), 7.90 (d, *J* = 9.0 Hz, 1H), 7.59 – 7.52 (m, 1H), 7.42 – 7.27 (m, 6H), 7.23 – 7.16 (m, 1H), 7.12 – 7.04 (m, 1H), 7.00 – 6.92 (m, 2H), 6.87 (s, 1H), 6.73 (dd, *J* = 9.0, 6.4 Hz, 1H), 6.69 – 6.62 (m, 1H), 5.19 – 5.07 (m, 2H), 3.84 (s, 3H).

**<sup>13</sup>C NMR** (101 MHz, CDCl<sub>3</sub>) δ 166.8, 160.5, 156.3, 136.6, 131.7, 129.2, 128.6(2C), 128.5, 128.22, 128.17(2C), 127.0, 126.8, 124.1, 122.8, 120.5, 118.3, 116.6, 115.4, 113.0, 102.4, 67.1, 52.0, 44.3.

**<sup>19</sup>F NMR** (376 MHz, CDCl<sub>3</sub>) δ -116.53.

**HRMS** [M+ Na]<sup>+</sup> calculated for C<sub>25</sub>H<sub>21</sub>FN<sub>2</sub>O<sub>4</sub>Na 455.1383 found 455.1378.

$[\alpha]^{25}_{\text{D}} = 36.4$  ( $c = 0.25$ ,  $\text{CH}_2\text{Cl}_2$ ).

**HPLC** analysis of the product: Daicel CHIRALPAK IC column; 5.0%  $i$ PrOH in hexanes; 1.0 mL/min;  $\lambda = 254$  nm; retention times: 17.6 min (major), 21.8 min (minor).

**Methyl (*R*)-3-(((benzyloxy)carbonyl)amino)(2-chlorophenyl)methyl)indolizine-2-carboxylate 7i**

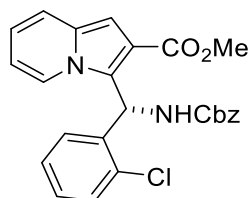

The product was prepared according to the **General Procedure C** (reaction time = 192 h). Purification by Flash chromatography (90:10 hexane/dichloromethane to 80:20 hexane/dichloromethane + 0.25%  $\text{Et}_3\text{N}$ ).

Semisolid, 137 mg, 90% yield, 95% e.e..

**$^1\text{H}$  NMR** (400 MHz,  $\text{CDCl}_3$ )  $\delta$  8.19 (d,  $J = 7.3$  Hz, 1H), 7.53 (dd,  $J = 9.0, 2.1$  Hz, 1H), 7.45 – 7.27 (m, 8H), 7.23 – 7.14 (m, 2H), 6.92 (d,  $J = 9.8$  Hz, 1H), 6.88 (s, 1H), 6.74 (dd,  $J = 9.0, 6.4$  Hz, 1H), 6.69 – 6.61 (m, 1H), 5.22 – 5.06 (m, 2H), 3.80 (s, 3H).

**$^{13}\text{C}$  NMR** (101 MHz,  $\text{CDCl}_3$ )  $\delta$  166.6, 156.2, 136.7, 136.6, 133.7, 131.7, 129.9, 129.3, 128.9, 128.6(2C), 128.13, 128.09(2C), 126.6, 126.4, 122.9, 120.5, 118.3, 117.3, 113.0, 102.3, 67.1, 51.9, 47.8.

**HRMS**  $[\text{M}+\text{Na}]^+$  calculated for  $\text{C}_{25}\text{H}_{21}\text{ClN}_2\text{O}_4\text{Na}$  471.1088 found 471.1093.

$[\alpha]^{25}_{\text{D}} = -17.1$  ( $c = 0.27$ ,  $\text{CH}_2\text{Cl}_2$ ).

**HPLC** analysis of the product: Daicel CHIRALPAK IC column; 5.0%  $i$ PrOH in hexanes; 1.0 mL/min;  $\lambda = 254$  nm; retention times: 17.9 min (major), 21.9 min (minor).

**Methyl (*R*)-3-(((benzyloxy)carbonyl)amino)(2-bromophenyl)methyl)indolizine-2-carboxylate 7j**

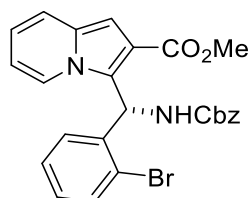

The product was prepared according to the **General Procedure C** (reaction time = 144 h). Purification by Flash chromatography (90:10 hexane/dichloromethane to 80:20 hexane/dichloromethane + 0.25%  $\text{Et}_3\text{N}$ ).

Semisolid, 156 mg, 93% yield, 94% e.e..

**<sup>1</sup>H NMR** (400 MHz, CDCl<sub>3</sub>) δ 8.14 (d, *J* = 7.2 Hz, 1H), 7.54 (dd, *J* = 9.0, 1.3 Hz, 1H), 7.49 (dd, *J* = 7.9, 1.7 Hz, 1H), 7.43 – 7.18 (m, 8H), 7.10 (ddd, *J* = 7.9, 7.6 Hz, 1.7 Hz, 1H), 6.89 (s, 1H), 6.85 (d, *J* = 9.8 Hz, 1H), 6.74 (dd, *J* = 9.0, 6.4 Hz, 1H), 6.69 – 6.61 (m, 1H), 5.23 – 5.06 (m, 2H), 3.80 (s, 3H).

**<sup>13</sup>C NMR** (101 MHz, CDCl<sub>3</sub>) δ 166.5, 156.1, 138.1, 136.6, 133.3, 131.7, 129.7, 129.2, 128.5(2C), 128.1, 128.0(2C), 127.2, 126.3, 123.9, 123.0, 120.5, 118.4, 117.4, 113.0, 102.3, 67.0, 51.9, 50.2.

**HRMS** [M+H]<sup>+</sup> calculated for C<sub>25</sub>H<sub>22</sub>N<sub>2</sub>O<sub>4</sub>Br 493.0763 found 493.0765.

[α]<sub>D</sub><sup>25</sup> = -60.2 (*c* = 0.25, CH<sub>2</sub>Cl<sub>2</sub>).

**HPLC** analysis of the product: Daicel CHIRALPAK IC column; 5.0% *i*PrOH in hexanes; 1.0 mL/min; λ = 254 nm; retention times: 21.2 min (major), 25.9 min (minor).

**Methyl (*R*)-3-(((benzyloxy)carbonyl)amino)(thiophen-2-yl)methyl)indolizine-2-carboxylate 7k**

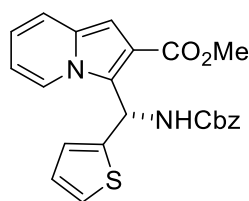

The product was prepared according to the **General Procedure C** (reaction time = 24 h). Purification by Flash chromatography (90:10 hexane/dichloromethane to 80:20 hexane/dichloromethane + 0.25% Et<sub>3</sub>N).

Colorless oil, 136 mg, 95% yield, 88% e.e..

**<sup>1</sup>H NMR** (400 MHz, CDCl<sub>3</sub>) δ 8.06 (d, *J* = 7.3 Hz, 1H), 7.91 (d, *J* = 9.6 Hz, 1H), 7.45 – 7.27 (m, 6H), 7.17 (d, *J* = 5.1 Hz, 1H), 7.00 (d, *J* = 9.5 Hz, 1H), 6.95 (s, 1H), 6.87 (dd, *J* = 5.1, 3.6 Hz, 1H), 6.78 – 6.68 (m, 2H), 6.66 – 6.56 (m, 1H), 5.25 – 5.08 (m, 2H), 3.85 (s, 3H).

**<sup>13</sup>C NMR** (101 MHz, CDCl<sub>3</sub>) δ 166.5, 156.4, 144.2, 136.5, 131.8, 128.5(2C), 128.1(3C), 126.9, 126.8, 125.0, 124.6, 122.3, 120.6, 118.4, 116.9, 113.3, 102.4, 67.1, 52.0, 46.4.

**HRMS** [M+Na]<sup>+</sup> calculated for C<sub>23</sub>H<sub>20</sub>N<sub>2</sub>O<sub>4</sub>SNa 443.1041 found 443.1040.

[α]<sub>D</sub><sup>25</sup> = -55.2 (*c* = 0.25, CH<sub>2</sub>Cl<sub>2</sub>).

**HPLC** analysis of the product: Daicel CHIRALPAK IC column; 10% *i*PrOH in hexanes; 1.0 mL/min; λ = 254 nm; retention times: 11.4 min (major), 18.7 min (minor).

**Methyl (*R*)-3-(((benzyloxy)carbonyl)amino)(phenyl)methyl)-8-fluorindolizine-2-carboxylate 7l**

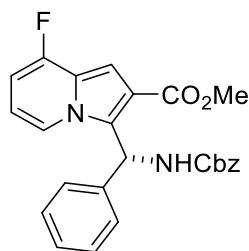

The product was prepared according to the **General Procedure C** (reaction time = 192 h (96 h at r.t. and 96 h at 40 °C)). Additional 5% of **B1** catalyst were added over 8 days. Purification by Flash chromatography (90:10 hexane/dichloromethane + 0.25% Et<sub>3</sub>N). (23 mg, 35% of indolizine **1d** recovered).

Colorless oil, 93 mg, 63% yield, 82% e.e..

**<sup>1</sup>H NMR** (400 MHz, CDCl<sub>3</sub>) δ 7.90 (d, *J* = 7.2 Hz, 1H), 7.65 (d, *J* = 9.6 Hz, 1H), 7.44 – 7.22 (m, 8H), 7.19 (d, *J* = 7.2 Hz, 2H), 7.13 (s, 1H), 6.83 (d, *J* = 9.6 Hz, 1H), 6.60 – 6.49 (m, 1H), 6.43 (dd, *J* = 10.2, 7.2 Hz, 1H), 5.26 – 5.08 (m, 2H), 3.81 (s, 3H).

**<sup>13</sup>C NMR** (101 MHz, CDCl<sub>3</sub>) δ 166.0, 156.8, 155.1, 139.5, 136.6, 129.7, 128.7(2C), 128.6(2C), 128.19, 128.18(2C), 127.7, 126.1(2C), 124.4, 118.7, 117.2, 112.3, 100.3, 100.2, 67.2, 52.0, 49.8.

**<sup>19</sup>F NMR** (376 MHz, CDCl<sub>3</sub>) δ -124.21.

**HRMS** [M+Na]<sup>+</sup> calculated for C<sub>25</sub>H<sub>21</sub>FN<sub>2</sub>O<sub>4</sub>Na 455.1383 found 455.1385.

[α]<sub>D</sub><sup>25</sup> = -17.8 (*c* = 0.29, CH<sub>2</sub>Cl<sub>2</sub>).

**HPLC** analysis of the product: Daicel CHIRALPAK IC column; 10.0% *i*PrOH in hexanes; 1.0 mL/min; λ = 254 nm; retention times: 8.5 min (major), 12.2 min (minor).

**Methyl (*R*)-3-(((benzyloxy)carbonyl)amino)(4-bromophenyl)methyl)-7-chloroindolizine-2-carboxylate 7m**

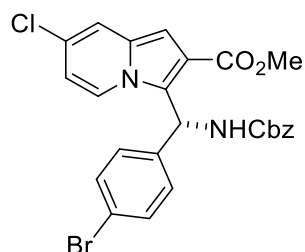

The product was prepared according to the **Procedure E** (reaction time = 72 h). Purification by Flash chromatography (90:10 hexane/ethyl acetate to 80:20 hexane/ethyl acetate + 0.25% Et<sub>3</sub>N).

Colorless oil, 80 mg, 38% yield, 26% e.e..



**<sup>1</sup>H NMR** (400 MHz, CDCl<sub>3</sub>) δ 7.99 (d, *J* = 7.7 Hz, 1H), 7.55 (d, *J* = 9.8 Hz, 1H), 7.45 – 7.28 (m, 8H), 7.02 (d, *J* = 8.5 Hz, 2H), 6.87 (s, 1H), 6.70 (d, *J* = 9.8 Hz, 1H), 6.57 (d, *J* = 7.7 Hz, 1H), 5.23 – 5.05 (m, 2H), 3.79 (s, 3H).

**<sup>13</sup>C NMR** (101 MHz, CDCl<sub>3</sub>) δ 166.0, 156.8, 138.7, 136.4, 131.7(2C), 131.4, 128.6(2C), 128.3, 128.2(2C), 127.9(2C), 127.7, 124.8, 122.9, 121.6, 118.9, 117.8, 114.9, 102.3, 67.3, 52.1, 49.0.

**HRMS** [M+Na]<sup>+</sup> calculated for C<sub>25</sub>H<sub>20</sub>N<sub>2</sub>O<sub>4</sub>ClBrNa 549.0193 found 549.0196.

**HPLC** analysis of the product: Daicel CHIRALPAK IC column; 10.0% *i*PrOH in hexanes; 1.0 mL/min; λ = 254 nm; retention times: 8.2 min (major), 10.9 min (minor).

**Methyl (*R*)-3-((((benzyloxy)carbonyl)amino)(2-bromophenyl)methyl)-1-(2,2,2-trifluoroacetyl)indolizine-2-carboxylate **8****

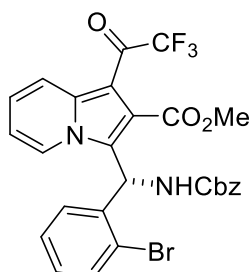

Under argon atmosphere at room temperature, **7j** (49.3 mg, 0.1 mmol) was dissolved in dichloromethane (2.0 mL), which was added *i*Pr<sub>2</sub>NEt (34.8 μL, 0.2 mmol). Then, TFAA (26.5 μL, 0.19 mmol) was added dropwise to the reaction mixture, which was further stirred at room temperature for 24 h. Another portions of *i*Pr<sub>2</sub>NEt (34.8 μL, 0.2 mmol) and TFAA (26.5 μL, 0.19 mmol) were added again to the reaction mixture, which was stirred for another 24 h. After the completion of the reaction indicated by TLC, the solvent was removed under reduced pressure, and the residue was purified by flash chromatography (80:20 hexane/dichloromethane + 0.25% Et<sub>3</sub>N) to give the product **8**.

Colorless oil, 47 mg, 80% yield, 93% e.e..

**<sup>1</sup>H NMR** (400 MHz, CDCl<sub>3</sub>) δ 8.32 (d, *J* = 6.9 Hz, 1H), 8.29 (d, *J* = 9.3 Hz, 1H), 7.55 (d, *J* = 7.9 Hz, 1H), 7.51 (d, *J* = 7.9 Hz, 1H), 7.45 – 7.28 (m, 7H), 7.23 – 7.15 (m, 1H), 7.11 – 7.02 (m, 1H), 6.69 (d, *J* = 9.3 Hz, 1H), 6.02 (d, *J* = 9.3 Hz, 1H), 5.23 – 5.08 (d, *J* = 2.4 Hz, 2H), 3.50 (s, 3H).

**<sup>13</sup>C NMR** (101 MHz, CDCl<sub>3</sub>) δ 174.6, 166.4, 155.7, 137.2, 136.2, 136.0, 133.4, 130.0, 129.2, 128.7(2C), 128.5, 128.3(2C), 127.6, 127.5, 127.1, 124.8, 124.1, 122.3, 120.4, 116.8, 115.9, 105.3, 67.7, 52.6, 50.3.

**<sup>19</sup>F NMR** (376 MHz, CDCl<sub>3</sub>) δ -73.58.

**HRMS**  $[M+Na]^+$  calculated for  $C_{27}H_{20}F_3BrN_2O_5Na$  611.0405 found 611.0397.

$[\alpha]^{25}_D = 50.7$  ( $c = 0.25$ ,  $CH_2Cl_2$ ).

**HPLC** analysis of the product: Daicel CHIRALPAK IC column; 10.0%  $i$ PrOH in hexanes; 1.0 mL/min;  $\lambda = 254$  nm; retention times: 12.8 min (major), 16.5 min (minor).

**(R)-3-((((benzyloxy)carbonyl)amino)(2-bromophenyl)methyl)indolizine-2-carboxylic acid 9**

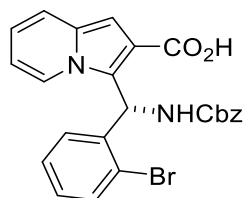

To a solution of **7j** (49.3 mg, 0.1 mmol) in THF (4 mL) and MeOH (4 mL) was added LiOH (33.5 mg, 1.4 mmol) in water (1 mL). After 5h of stirring at 70 °C, the solvent was completely evaporated under reduced pressure and the resulting residue was neutralized with 1M HCl to pH = 2-3). The solution was extracted with EtOAc (10 mL  $\times$  3), dried over  $Na_2SO_4$ , filtered and evaporated under reduced pressure. The residue was purified by flash chromatography (50:50 hexane/dichloromethane to 100% dichloromethane + 0.25%  $Et_3N$ ) to give the product **9**.

Colorless oil, 41 mg, 86% yield, 94% e.e..

**$^1H$  NMR** (400 MHz,  $CDCl_3$ )  $\delta$  8.15 (d,  $J = 7.3$  Hz, 1H), 7.51 (d,  $J = 7.9$  Hz, 1H), 7.47 – 7.37 (m, 2H), 7.36 – 7.27 (m, 5H), 7.23 – 7.13 (m, 1H), 7.11 – 7.03 (m, 1H), 6.98 (d,  $J = 9.7$  Hz, 1H), 6.94 (s, 1H), 6.83 (d,  $J = 9.7$  Hz, 1H), 6.78 – 6.62 (m, 2H), 5.23 – 5.01 (m, 2H).

**$^{13}C$  NMR** (126 MHz,  $CDCl_3$ )  $\delta$  170.2, 156.1, 137.7, 136.5, 133.4, 131.9, 129.7, 129.3, 128.6(2C), 128.3, 128.2(2C), 127.2, 127.1, 123.9, 123.1, 120.7, 118.6, 116.4, 113.4, 103.2, 67.3, 50.1.

**HRMS**  $[M+Na]^+$  calculated for  $C_{24}H_{19}BrN_2O_4Na$  501.0426 found 501.0425.

$[\alpha]^{25}_D = -74.8$  ( $c = 0.26$ ,  $CH_2Cl_2$ ).

**HPLC** analysis of the product: Daicel CHIRALPAK IC column; 5.0%  $i$ PrOH in hexanes; 1.0 mL/min;  $\lambda = 254$  nm; retention times: 20.4 min (major), 38.2 min (minor).

## 4. Synthesis of N-Boc amins

### 4.1. General procedure F for synthesis of N-Boc amins

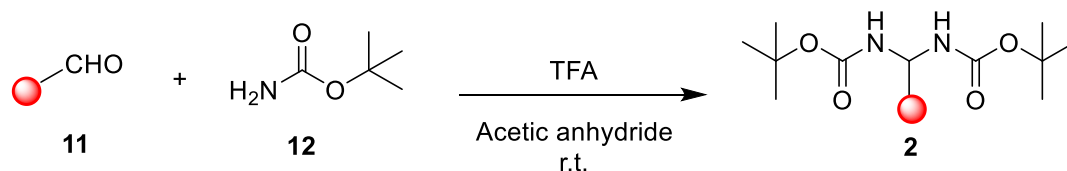

The *N*-Boc-protected amins **2** were synthesized according to the procedure in the literature.<sup>4</sup> Aldehyde (1 equiv.) and *tert*-butyl carbamate (1.67 equiv.) were added into acetic anhydride (0.2 mL/1 mmol of aldehyde). To this suspension was added trifluoroacetic acid (0.08 equiv.), and the mixture was stirred at room temperature until the product was solidified in acetic anhydride solvent as white solid. Then, it was filtered in vacuum, and washed several times with hexane. The *N*-Boc-protected amins **2** were obtained as a white powder.

### 4.2. General procedure G for synthesis of N-Cbz amins

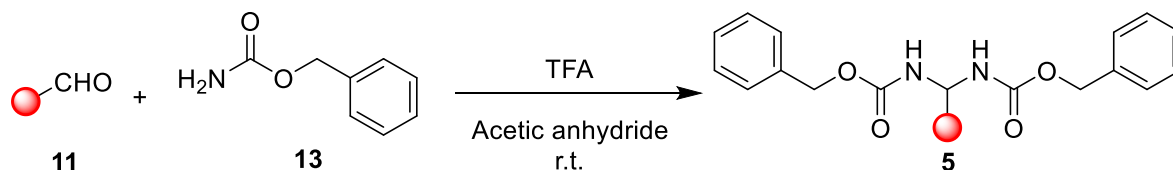

The *N*-Cbz-protected amins **5** were synthesized according to the procedure in the literature.<sup>4</sup> Aldehyde (1.0 equiv.) and benzyl carbamate (2.1 equiv.) were added into acetic anhydride (1 mL/3.33 mmol of aldehyde). To this suspension was added trifluoroacetic acid (0.1 equiv.), and the mixture was stirred at room temperature until the product was solidified in acetic anhydride solvent as white solid. Toluene was then added, and the product was collected by filtration. The white solid was washed two times with toluene and hexane, and recrystallized from toluene to give *N*-Cbz-protected amins **5** as a white powder.

### 4.3. N-Boc amins

#### di-*tert*-butyl (phenylmethylene)dicarbamate **2a**

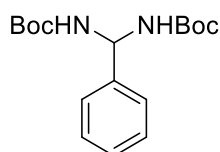

Following the **general procedure F** using benzaldehyde (5.77 mL, 56.54 mmol), *tert*-butyl carbamate (11.01 g, 93.98 mmol) and trifluoroacetic acid (357  $\mu$ L, 4.66 mmol) under stirring for 24 h in acetic anhydride (12.9 mL) solution, the *N*-Boc aminal was obtained as a white powder (6.82 g, 21.144 mmol, 45%).

**$^1\text{H}$  NMR** (400 MHz,  $\text{CDCl}_3$ )  $\delta$  7.42–7.27 (m, 5H), 6.10 (t,  $J$  = 8.0 Hz, 1H), 5.44 (bs, 2H), 1.44 (s, 18H).

**$^{13}\text{C}$  NMR** (101 MHz,  $\text{CDCl}_3$ )  $\delta$  154.9(2C), 140.0, 128.7(2C), 128.1, 125.9(2C), 80.3(2C), 61.8, 28.4(6C).

**HRMS**  $[\text{M}+\text{Na}]^+$  calculated for  $\text{C}_{17}\text{H}_{26}\text{N}_2\text{O}_4\text{Na}$  345.1790 found 345.1793.

**m.p.** 153–155  $^\circ\text{C}$ .

**di-*tert*-butyl (*p*-tolylmethylene)dicarbamate 2b**

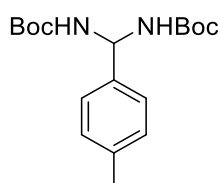

Following the **general procedure F** using 4-methylbenzaldehyde (2.0 g, 16.65 mmol), *tert*-butyl carbamate (3.25 g, 27.80 mmol) and trifluoroacetic acid (105  $\mu$ L, 1.38 mmol) under stirring for 46 h in acetic anhydride (3.8 mL) solution, the *N*-Boc aminal was obtained as a white powder (2.43 g, 7.23 mmol, 52%).

**$^1\text{H}$  NMR** (400 MHz,  $\text{CDCl}_3$ )  $\delta$  7.27 (d,  $J$  = 8.0 Hz, 2H), 7.15 (d,  $J$  = 8.0 Hz, 2H), 6.07 (t,  $J$  = 8.0 Hz, 1H), 5.38 (bs, 2H), 2.33 (s, 3H), 1.44 (s, 18H).

**$^{13}\text{C}$  NMR** (101 MHz,  $\text{CDCl}_3$ )  $\delta$  154.9(2C), 137.7, 137.0, 129.3(2C), 125.8(2C), 80.1(2C), 61.6, 28.4(6C), 21.1.

**HRMS**  $[\text{M}+\text{Na}]^+$  calculated for  $\text{C}_{18}\text{H}_{28}\text{N}_2\text{O}_4\text{Na}$  359.1947 found 359.1951.

**m.p.** 135–136  $^\circ\text{C}$ .

**di-*tert*-butyl ((4-(trifluoromethyl)phenyl)methylene)dicarbamate 2c**

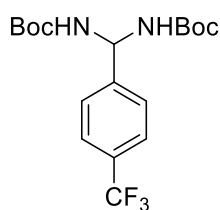

Following the **general procedure F** using 4-(Trifluoromethyl)benzaldehyde (5.00 g, 28.72 mmol), *tert*-butyl carbamate (5.62 g, 47.96 mmol) and trifluoroacetic acid (177  $\mu$ L, 2.31 mmol) under stirring for 18 h in acetic anhydride (6.5 mL) solution, the *N*-Boc aminal was obtained as a white powder (6.86 g, 17.57 mmol, 73 %).

**$^1\text{H}$  NMR** (500 MHz,  $\text{CDCl}_3$ )  $\delta$  7.59 (d,  $J$  = 8.2 Hz, 2H), 7.51 (d,  $J$  = 8.2 Hz, 2H), 6.14 – 6.03 (m, 1H), 5.82 (bs, 2H), 1.43 (s, 18H).

**$^{13}\text{C}$  NMR** (126 MHz,  $\text{CDCl}_3$ )  $\delta$  155.0(2C), 143.9, 130.3, 126.4(2C), 125.6(2C), 124.2, 80.7(2C), 61.3, 28.4(6C).

**$^{19}\text{F}$  NMR** (470 MHz,  $\text{CDCl}_3$ )  $\delta$  -62.60.

**HRMS**  $[\text{M}+\text{Na}]^+$  calculated for  $\text{C}_{18}\text{H}_{25}\text{N}_2\text{O}_4\text{F}_3\text{Na}$  413.1664 found 413.1665.

**m.p.** 154-155  $^\circ\text{C}$ .

**di-*tert*-butyl ((4-fluorophenyl)methylene)dicarbamate 2d**

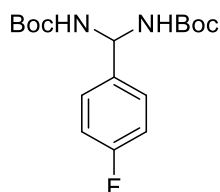

Following the **general procedure F** using 4-fluorobenzaldehyde (2.50 g, 20.14 mmol), *tert*-butyl carbamate (3.94 g, 33.64 mmol) and trifluoroacetic acid (128  $\mu$ L, 1.67 mmol) under stirring for 2 h in acetic anhydride (4.7 mL) solution, the *N*-Boc aminal was obtained as a white powder (3.25 g, 9.55 mmol, 57%).

**$^1\text{H}$  NMR** (500 MHz,  $\text{CDCl}_3$ )  $\delta$  7.36 (dd,  $J$  = 8.4, 5.2 Hz, 2H), 7.06 – 6.98 (m, 2H), 6.04 (t,  $J$  = 8.0 Hz, 1H), 5.59 (bs, 2H), 1.43 (s, 18H).

**$^{13}\text{C}$  NMR** (126 MHz,  $\text{CDCl}_3$ )  $\delta$  162.5, 154.9(2C), 135.8, 127.7, 115.5, 80.5(2C), 61.3, 28.4(6C).

**$^{19}\text{F}$  NMR** (470 MHz,  $\text{CDCl}_3$ )  $\delta$  -114.89.

**HRMS**  $[\text{M}+\text{Na}]^+$  calculated for  $\text{C}_{17}\text{H}_{25}\text{N}_2\text{O}_4\text{FNa}$  363.1696 found 363.1697.

**m.p.** 138-139  $^\circ\text{C}$ .

**di-*tert*-butyl ((4-chlorophenyl)methylene)dicarbamate 2e**

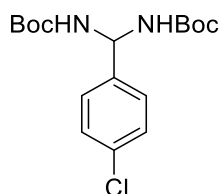

Following the **general procedure F** using 4-chlorobenzaldehyde (5.00 g, 35.57 mmol), *tert*-butyl carbamate (6.96 g, 59.40 mmol) and trifluoroacetic acid (227  $\mu$ L, 2.97 mmol) under stirring for 5 h in acetic anhydride (8.2 mL) solution, the *N*-Boc aminal was obtained as a white powder (6.66 g, 18.66 mmol, 63%).

**$^1\text{H}$  NMR** (200 MHz,  $\text{CDCl}_3$ )  $\delta$  7.46 – 7.15 (m, 4H), 6.02 (t,  $J$  = 8.0 Hz, 1H), 5.68 (bs, 2H), 1.43 (s, 18H).

**$^{13}\text{C}$  NMR** (50 MHz,  $\text{CDCl}_3$ )  $\delta$  154.9(2C), 138.5, 133.8, 128.7(2C), 127.4(2C), 80.5(2C), 61.2, 28.4(6C).

**HRMS**  $[\text{M}+\text{Na}]^+$  calculated for  $\text{C}_{17}\text{H}_{25}\text{N}_2\text{O}_4\text{ClNa}$  379.1401 found 379.1402.

**m.p.** 158-159  $^\circ\text{C}$ .

**di-*tert*-butyl ((4-bromophenyl)methylene)dicarbamate 2f**

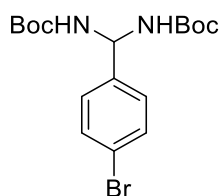

Following the **general procedure F** using 4-bromobenzaldehyde (2.5 g, 13.51 mmol), *tert*-butyl dicarbamate (2.65 g, 22.57 mmol) and trifluoroacetic acid (85  $\mu$ L, 1.12 mmol) under stirring for 28 h in acetic anhydride (3.1 mL) solution, the *N*-Boc aminal was obtained as a white powder (3.14 g, 7.83 mmol, 69%).

**$^1\text{H}$  NMR** (400 MHz,  $\text{CDCl}_3$ )  $\delta$  7.47 (d,  $J$  = 8.5 Hz, 2H), 7.28 (d,  $J$  = 8.5 Hz, 2H), 6.02 (t,  $J$  = 8.0 Hz, 1H), 5.63 (bs, 2H), 1.44 (s, 18H).

**$^{13}\text{C}$  NMR** (101 MHz,  $\text{CDCl}_3$ )  $\delta$  154.9, 139.1, 131.7, 127.8, 122.0, 80.5, 61.3, 28.4.

**HRMS**  $[\text{M}+\text{Na}]^+$  calculated for  $\text{C}_{17}\text{H}_{25}\text{N}_2\text{O}_4\text{BrNa}$  423.0895 found 423.0899.

**m.p.** 156-157  $^\circ\text{C}$ .

**di-*tert*-butyl ((4-iodophenyl)methylene)dicarbamate 2g**

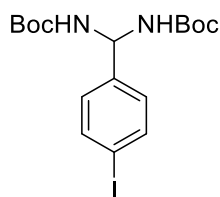

Following the **general procedure F** using 4-Iodobenzaldehyde (3.50 g, 15.09 mmol), *tert*-butyl carbamate (2.95 g, 25.19 mmol) and trifluoroacetic acid (95  $\mu$ L, 1.25 mmol) under stirring for 3 h in acetic anhydride (3.5 mL) solution, the *N*-Boc aminal was obtained as a white powder (3.93 g, 8.76 mmol, 70%).

**$^1\text{H}$  NMR** (500 MHz,  $\text{CDCl}_3$ )  $\delta$  7.66 (d,  $J$  = 8.2 Hz, 2H), 7.13 (d,  $J$  = 8.2 Hz, 2H), 6.07 – 5.91 (m, 1H), 5.66 (bs, 2H), 1.43 (s, 18H).

**$^{13}\text{C}$  NMR** (126 MHz,  $\text{CDCl}_3$ )  $\delta$  155.0(2C), 139.7, 137.7(2C), 128.0(2C), 93.7, 80.6(2C), 61.3, 28.4(6C).

**$^{19}\text{F}$  NMR** (470 MHz,  $\text{CDCl}_3$ )  $\delta$  -62.60.

**HRMS**  $[\text{M}+\text{Na}]^+$  calculated for  $\text{C}_{17}\text{H}_{25}\text{N}_2\text{O}_4\text{INa}$  471.0757 found 471.0763.

**m.p.** 154-155  $^\circ\text{C}$ .

**di-*tert*-butyl ([1,1'-biphenyl]-4-ylmethylene)dicarbamate 2h**

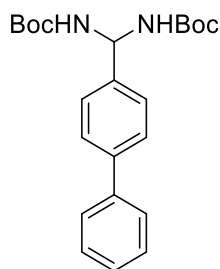

Following the **general procedure F** using biphenyl-4-carboxaldehyde (4.00 g, 21.95 mmol), *tert*-butyl carbamate (4.29 g, 36.66 mmol) and trifluoroacetic acid (136  $\mu$ L, 1.78 mmol) under stirring for 2 h in acetic anhydride (5.0 mL) solution, the *N*-Boc aminal was obtained as a white powder (5.67 g, 14.24 mmol, 78%).

**$^1\text{H}$  NMR** (500 MHz,  $\text{CDCl}_3$ )  $\delta$  7.61 – 7.55 (m, 4H), 7.49 – 7.41 (m, 4H), 7.35 (t,  $J$  = 7.4 Hz, 1H), 6.15 (t,  $J$  = 8.1 Hz, 1H), 5.63 (bs, 2H), 1.46 (s, 18H).

**$^{13}\text{C}$  NMR** (126 MHz,  $\text{CDCl}_3$ )  $\delta$  155.0(2C), 141.0, 140.7, 138.9, 128.9(2C), 127.5, 127.4(2C), 127.2(2C), 126.4(2C), 80.3(2C), 61.6, 28.5(6C).

**HRMS**  $[M+Na]^+$  calculated for  $C_{23}H_{30}N_2O_4Na$  421.2103 found 421.2108.

**m.p.** 170-171 °C.

**di-*tert*-butyl ((4-methoxyphenyl)methylene)dicarbamate 2i**

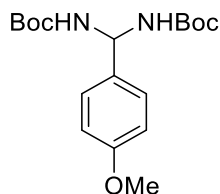

Following the **general procedure F** using 4-methoxybenzaldehyde (3.0 g, 22.03 mmol), *tert*-butyl carbamate (4.31 g, 36.79 mmol) and trifluoroacetic acid (139  $\mu$ L, 1.82 mmol) under stirring for 24 h in acetic anhydride (5.0 mL) solution, the *N*-Boc aminal was obtained as a white powder (2.92 g, 8.29 mmol, 45%).

**$^1H$  NMR** (400 MHz,  $CDCl_3$ )  $\delta$  7.30 (d,  $J$  = 8.3 Hz, 2H), 6.87 (d,  $J$  = 8.3 Hz, 2H), 6.05 (t,  $J$  = 7.9 Hz, 1H), 5.38 (bs, 2H), 3.79 (s, 3H), 1.44 (s, 18H).

**$^{13}C$  NMR** (50 MHz,  $CDCl_3$ )  $\delta$  159.3, 154.9(2C), 132.1, 127.1(2C), 114.0(2C), 80.2(2C), 61.5, 55.4, 28.4(6C).

**HRMS**  $[M+Na]^+$  calculated for  $C_{18}H_{28}N_2O_5Na$  375.1896 found 375.1899.

**m.p.** 134-135 °C.

**di-*tert*-butyl (*m*-tolylmethylene)dicarbamate 2j**

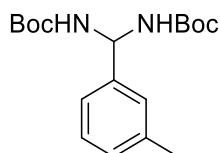

Following the **general procedure F** using 3-methylbenzaldehyde (4.0 g, 33.29 mmol), *tert*-butyl carbamate (6.51 g, 55.60 mmol) and trifluoroacetic acid (210  $\mu$ L, 2.76 mmol) under stirring for 24 h in acetic anhydride (7.6 mL) solution, the *N*-Boc aminal was obtained as a white powder (7.75 g, 23.05 mmol, 83%).

**$^1H$  NMR** (400 MHz,  $CDCl_3$ )  $\delta$  7.26 – 7.14 (m, 3H), 7.09 (d,  $J$  = 7.3 Hz, 1H), 6.07 (t,  $J$  = 8.0 Hz, 1H), 5.48 (bs, 2H), 2.34 (s, 3H), 1.44 (s, 18H).

**$^{13}C$  NMR** (101 MHz,  $CDCl_3$ )  $\delta$  154.9(2C), 139.9, 138.3, 128.8, 128.6, 126.7, 122.9, 80.2(2C), 61.8, 28.4(6C), 21.6.

**HRMS**  $[M+Na]^+$  calculated for  $C_{18}H_{28}N_2O_4Na$  359.1947 found 359.1949.



**m.p.** 161-162 °C.

**di-*tert*-butyl ((3-bromophenyl)methylene)dicarbamate 2k**

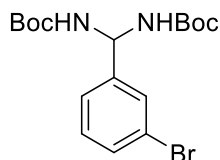

Following the **general procedure F** using 3-bromobenzaldehyde (3.80 g, 20.53 mmol), *tert*-butyl carbamate (4.02 g, 34.29 mmol) and trifluoroacetic acid (131  $\mu$ L, 1.71 mmol) under stirring for 2 h in acetic anhydride (4.7 mL) solution, the *N*-Boc aminal was obtained as a white powder (5.71 g, 14.23 mmol, 83%).

**$^1\text{H}$  NMR** (200 MHz,  $\text{CDCl}_3$ )  $\delta$  7.62 – 7.11 (m, 4H), 6.03 (t,  $J$  = 8.0 Hz, 1H), 5.60 (bs, 1H), 1.44 (s, 18H).

**$^{13}\text{C}$  NMR** (50 MHz,  $\text{CDCl}_3$ )  $\delta$  154.9(2C), 142.3, 131.1, 130.2, 129.2, 124.7, 122.8, 80.6(2C), 61.1, 28.4(6C).

**HRMS**  $[\text{M}+\text{Na}]^+$  calculated for  $\text{C}_{17}\text{H}_{25}\text{N}_2\text{O}_4\text{BrNa}$  423.0895 found 423.0895.

**m.p.** 148-149 °C.

**di-*tert*-butyl (furan-2-ylmethylene)dicarbamate 2l**

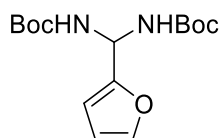

Following the **general procedure F** using 2-furaldehyde (2.0 g, 20.81 mmol), *tert*-butyl carbamate (4.07 g, 34.76 mmol) and trifluoroacetic acid (134  $\mu$ L, 1.75 mmol) under stirring for 2 h in acetic anhydride (4.8 mL) solution, the *N*-Boc aminal was obtained as a white powder (4.06 g, 13.01 mmol, 75%).

**$^1\text{H}$  NMR** (500 MHz,  $\text{CDCl}_3$ )  $\delta$  7.34 (bs, 1H), 6.32 (dd,  $J$  = 3.3, 1.8 Hz, 1H), 6.28 (d,  $J$  = 3.3 Hz, 1H), 6.11 (t,  $J$  = 8.5 Hz, 1H), 5.57 (bs, 2H), 1.44 (s, 18H).

**$^{13}\text{C}$  NMR** (126 MHz,  $\text{CDCl}_3$ )  $\delta$  154.6(2C), 151.9, 142.3, 110.6, 106.8, 80.5(2C), 56.9, 28.4(6C).

**HRMS**  $[\text{M}+\text{Na}]^+$  calculated for  $\text{C}_{15}\text{H}_{24}\text{N}_2\text{O}_5\text{Na}$  335.1583 found 335.1586.

**m.p.** 146-147 °C.

**di-*tert*-butyl (thiophen-2-ylmethylene)dicarbamate 2m**

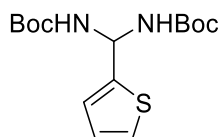

Following the **general procedure F** using 2-thiophenecarboxaldehyde (2.00 g, 17.83 mmol), *tert*-butyl carbamate (3.49 g, 29.78 mmol) and trifluoroacetic acid (114  $\mu$ L, 1.49 mmol) under stirring for 8 h in acetic anhydride (4.1 mL) solution, the *N*-Boc aminal was obtained as a white powder (2.01 g, 6.12 mmol, 41%).

**$^1\text{H}$  NMR** (500 MHz,  $\text{CDCl}_3$ )  $\delta$  7.21 (d,  $J$  = 4.7 Hz, 1H), 7.01 – 6.90 (m, 2H), 6.31 – 6.21 (m, 1H), 5.72 (bs, 2H), 1.45 (s, 18H).

**$^{13}\text{C}$  NMR** (126 MHz,  $\text{CDCl}_3$ )  $\delta$  154.7(2C), 144.6, 127.1, 125.2, 124.5, 80.5(2C), 58.9, 28.4(6C).

**HRMS**  $[\text{M}+\text{Na}]^+$  calculated for  $\text{C}_{15}\text{H}_{24}\text{N}_2\text{O}_4\text{SNa}$  351.1354 found 351.1355.

**m.p.** 133-134  $^\circ\text{C}$ .

#### 4.4. *N*-Cbz aminals

**dibenzyl (phenylmethylene)dicarbamate 5a**

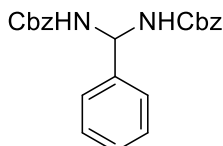

Following the **general procedure G** using benzaldehyde (4.08 mL, 40.00 mmol), benzyl carbamate (12.70 g, 84.00 mmol) and trifluoroacetic acid (306  $\mu$ L, 4.00 mmol) under stirring for 20 h in acetic anhydride (12.0 mL) solution, the *N*-Cbz aminal was obtained as a white powder (14.02 g, 35.91 mmol, 90% yield).

**$^1\text{H}$  NMR** (400 MHz,  $\text{CDCl}_3$ )  $\delta$  7.44 – 7.21 (m, 15H), 6.29 (t,  $J$  = 8.0 Hz, 1H), 5.80 (bs, 2H), 5.12 (d,  $J$  = 2.6 Hz, 4H).

**$^{13}\text{C}$  NMR** (101 MHz,  $\text{CDCl}_3$ )  $\delta$  155.5(2C), 138.9, 136.2(2C), 128.9(2C), 128.7(4C), 128.4, 128.3(4C), 128.3(2C), 125.9(2C), 67.2(2C), 62.2.

**HRMS**  $[\text{M}+\text{Na}]^+$  calculated for  $\text{C}_{23}\text{H}_{22}\text{N}_2\text{O}_4\text{Na}$  413.1477 found 413.1470.

**m.p.** 174-175  $^\circ\text{C}$ .

**dibenzyl ((4-fluorophenyl)methylene)dicarbamate 5b**

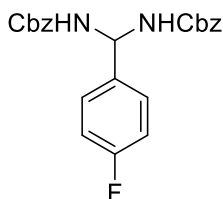

Following the **general procedure G** using 4-fluorobenzaldehyde (1.24 mL, 10.00 mmol), benzyl carbamate (3.17 g, 21.00 mmol) and trifluoroacetic acid (77  $\mu$ L, 1.00 mmol) under stirring for 1 h in acetic anhydride (3.0 mL) solution, the *N*-Cbz aminal was obtained as a white powder (1.63 g, 3.99 mmol, 40% yield).

**$^1\text{H}$  NMR** (400 MHz,  $\text{CDCl}_3$ )  $\delta$  7.32 (s, 12H), 7.05 – 6.95 (m, 2H), 6.24 (t,  $J$  = 8.0 Hz, 1H), 5.97 (bs, 2H), 5.17 – 5.03 (m, 4H).

**$^{13}\text{C}$  NMR** (101 MHz,  $\text{CDCl}_3$ )  $\delta$  162.7, 155.5(2C), 136.1(2C), 134.8, 128.7(4C), 128.4(2C), 128.3(4C), 127.8(2C), 115.7(2C), 67.3(2C), 61.7.

**$^{19}\text{F}$  NMR** (376 MHz,  $\text{CDCl}_3$ )  $\delta$  -114.02.

**HRMS**  $[\text{M}+\text{Na}]^+$  calculated for  $\text{C}_{23}\text{H}_{21}\text{N}_2\text{O}_4\text{FNa}$  431.1383 found 431.1376.

**m.p.** 189-190  $^\circ\text{C}$ .

**dibenzyl ((4-chlorophenyl)methylene)dicarbamate 5c**

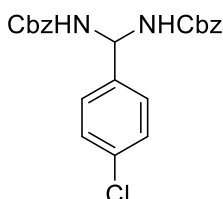

Following the **general procedure G** using 4-chlorobenzaldehyde (2.11 g, 15.00 mmol), benzyl carbamate (4.76 g, 31.50 mmol) and trifluoroacetic acid (115  $\mu$ L, 1.50 mmol) under stirring for 1 h in acetic anhydride (4.5 mL) solution, the *N*-Cbz aminal was obtained as a white powder (1.63 g, 8.71 mmol, 58% yield).

**$^1\text{H}$  NMR** (400 MHz,  $\text{CDCl}_3$ )  $\delta$  7.42 – 7.27 (m, 14H), 6.21 (t,  $J$  = 8.0 Hz, 1H), 5.92 (bs, 2H), 5.16 – 5.06 (m, 4H).

**$^{13}\text{C}$  NMR** (101 MHz,  $\text{CDCl}_3$ )  $\delta$  155.5(2C), 137.5, 136.0(2C), 134.4, 129.0(2C), 128.7(4C), 128.5(2C), 128.3(4C), 127.4(2C), 67.4(2C), 61.7.

**HRMS**  $[\text{M}+\text{Na}]^+$  calculated for  $\text{C}_{23}\text{H}_{21}\text{N}_2\text{O}_4\text{ClNa}$  447.1088 found 447.1089.

**m.p.** 190-191 °C.

**dibenzyl ((4-bromophenyl)methylene)dicarbamate 5d**

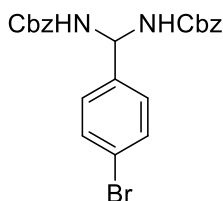

Following the **general procedure G** using 4-bromobenzaldehyde (2.78 g, 15.03 mmol), benzyl carbamate (4.76 g, 31.50 mmol) and trifluoroacetic acid (115  $\mu$ L, 1.50 mmol) under stirring for 24 h in acetic anhydride (4.5 mL) solution, the *N*-Cbz aminal was obtained as a white powder (4.16 g, 8.86 mmol, 59% yield).

**$^1\text{H}$  NMR** (400 MHz,  $\text{CDCl}_3$ )  $\delta$  7.46 (d,  $J$  = 8.1 Hz, 2H), 7.42 – 7.19 (m, 12H), 6.18 (t,  $J$  = 8.0 Hz, 1H), 5.88 (bs, 2H), 5.18 – 5.05 (m, 4H).

**$^{13}\text{C}$  NMR** (101 MHz,  $\text{CDCl}_3$ )  $\delta$  155.5(2C), 138.0, 136.0(2C), 132.0(2C), 128.7(4C), 128.5(2C), 128.3(4C), 127.8(2C), 122.5, 67.4(2C), 61.8.

**HRMS**  $[\text{M}+\text{Na}]^+$  calculated for  $\text{C}_{23}\text{H}_{21}\text{N}_2\text{O}_4\text{BrNa}$  491.0582 found 491.0583.

**m.p.** 191-192 °C.

**dibenzyl ((4-(trifluoromethyl)phenyl)methylene)dicarbamate 5e**

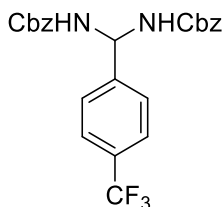

Following the **general procedure G** using 4-(trifluoromethyl)benzaldehyde (1.74 g, 10.00 mmol), benzyl carbamate (3.17 g, 21.00 mmol) and trifluoroacetic acid (77  $\mu$ L, 1.00 mmol) under stirring for 24 h in acetic anhydride (3.0 mL) solution, the *N*-Cbz aminal was obtained as a white powder (4.48 g, 9.77 mmol, 98% yield).

**$^1\text{H}$  NMR** (400 MHz,  $\text{CDCl}_3$ )  $\delta$  7.59 (d,  $J$  = 8.2 Hz, 2H), 7.50 (d,  $J$  = 8.2 Hz, 2H), 7.42 – 7.19 (m, 10H), 6.25 (t,  $J$  = 7.9 Hz, 1H), 6.04 (bs, 2H), 5.19 – 5.03 (m, 4H).

**$^{13}\text{C}$  NMR** (101 MHz,  $\text{CDCl}_3$ )  $\delta$  155.6(2C), 142.8, 136.0(2C), 130.7, 128.7(4C), 128.5(2C), 128.3(4C), 126.5(2C), 125.8(2C), 124.1, 67.5(2C), 61.8.

**$^{19}\text{F}$  NMR** (376 MHz,  $\text{CDCl}_3$ )  $\delta$  -62.65.

**HRMS**  $[\text{M}+\text{Na}]^+$  calculated for  $\text{C}_{24}\text{H}_{21}\text{N}_2\text{O}_4\text{F}_3\text{Na}$  481.1351 found 481.1357.

**m.p.** 204-205 °C.

**dibenzyl ((4-cyanophenyl)methylene)dicarbamate 5f**

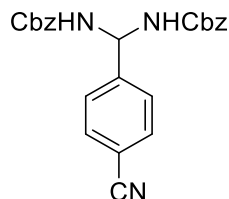

Following the **general procedure G** using 4-cyanobenzaldehyde (1.31 g, 10.00 mmol), benzyl carbamate (3.17 g, 21.00 mmol) and trifluoroacetic acid (77  $\mu$ L, 1.00 mmol) under stirring for 24 h in acetic anhydride (3.0 mL) solution, the *N*-Cbz aminal was obtained as a white powder (3.80 g, 9.15 mmol, 92% yield).

**$^1\text{H}$  NMR** (400 MHz,  $\text{CDCl}_3$ )  $\delta$  7.63 (d,  $J$  = 8.1 Hz, 2H), 7.50 (d,  $J$  = 8.1 Hz, 2H), 7.44 – 7.27 (m, 10H), 6.21 (t,  $J$  = 8.1 Hz, 1H), 6.03 (bs, 2H), 5.17 – 5.03 (m, 4H).

**$^{13}\text{C}$  NMR** (101 MHz,  $\text{CDCl}_3$ )  $\delta$  155.6(2C), 144.1, 135.8(2C), 132.6(2C), 128.7(4C), 128.6(2C), 128.3(4C), 126.9(2C), 118.5, 112.3, 67.6(2C), 61.7.

**HRMS**  $[\text{M}+\text{Na}]^+$  calculated for  $\text{C}_{24}\text{H}_{21}\text{N}_3\text{O}_4\text{Na}$  438.1430 found 438.1434.

**m.p.** 187-188 °C.

**dibenzyl ((4-nitrophenyl)methylene)dicarbamate 5g**

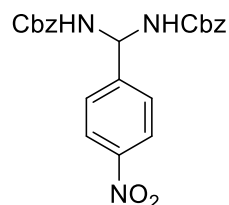

Following the **general procedure G** using 4-nitrobenzaldehyde (0.76 g, 5.00 mmol), benzyl carbamate (1.59 g, 10.50 mmol) and trifluoroacetic acid (38  $\mu$ L, 0.50 mmol) under stirring for 24 h in acetic anhydride (1.5 mL) solution, the *N*-Cbz aminal was obtained as a white powder (1.90 g, 4.36 mmol, 87% yield).

**$^1\text{H}$  NMR** (400 MHz,  $\text{DMSO}-d_6$ )  $\delta$  8.30 (bs, 2H), 8.21 (d,  $J$  = 8.8 Hz, 2H), 7.66 (d,  $J$  = 8.8 Hz, 2H), 7.46 – 7.24 (m, 10H), 6.33 (t,  $J$  = 8.1 Hz, 1H), 5.07 (s, 4H).

**$^{13}\text{C}$  NMR** (101 MHz,  $\text{DMSO}-d_6$ )  $\delta$  155.3(2C), 147.22, 147.16, 136.8(2C), 128.4(4C), 128.0(2C), 127.94(4C), 127.88(2C), 123.5(2C), 65.8(2C), 61.4.

**HRMS**  $[\text{M}+\text{Na}]^+$  calculated for  $\text{C}_{23}\text{H}_{21}\text{N}_3\text{O}_6\text{Na}$  458.1328 found 458.1331.

**m.p.** 197-198 °C.

**dibenzyl ((2-fluorophenyl)methylene)dicarbamate 5h**

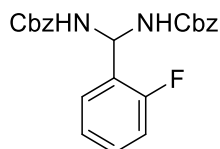

Following the **general procedure G** using 2-fluorobenzaldehyde (3.10 g, 25.00 mmol), benzyl carbamate (7.94 g, 52.50 mmol) and trifluoroacetic acid (191  $\mu$ L, 2.50 mmol) under stirring for 24 h in acetic anhydride (7.5 mL) solution, the *N*-Cbz aminal was obtained as a white powder (7.34 g, 17.98 mmol, 72% yield).

**$^1\text{H}$  NMR** (400 MHz,  $\text{CDCl}_3$ )  $\delta$  7.48 – 7.28 (m, 12H), 7.17 – 7.03 (m, 2H), 6.51 (t,  $J$  = 8.3 Hz, 1H), 5.87 (bs, 2H), 5.16 – 5.04 (m, 4H).

**$^{13}\text{C}$  NMR** (101 MHz,  $\text{CDCl}_3$ )  $\delta$  160.4, 155.1(2C), 136.1(2C), 130.4, 128.65(4C), 128.58, 128.4(2C), 128.3(4C), 126.3, 124.6, 116.1, 67.3(2C), 59.2.

**$^{19}\text{F}$  NMR** (376 MHz,  $\text{CDCl}_3$ )  $\delta$  -117.92.

**HRMS**  $[\text{M}+\text{Na}]^+$  calculated for  $\text{C}_{23}\text{H}_{21}\text{N}_2\text{O}_4\text{FNa}$  431.1383 found 431.1382.

**m.p.** 174-175 °C.

**dibenzyl ((2-chlorophenyl)methylene)dicarbamate 5i**

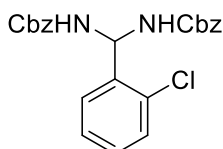

Following the **general procedure G** using 2-chlorobenzaldehyde (1.41 g, 10.03 mmol), benzyl dicarbamate (3.17 g, 21.00 mmol) and trifluoroacetic acid (77  $\mu$ L, 1.00 mmol) under stirring for 24 h in acetic anhydride (3.0 mL) solution, the *N*-Cbz aminal was obtained as a white powder (2.15 g, 5.06 mmol, 51% yield).

**$^1\text{H}$  NMR** (400 MHz,  $\text{CDCl}_3$ )  $\delta$  7.56 – 7.45 (m, 1H), 7.43 – 7.23 (m, 13H), 6.55 (t,  $J$  = 8.1 Hz, 1H), 5.99 (bs, 2H), 5.16 – 5.04 (m, 4H).

**$^{13}\text{C}$  NMR** (101 MHz,  $\text{CDCl}_3$ )  $\delta$  155.1(2C), 136.2, 136.1(2C), 132.5, 130.4, 129.9, 128.7(4C), 128.5, 128.4(2C), 128.3(4C), 127.2, 67.3(2C), 61.0.

**HRMS**  $[\text{M}+\text{Na}]^+$  calculated for  $\text{C}_{23}\text{H}_{21}\text{N}_2\text{O}_4\text{ClNa}$  447.1088 found 447.1086.

**m.p.** 164-165 °C.

**dibenzyl ((2-bromophenyl)methylene)dicarbamate 5j**

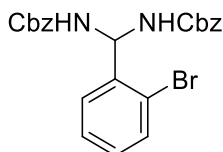

Following the **general procedure G** using 2-bromobenzaldehyde (0.56 g, 3.03 mmol), benzyl carbamate (0.95 g, 6.30 mmol) and trifluoroacetic acid (23  $\mu$ L, 0.30 mmol) under stirring for 24 h in acetic anhydride (0.9 mL) solution, the *N*-Cbz aminal was obtained as a white powder (0.93 g, 1.98 mmol, 65% yield).

**$^1\text{H}$  NMR** (400 MHz, Chloroform-*d*)  $\delta$  7.57 (d,  $J$  = 7.9, 1H), 7.50 (d,  $J$  = 7.6 Hz, 1H), 7.40 – 7.27 (m, 11H), 7.19 (ddd,  $J$  = 7.7, 7.6 Hz, 1.7 Hz, 1H), 6.50 (t,  $J$  = 7.9 Hz, 1H), 6.00 (bs, 2H), 5.17 – 5.04 (m, 4H).

**$^{13}\text{C}$  NMR** (101 MHz,  $\text{CDCl}_3$ )  $\delta$  155.1(2C), 137.8, 136.1(2C), 133.6, 130.2, 128.6(4C), 128.5, 128.35(2C), 128.27(4C), 127.8, 122.5, 67.3(2C), 62.6.

**HRMS**  $[\text{M}+\text{Na}]^+$  calculated for  $\text{C}_{23}\text{H}_{21}\text{N}_2\text{O}_4\text{BrNa}$  491.0582 found 491.0583.

**m.p.** 168-169 °C.

**dibenzyl (thiophen-2-ylmethylene)dicarbamate 5k**

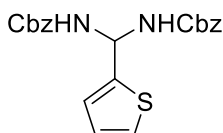

Following the **general procedure G** using 2-thiophenecarboxaldehyde (1.12 g, 10.00 mmol), benzyl carbamate (3.17 g, 21.00 mmol) and trifluoroacetic acid (77  $\mu$ L, 1.00 mmol) under stirring for 24 h in acetic anhydride (3.0 mL) solution, the *N*-Cbz aminal was obtained as a white powder (3.24 g, 8.17 mmol, 82% yield).

**$^1\text{H}$  NMR** (400 MHz,  $\text{CDCl}_3$ )  $\delta$  7.44 – 7.27 (s, 10H), 7.24 (dd,  $J$  = 5.1, 1.3 Hz, 1H), 7.01 (d,  $J$  = 3.6 Hz, 1H), 6.96 (dd,  $J$  = 5.1, 3.6 Hz, 1H), 6.47 (t,  $J$  = 8.3 Hz, 1H), 5.92 (bs, 2H), 5.20 – 5.07 (m, 4H).

**$^{13}\text{C}$  NMR** (101 MHz,  $\text{CDCl}_3$ )  $\delta$  155.2(2C), 143.3, 136.1(2C), 128.7(4C), 128.4(2C), 128.3(4C), 127.3, 125.7, 125.0, 67.4(2C), 59.5.

**HRMS**  $[\text{M}+\text{Na}]^+$  calculated for  $\text{C}_{21}\text{H}_{20}\text{N}_2\text{O}_4\text{SNa}$  419.1041 found 419.1044.

**m.p.** 184-185 °C.

## 5. Synthesis of indolizines

### methyl indolizine-2-carboxylate 1a

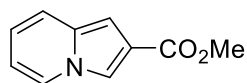

Under inert atmosphere, a round bottom flask was charged with 2-formyl pyridine (11.0 g, 102.70 mmol) and methyl acrylate (19.42 mL, 215.67 mmol). To this solution was added diazo[2.2.2]bicyclooctane (1.70 g, 15.15 mmol). The reaction mixture was stirred at room temperature for 21 h, after which the reaction mixture was filtered through silica using hexane and ethyl acetate as eluent. The solvent was removed and the residue was dissolved in 50 mL acetic anhydride. The solution was heated to 130 °C for 3 h. The acetic anhydride and acetic acid were removed on vacuo. The remaining solid was purified by flash chromatography (95:05 hexane/dichloromethane to 85:15 hexane/dichloromethane). Then recrystallization in hexane/dichloromethane to give the product as white powder (8.21 g, 46%).<sup>14</sup>

**<sup>1</sup>H NMR** (500 MHz, CDCl<sub>3</sub>)  $\delta$  7.83 (d,  $J$  = 7.1 Hz, 1H), 7.78 (s, 1H), 7.34 (d,  $J$  = 9.1 Hz, 1H), 6.81 (s, 1H), 6.66 (ddd,  $J$  = 9.1, 6.5, 1.0 Hz, 1H), 6.54 – 6.48 (m, 1H), 3.88 (s, 3H).

**<sup>13</sup>C NMR** (126 MHz, CDCl<sub>3</sub>)  $\delta$  165.7, 132.9, 125.4, 120.4, 119.7, 118.2, 116.0, 112.4, 100.5, 51.5.

**HRMS** [M+H]<sup>+</sup> calculated for C<sub>10</sub>H<sub>10</sub>NO<sub>2</sub> 176.0712 found 176.0715.

**m.p.** 101-102 °C.

### methyl 6-chloroindolizine-2-carboxylate 1b

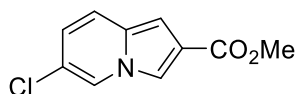

Under inert atmosphere, a round bottom flask was charged with 5-chloro-2-formyl pyridine (3.50 g, 24.72 mmol) and methyl acrylate (5.36 mL, 59.52 mmol). To this solution was added diazo[2.2.2]bicyclooctane (0.33 g, 2.97 mmol). The reaction mixture was stirred at room temperature for 18 h, after which it was purified by flash chromatography (70:30 hexane/ethyl acetate). The solvent was removed and the residue was dissolved in 25 mL of acetic anhydride. The solution was heated to 135 °C for 3 h. The acetic anhydride and acetic acid were removed on vacuo. The remaining solid was purified by flash chromatography (95:05 hexane/dichloromethane to 80:20 hexane/dichloromethane) to give the product as white powder (3.63 g, 70%).



**<sup>1</sup>H NMR** (500 MHz, CDCl<sub>3</sub>) δ 7.91 (s, 1H), 7.75 (s, 1H), 7.31 (d, *J* = 9.5 Hz, 1H), 6.86 (s, 1H), 6.65 (d, *J* = 9.5 Hz, 1H), 3.88 (s, 3H).

**<sup>13</sup>C NMR** (126 MHz, CDCl<sub>3</sub>) δ 165.2, 131.2, 123.0, 120.9(2C), 120.6, 120.0, 116.4, 101.9, 51.7.

**HRMS** [M+H]<sup>+</sup> calculated for C<sub>10</sub>H<sub>9</sub>NO<sub>2</sub>Cl 210.0322 found 210.0325.

**m.p.** 109-110 °C.

**methyl 7-chloroindolizine-2-carboxylate 1c**

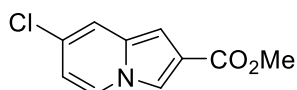

Under inert atmosphere, a round bottom flask was charged with 4-chloro-2-formyl pyridine (6.50 g, 45.92 mmol) and methyl acrylate (9.92 mL, 110.20 mmol). To this solution was added diazo[2.2.2]bicyclooctane (0.62 g, 5.51 mmol). The reaction mixture was stirred at room temperature for 16 h, after which it was purified by flash chromatography (75:25 hexane/ethyl acetate). The solvent was removed and the residue was dissolved in 46 mL acetic anhydride. The solution was heated to 140°C for 6 h. The acetic anhydride and acetic acid were removed on vacuo. The remaining solid was purified by flash chromatography (90:10 hexane/dichloromethane to 80:20 hexane/dichloromethane) to give the product as white powder (6.03 g, 63%).

**<sup>1</sup>H NMR** (500 MHz, CDCl<sub>3</sub>) δ 7.79 – 7.72 (m, 2H), 7.32 (s, 1H), 6.75 (s, 1H), 6.48 (dd, *J* = 7.4, 2.1 Hz, 1H), 3.87 (s, 3H).

**<sup>13</sup>C NMR** (126 MHz, CDCl<sub>3</sub>) δ 165.2, 132.5, 126.1, 124.5, 120.9, 118.7, 116.4, 114.0, 100.7, 51.7.

**HRMS** [M+H]<sup>+</sup> calculated for C<sub>10</sub>H<sub>9</sub>NO<sub>2</sub>Cl 210.0322 found 210.0331.

**m.p.** 129-130 °C.

**methyl 8-fluoroindolizine-2-carboxylate 1d**

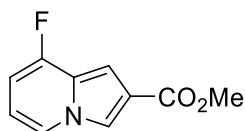

Under inert atmosphere, a round bottom flask was charged with 3-Fluoropicolinaldehyde (2.00 g, 16.00 mmol) and methyl acrylate (3.04 mL, 33.60 mmol). To this solution was added diazo[2.2.2]bicyclooctane (0.22 g, 1.90 mmol). The reaction mixture was stirred at room temperature for 16 h, after which it was purified by flash chromatography (70:30 hexane/dichloromethane). The

product was dissolved in 16 mL acetic anhydride. The solution was heated to 120 °C for 7 h. The acetic anhydride and acetic acid were removed on vacuo. The remaining solid was purified by flash chromatography (90:10 hexane/dichloromethane) to give the product as white powder (2.28 g, 74%).

**<sup>1</sup>H NMR** (400 MHz, CDCl<sub>3</sub>) δ 7.85 (dd, *J* = 2.9, 1.5 Hz, 1H), 7.67 (d, *J* = 6.9 Hz, 1H), 6.98 (s, 1H), 6.49 – 6.42 (m, 1H), 6.36 (dd, *J* = 10.5, 6.9 Hz, 1H), 3.88 (s, 3H).

**<sup>13</sup>C NMR** (101 MHz, CDCl<sub>3</sub>) δ 165.1, 155.1, 125.7, 121.8, 120.1, 117.7, 111.5, 100.3, 98.5 (d, *J* = 3.2 Hz), 51.7.

**<sup>19</sup>F NMR** (376 MHz, CDCl<sub>3</sub>) δ -124.50.

**HRMS** [M+H]<sup>+</sup> calculated for C<sub>10</sub>H<sub>9</sub>NO<sub>2</sub>F 194.0617 found 194.0626.

**m.p.** 79-80 °C.

## 6. $^1\text{H}$ , $^{13}\text{C}$ and $^{19}\text{F}$ NMR Spectra

### 6.1. Products with Boc-protecting group 3a-s, 4a-s and 10

$^1\text{H}$  NMR spectrum of compound 4a ( $\text{CDCl}_3$ , 600 MHz).

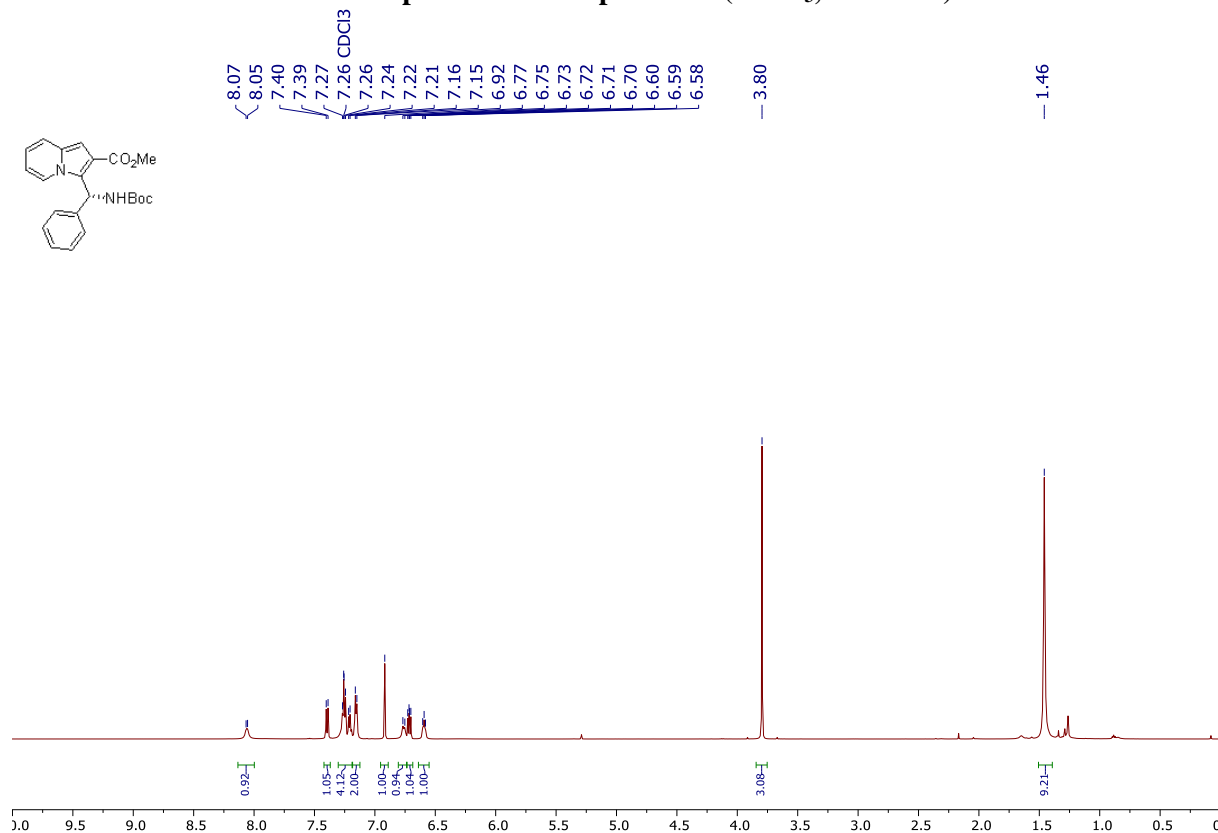

$^{13}\text{C}$  NMR spectrum of compound 4a ( $\text{CDCl}_3$ , 151 MHz)

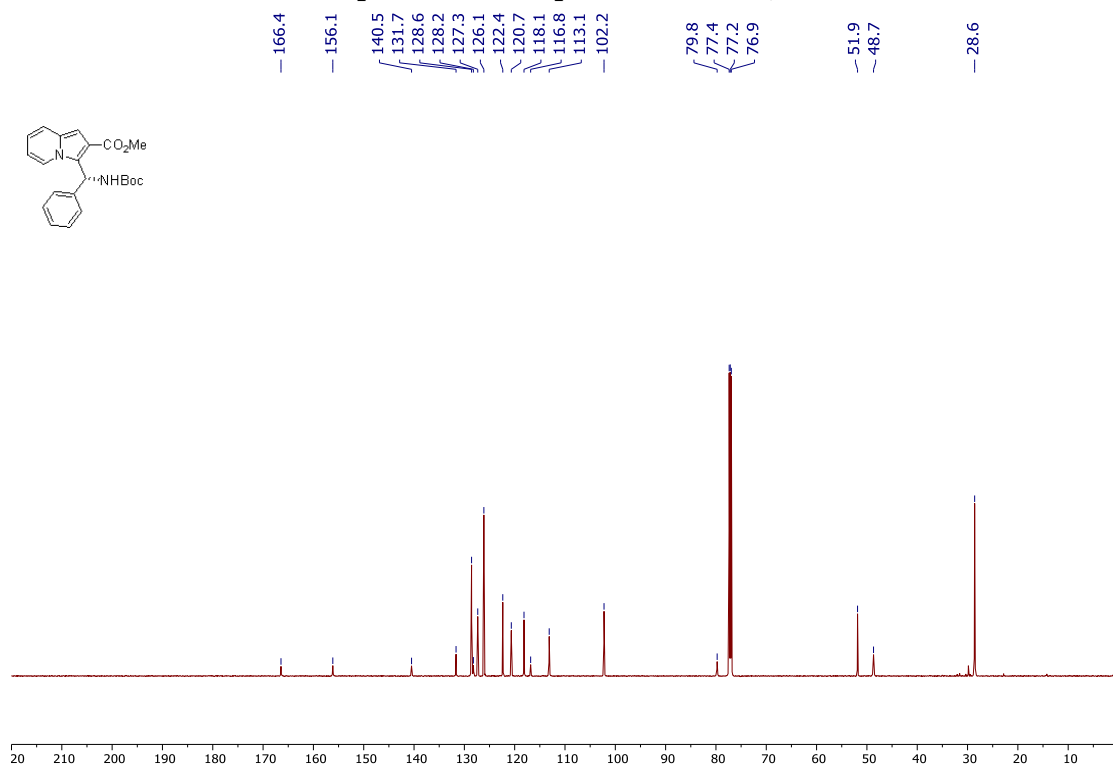

**$^1\text{H}$  NMR spectrum of compound 3a ( $\text{CDCl}_3$ , 600 MHz)**

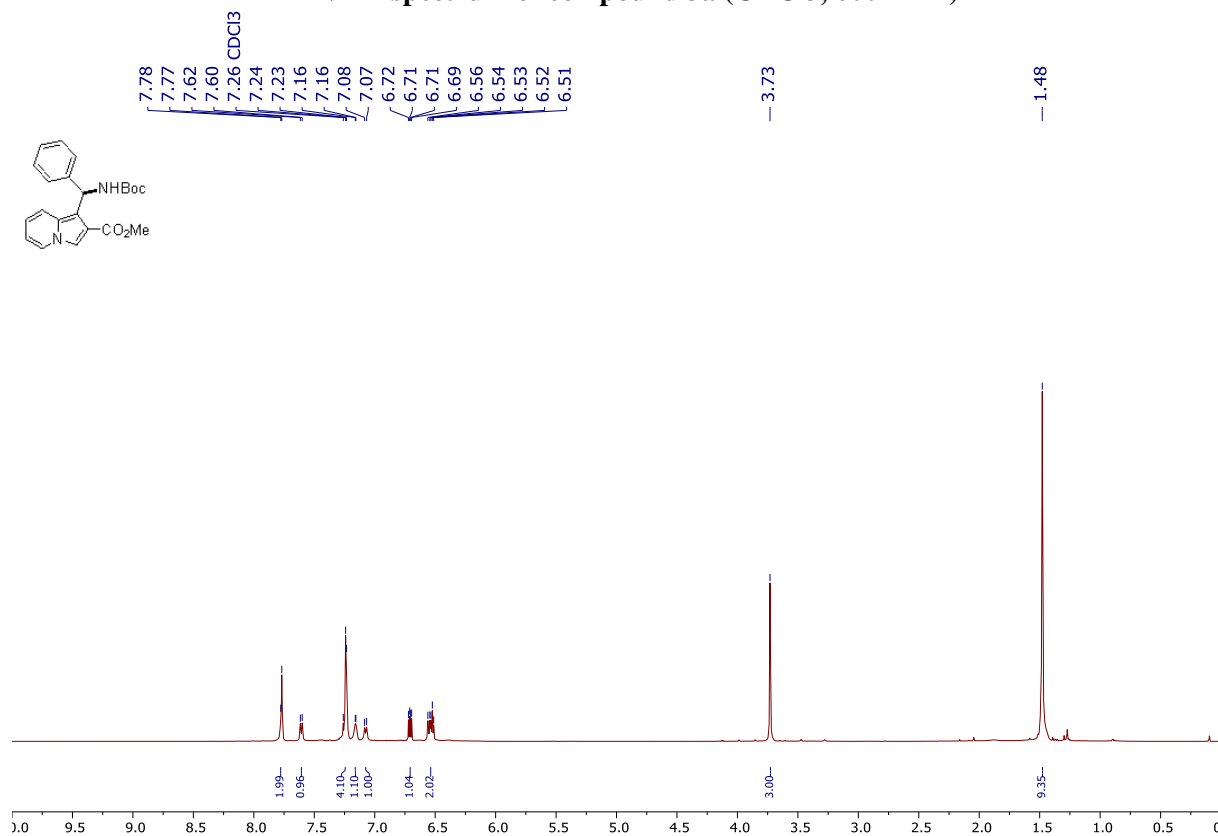

**$^{13}\text{C}$  NMR spectrum of compound 3a ( $\text{CDCl}_3$ , 151 MHz)**

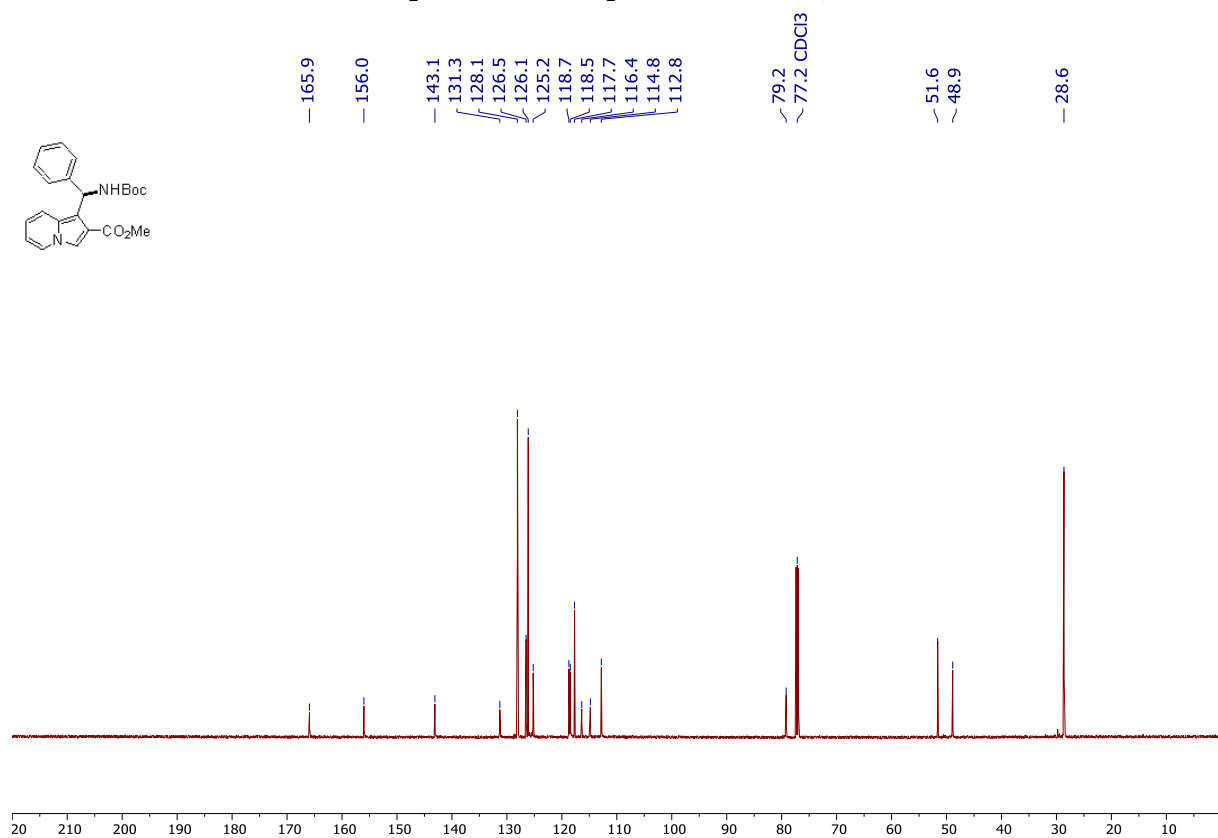

**<sup>1</sup>H NMR spectrum of compound 4b (CDCl<sub>3</sub>, 400 MHz)**

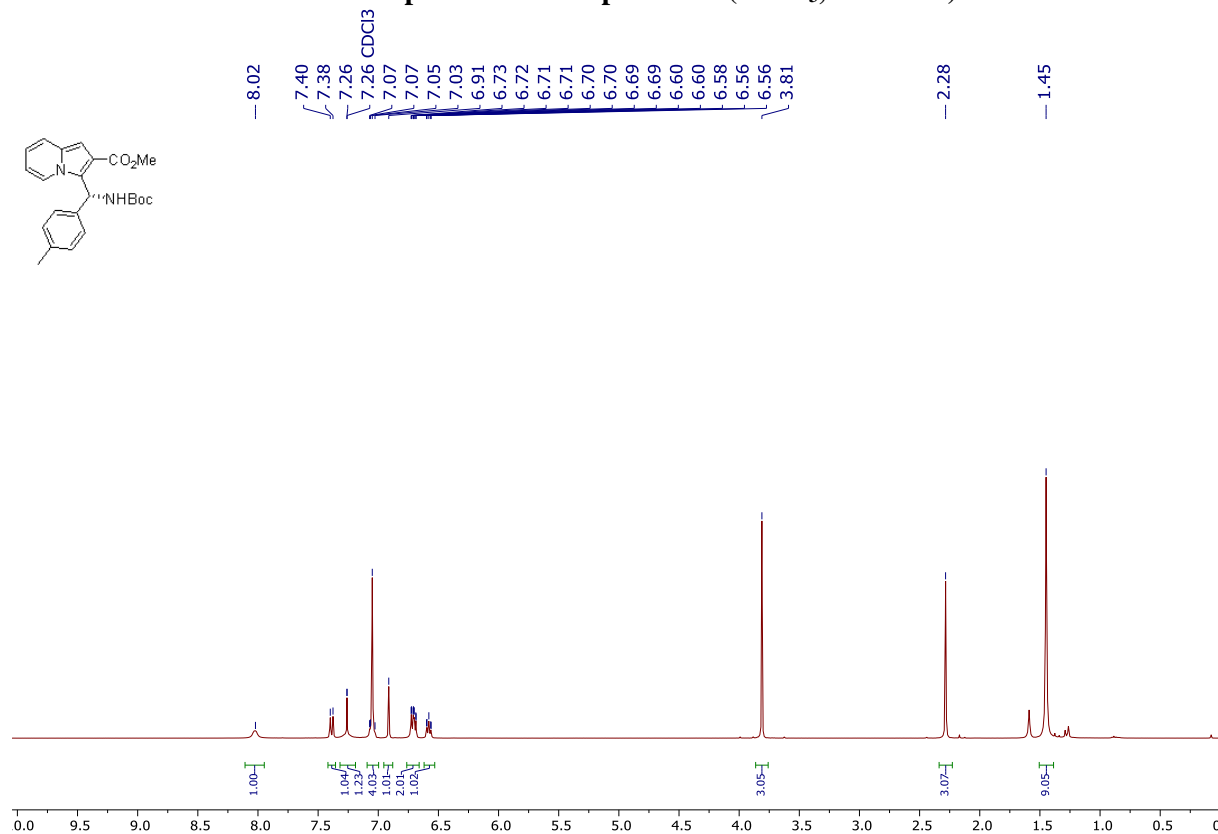

**<sup>13</sup>C NMR spectrum of compound 4b (CDCl<sub>3</sub>, 101 MHz)**

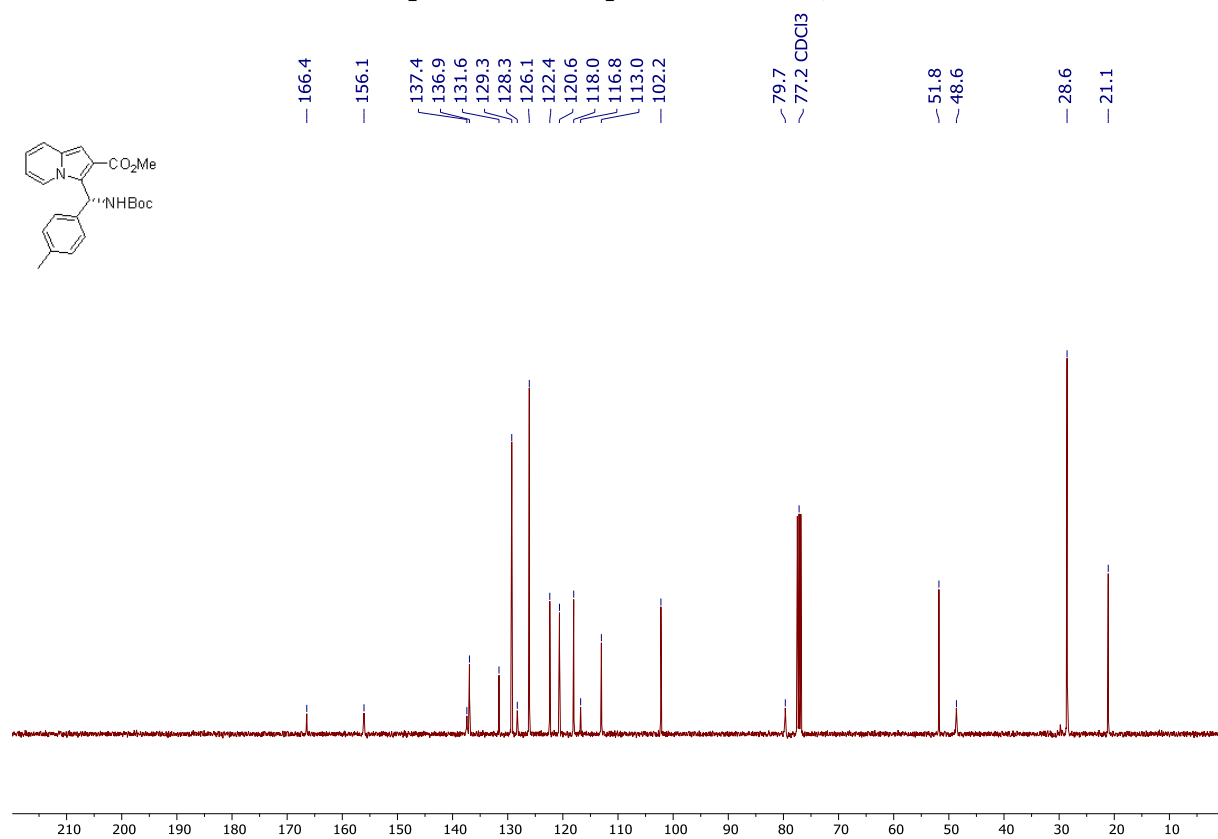

**<sup>1</sup>H NMR spectrum of compound 3b (CDCl<sub>3</sub>, 400 MHz)**

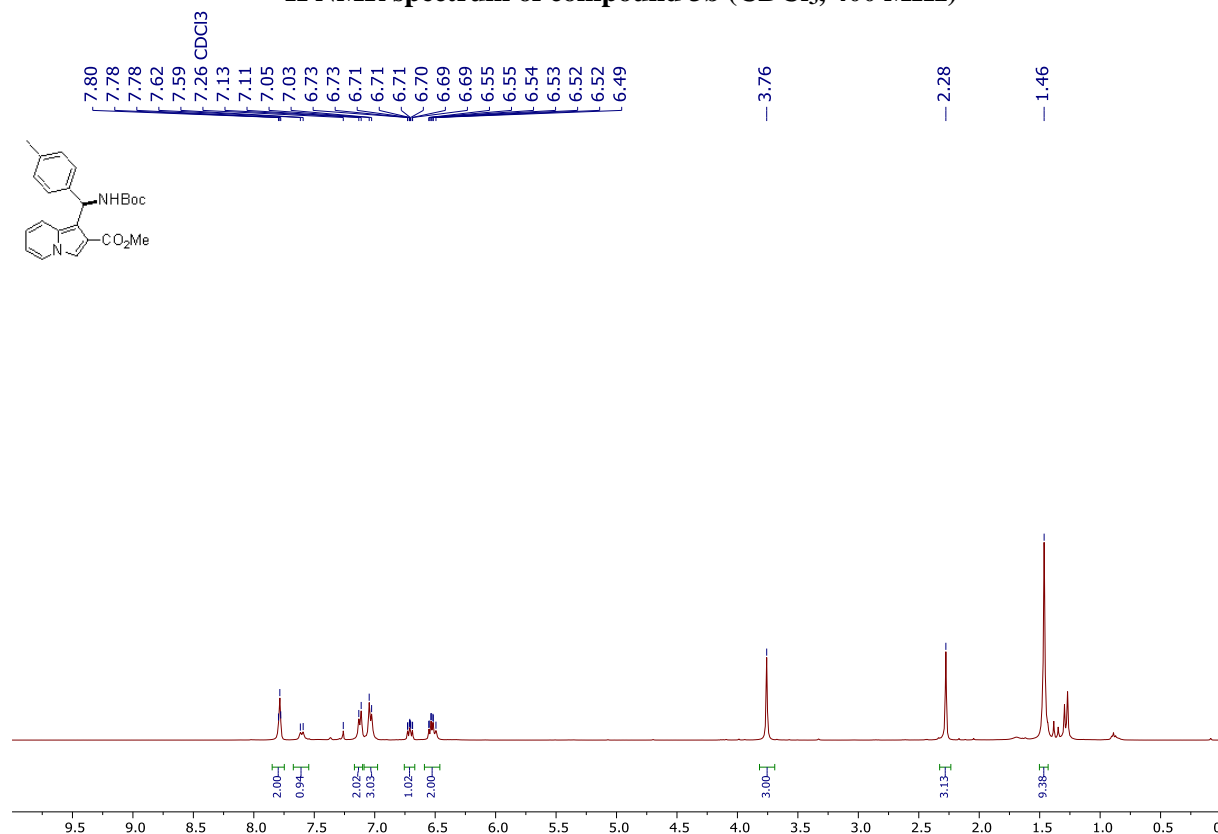

**<sup>13</sup>C NMR spectrum of compound 3b (CDCl<sub>3</sub>, 101 MHz)**

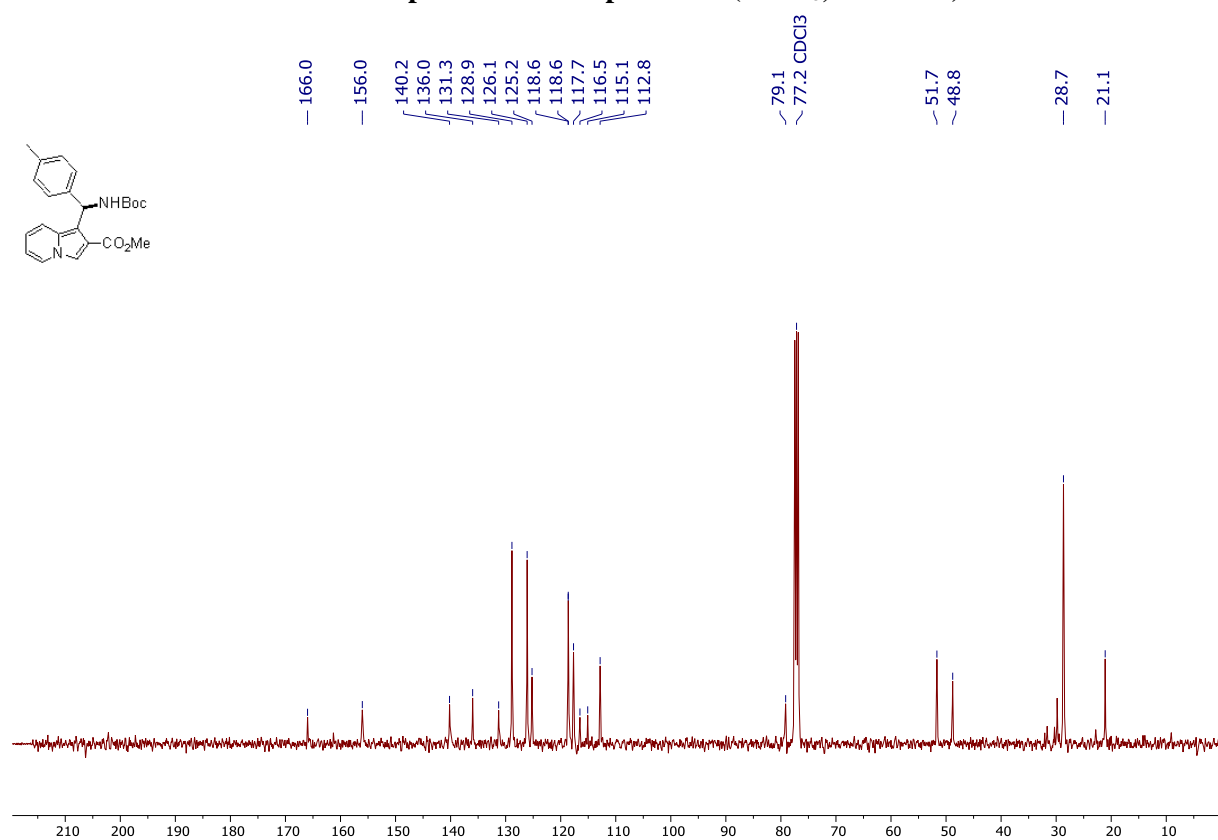

**<sup>1</sup>H NMR spectrum of compound 4c (CDCl<sub>3</sub>, 500 MHz)**

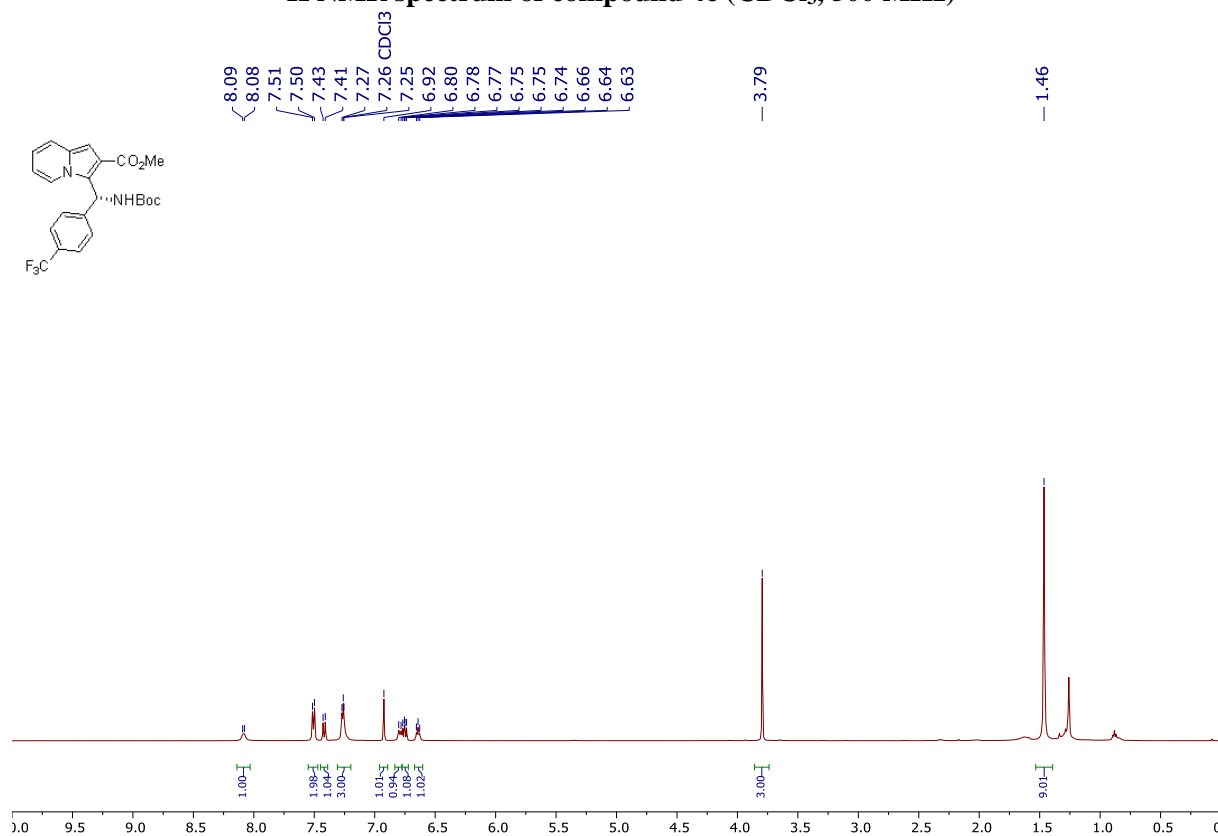

**<sup>13</sup>C NMR spectrum of compound 4c (CDCl<sub>3</sub>, 126 MHz)**

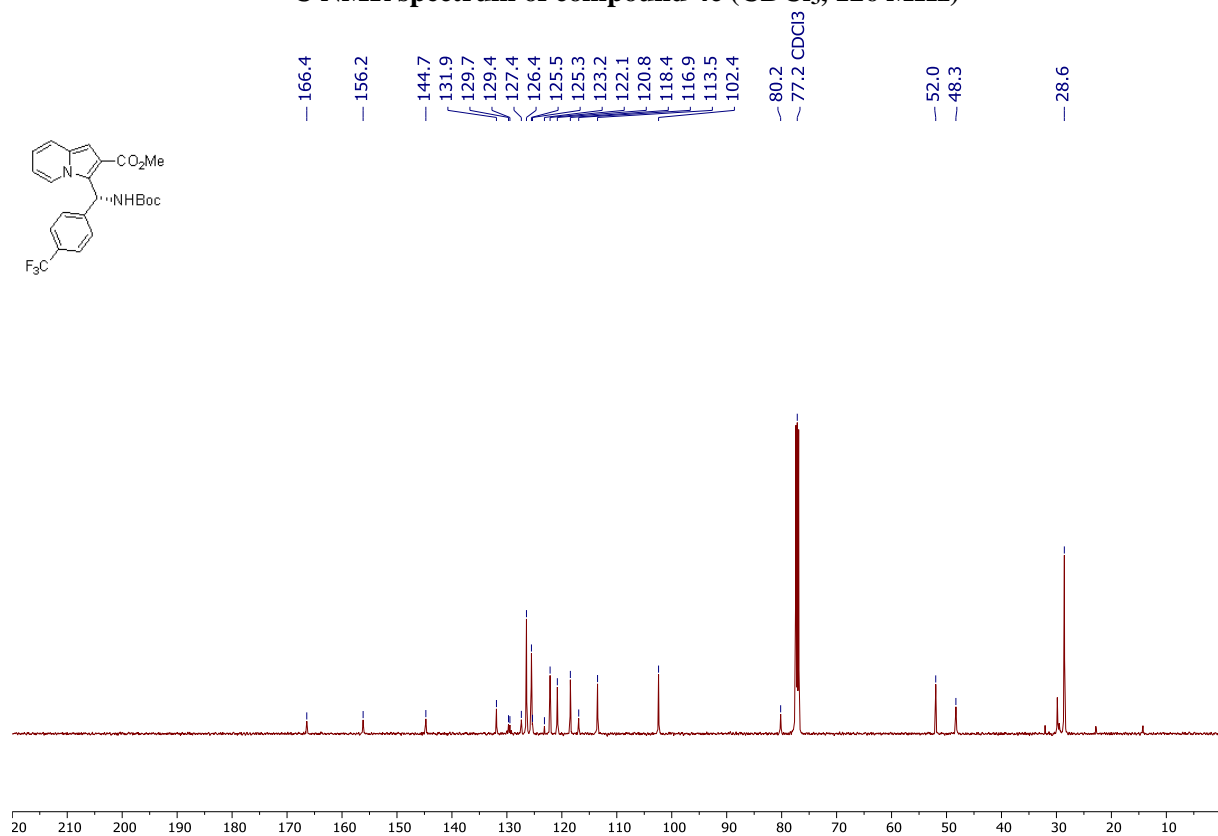

**$^{19}\text{F}$  NMR spectrum of compound 4c ( $\text{CDCl}_3$ , 470 MHz)**

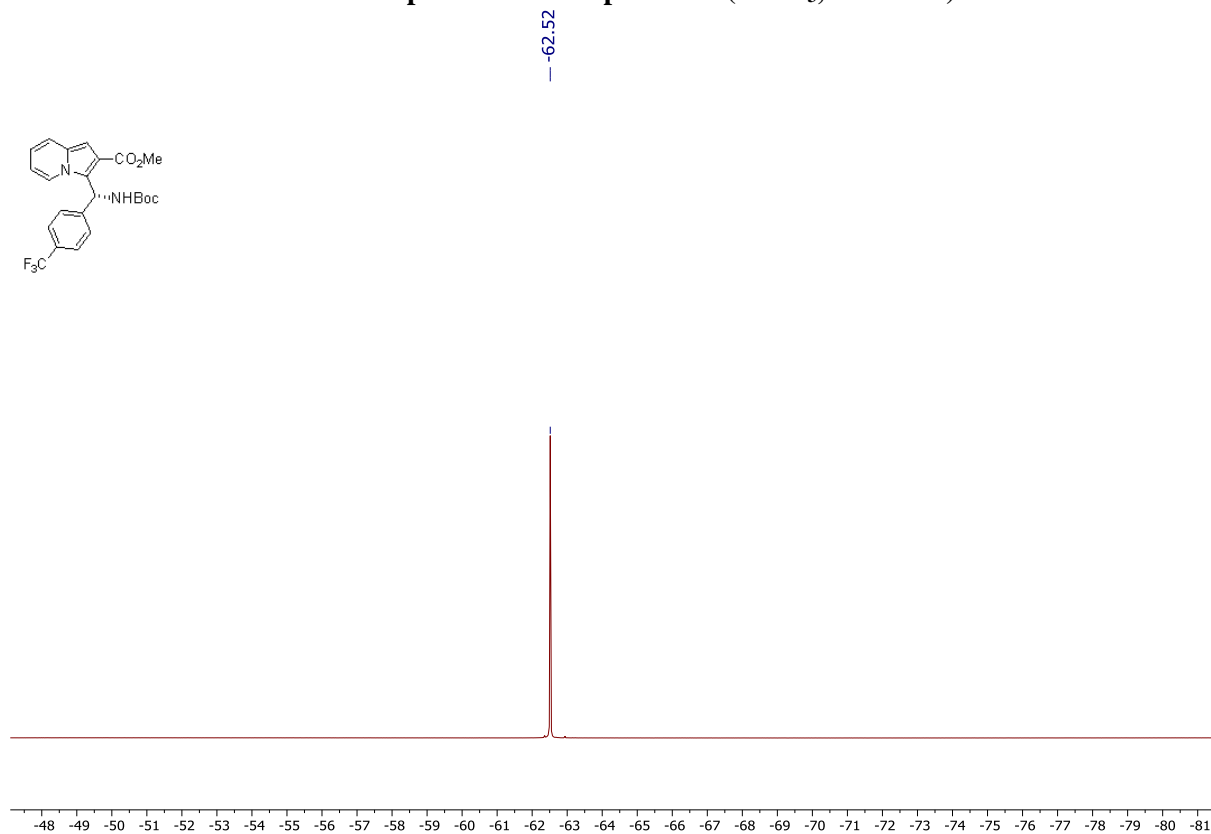



**<sup>1</sup>H NMR spectrum of compound 3c (CDCl<sub>3</sub>, 500 MHz)**

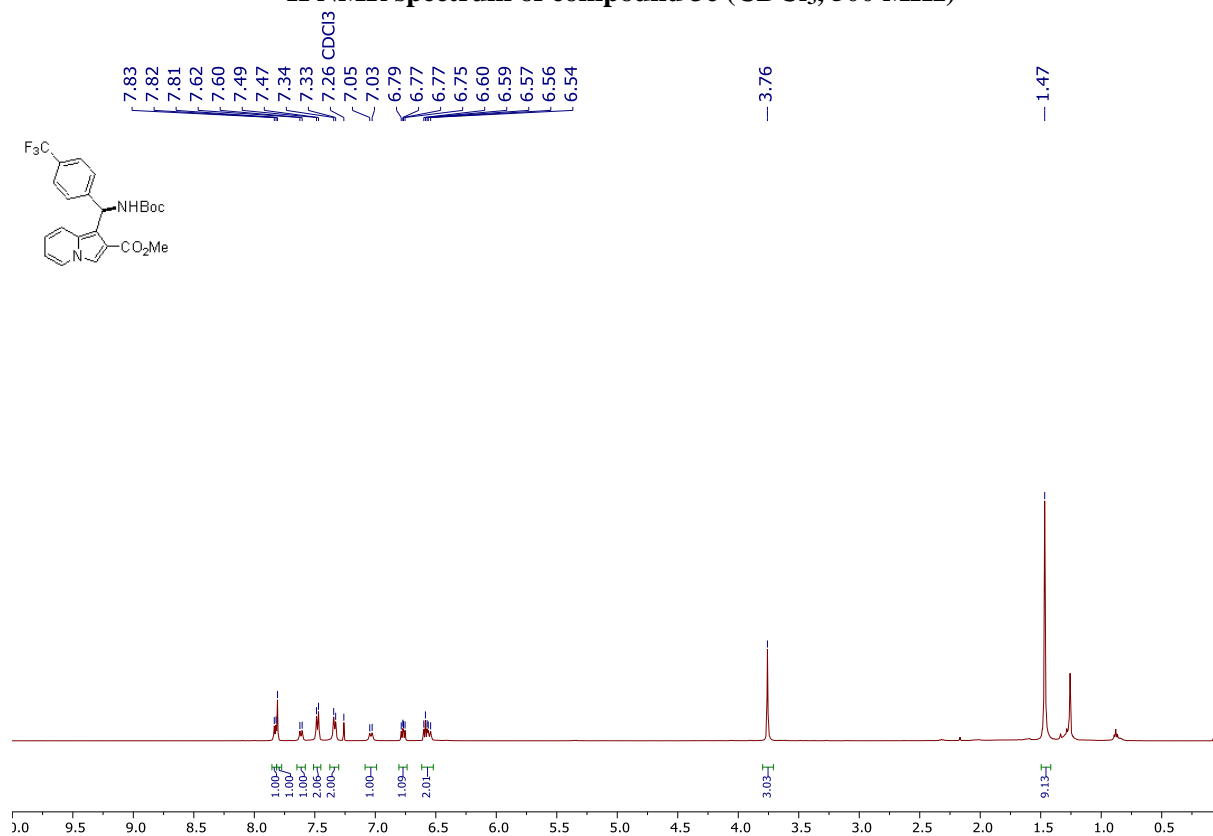

**<sup>13</sup>C NMR spectrum of compound 3c (CDCl<sub>3</sub>, 126 MHz)**

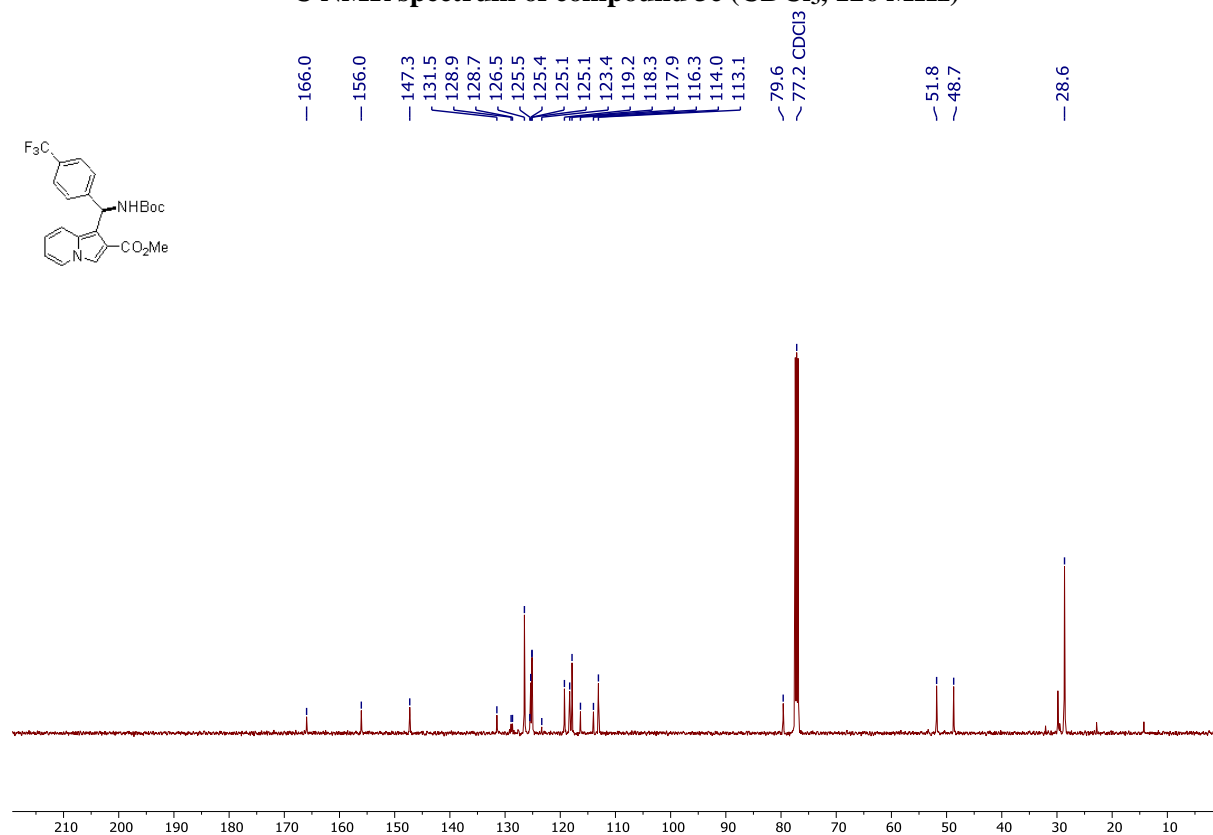

**$^{19}\text{F}$  NMR spectrum of compound 3c ( $\text{CDCl}_3$ , 470 MHz)**

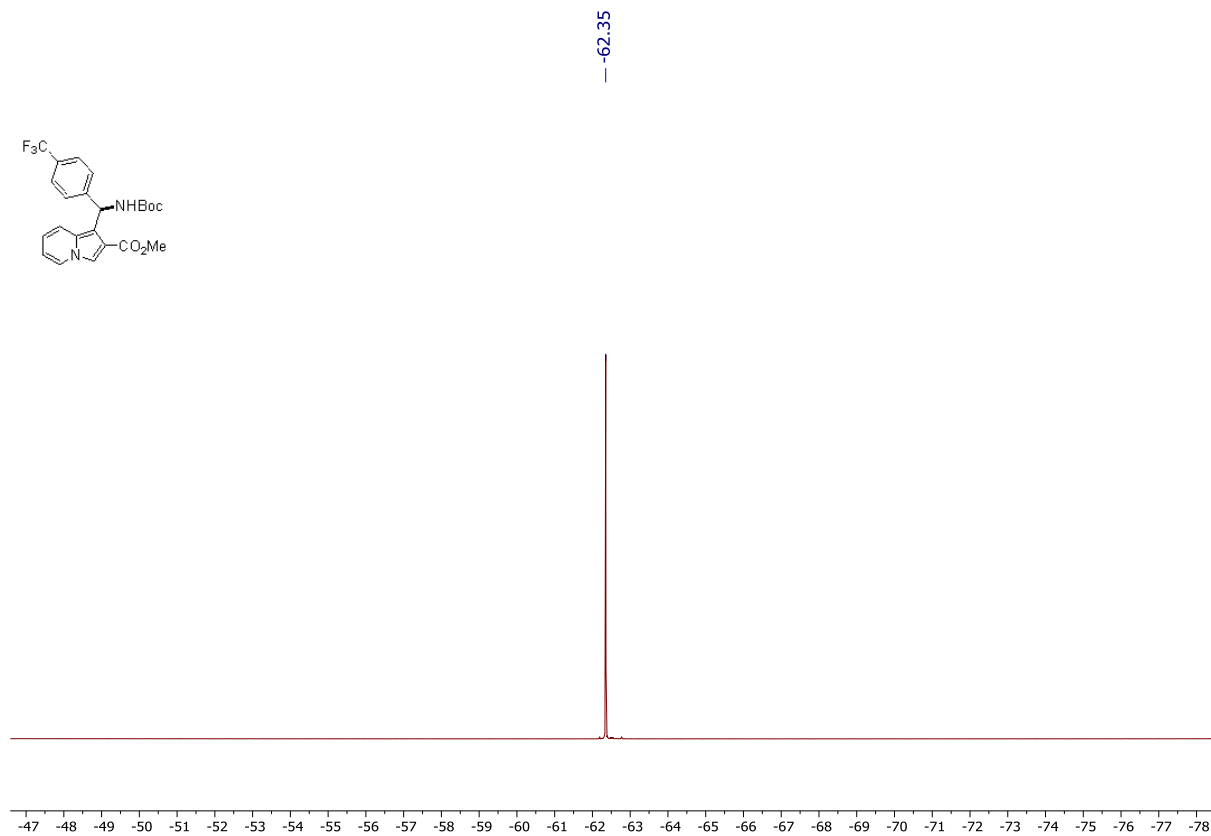

**<sup>1</sup>H NMR spectrum of compound 4d (CDCl<sub>3</sub>, 500 MHz)**

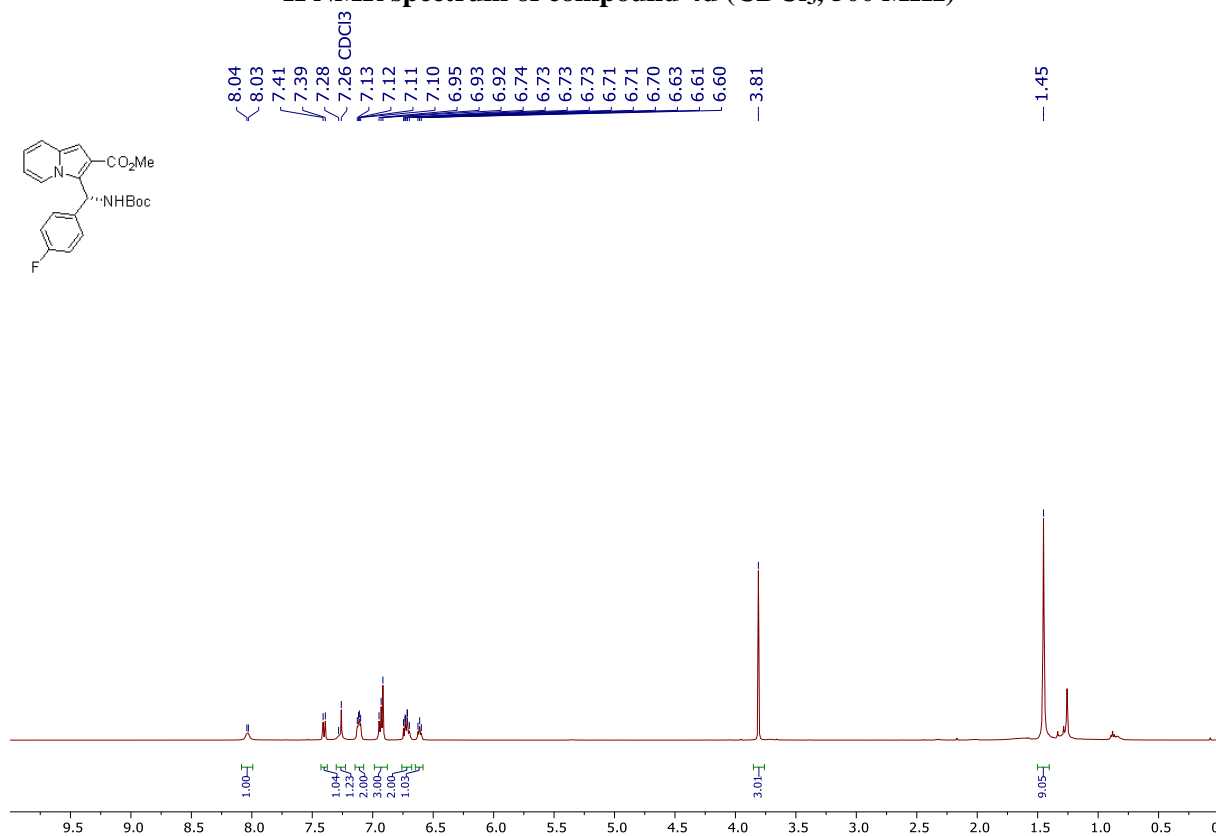

**<sup>13</sup>C NMR spectrum of compound 4d (CDCl<sub>3</sub>, 126 MHz)**

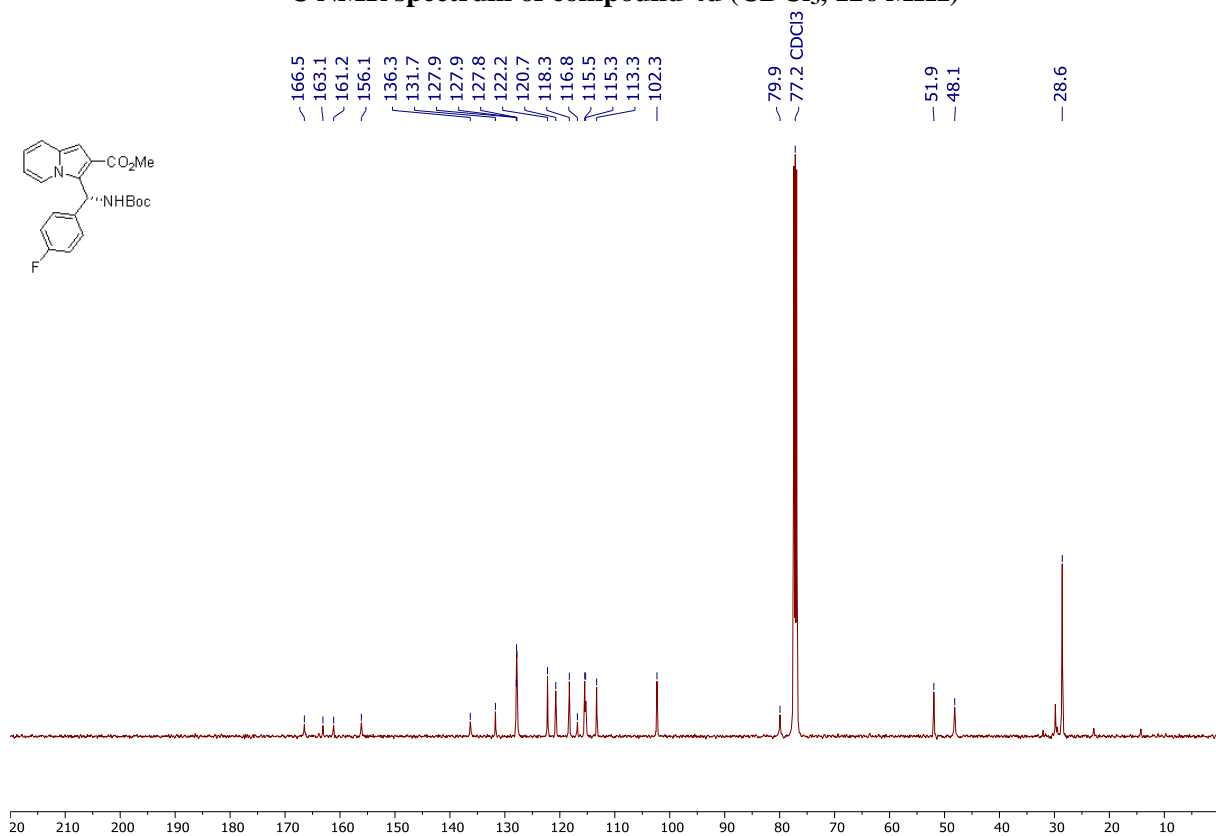

**$^{19}\text{F}$  NMR spectrum of compound 4d ( $\text{CDCl}_3$ , 470 MHz)**

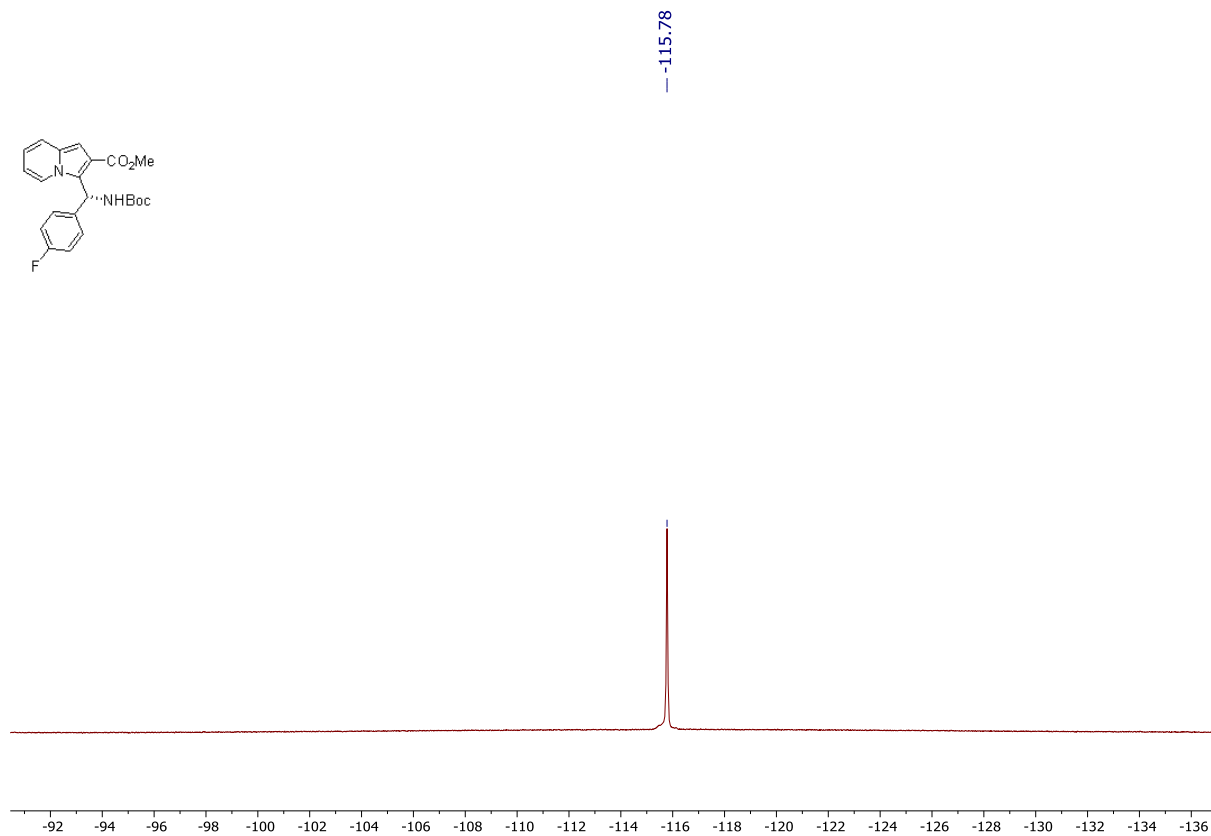

**<sup>1</sup>H NMR spectrum of compound 3d (CDCl<sub>3</sub>, 500 MHz)**

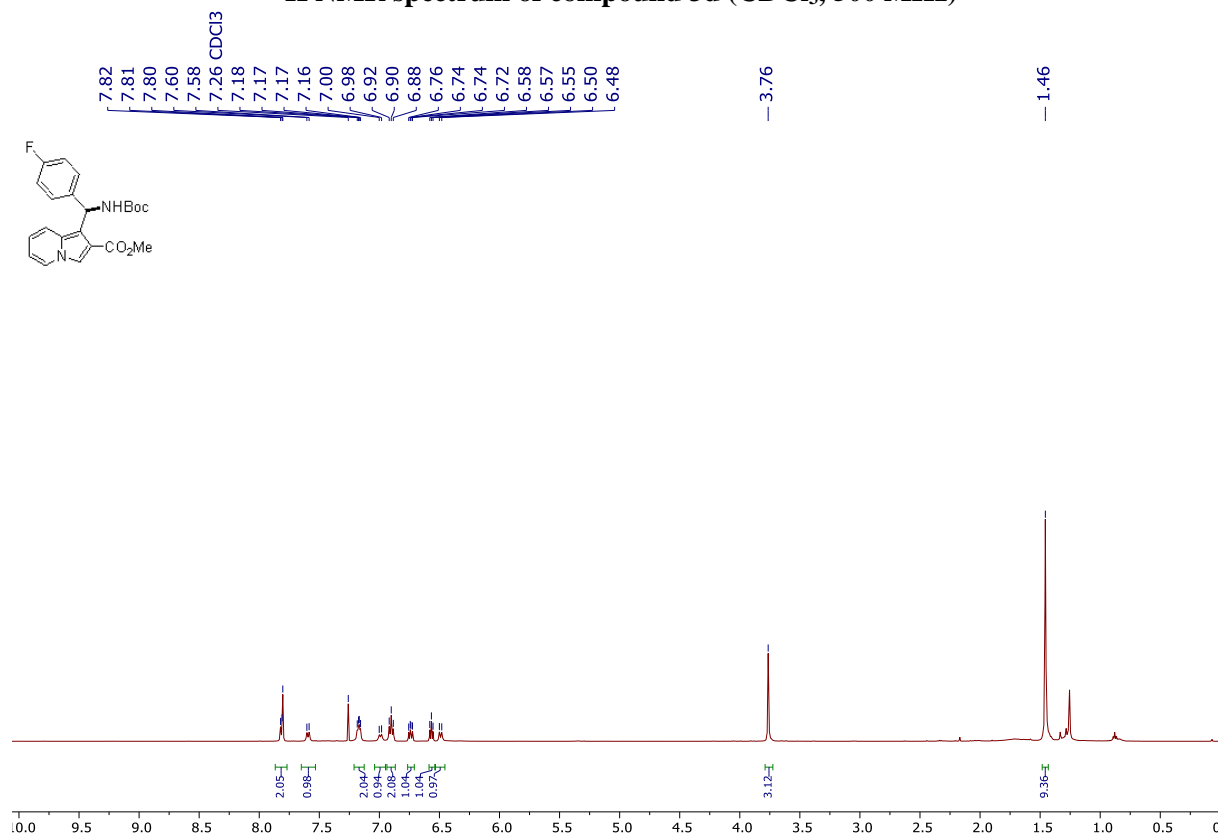

**<sup>13</sup>C NMR spectrum of compound 3d (CDCl<sub>3</sub>, 126 MHz)**

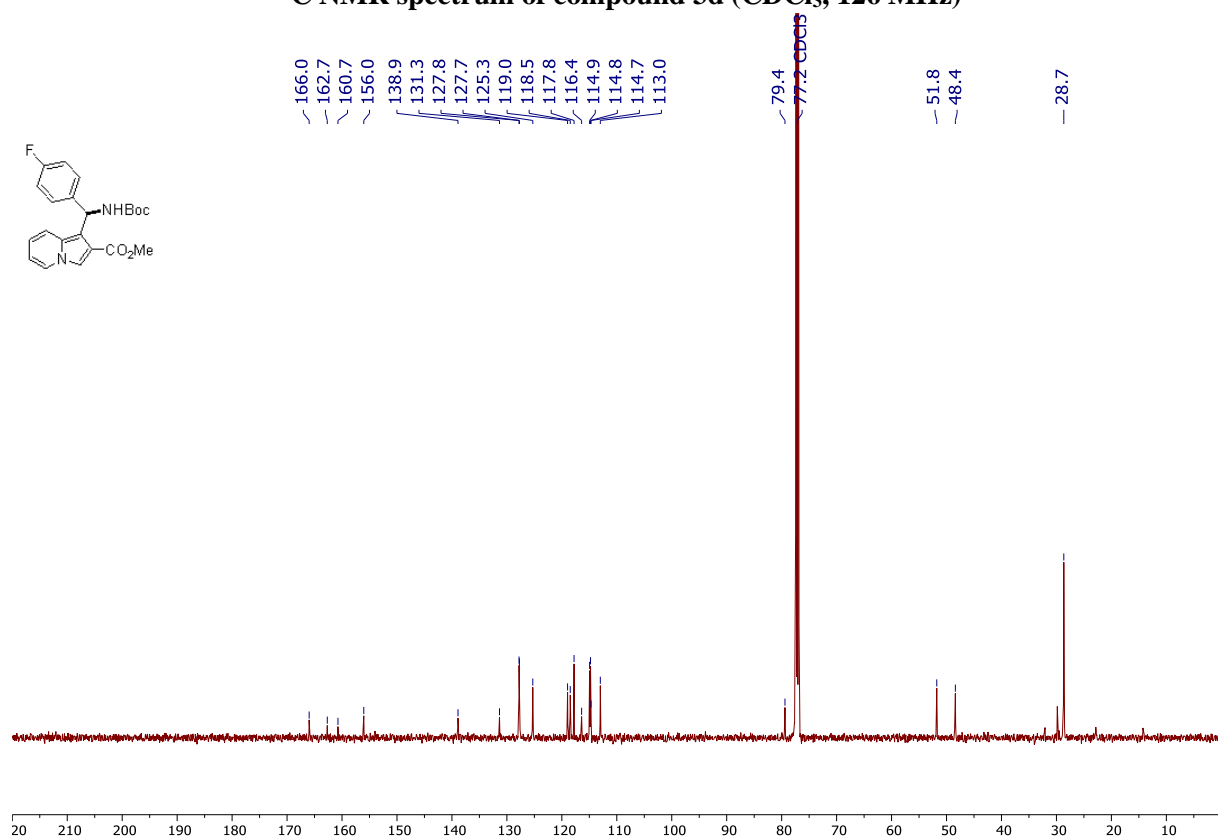

$^{19}\text{F}$  NMR spectrum of compound **3d** ( $\text{CDCl}_3$ , 470 MHz)

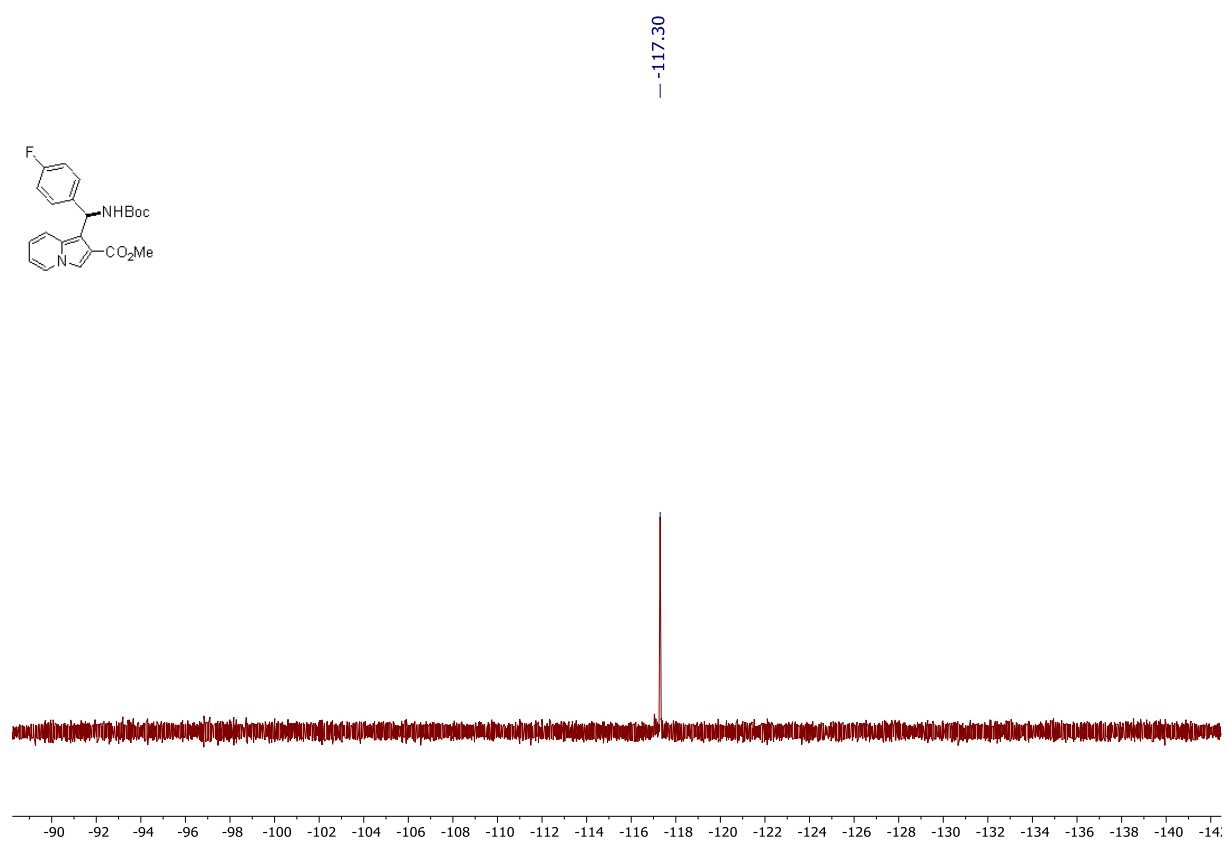

**<sup>1</sup>H NMR spectrum of compound 4e (CDCl<sub>3</sub>, 200 MHz)**

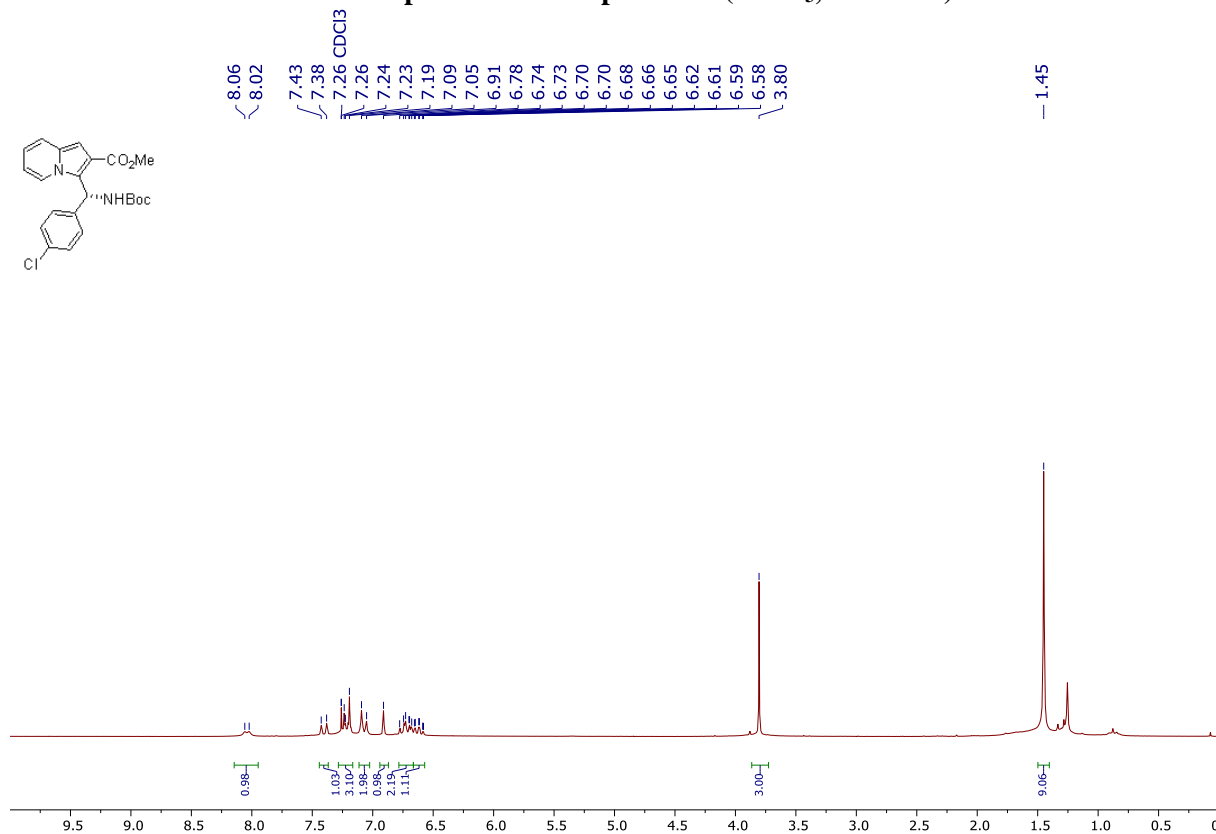

**<sup>13</sup>C NMR spectrum of compound 4e (CDCl<sub>3</sub>, 126 MHz)**

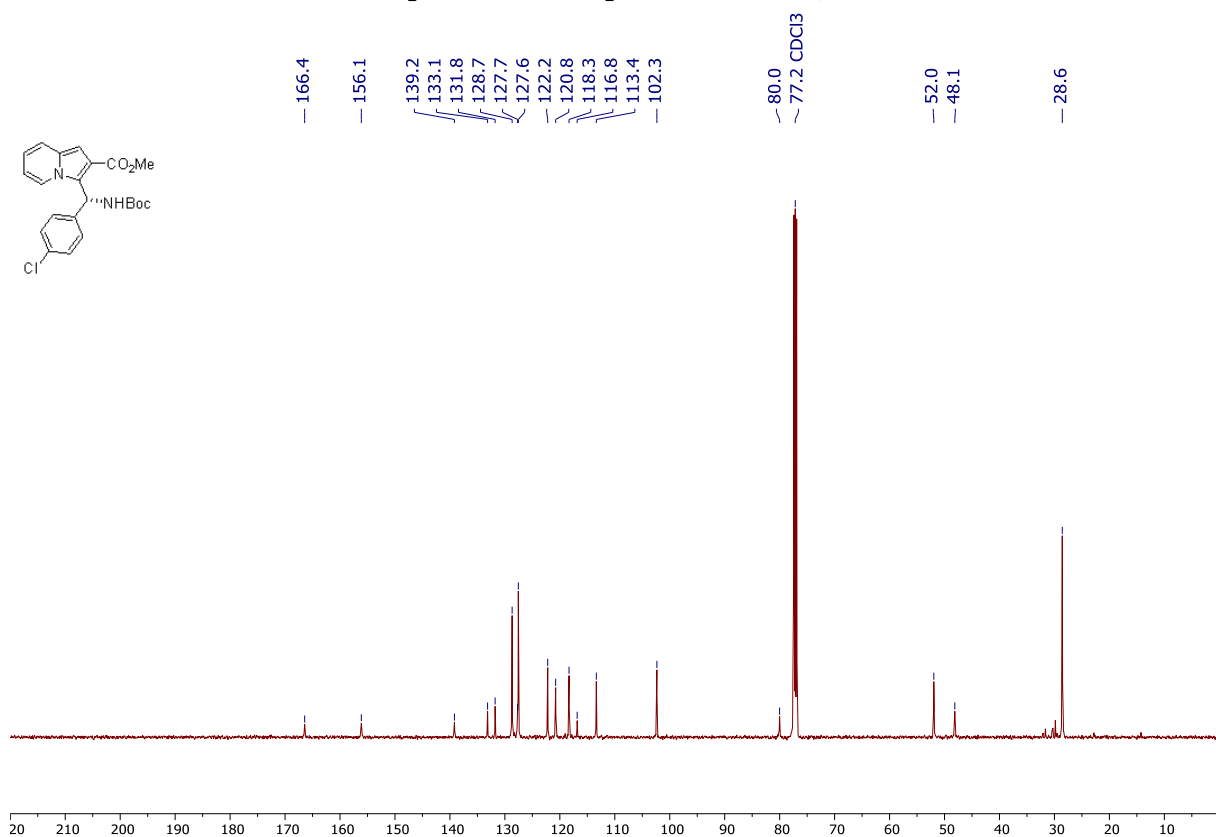

**<sup>1</sup>H NMR spectrum of compound 3e (CDCl<sub>3</sub>, 500 MHz)**

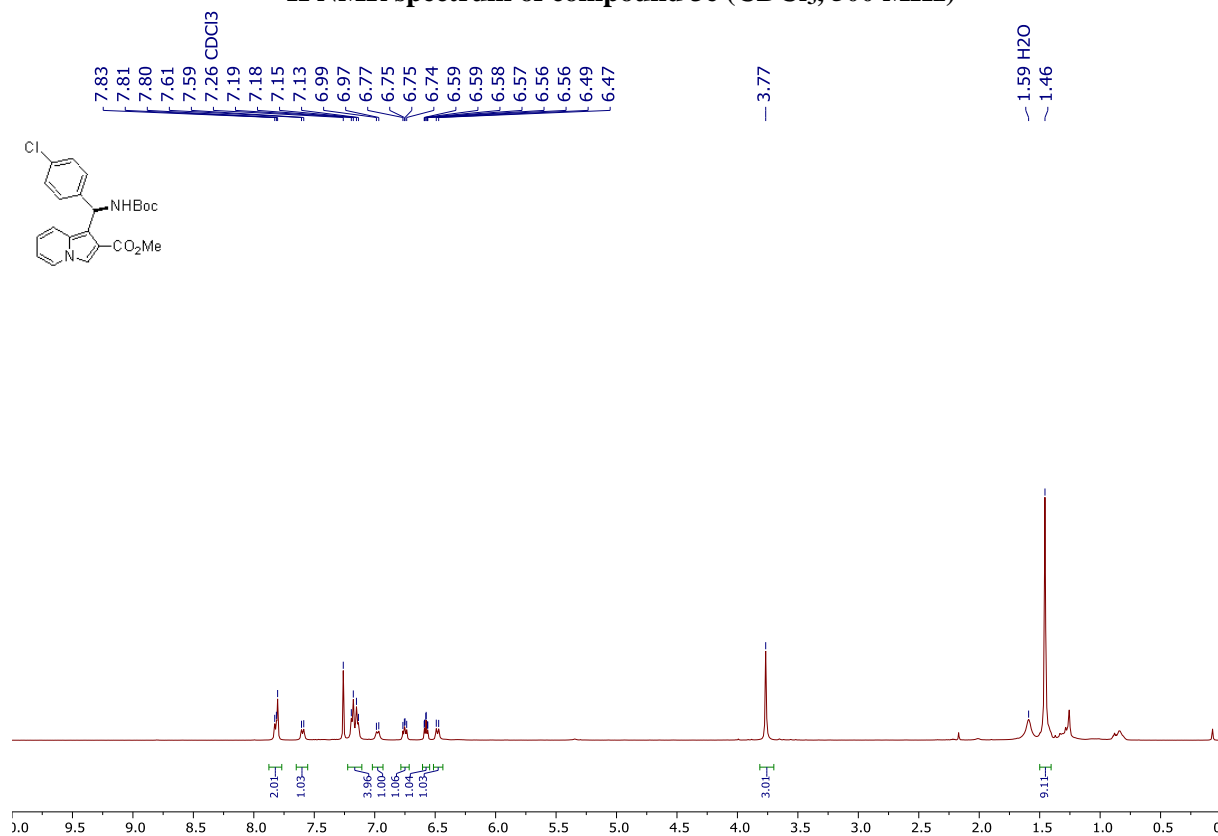

**<sup>13</sup>C NMR spectrum of compound 3e (CDCl<sub>3</sub>, 126 MHz)**

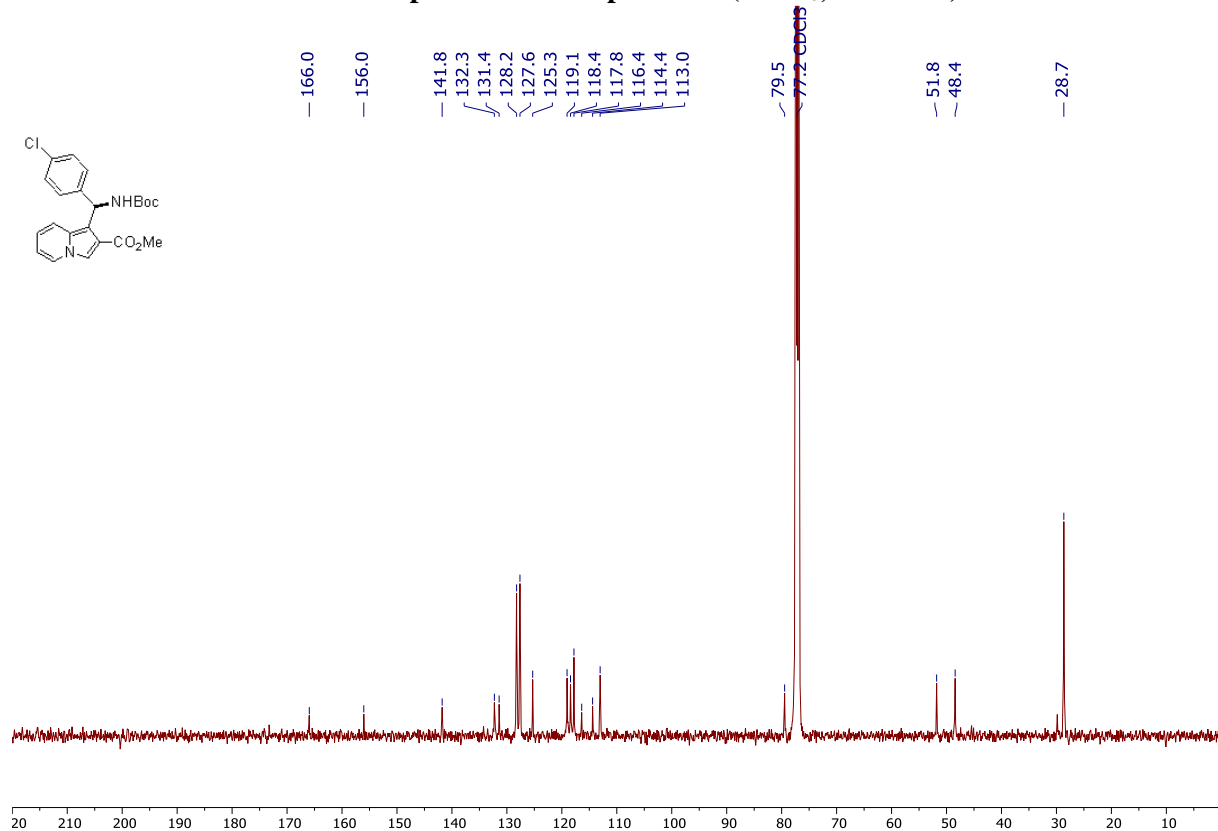



**<sup>1</sup>H NMR spectrum of compound 4f (CDCl<sub>3</sub>, 500 MHz)**

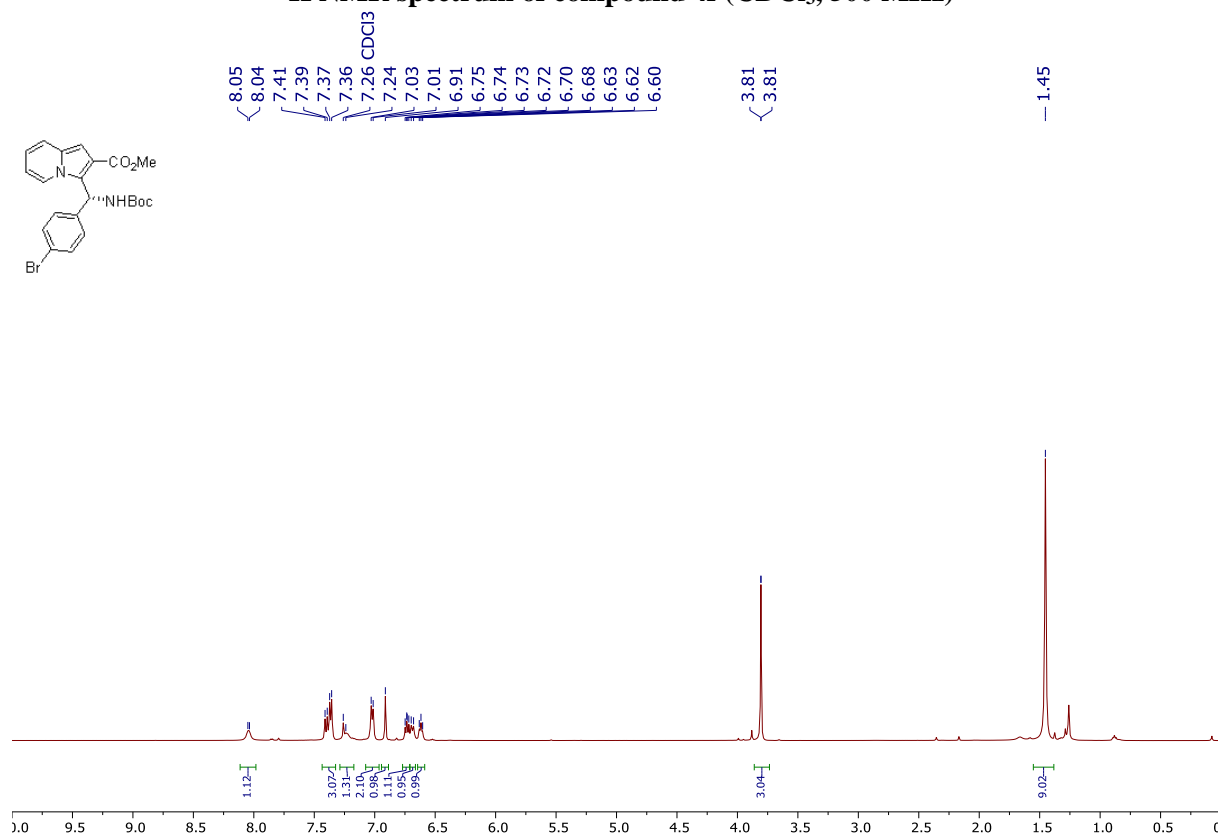

**<sup>13</sup>C NMR spectrum of compound 4f (CDCl<sub>3</sub>, 126 MHz)**

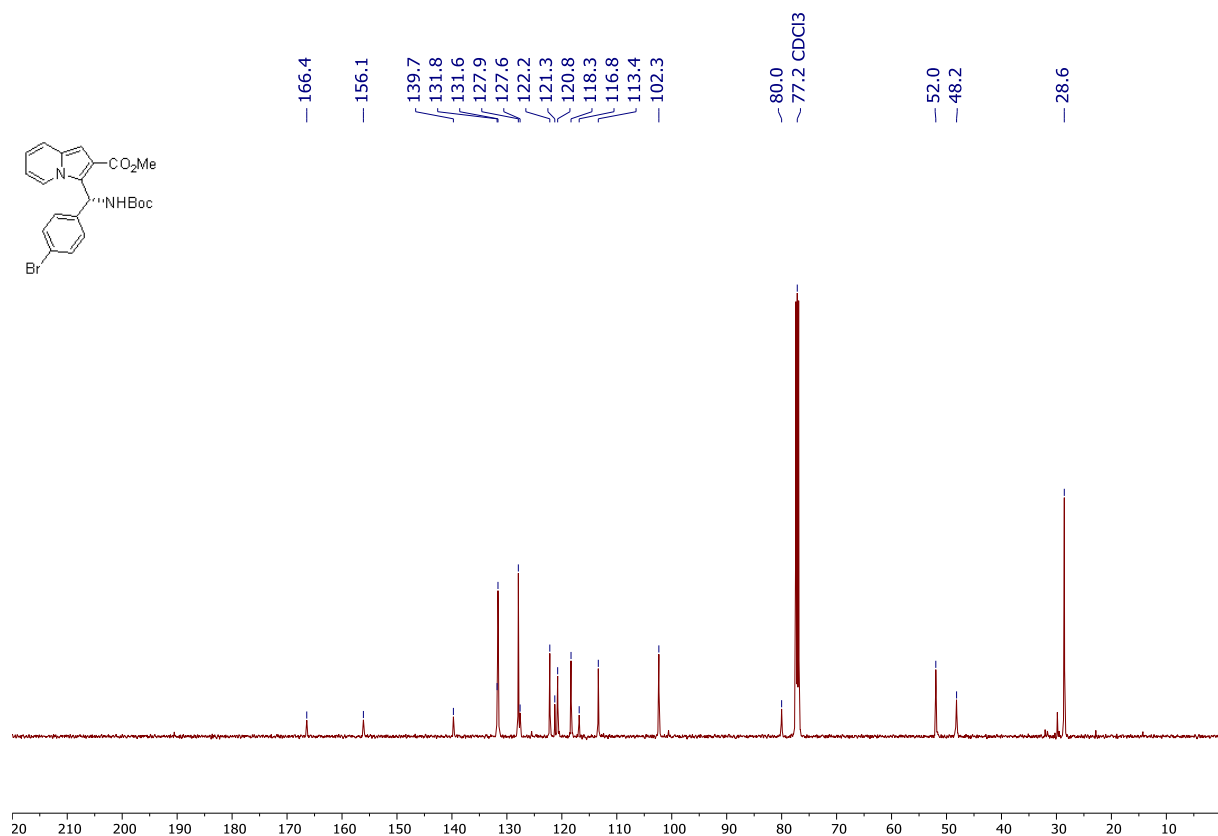

**<sup>1</sup>H NMR spectrum of compound 3f (CDCl<sub>3</sub>, 500 MHz)**

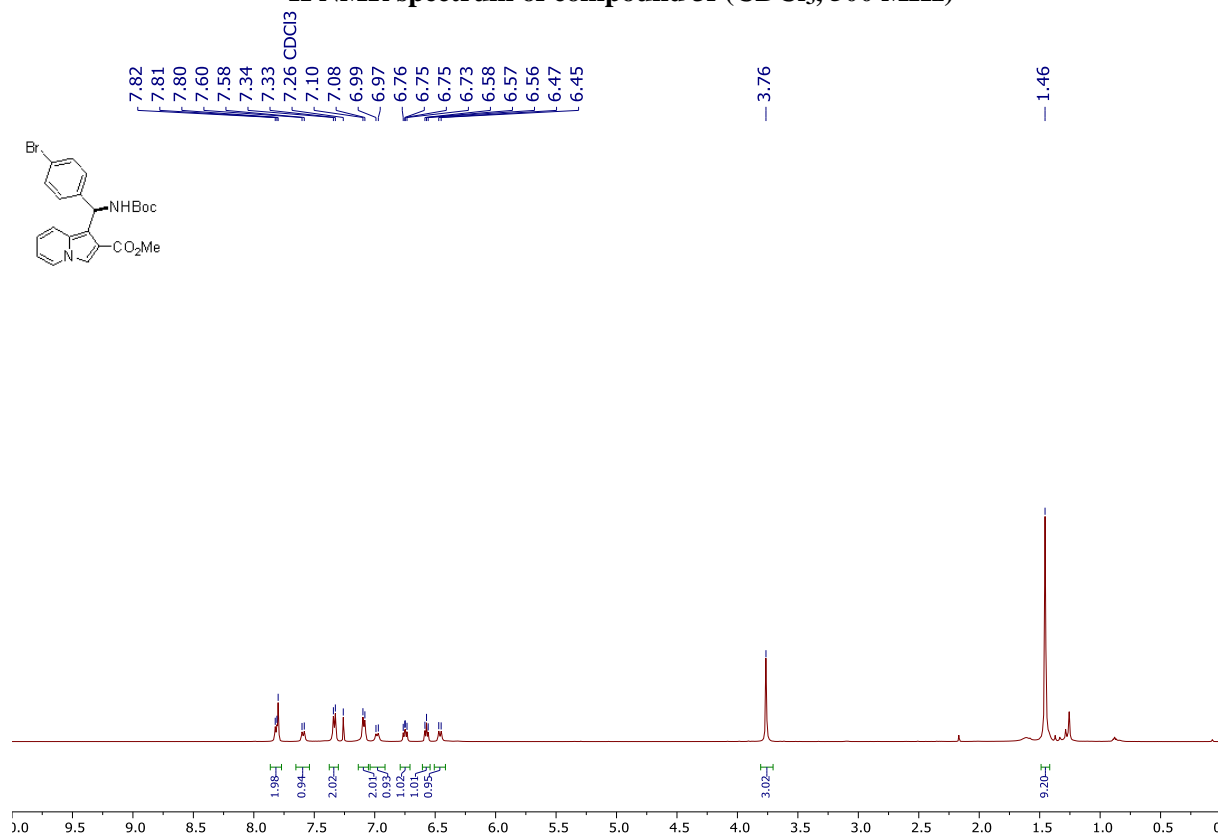

**<sup>13</sup>C NMR spectrum of compound 3f (CDCl<sub>3</sub>, 126 MHz)**

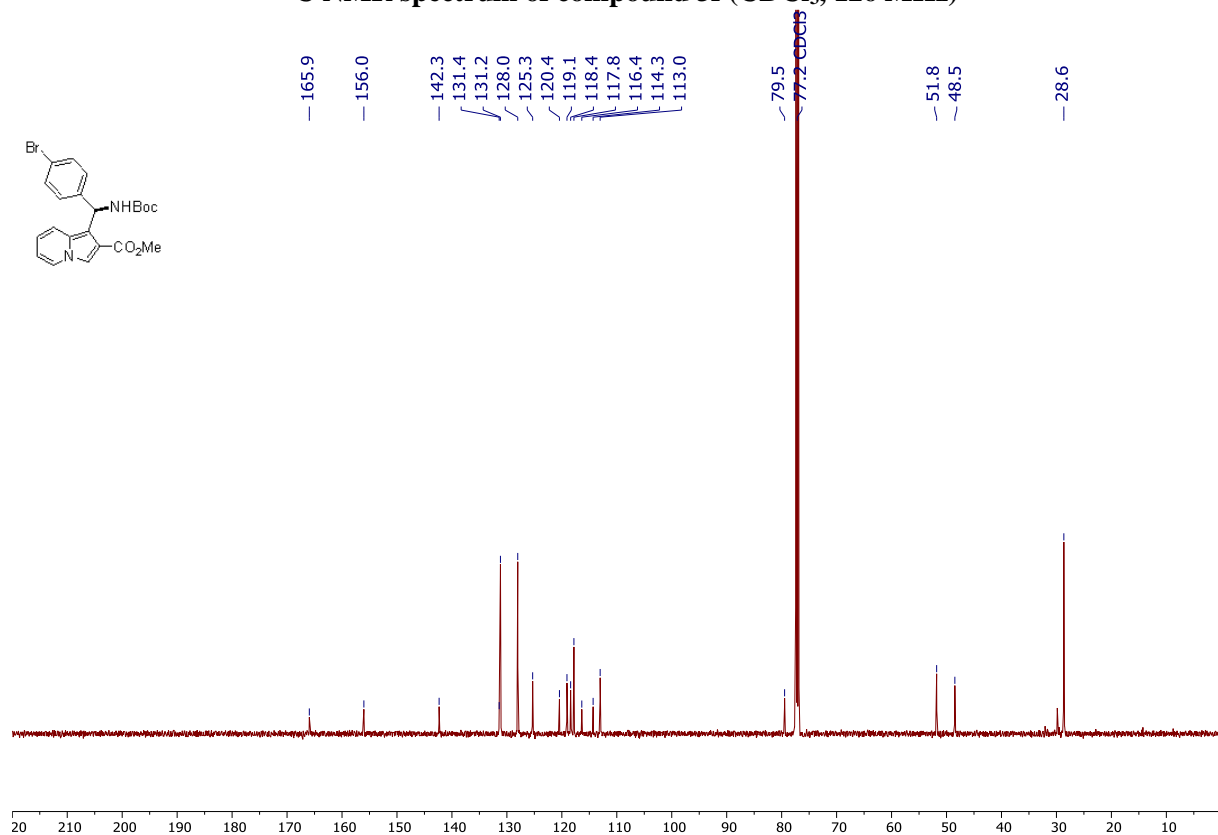

**<sup>1</sup>H NMR spectrum of compound 4g (CDCl<sub>3</sub>, 200 MHz)**

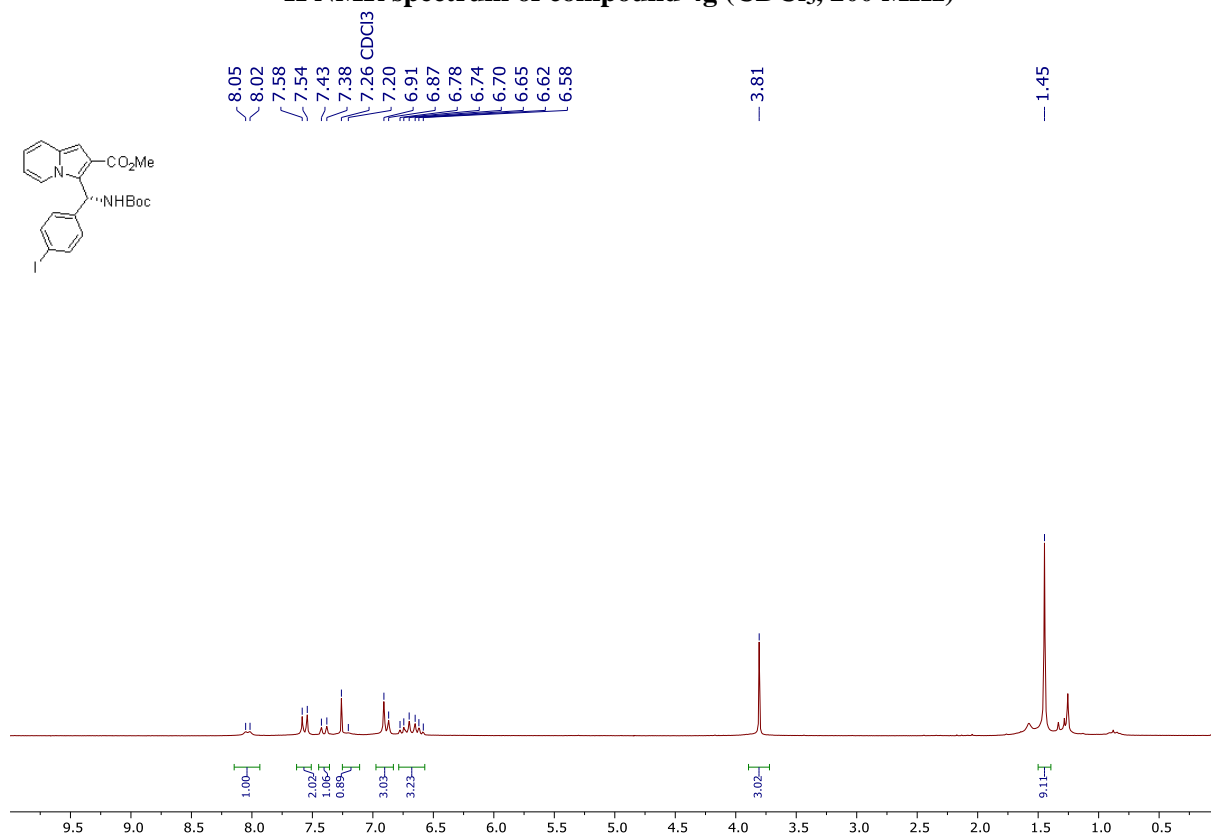

**<sup>13</sup>C NMR spectrum of compound 4g (CDCl<sub>3</sub>, 126 MHz)**

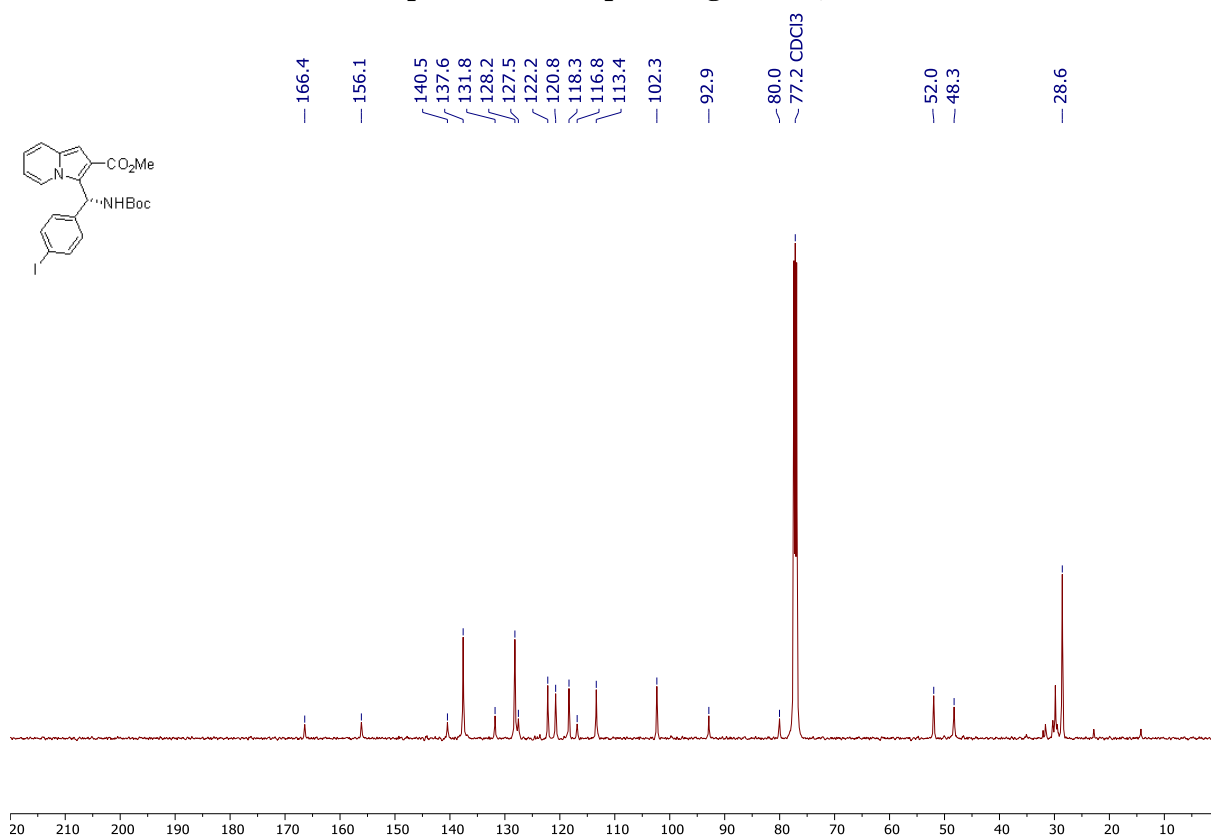

**<sup>1</sup>H NMR spectrum of compound 3g (CDCl<sub>3</sub>, 600 MHz)**

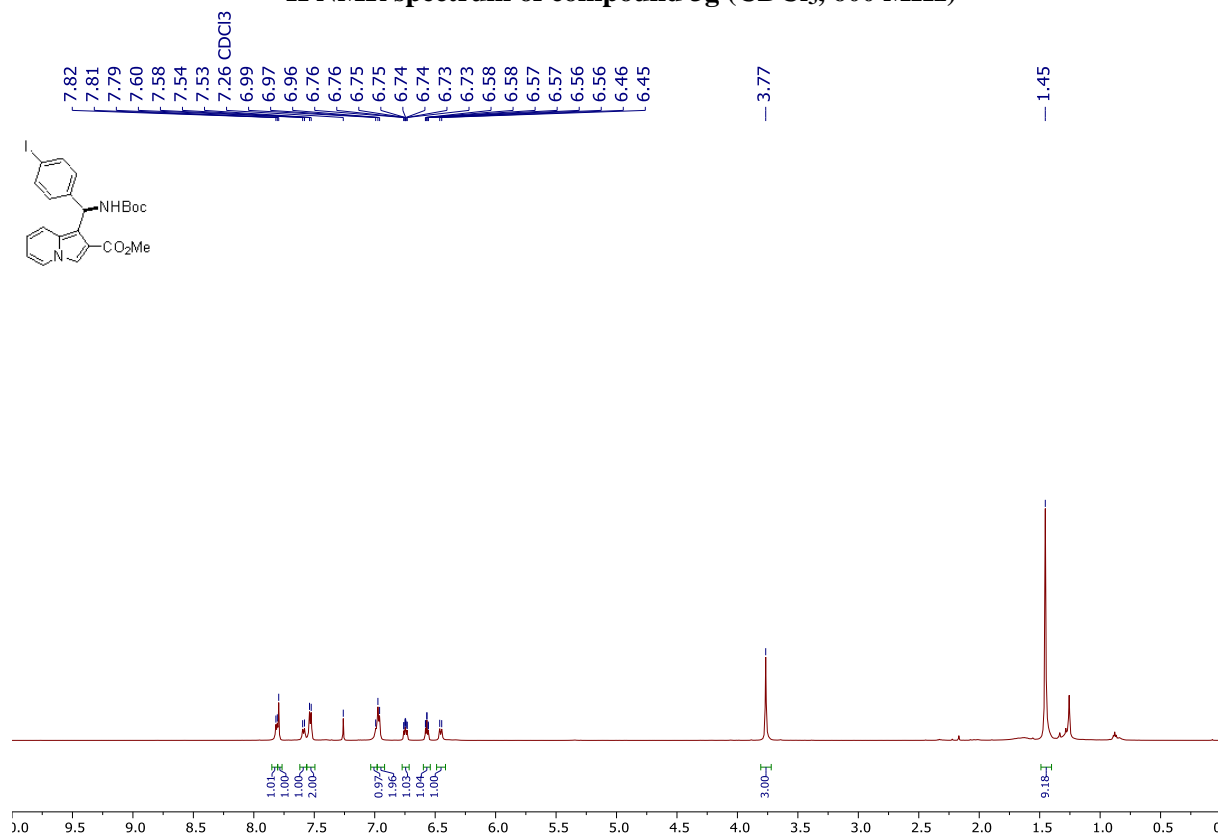

**<sup>13</sup>C NMR spectrum of compound 3g (CDCl<sub>3</sub>, 126 MHz)**

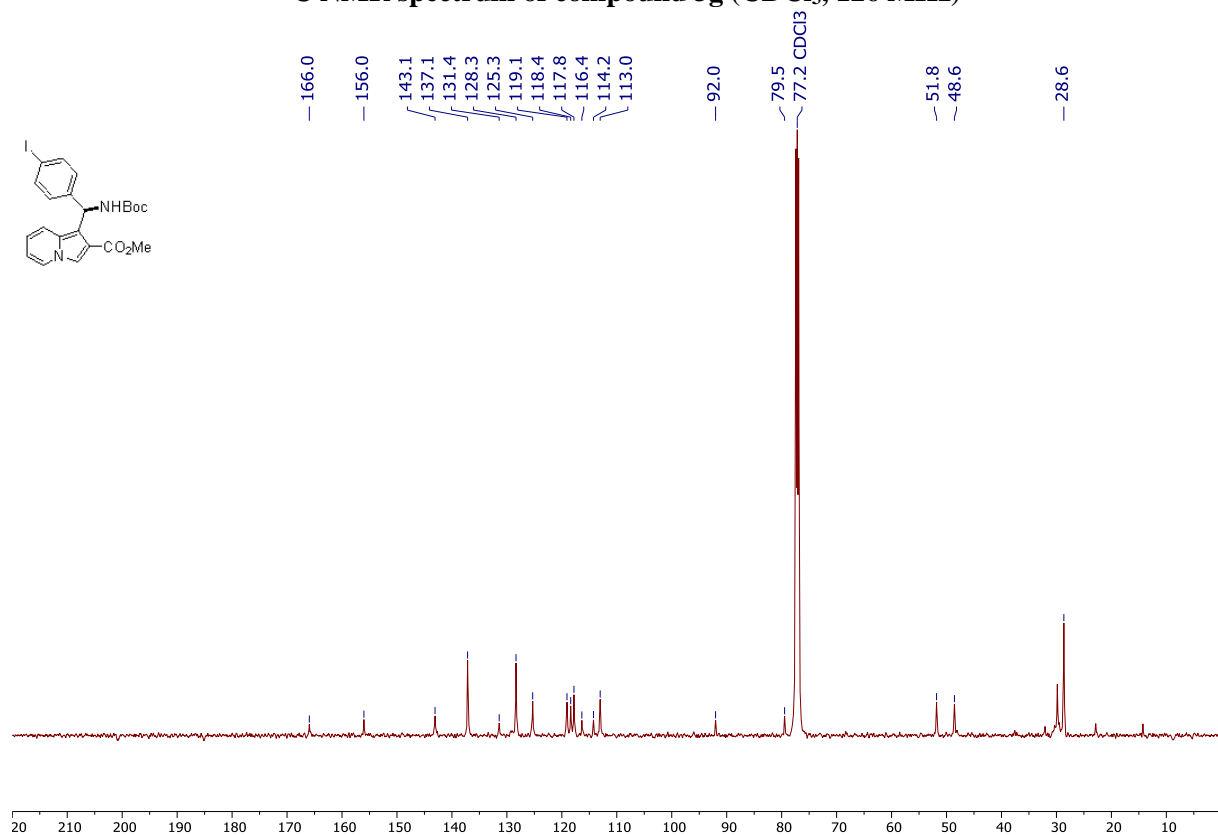

**<sup>1</sup>H NMR spectrum of compound 4h (CDCl<sub>3</sub>, 600 MHz)**

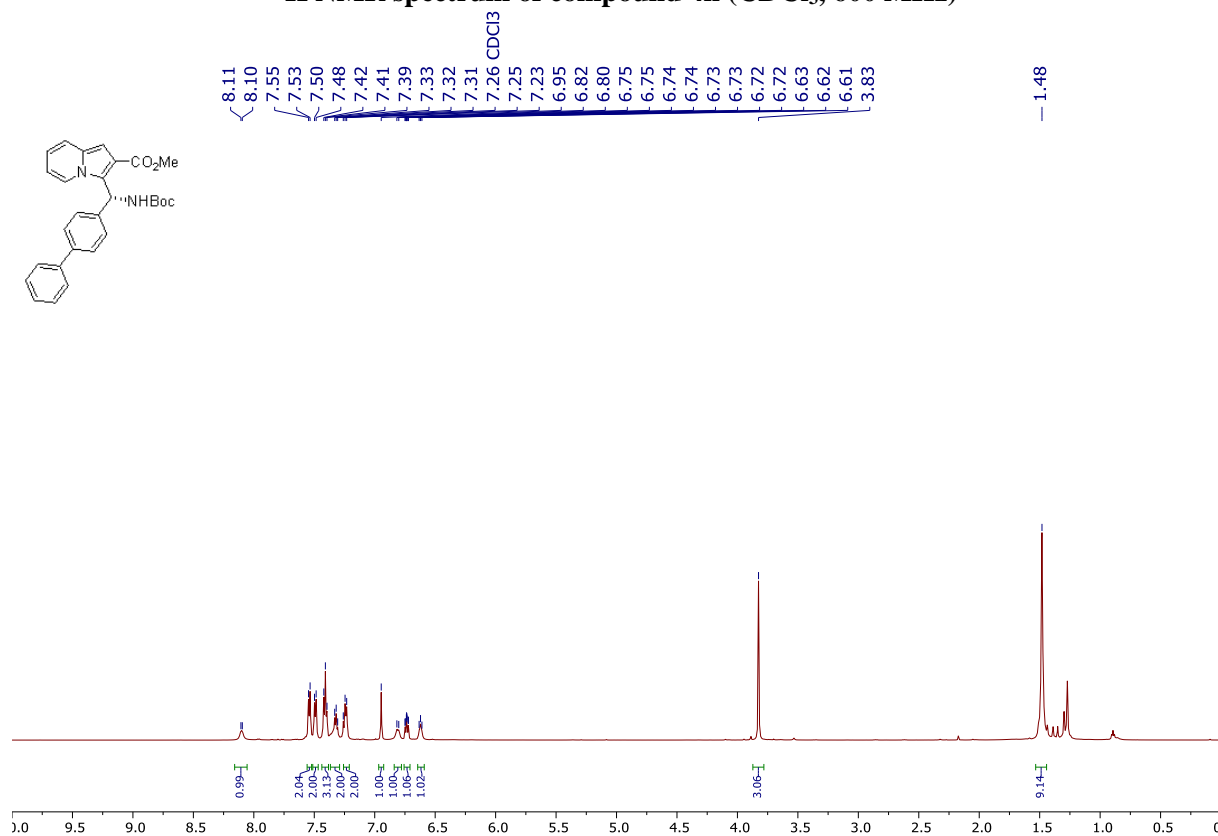

**<sup>13</sup>C NMR spectrum of compound 4h (CDCl<sub>3</sub>, 151 MHz)**

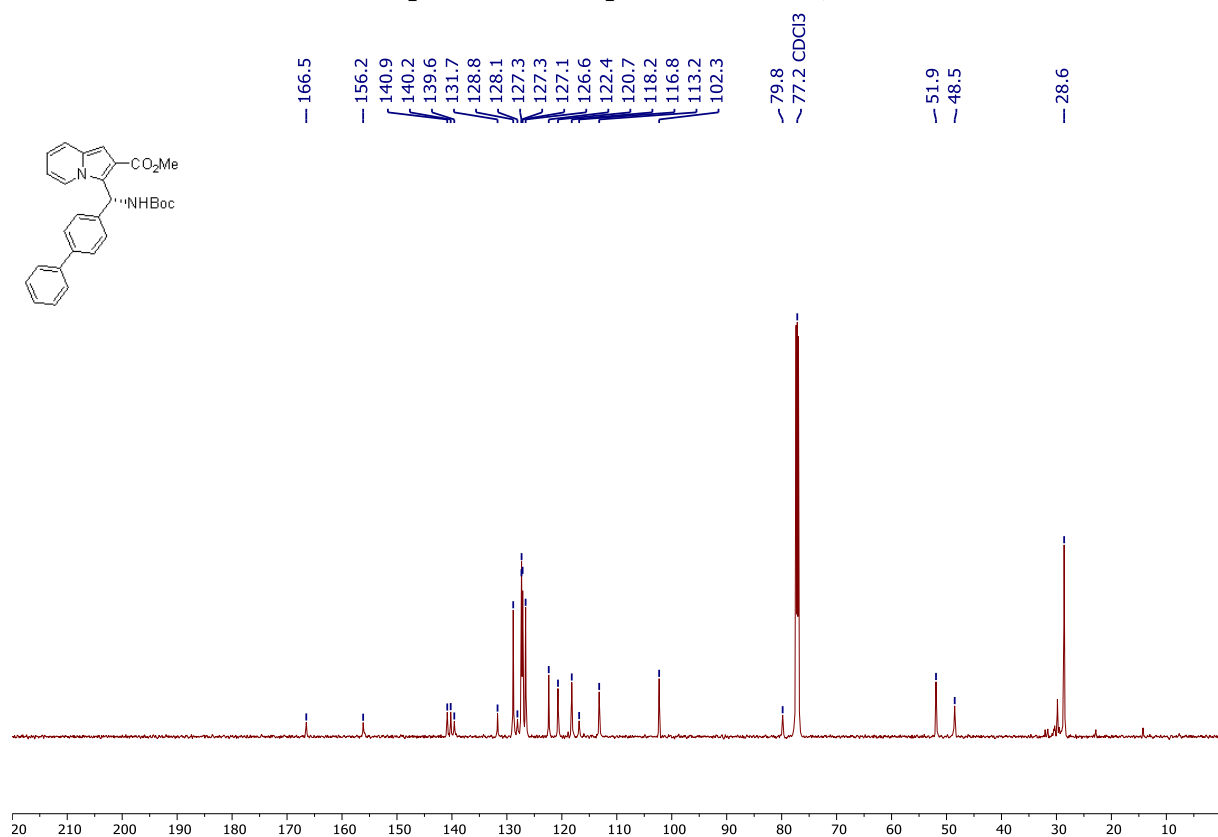

**<sup>1</sup>H NMR spectrum of compound 3h (CDCl<sub>3</sub>, 600 MHz)**

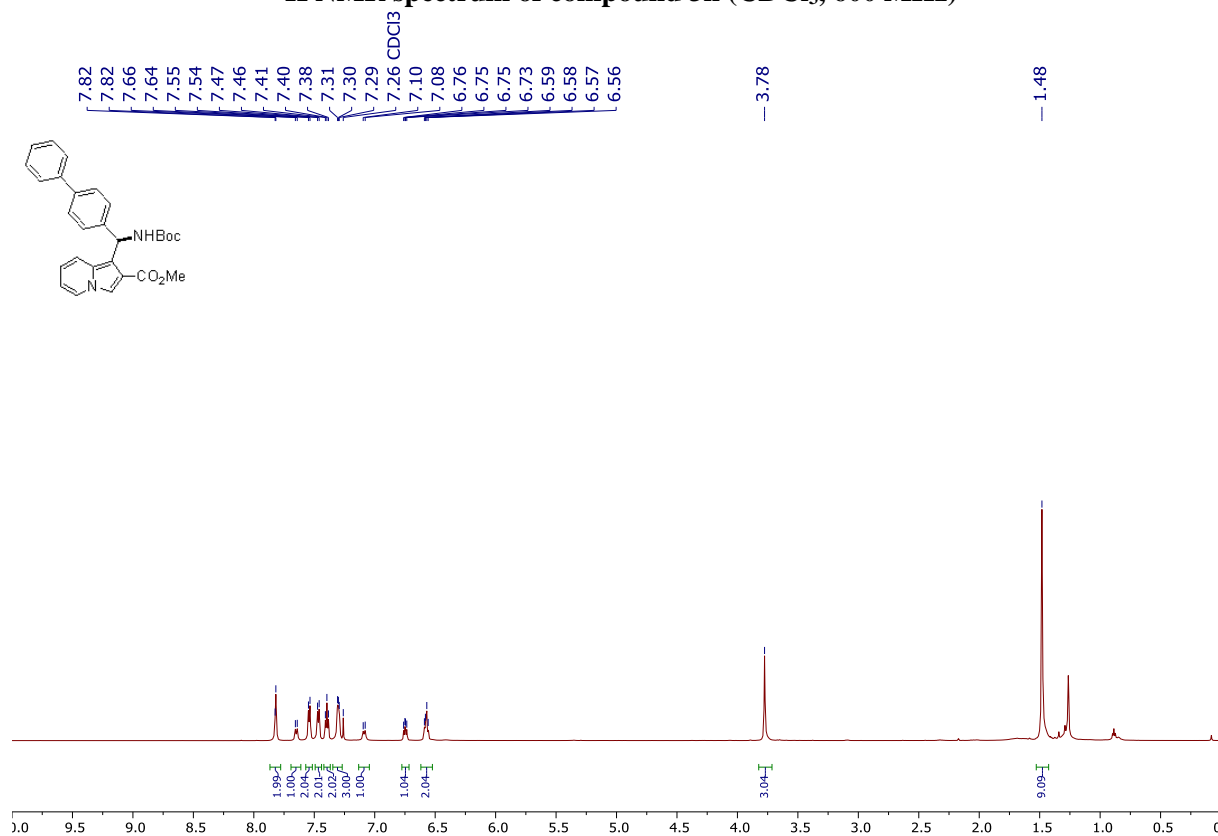

**<sup>13</sup>C NMR spectrum of compound 3h (CDCl<sub>3</sub>, 151 MHz)**

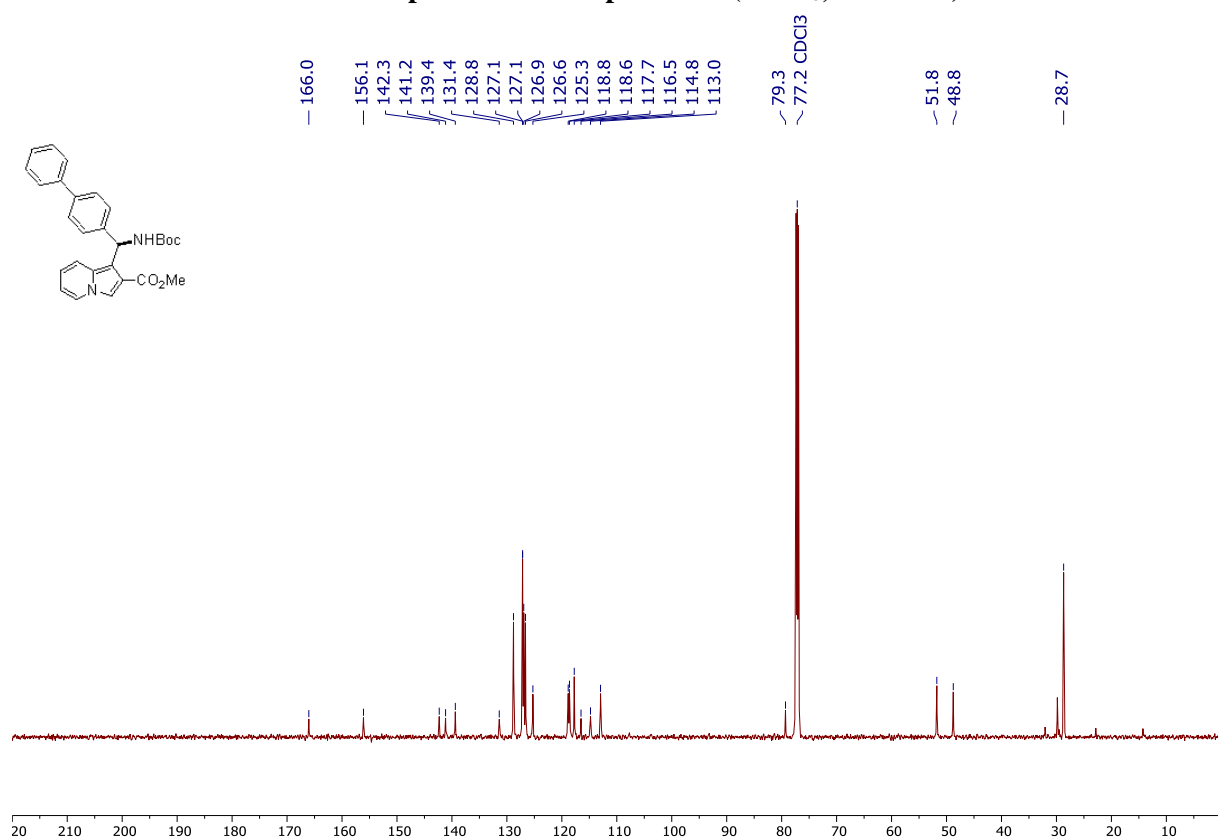

**<sup>1</sup>H NMR spectrum of compound 4i (CDCl<sub>3</sub>, 400 MHz)**

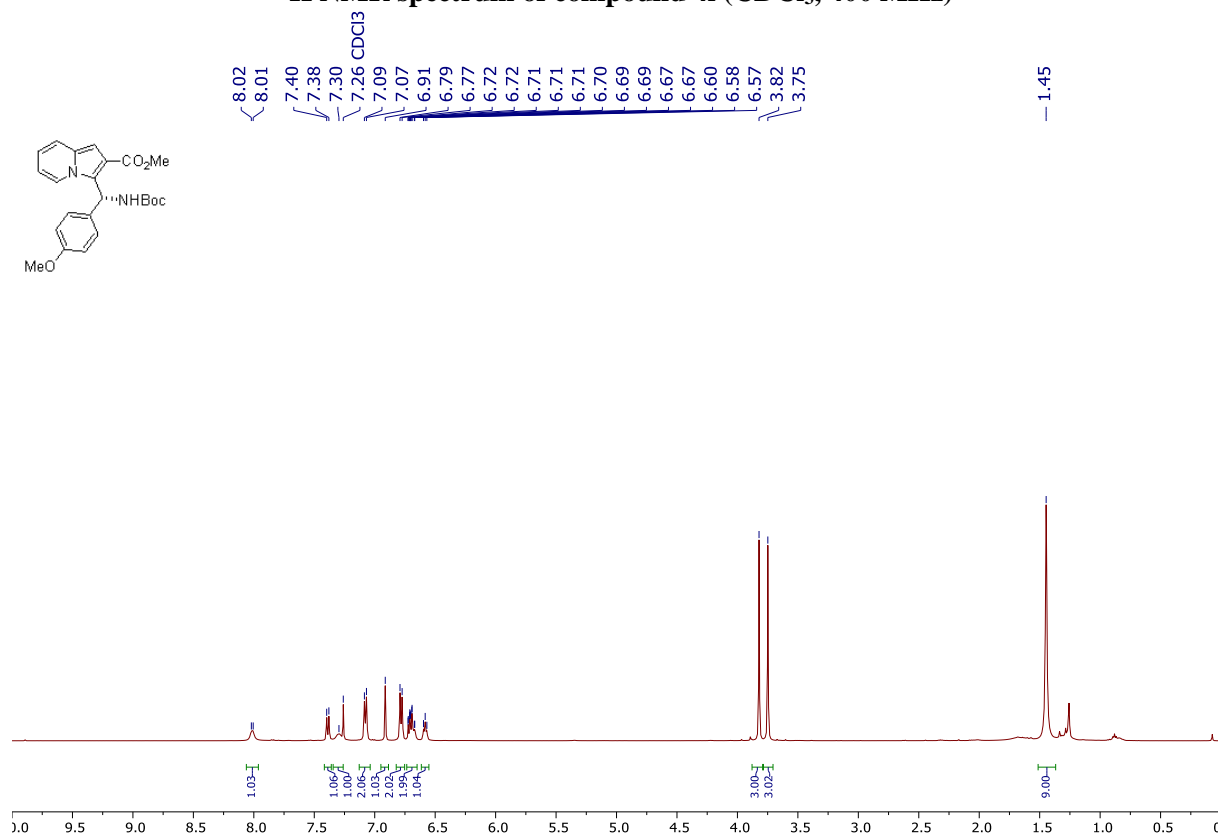

**<sup>13</sup>C NMR spectrum of compound 4i (CDCl<sub>3</sub>, 101 MHz)**

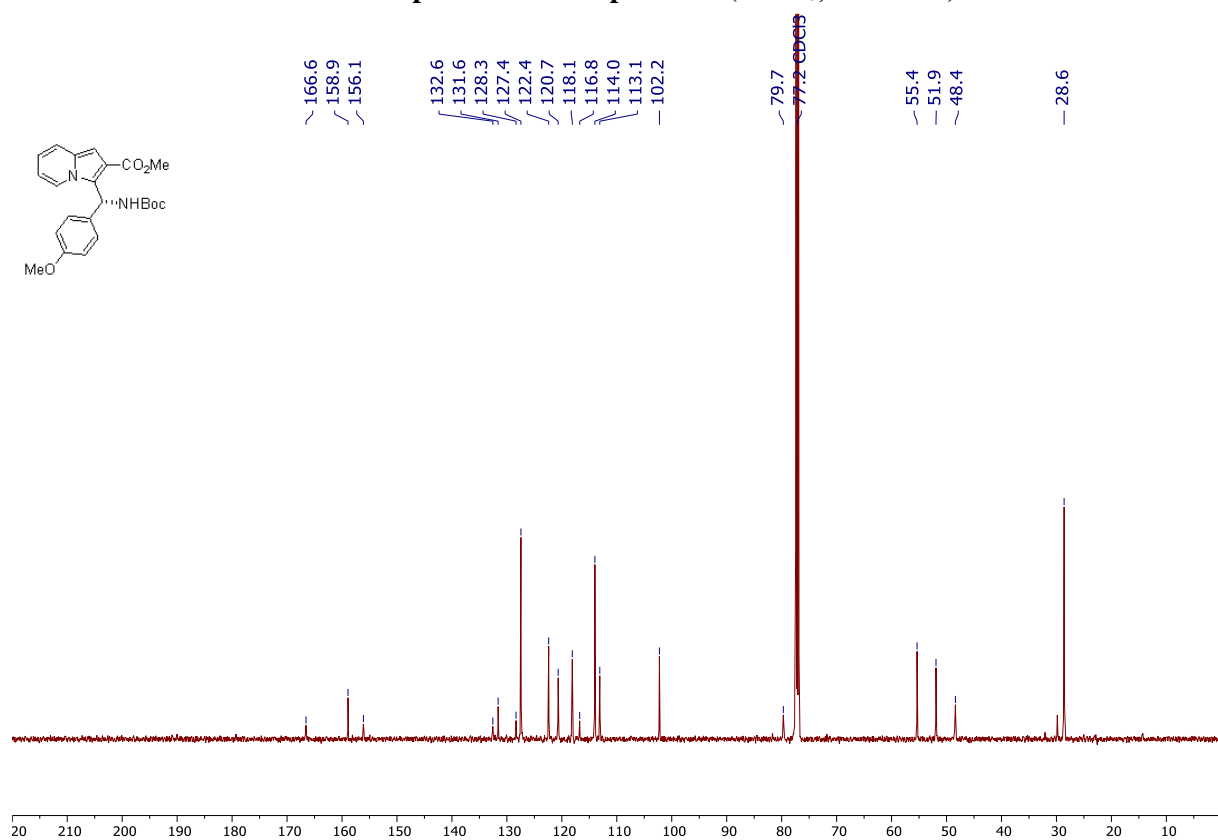

**<sup>1</sup>H NMR spectrum of compound 3i (CDCl<sub>3</sub>, 400 MHz)**

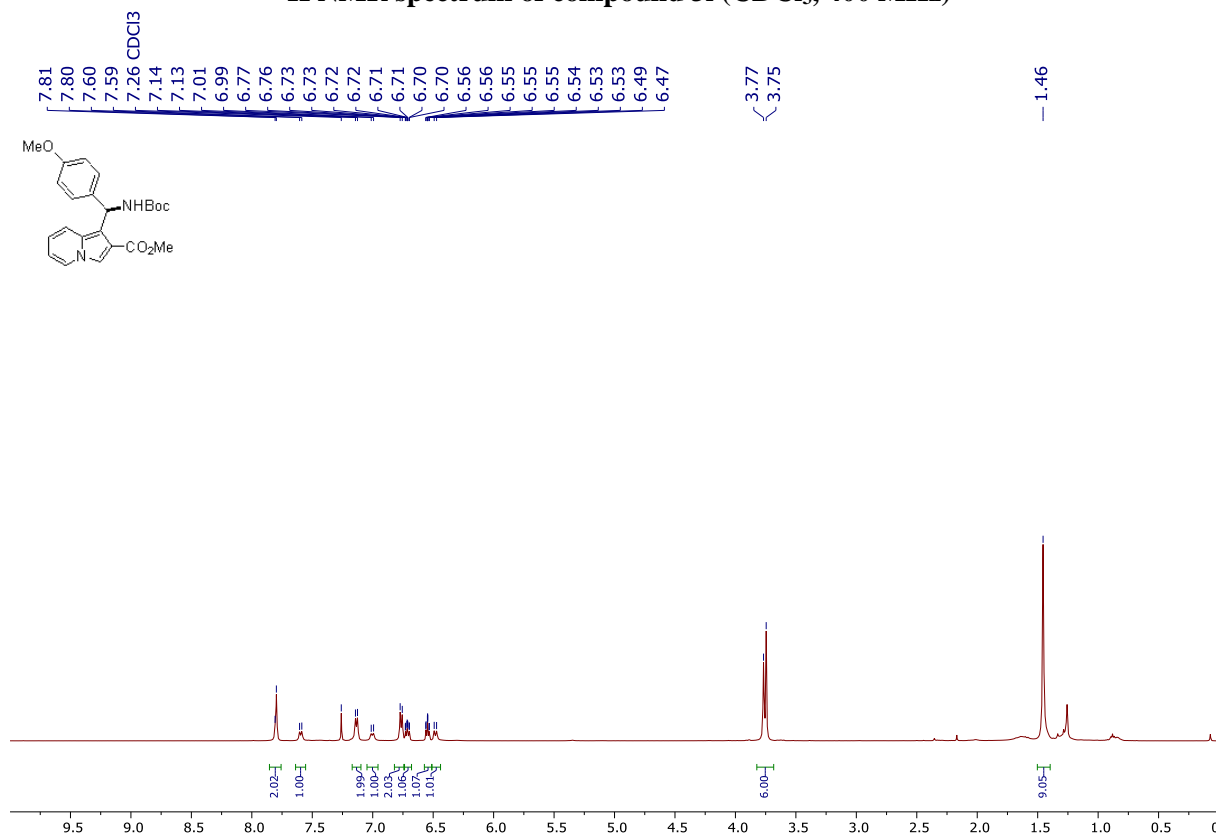

**<sup>13</sup>C NMR spectrum of compound 3i (CDCl<sub>3</sub>, 101 MHz)**

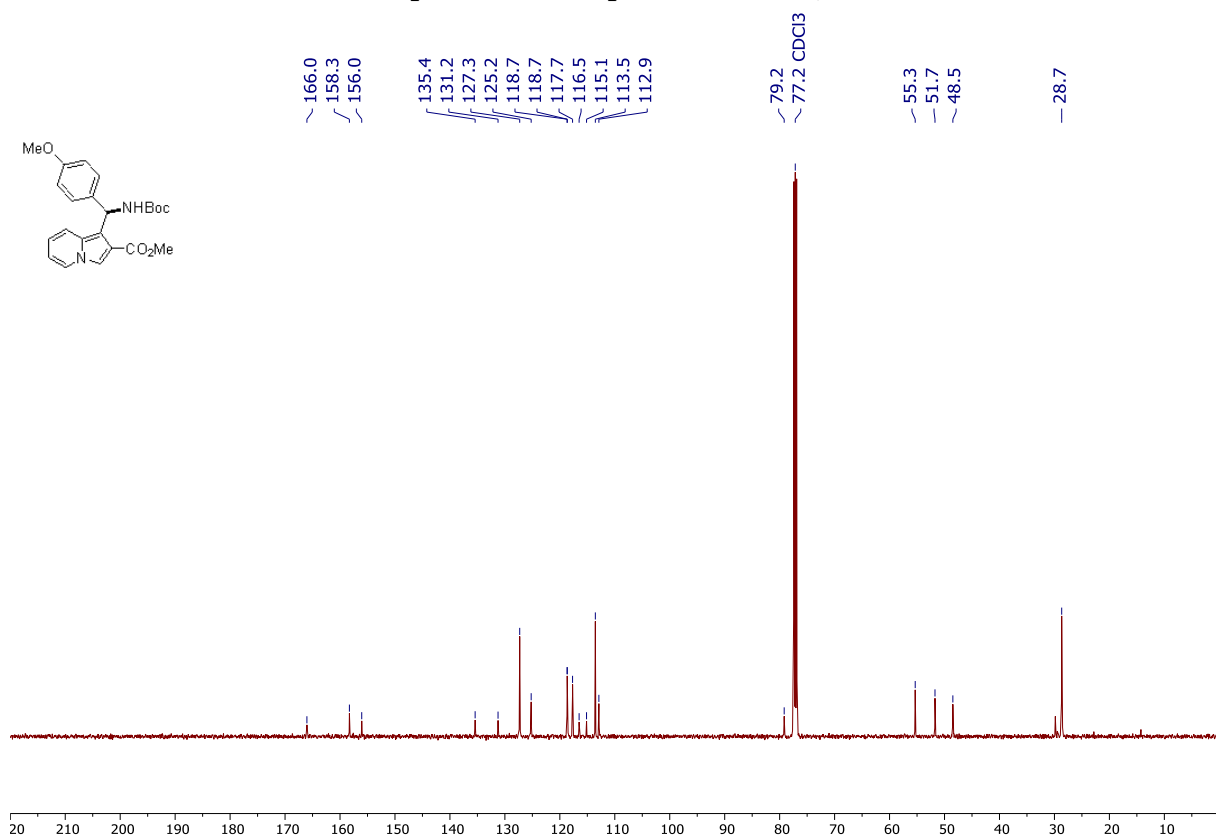



**<sup>1</sup>H NMR spectrum of compound 4j (CDCl<sub>3</sub>, 600 MHz)**

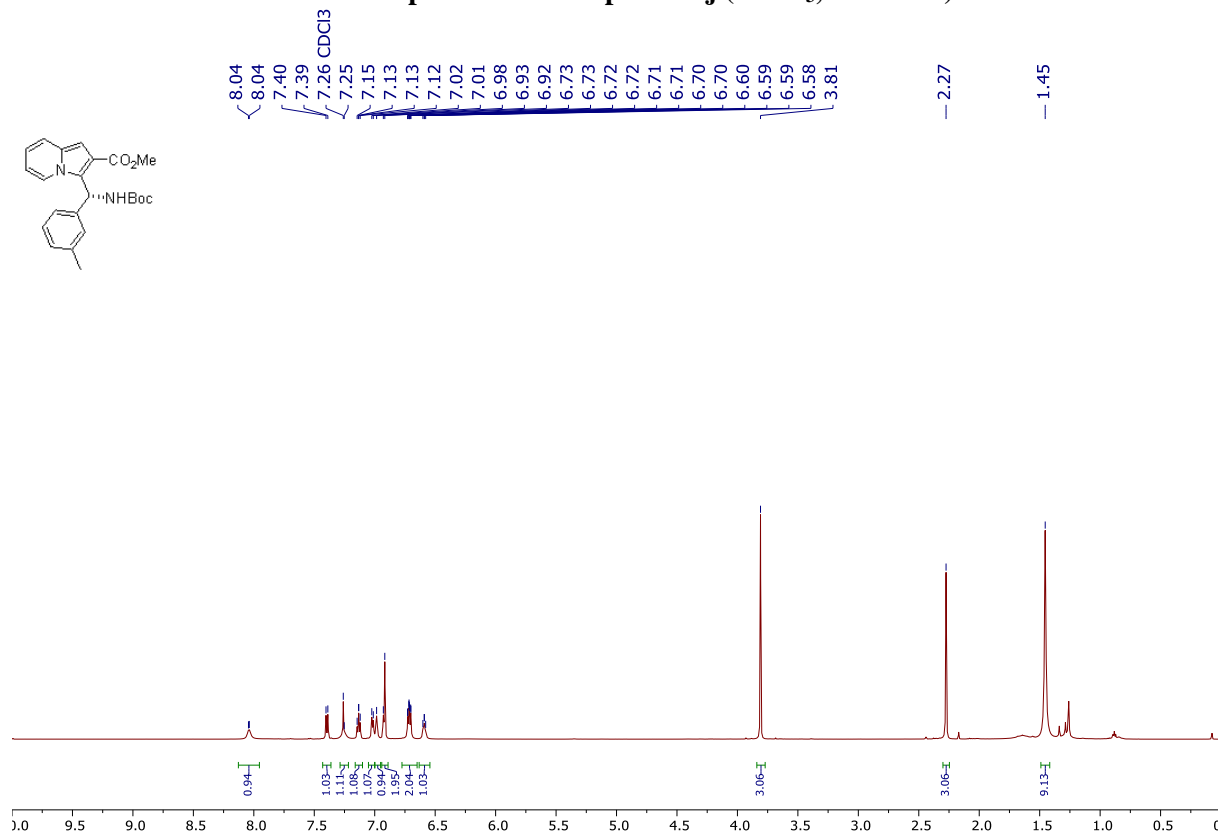

**<sup>13</sup>C NMR spectrum of compound 4j (CDCl<sub>3</sub>, 151 MHz)**

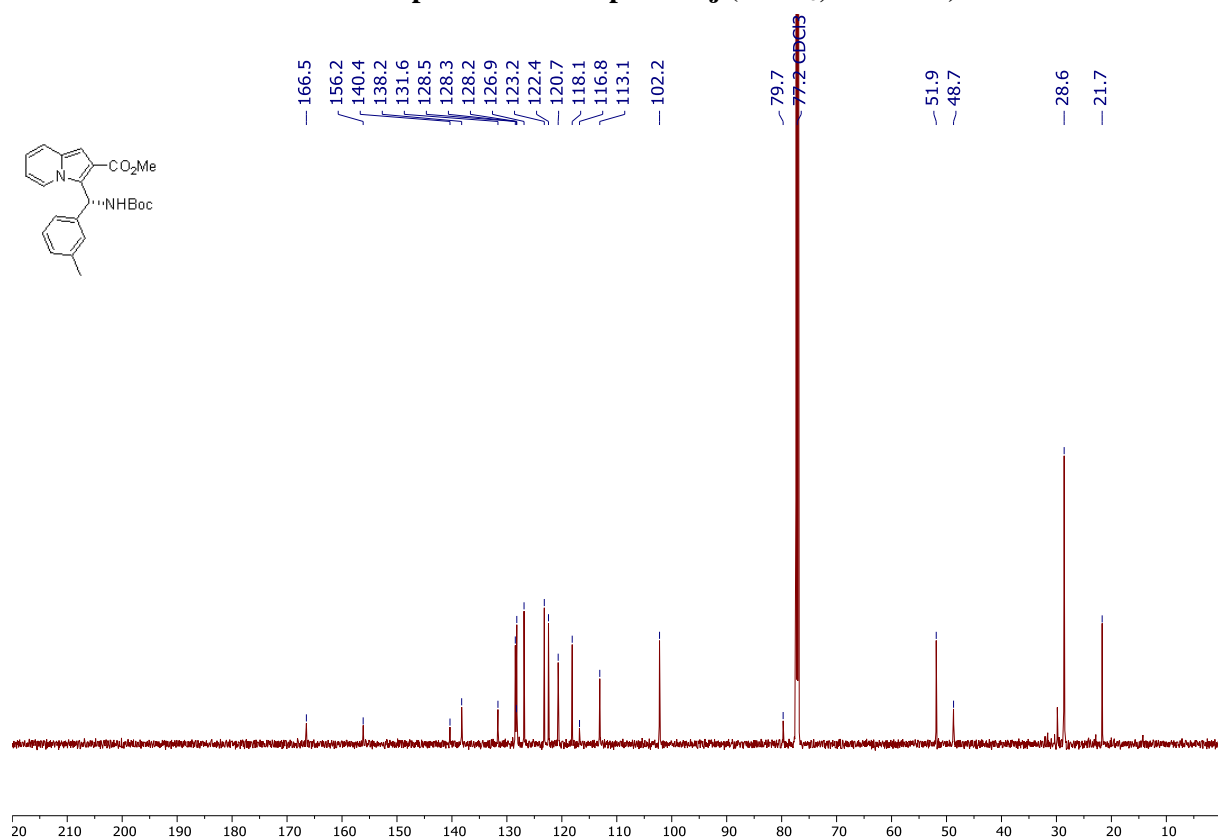

**<sup>1</sup>H NMR spectrum of compound 3j (CDCl<sub>3</sub>, 600 MHz)**

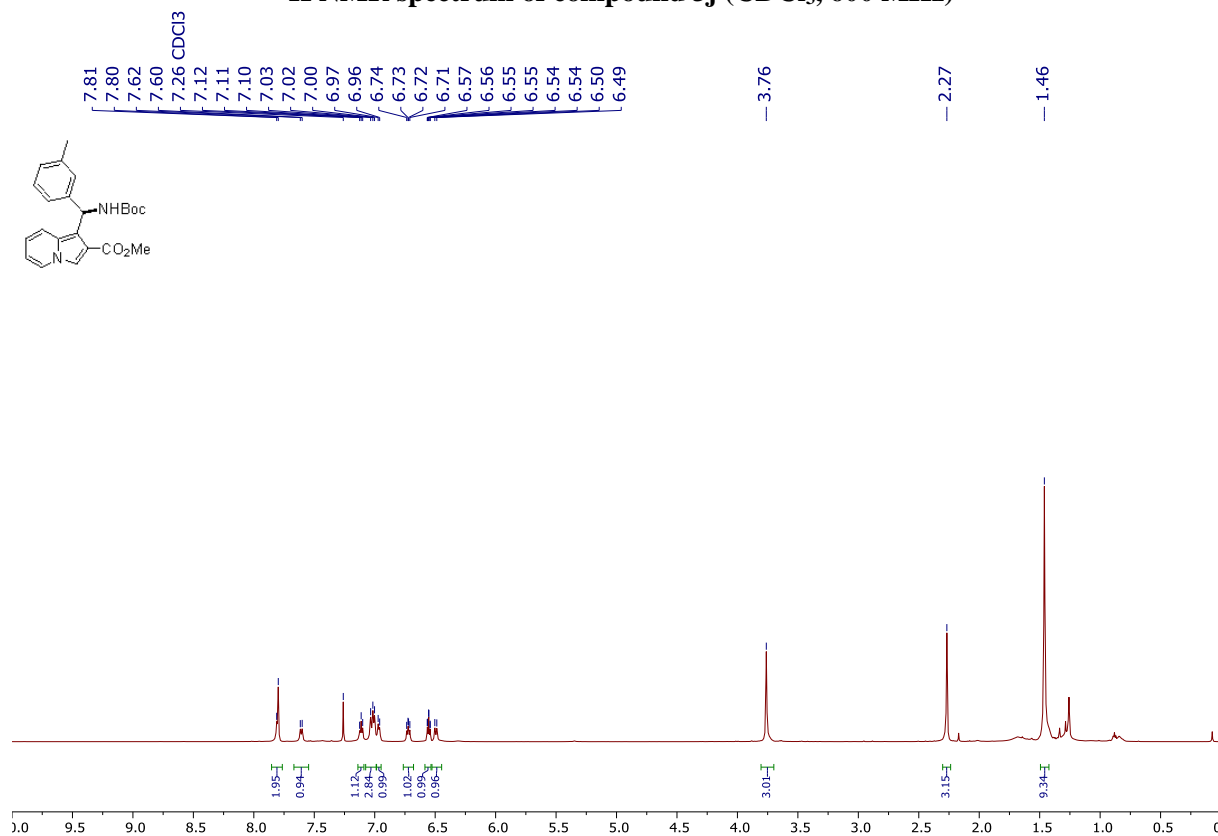

**<sup>13</sup>C NMR spectrum of compound 3j (CDCl<sub>3</sub>, 151 MHz)**

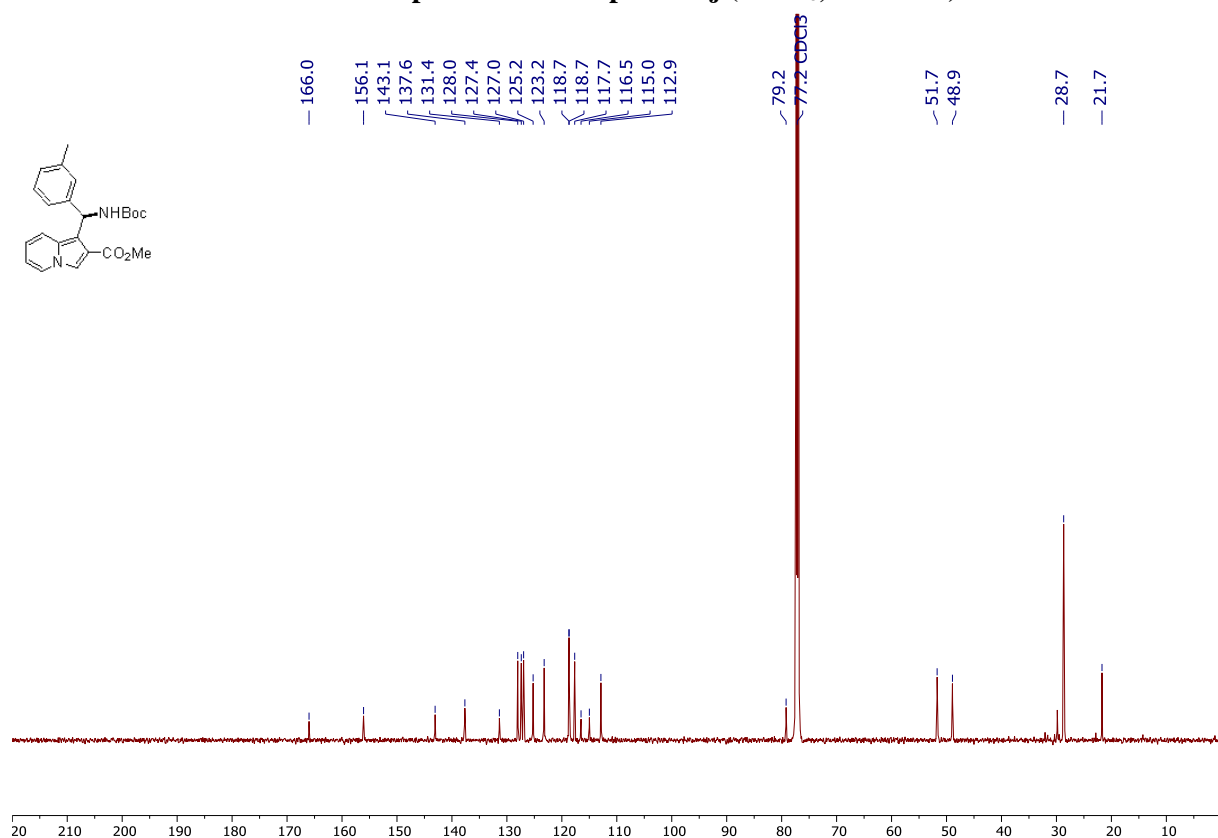

**<sup>1</sup>H NMR spectrum of compound 4k (CDCl<sub>3</sub>, 500 MHz)**

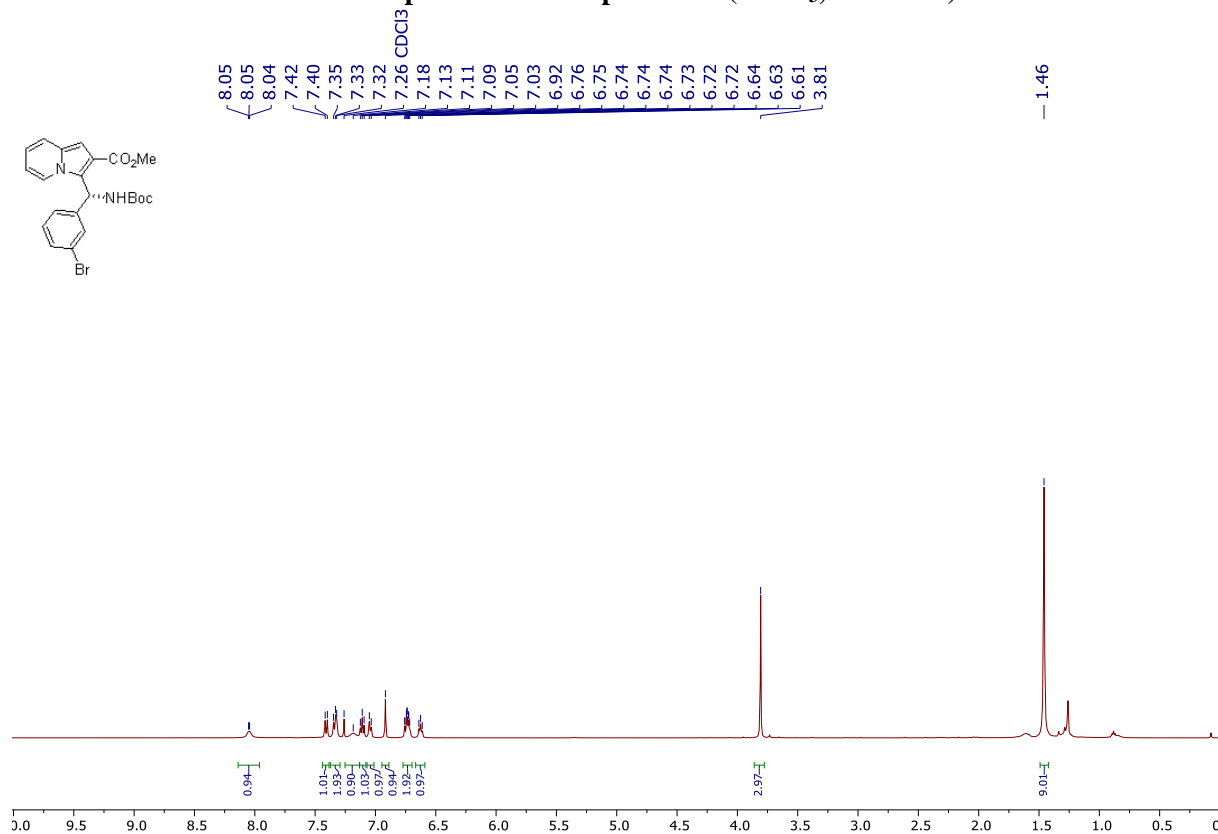

**<sup>13</sup>C NMR spectrum of compound 4k (CDCl<sub>3</sub>, 126 MHz)**

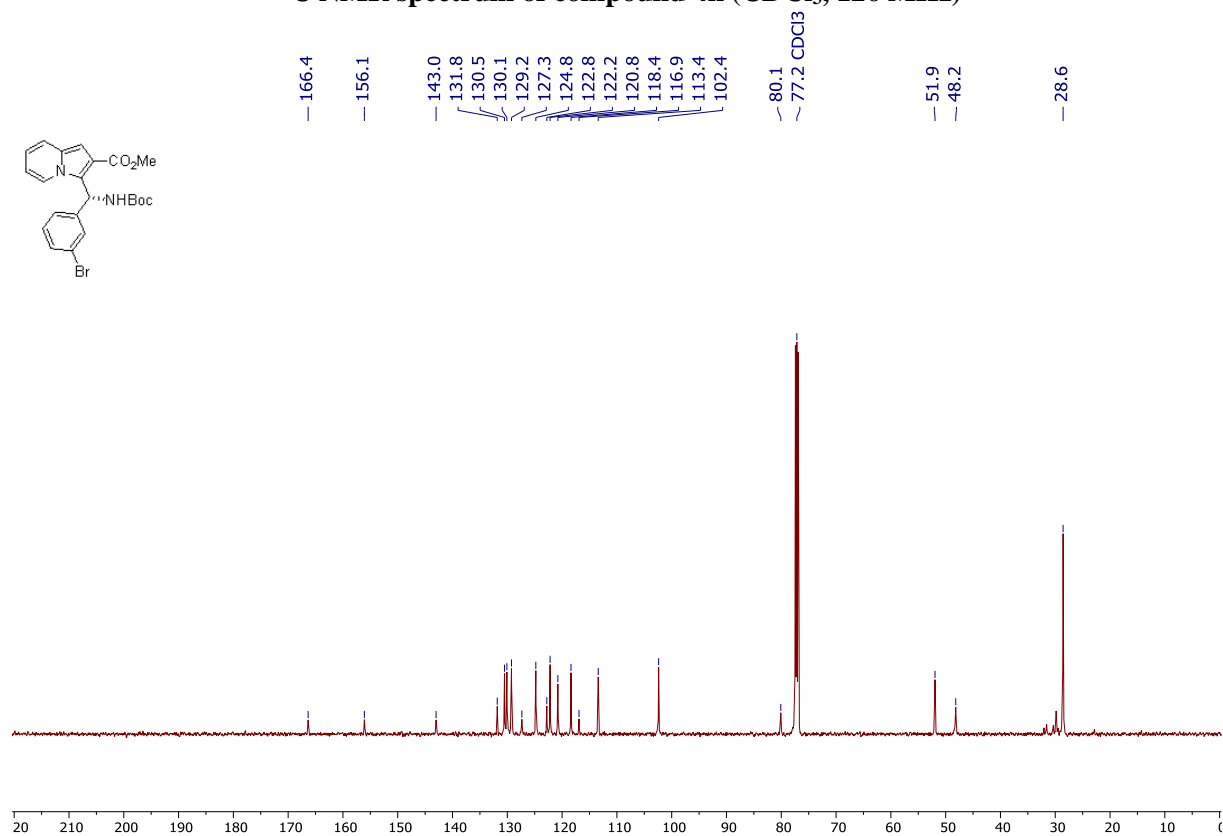

**<sup>1</sup>H NMR spectrum of compound 3k (CDCl<sub>3</sub>, 500 MHz)**

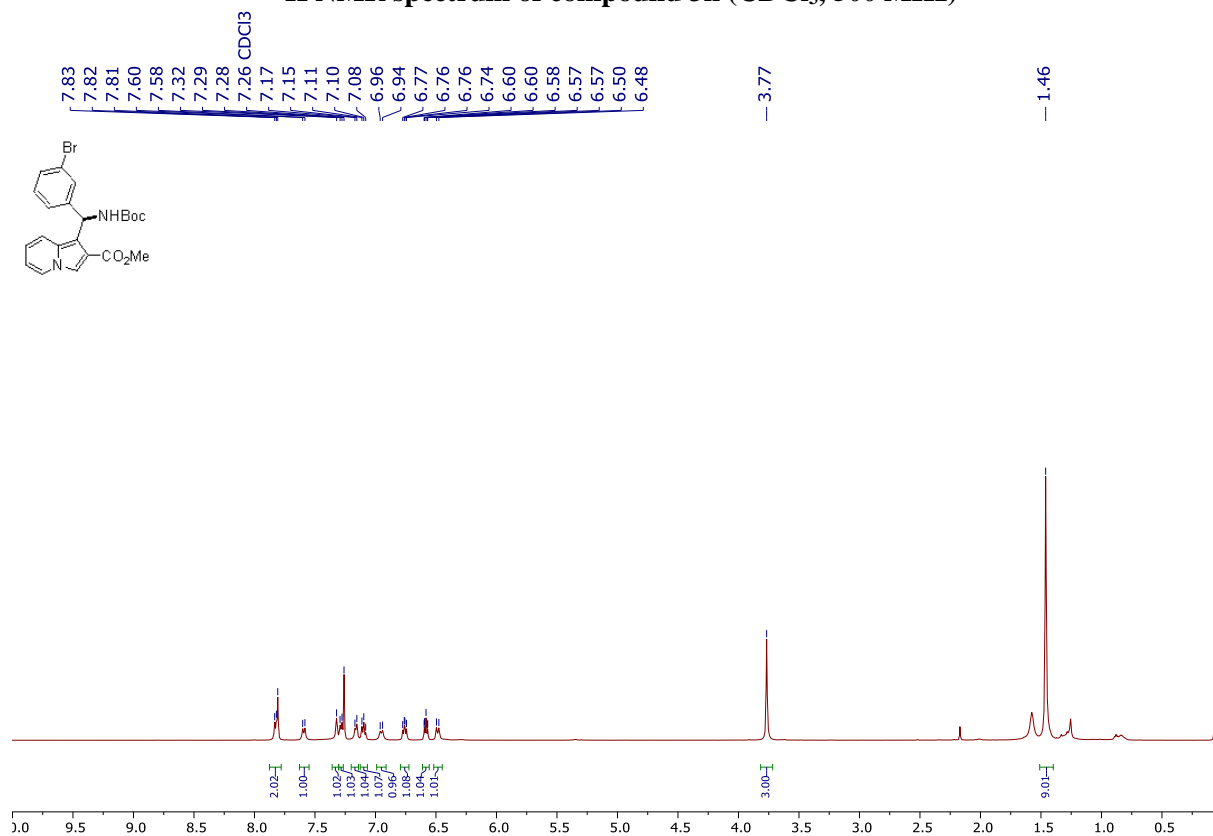

**<sup>13</sup>C NMR spectrum of compound 3k (CDCl<sub>3</sub>, 126 MHz)**

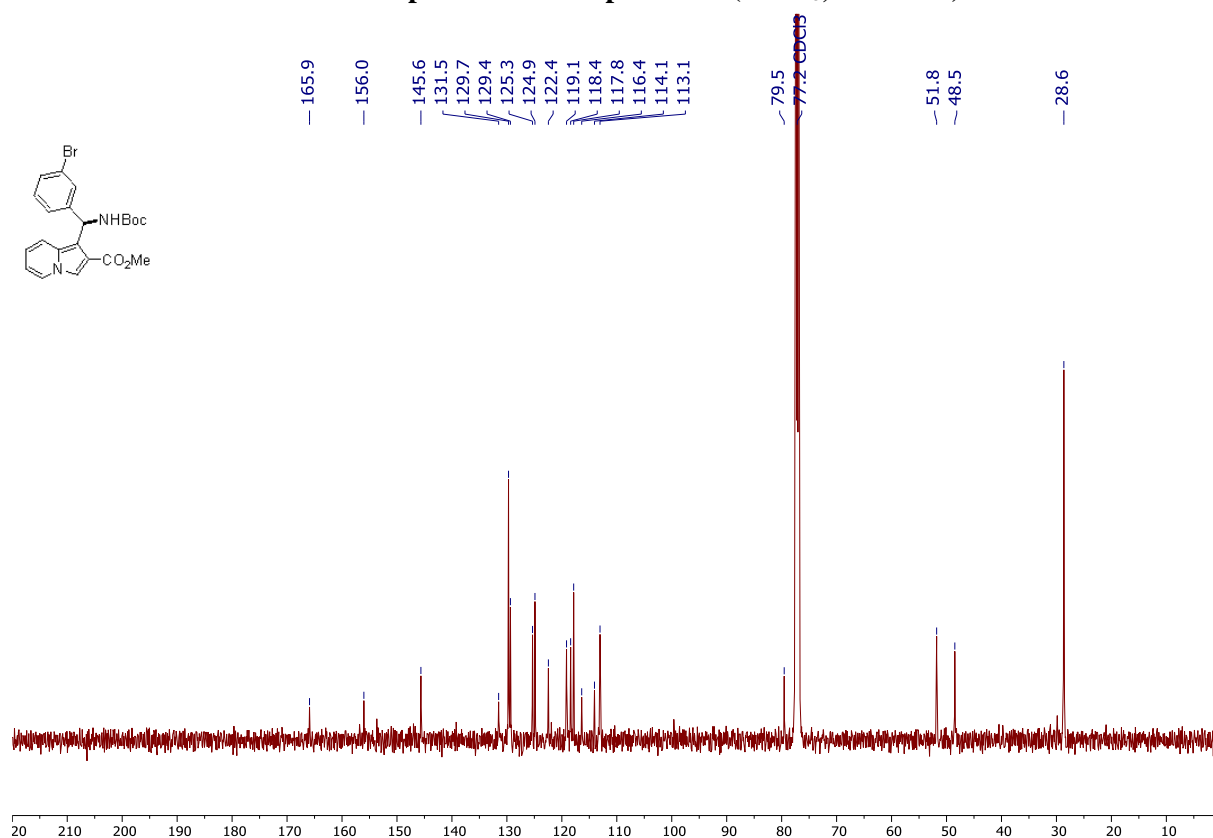

**<sup>1</sup>H NMR spectrum of compound 4l (CDCl<sub>3</sub>, 600 MHz)**

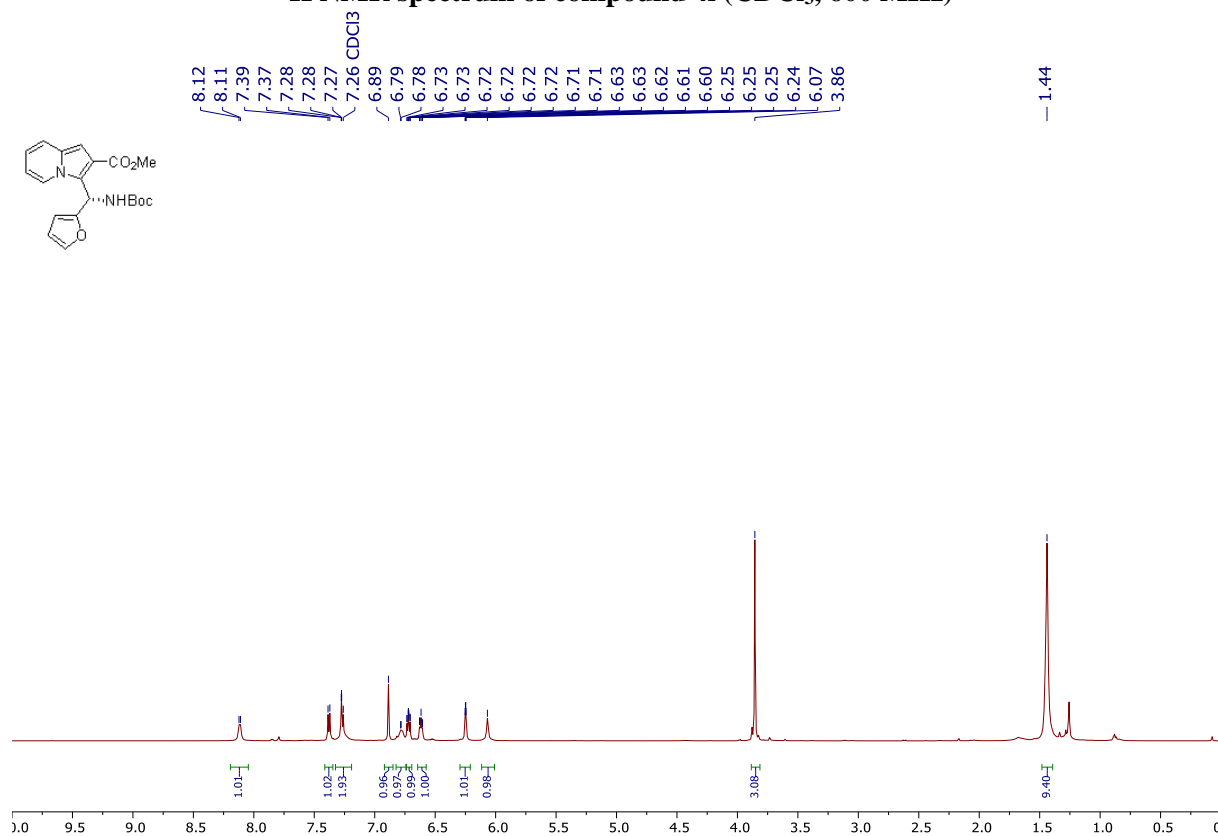

**<sup>13</sup>C NMR spectrum of compound 4l (CDCl<sub>3</sub>, 151 MHz)**

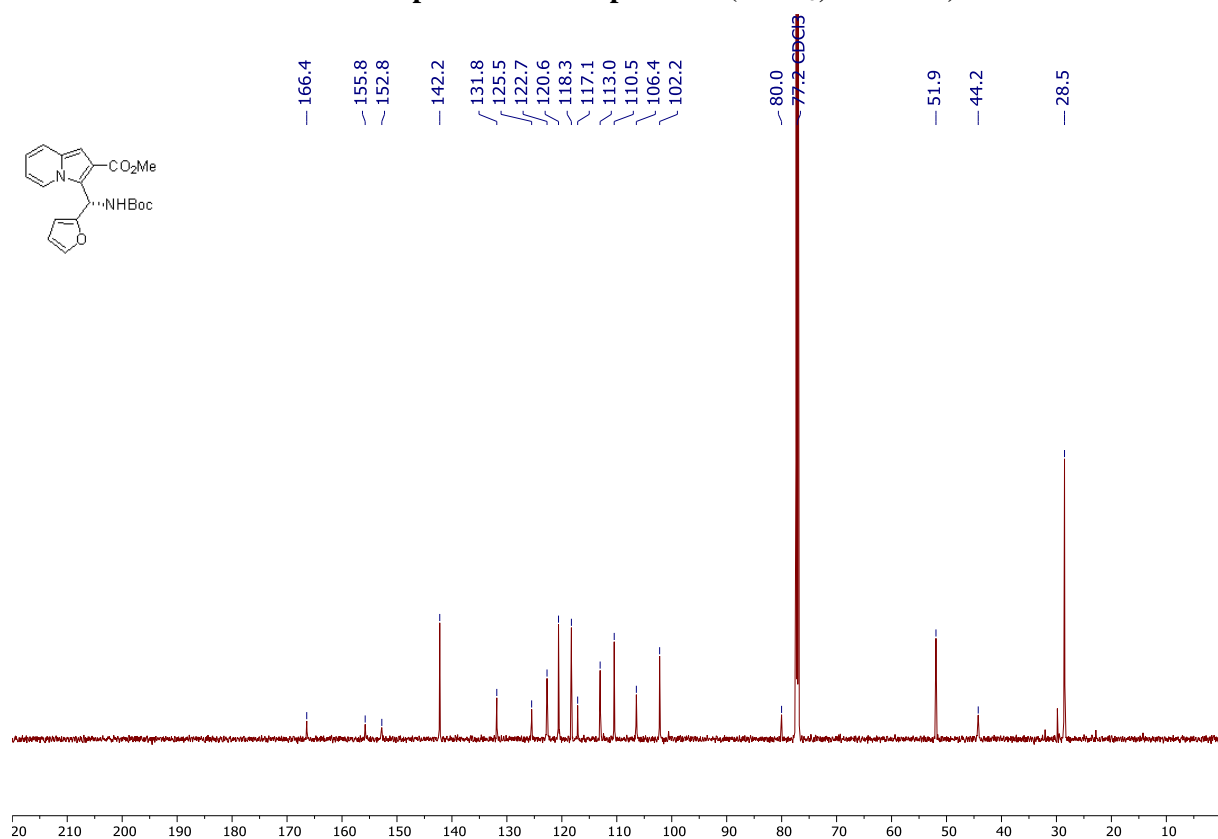

**<sup>1</sup>H NMR spectrum of compound 3l (CDCl<sub>3</sub>, 500 MHz)**

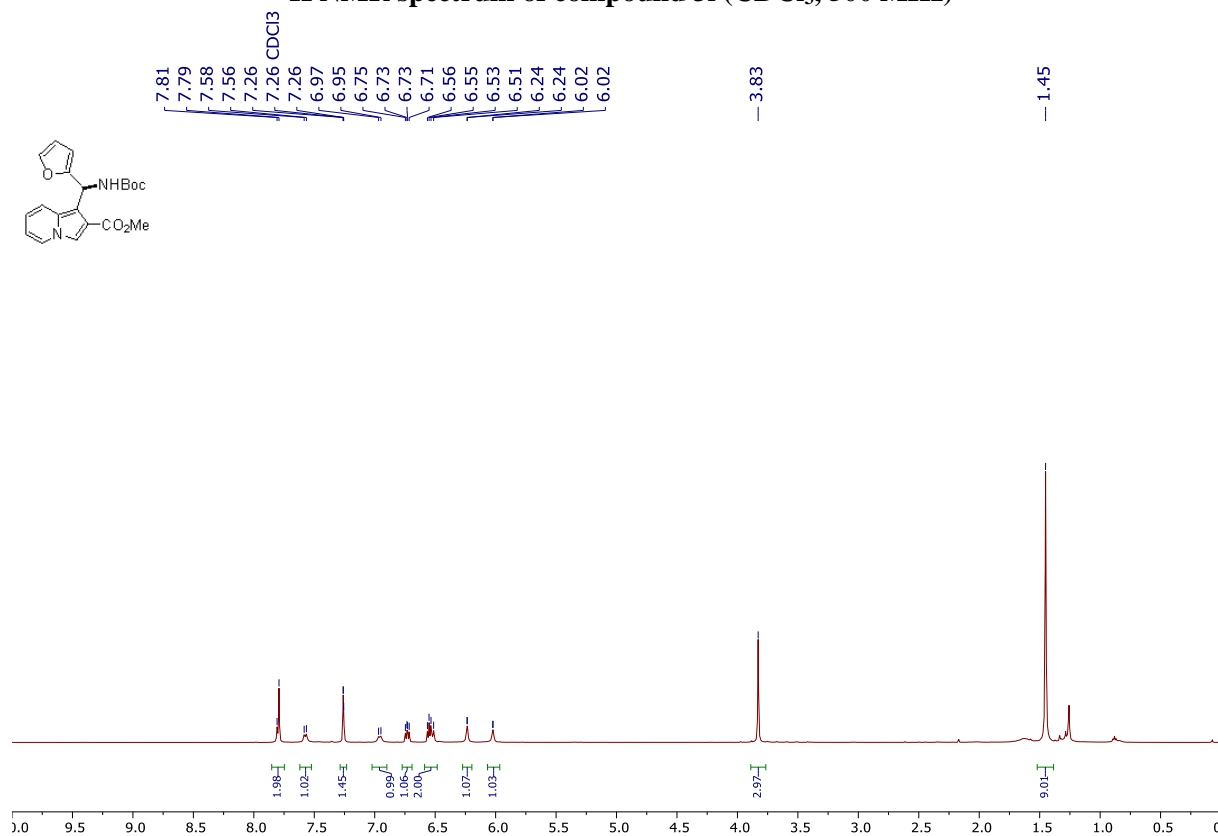

**<sup>13</sup>C NMR spectrum of compound 3l (CDCl<sub>3</sub>, 126 MHz)**

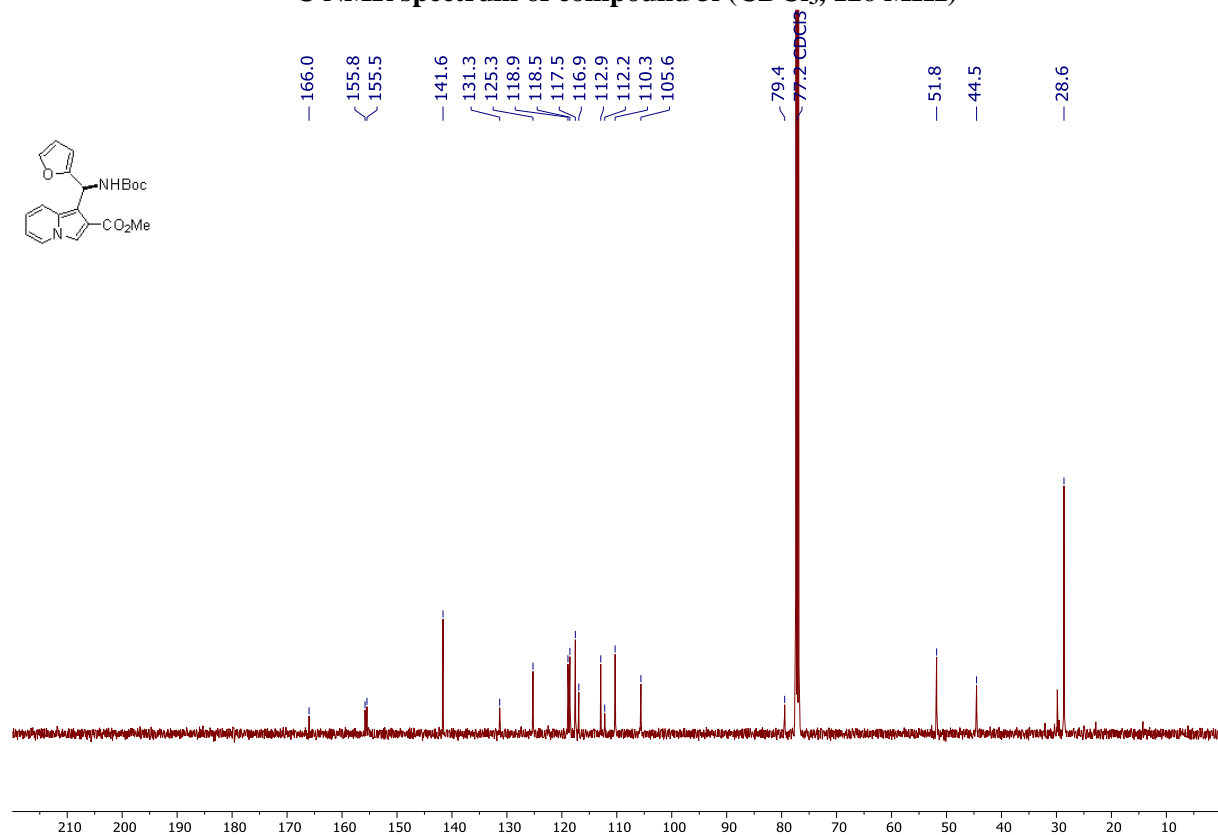

**<sup>1</sup>H NMR spectrum of compound 4m (CDCl<sub>3</sub>, 500 MHz)**

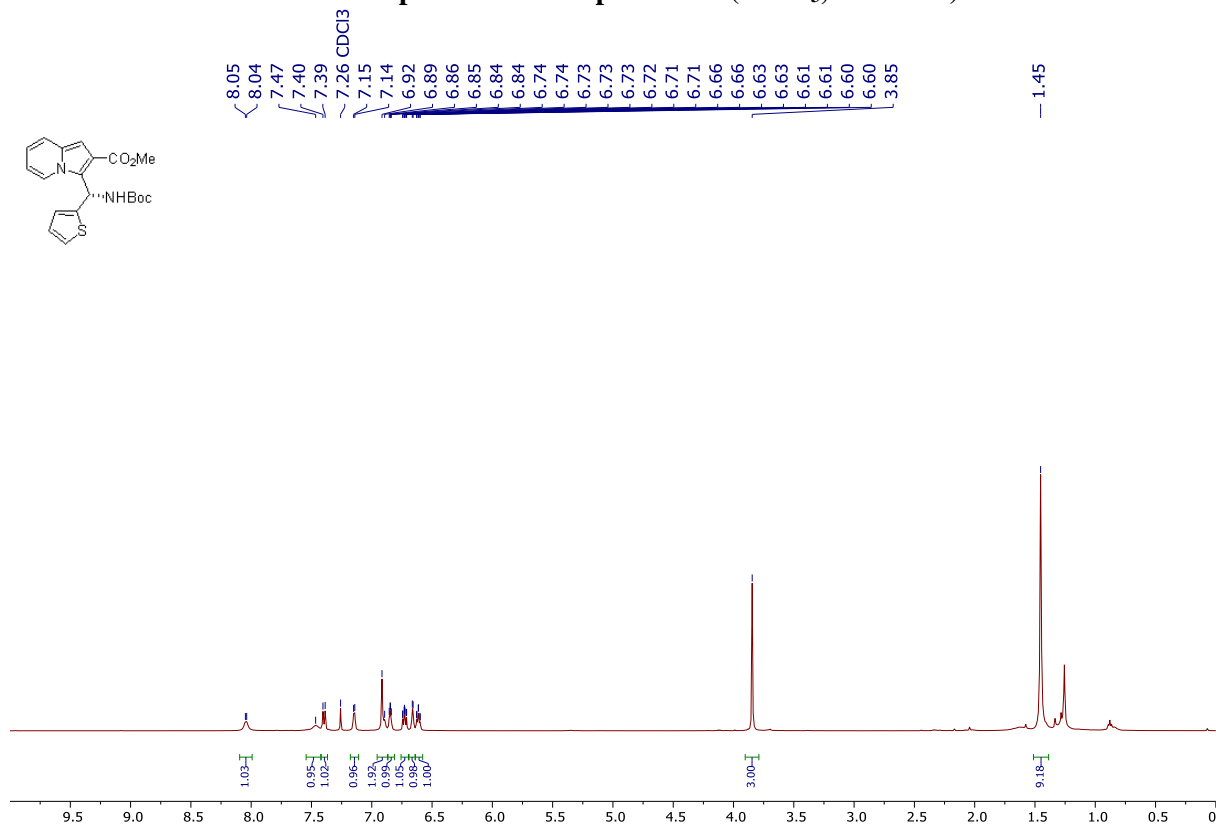

**<sup>13</sup>C NMR spectrum of compound 4m (CDCl<sub>3</sub>, 126 MHz)**

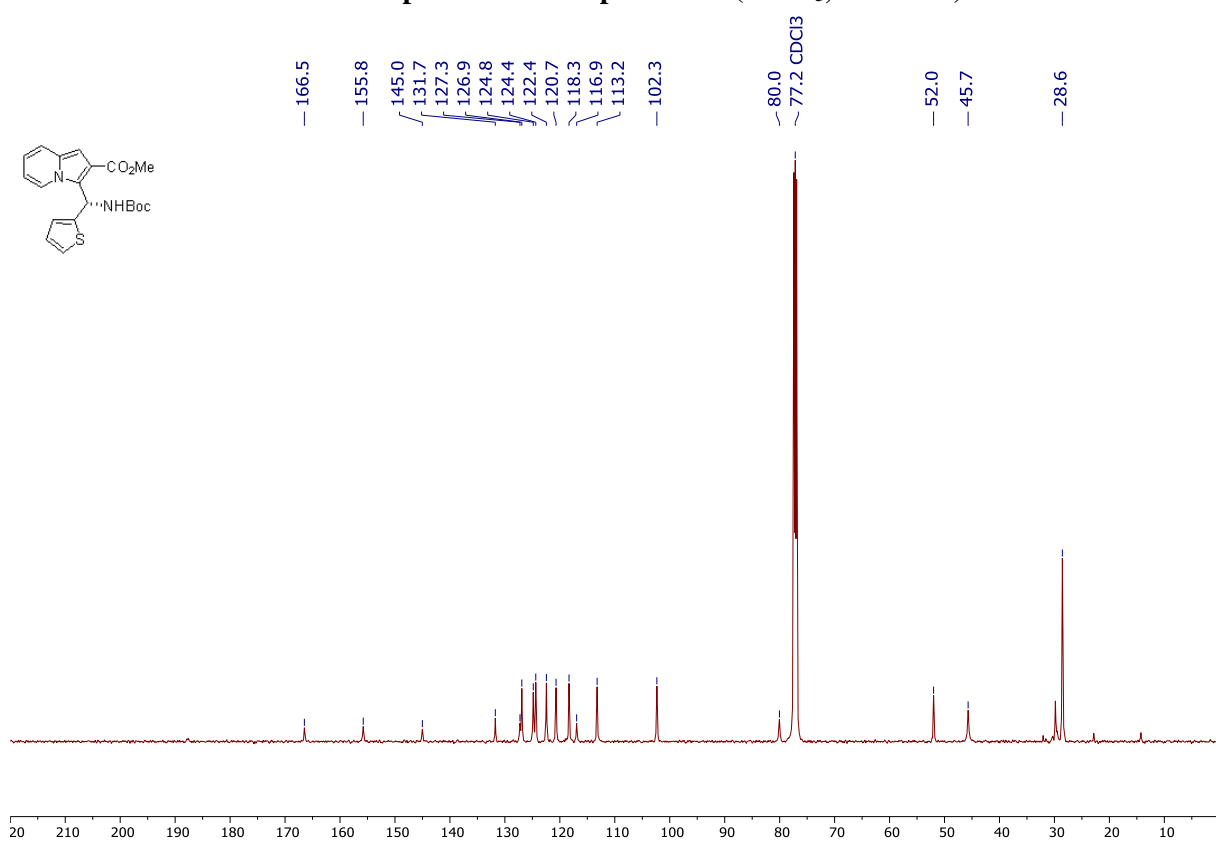

**<sup>1</sup>H NMR spectrum of compound 3m (CDCl<sub>3</sub>, 500 MHz)**

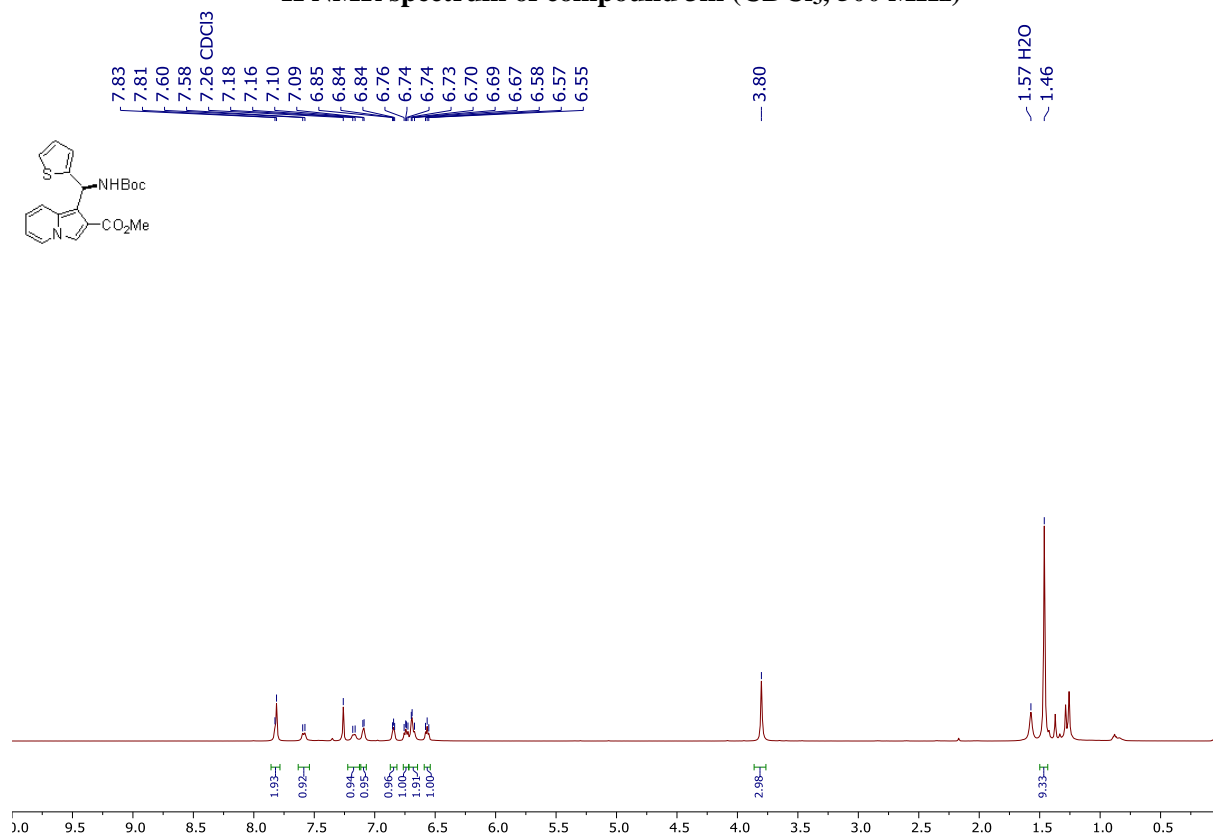

**<sup>13</sup>C NMR spectrum of compound 3m (CDCl<sub>3</sub>, 126 MHz)**

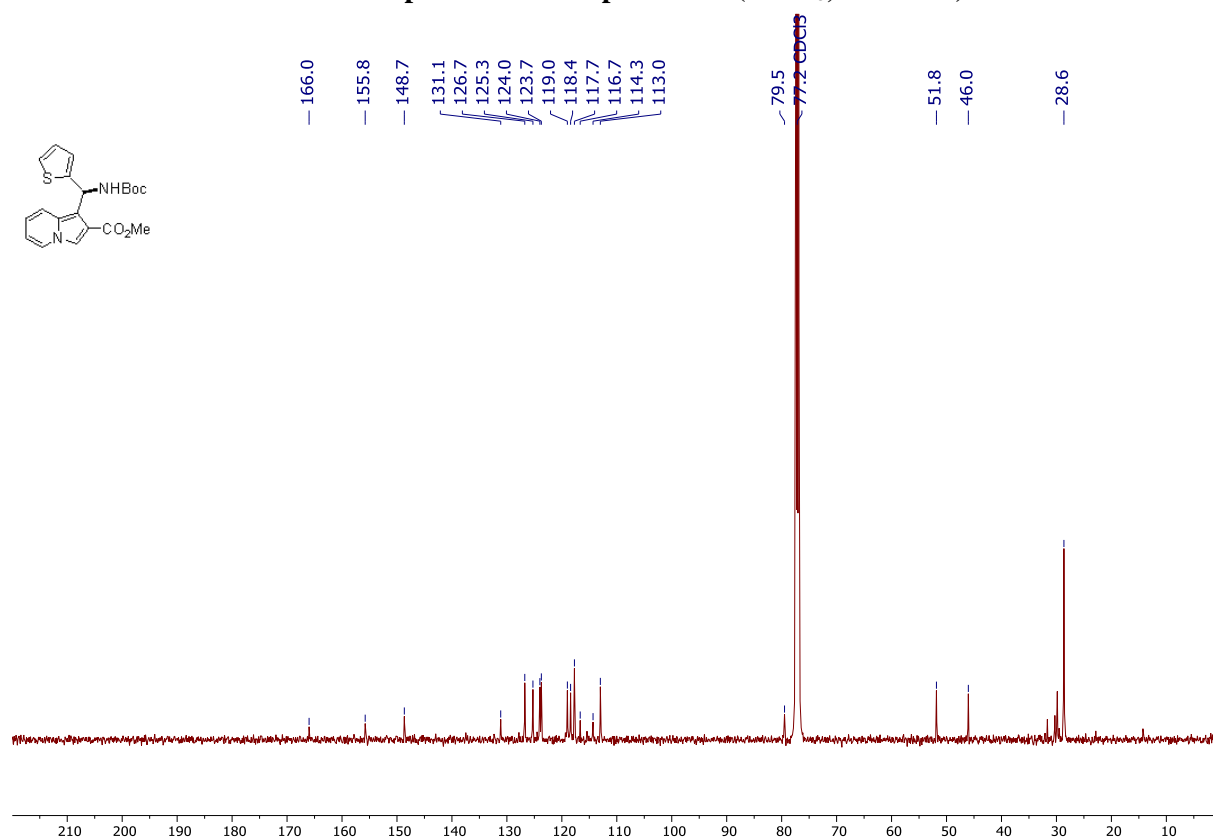



**<sup>1</sup>H NMR spectrum of compound 4n (CDCl<sub>3</sub>, 500 MHz)**

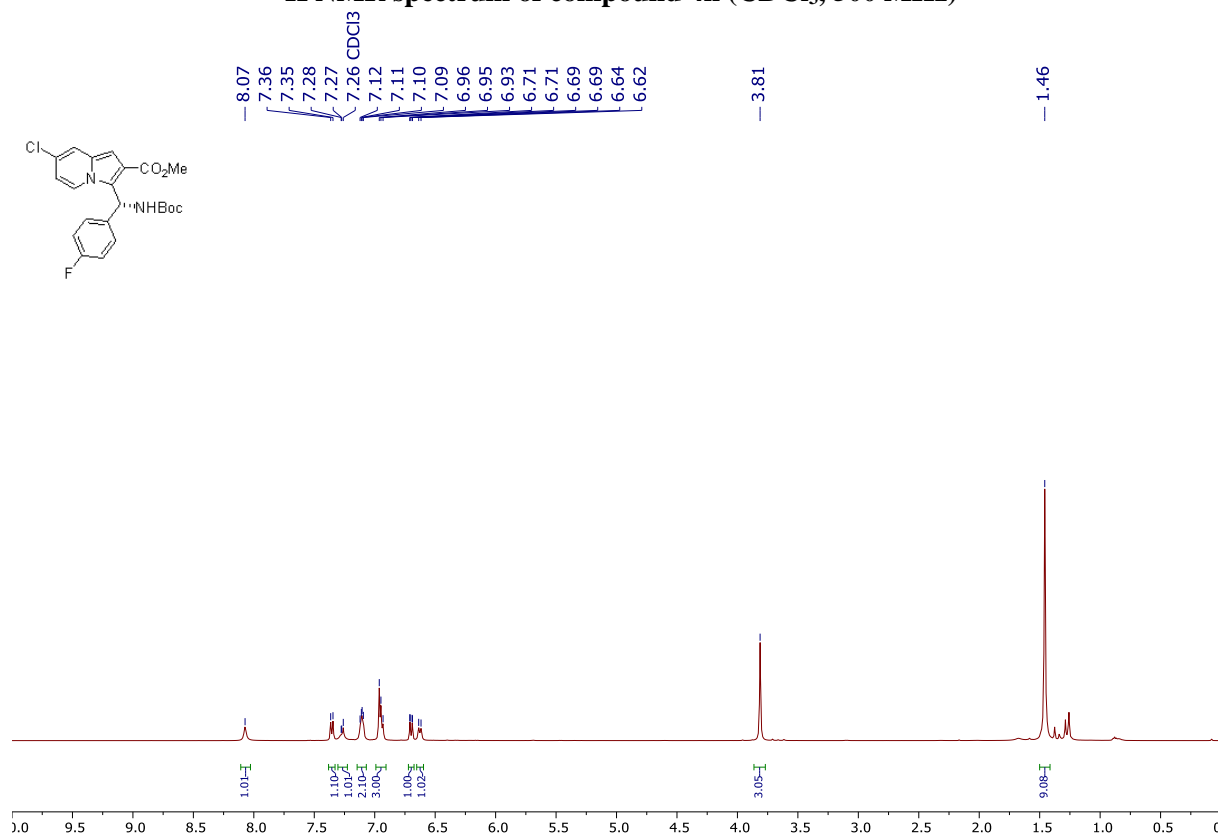

**<sup>13</sup>C NMR spectrum of compound 4n (CDCl<sub>3</sub>, 126 MHz)**

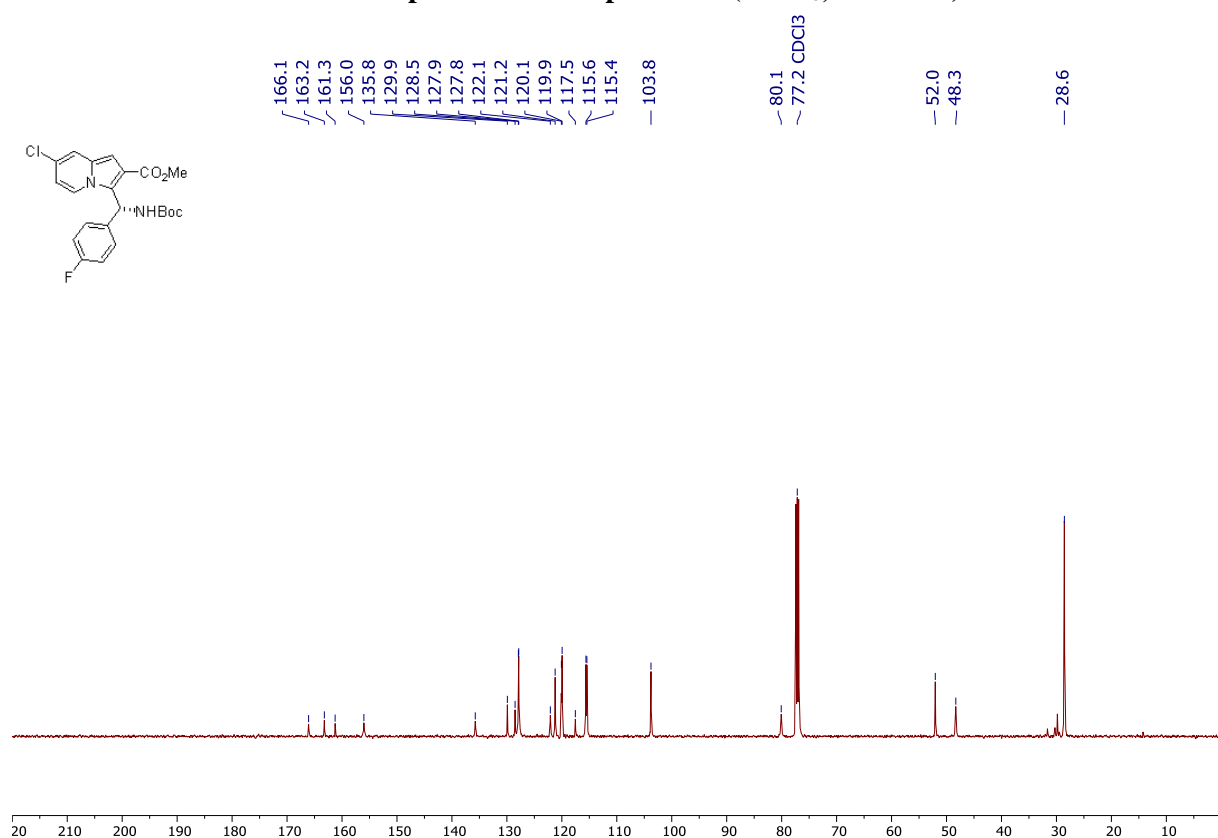

**$^{19}\text{F}$  NMR spectrum of compound 4n ( $\text{CDCl}_3$ , 470 MHz)**

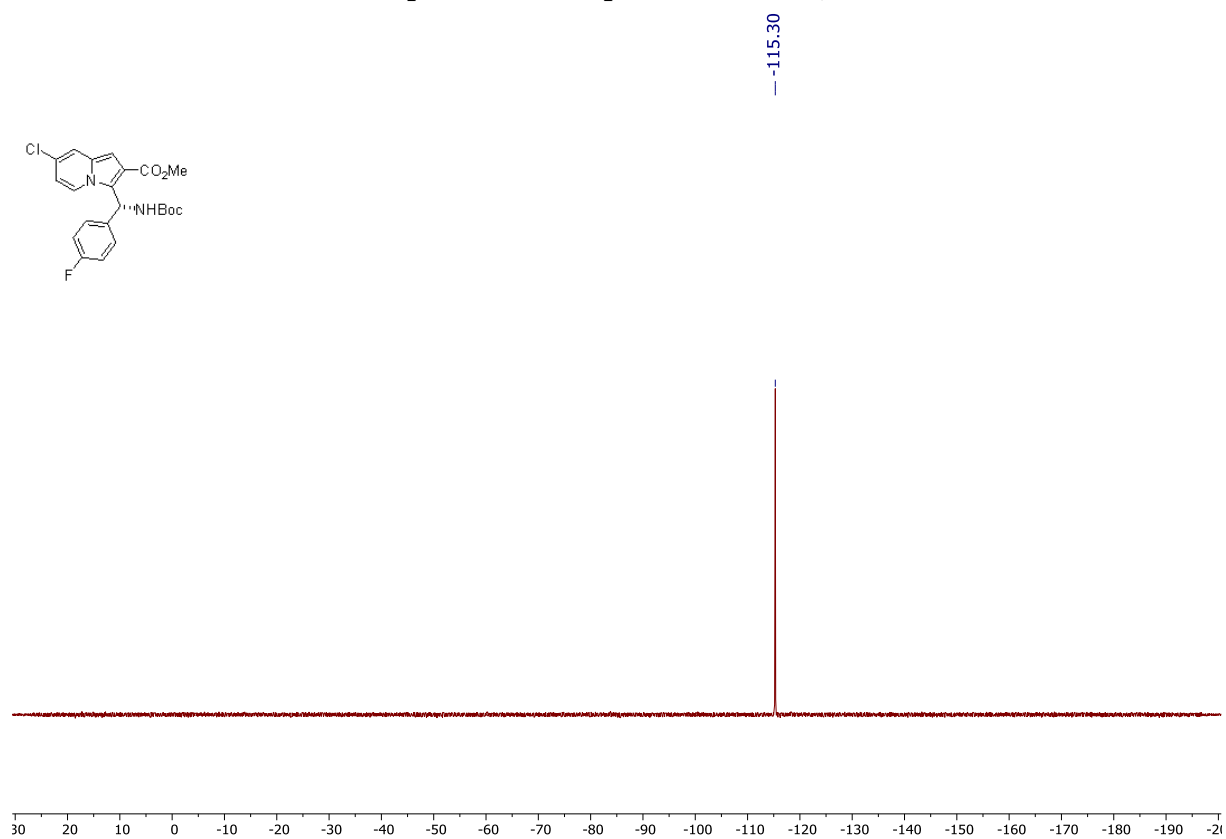

**<sup>1</sup>H NMR spectrum of compound 3n (CDCl<sub>3</sub>, 500 MHz)**

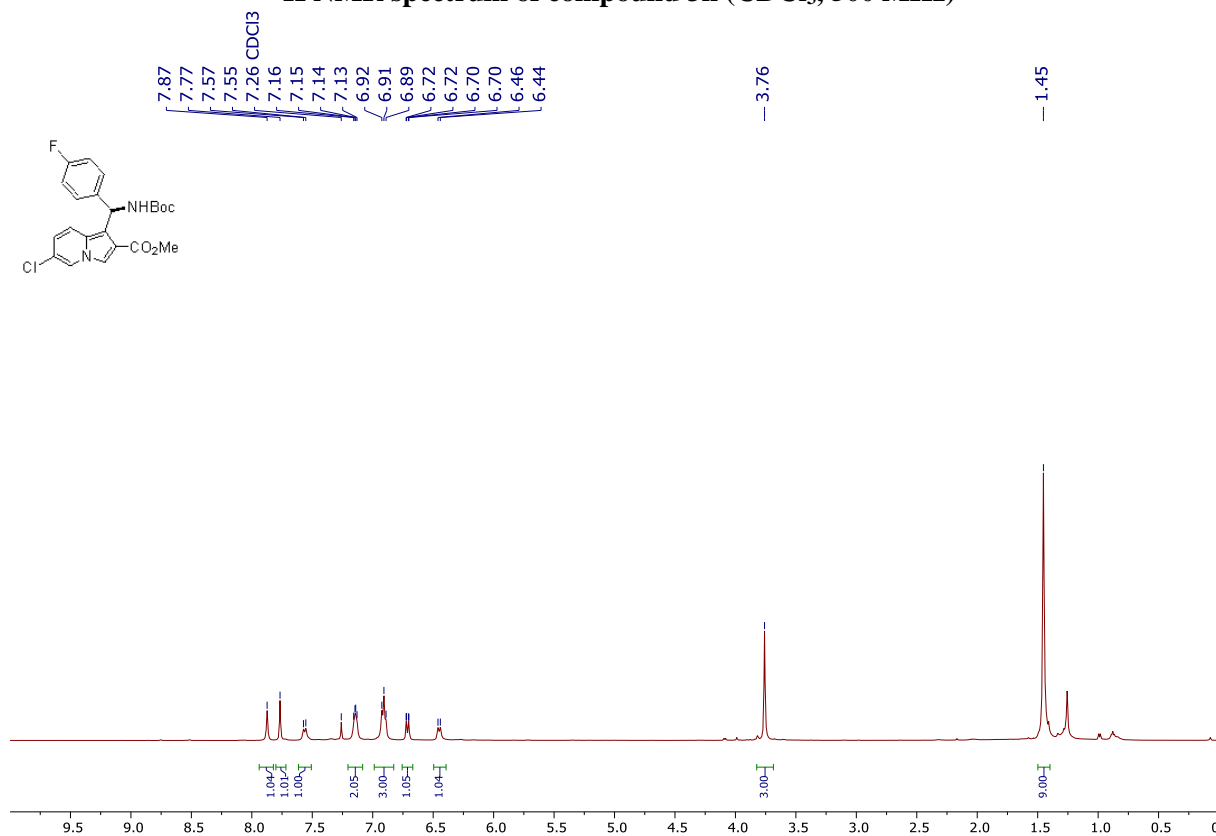

**<sup>13</sup>C NMR spectrum of compound 3n (CDCl<sub>3</sub>, 126 MHz)**

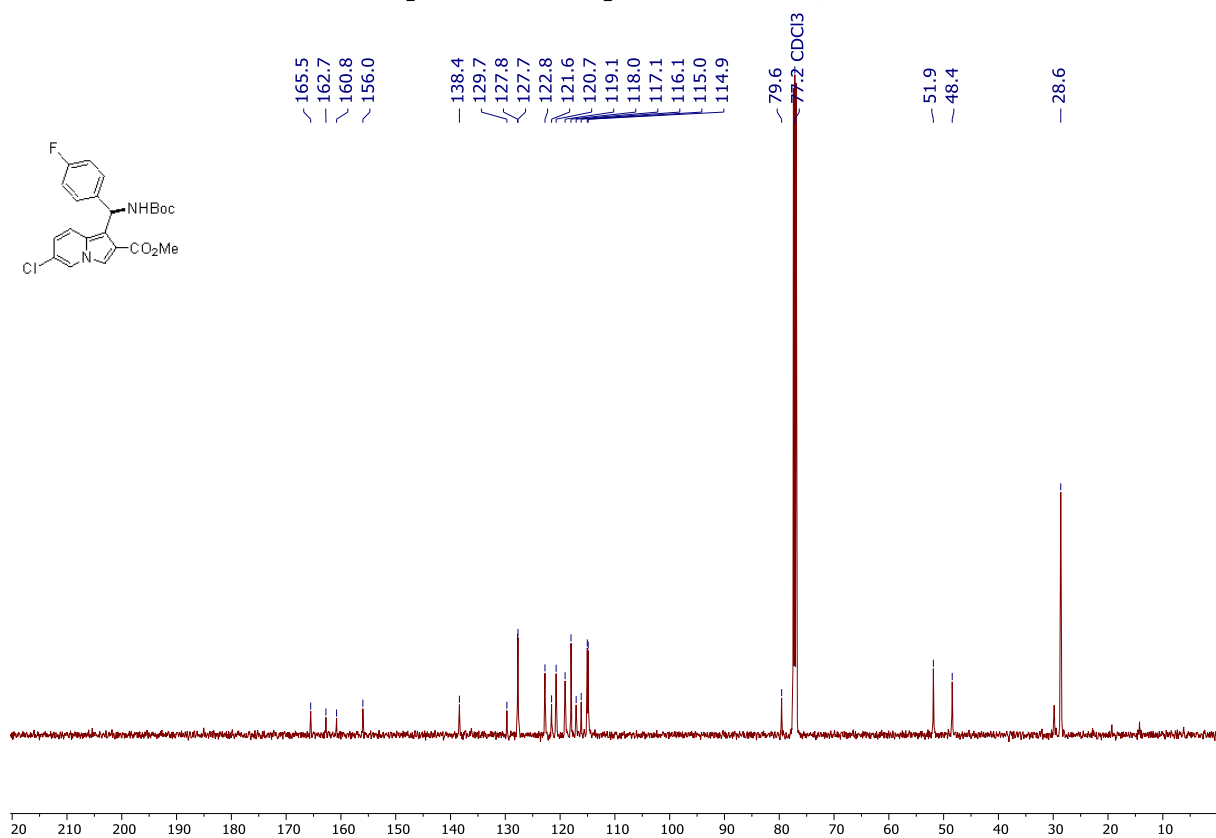

**$^{19}\text{F}$  NMR spectrum of compound 3n ( $\text{CDCl}_3$ , 470 MHz)**

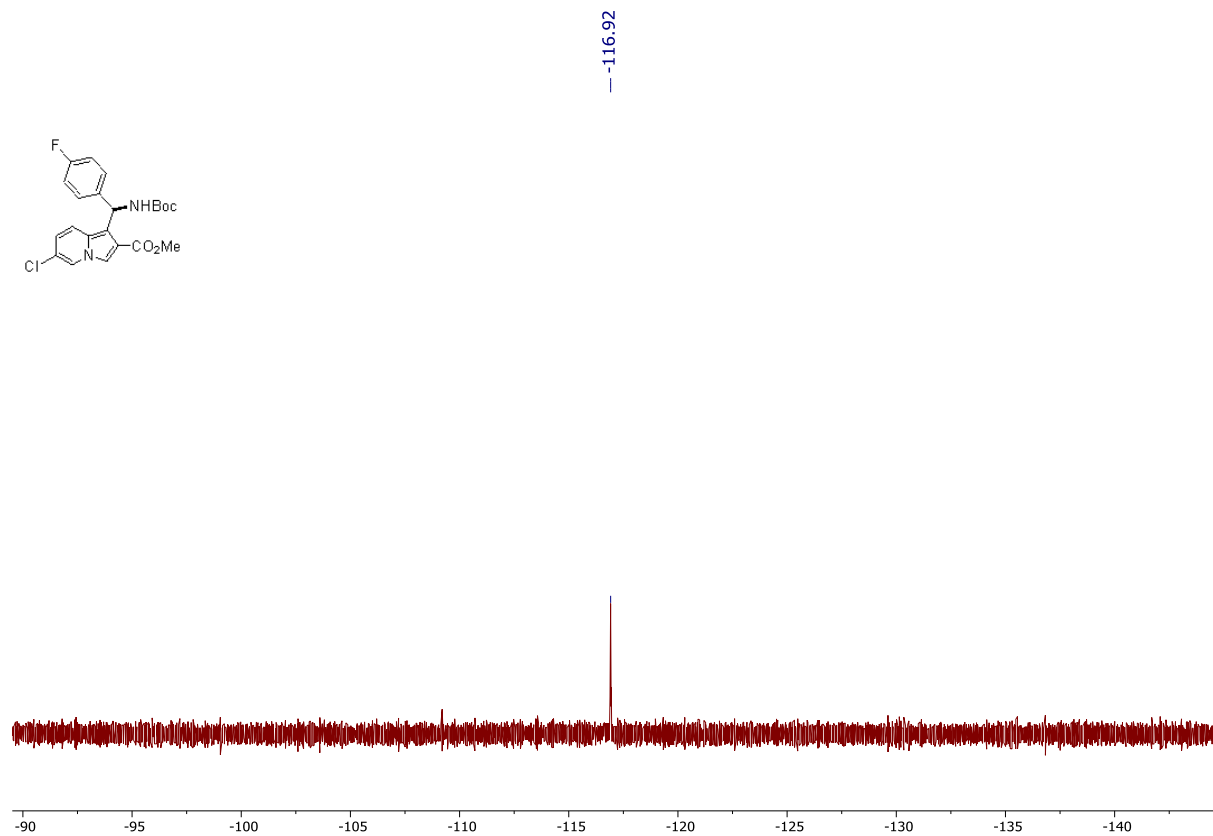

**<sup>1</sup>H NMR spectrum of compound 4o (CDCl<sub>3</sub>, 500 MHz)**

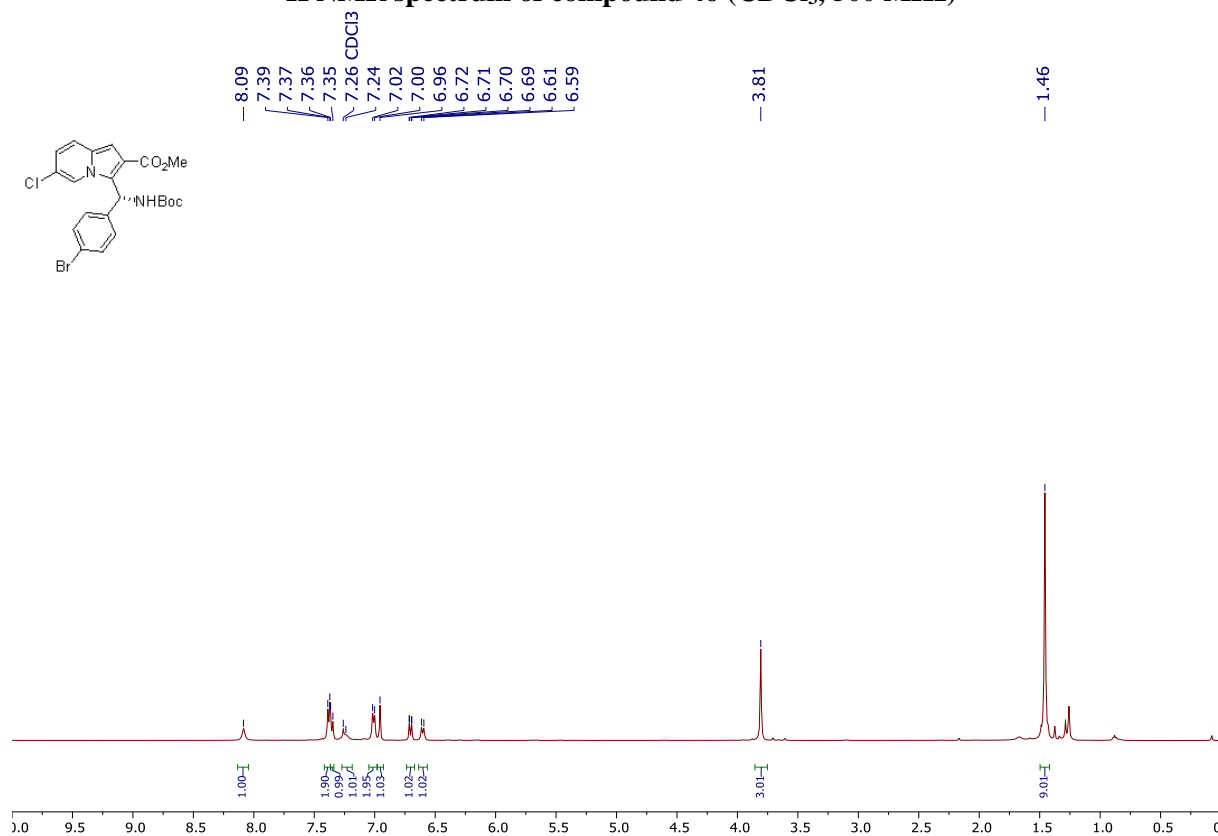

**<sup>13</sup>C NMR spectrum of compound 4o (CDCl<sub>3</sub>, 50 MHz)**

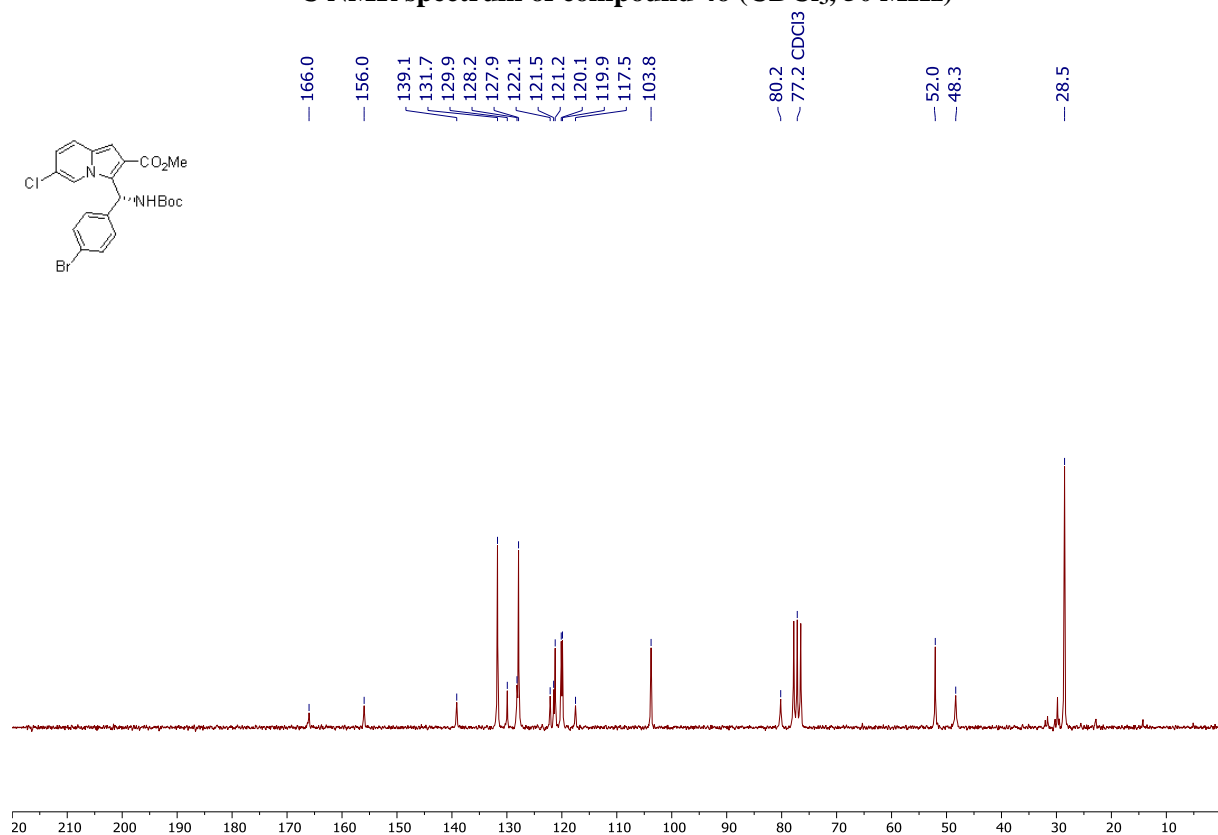

**<sup>1</sup>H NMR spectrum of compound 3o (CDCl<sub>3</sub>, 500 MHz)**

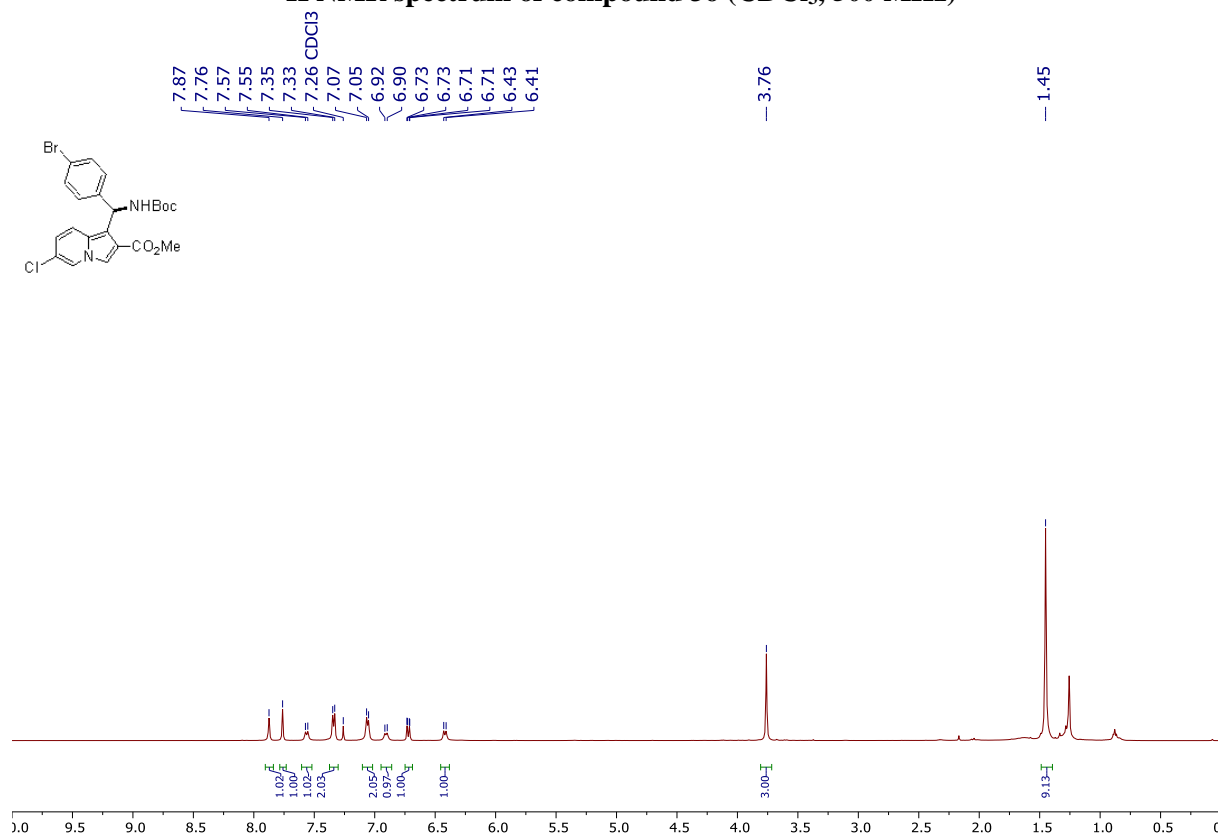

**<sup>13</sup>C NMR spectrum of compound 3o (CDCl<sub>3</sub>, 151 MHz)**

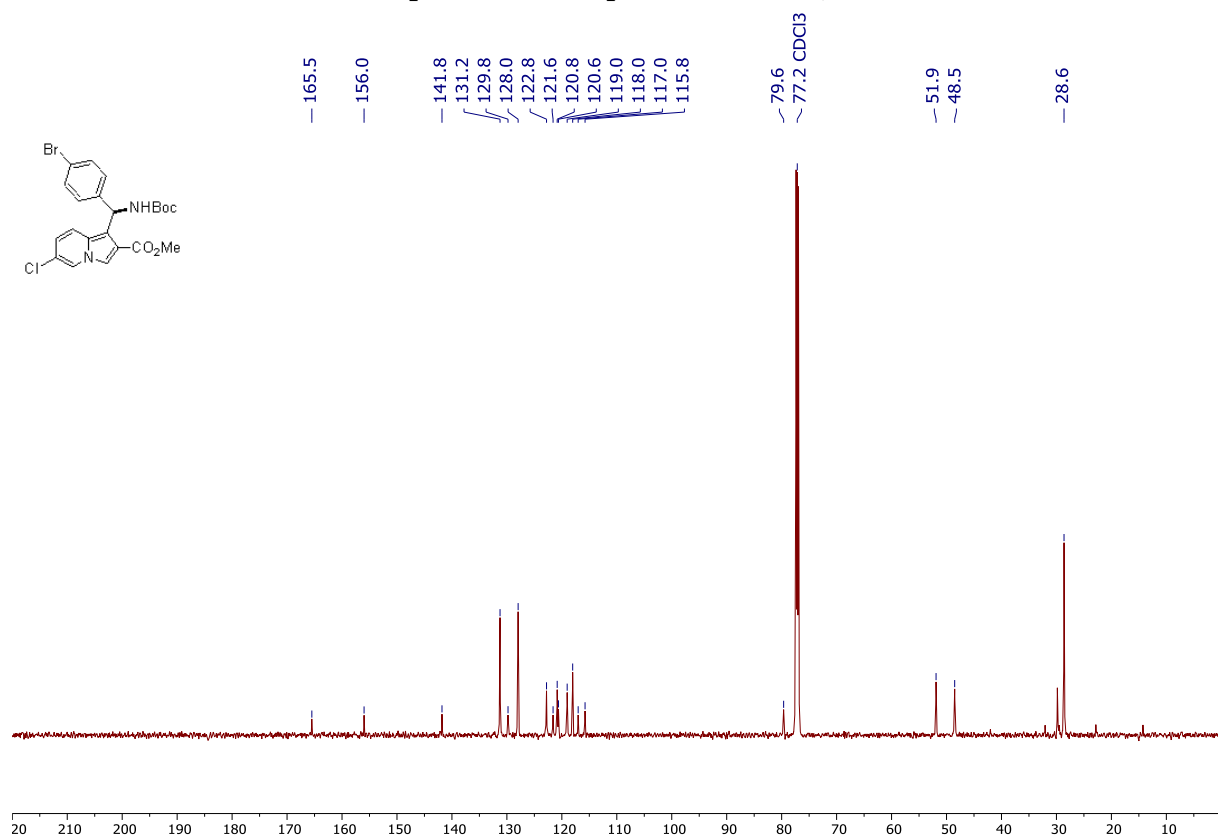

**<sup>1</sup>H NMR spectrum of compound 4p (CDCl<sub>3</sub>, 500 MHz)**

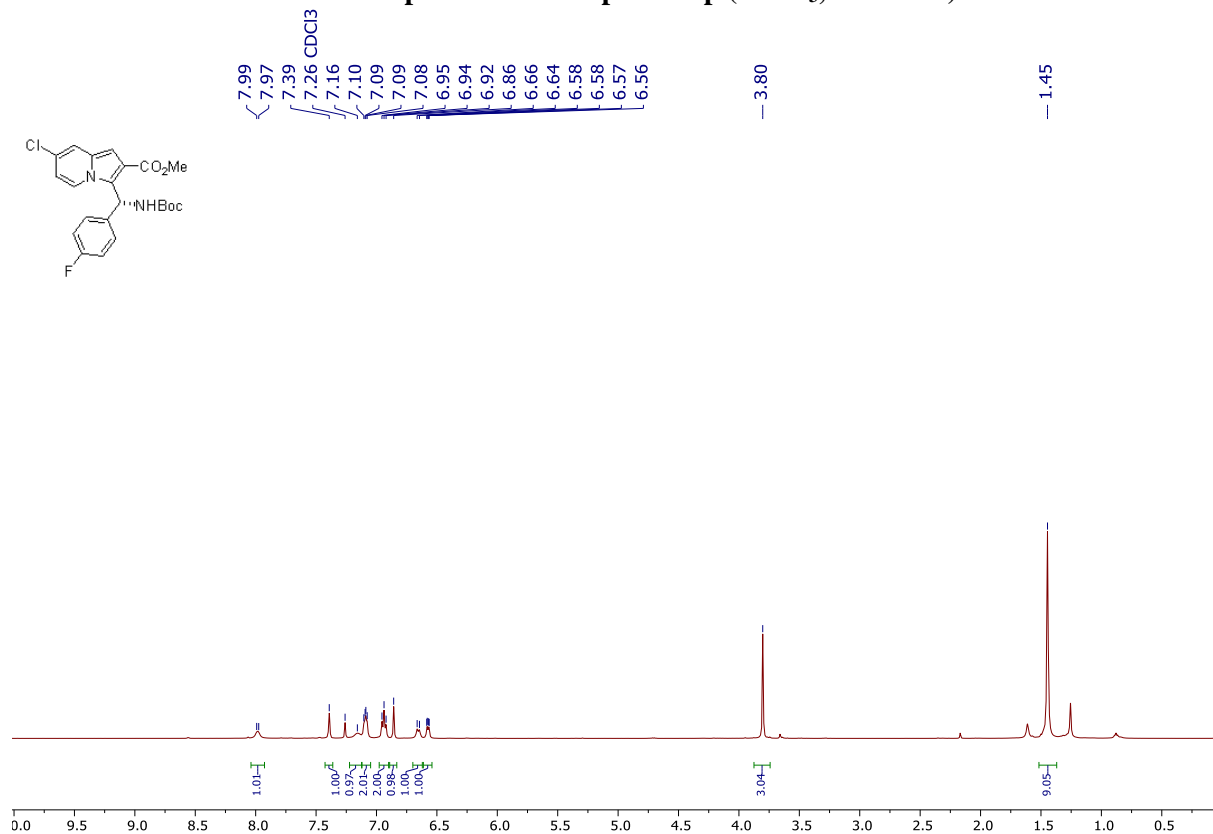

**<sup>13</sup>C NMR spectrum of compound 4p (CDCl<sub>3</sub>, 126 MHz)**

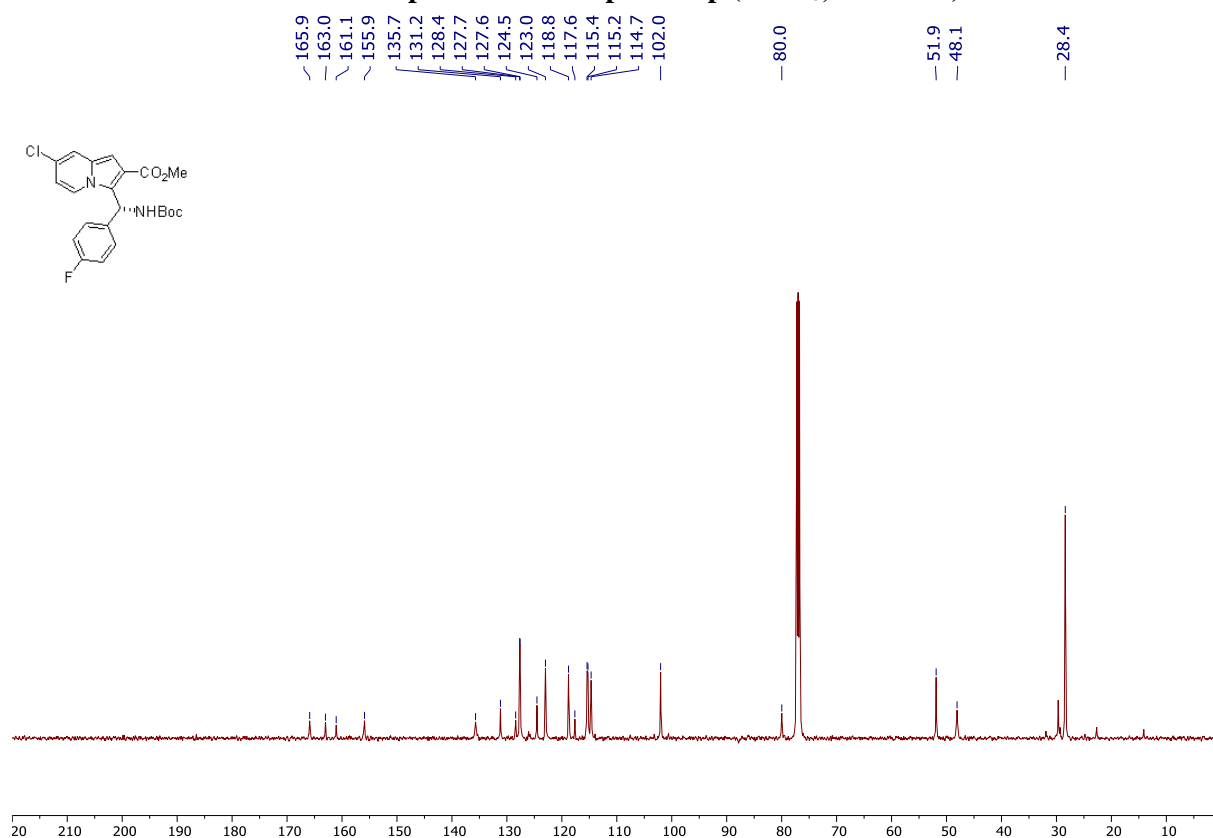

**$^{19}\text{F}$  NMR spectrum of compound 4p ( $\text{CDCl}_3$ , 470 MHz)**

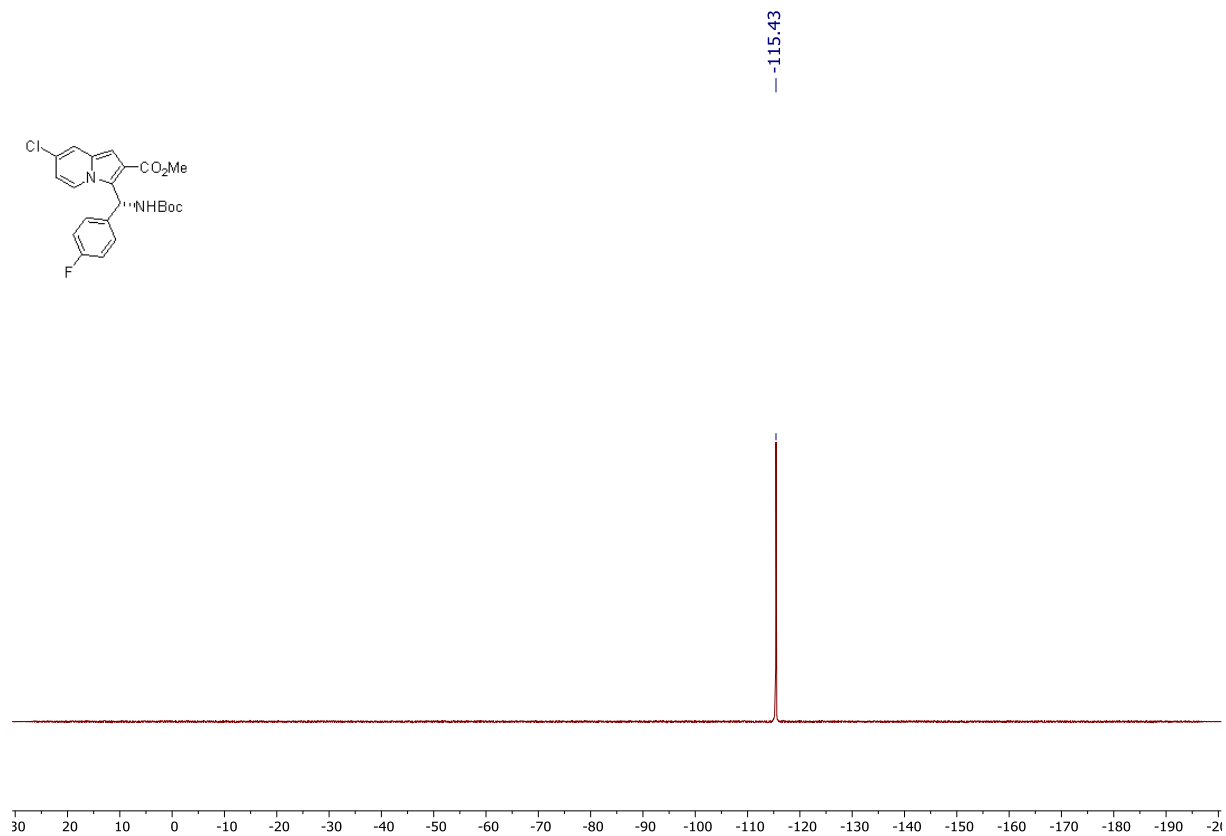



**<sup>1</sup>H NMR spectrum of compound 3p (CDCl<sub>3</sub>, 500 MHz)**

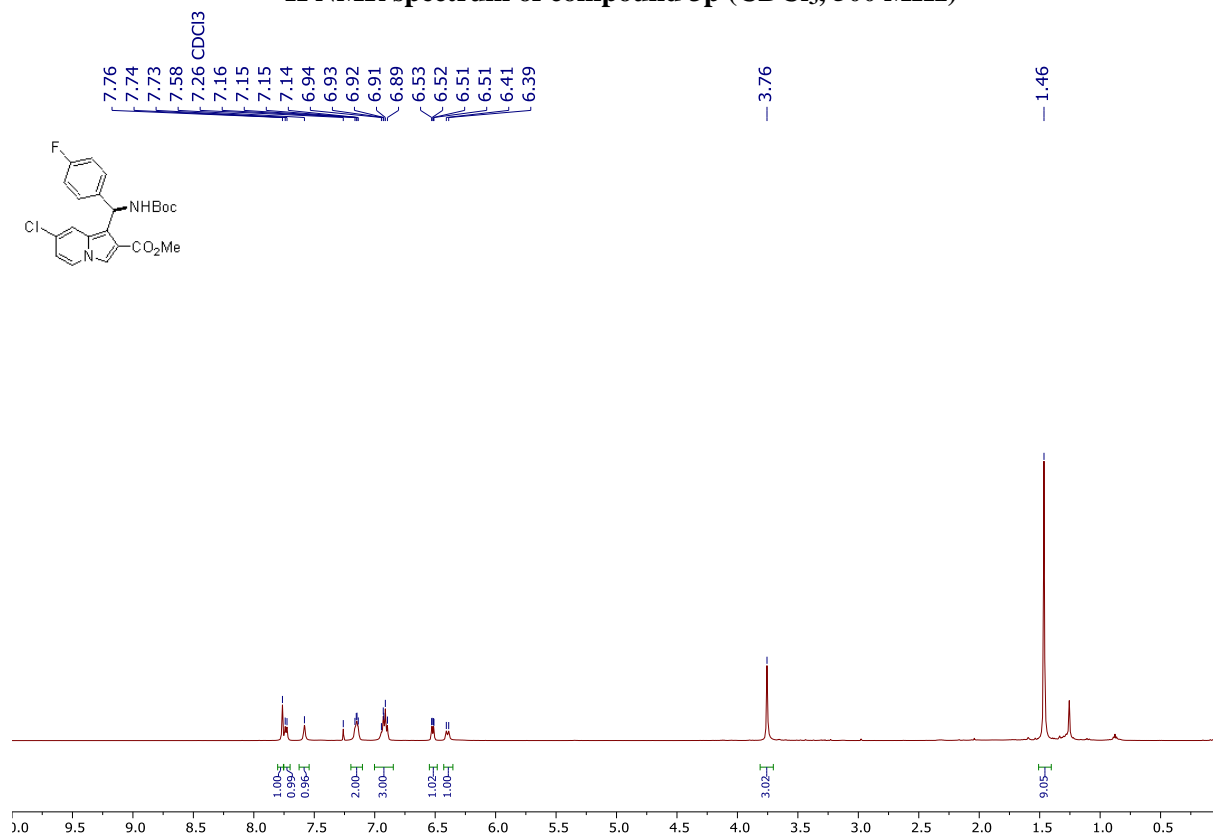

**<sup>13</sup>C NMR spectrum of compound 3p (CDCl<sub>3</sub>, 126 MHz)**

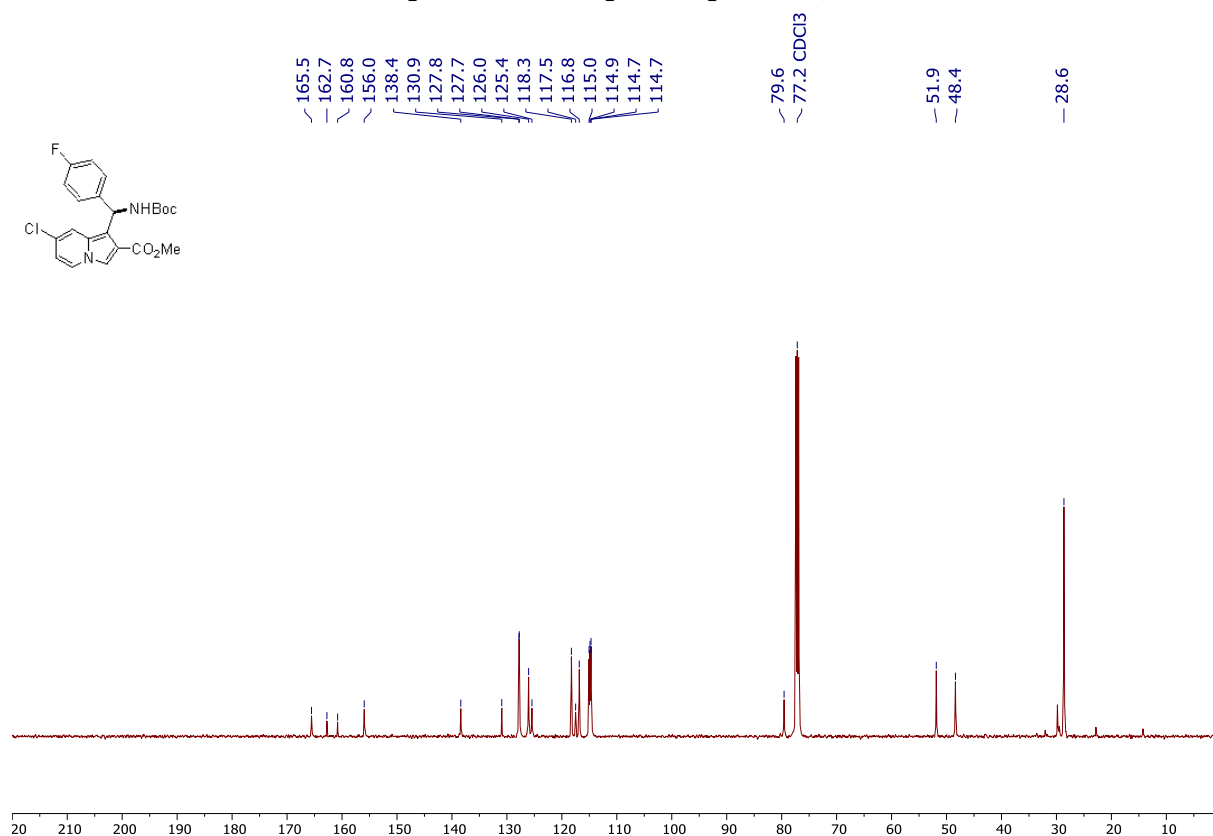

**$^{19}\text{F}$  NMR spectrum of compound 3p ( $\text{CDCl}_3$ , 470 MHz)**

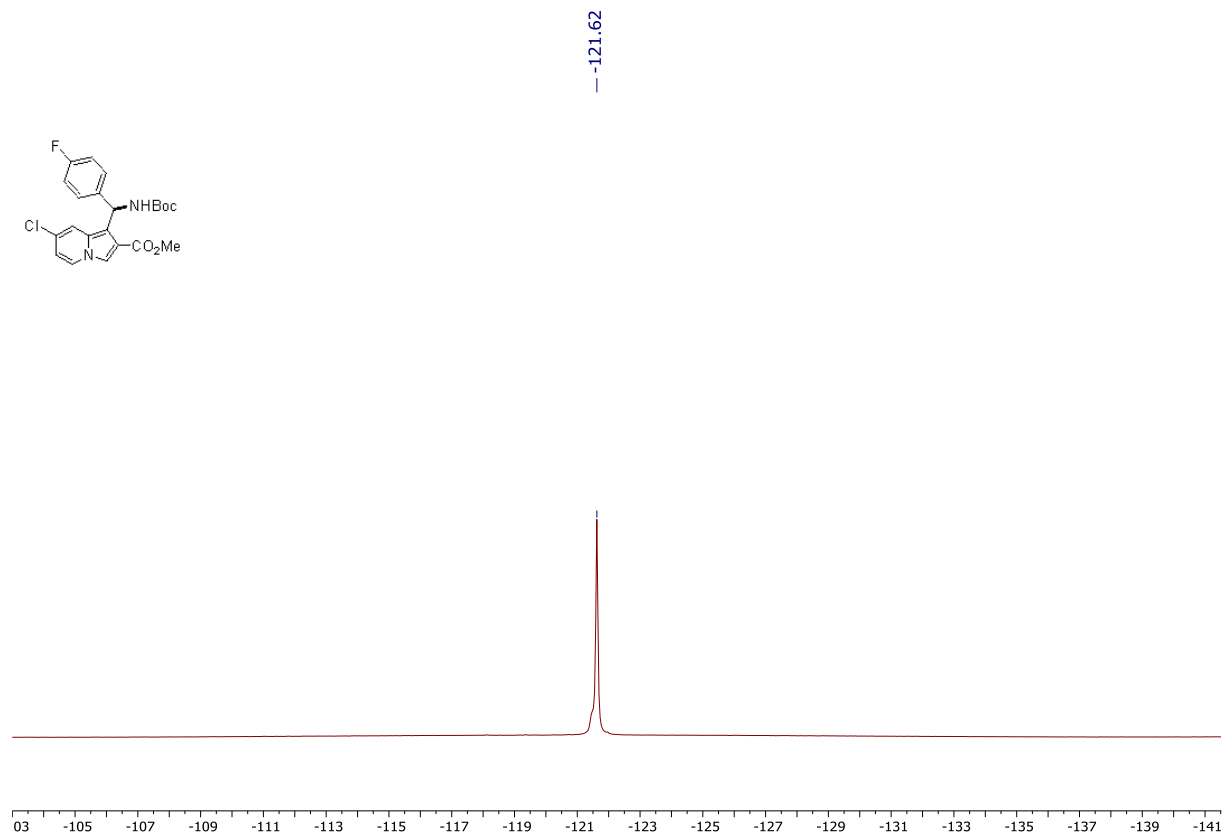

**<sup>1</sup>H NMR spectrum of compound 4q (CDCl<sub>3</sub>, 500 MHz)**

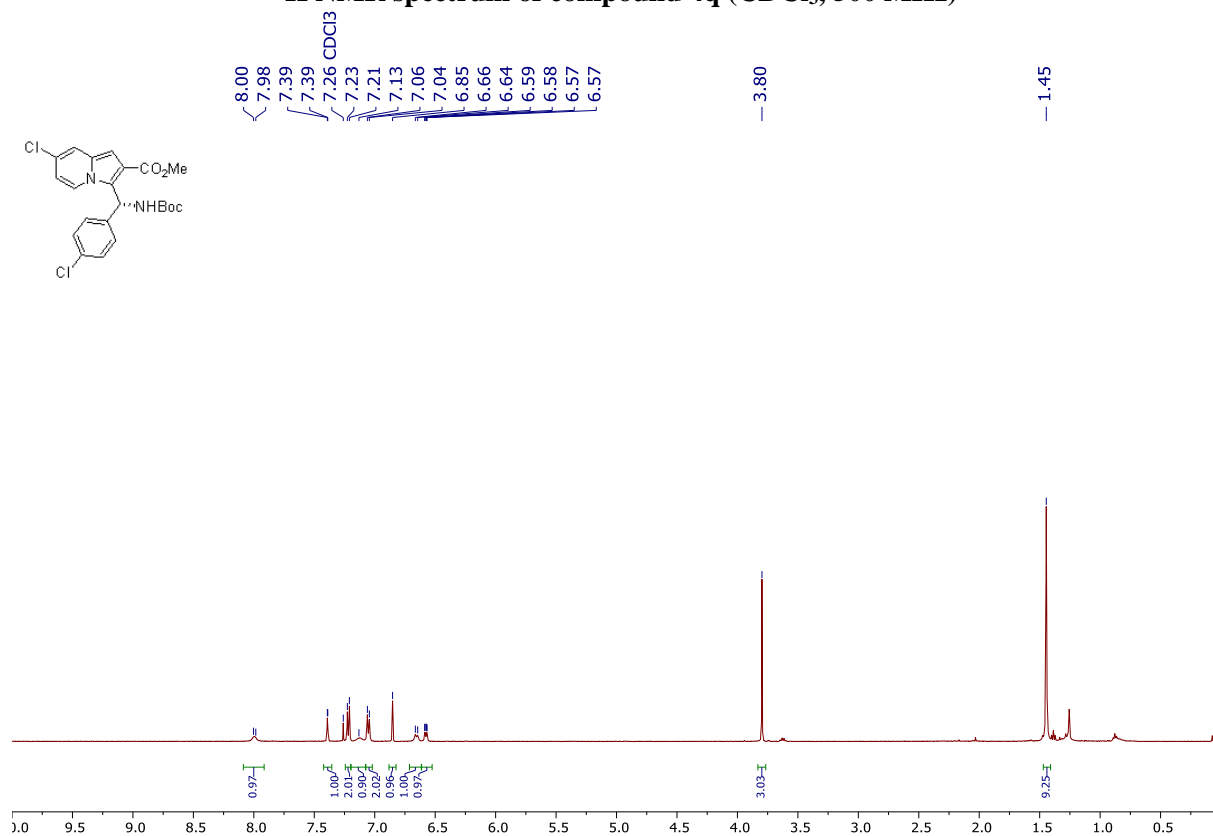

**<sup>13</sup>C NMR spectrum of compound 4q (CDCl<sub>3</sub>, 126 MHz)**

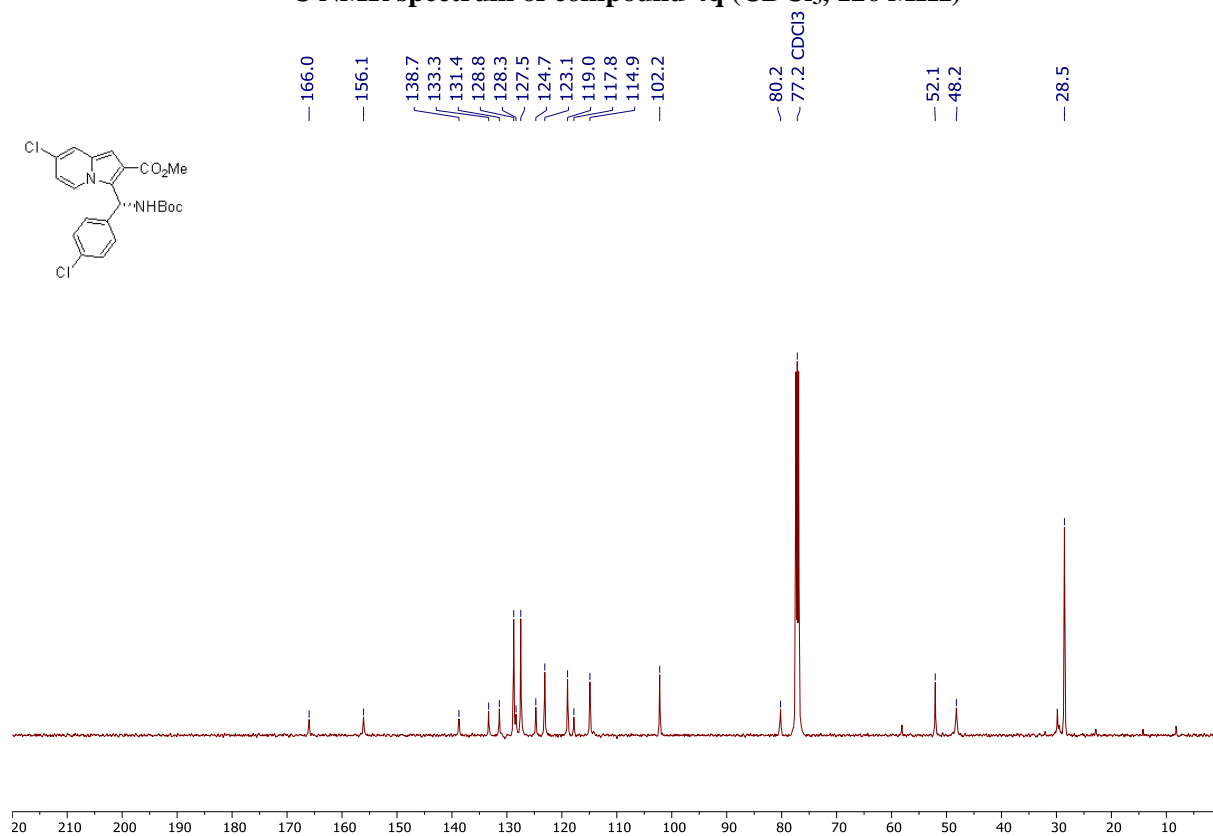

**<sup>1</sup>H NMR spectrum of compound 3q (CDCl<sub>3</sub>, 500 MHz)**

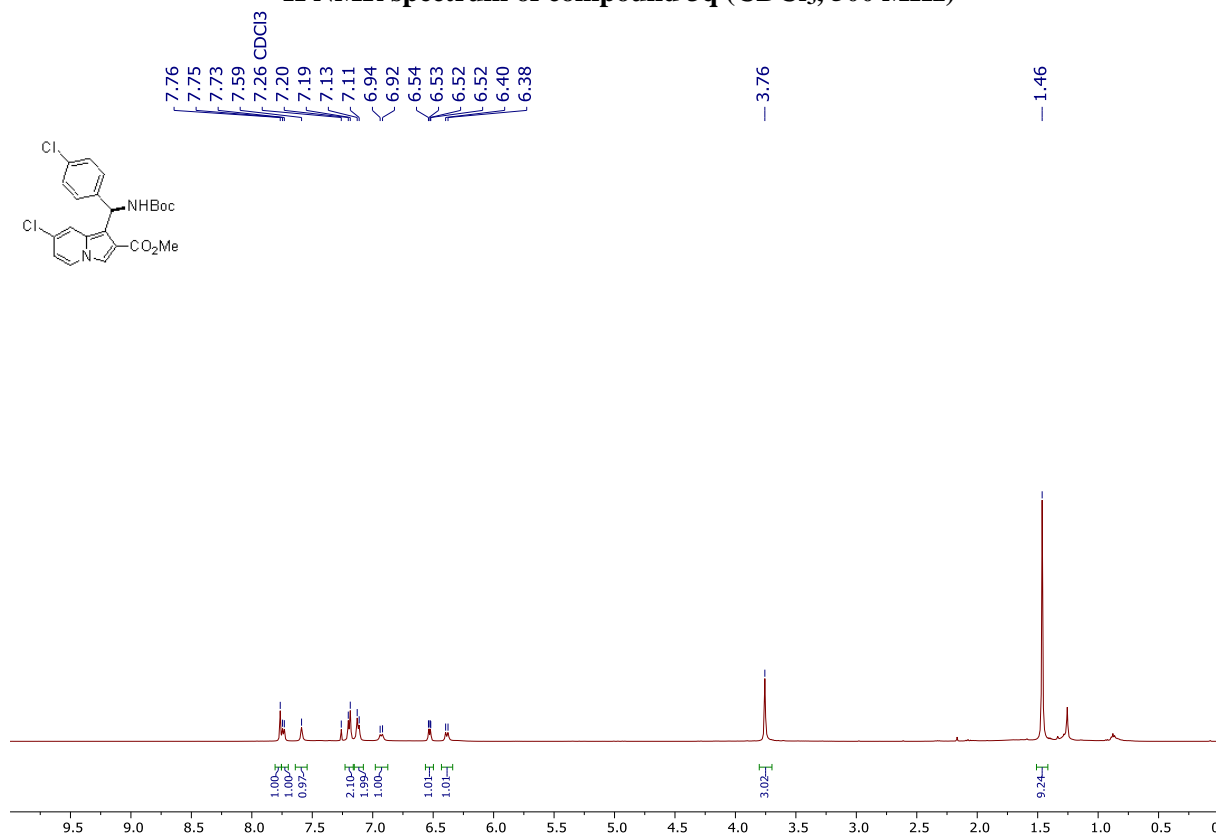

**<sup>13</sup>C NMR spectrum of compound 3q (CDCl<sub>3</sub>, 126 MHz)**

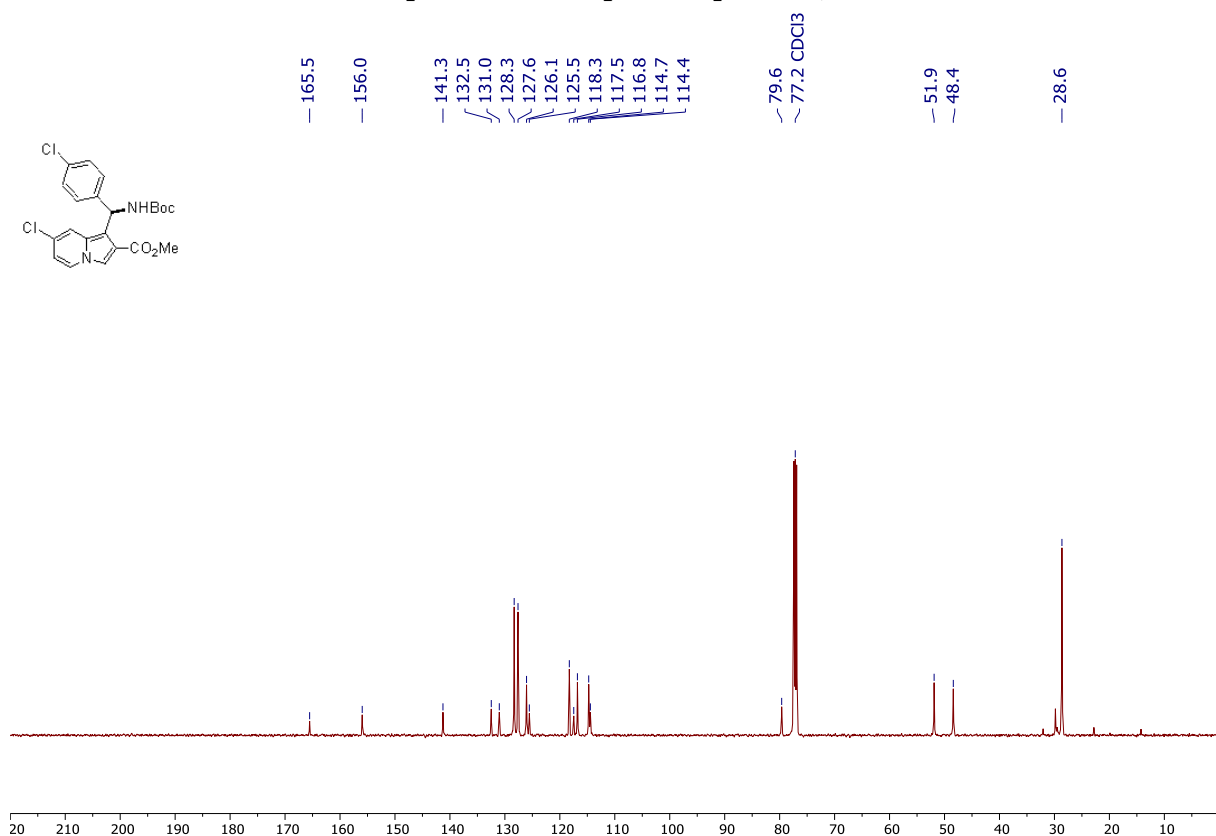

**<sup>1</sup>H NMR spectrum of compound 4r (CDCl<sub>3</sub>, 500 MHz)**

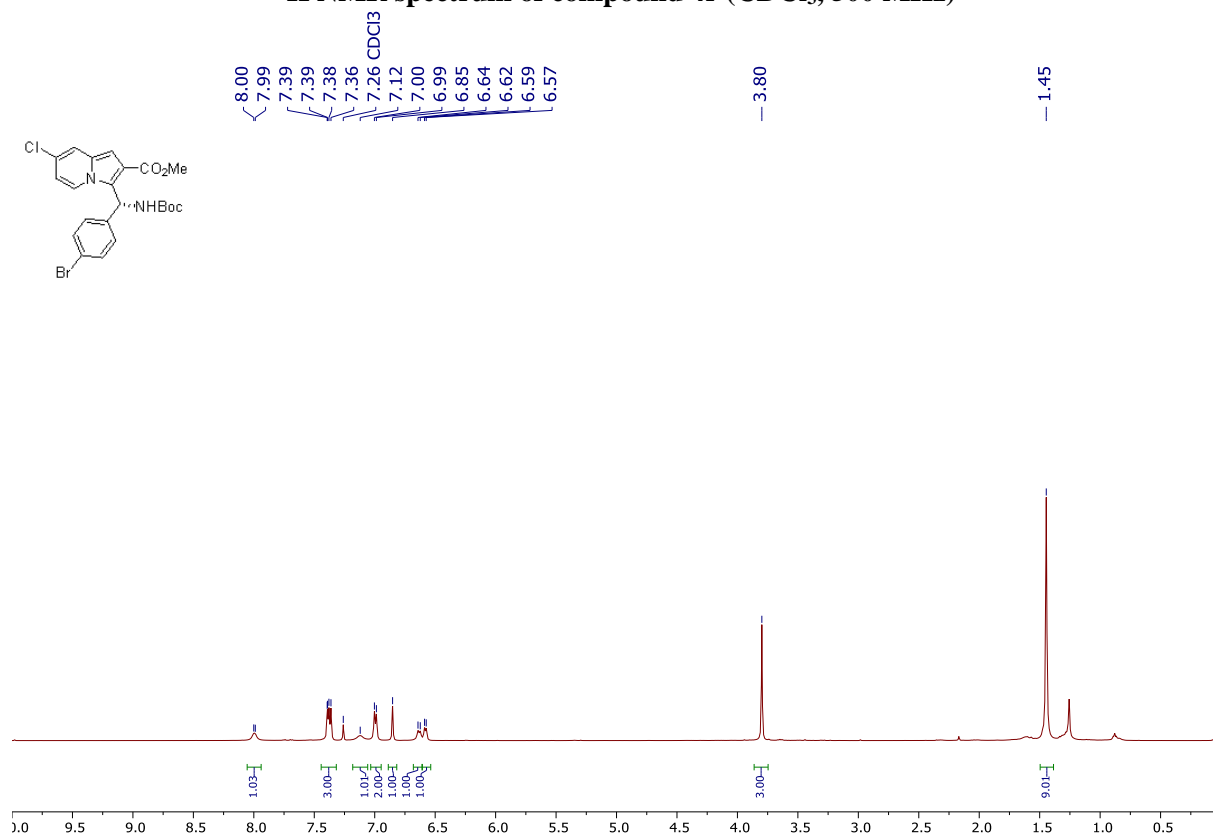

**<sup>13</sup>C NMR spectrum of compound 4r (CDCl<sub>3</sub>, 126 MHz)**

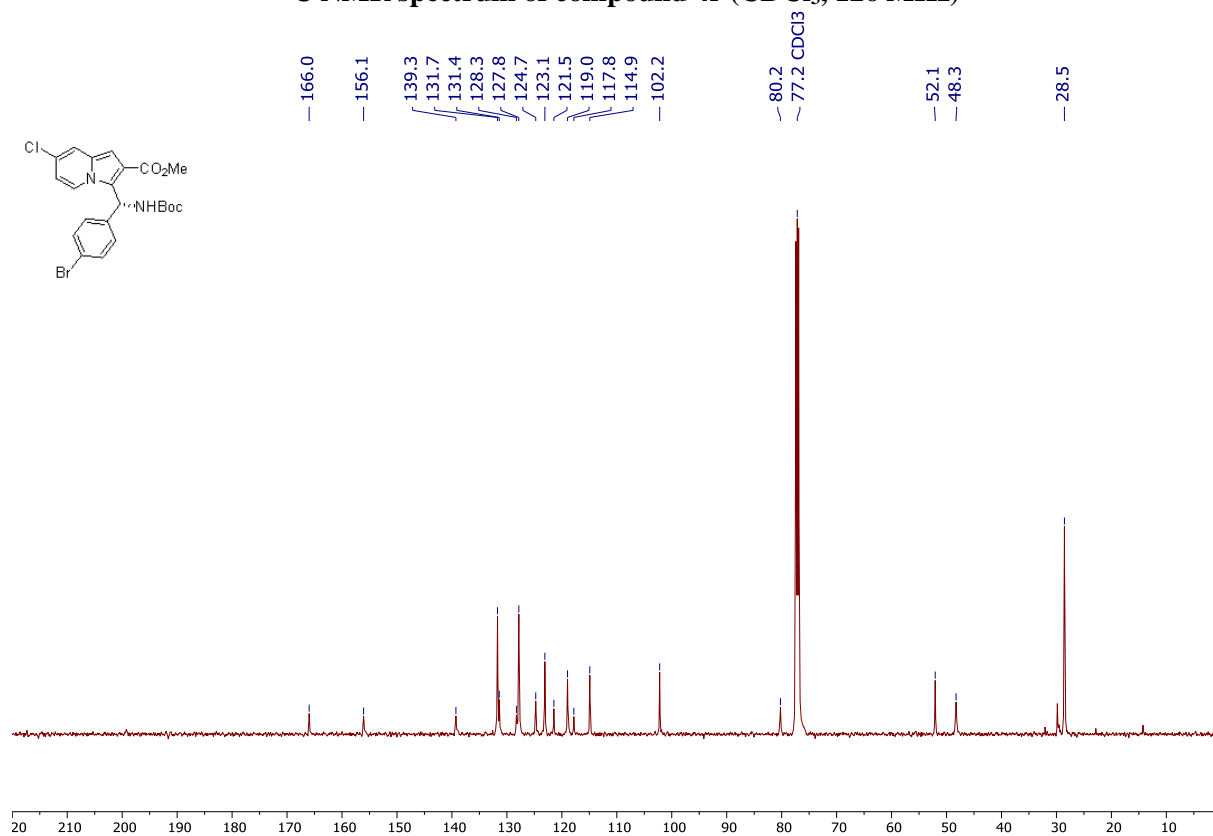

**<sup>1</sup>H NMR spectrum of compound 3r (CDCl<sub>3</sub>, 600 MHz)**

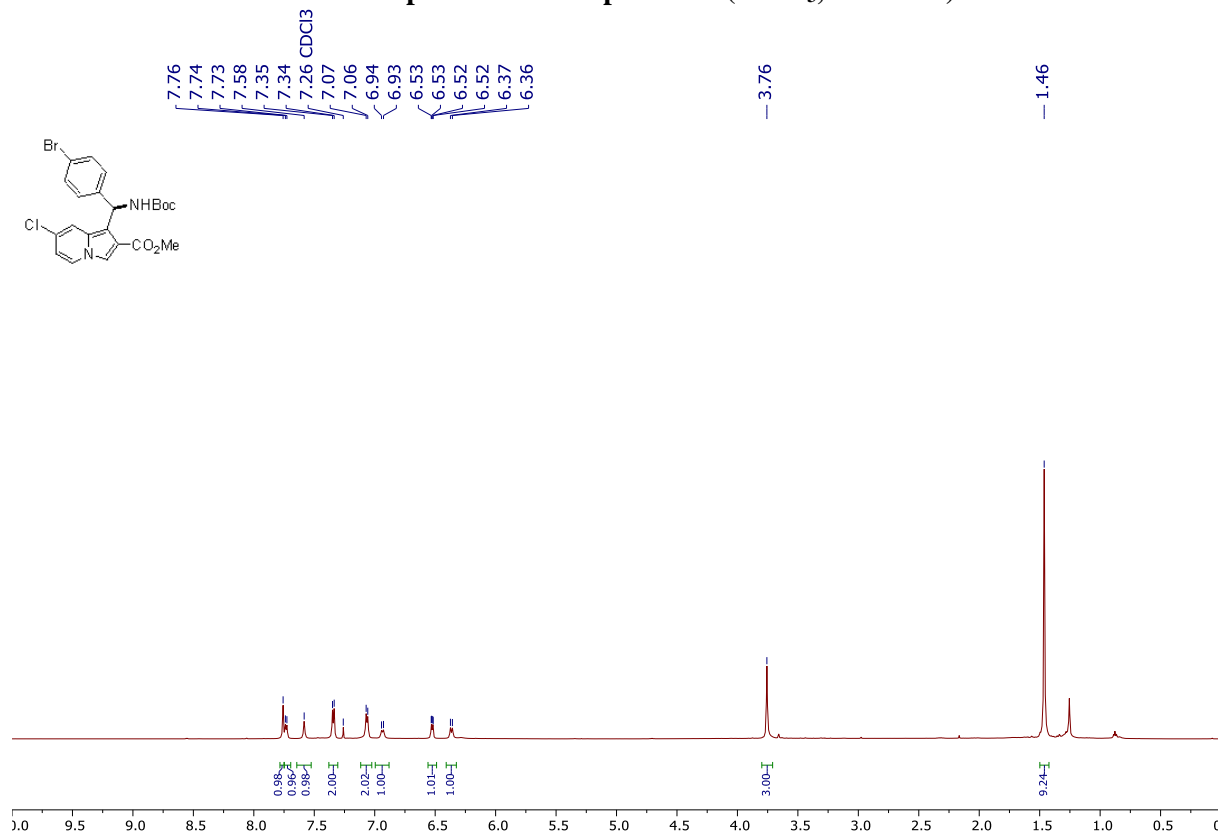

**<sup>13</sup>C NMR spectrum of compound 3r (CDCl<sub>3</sub>, 151 MHz)**

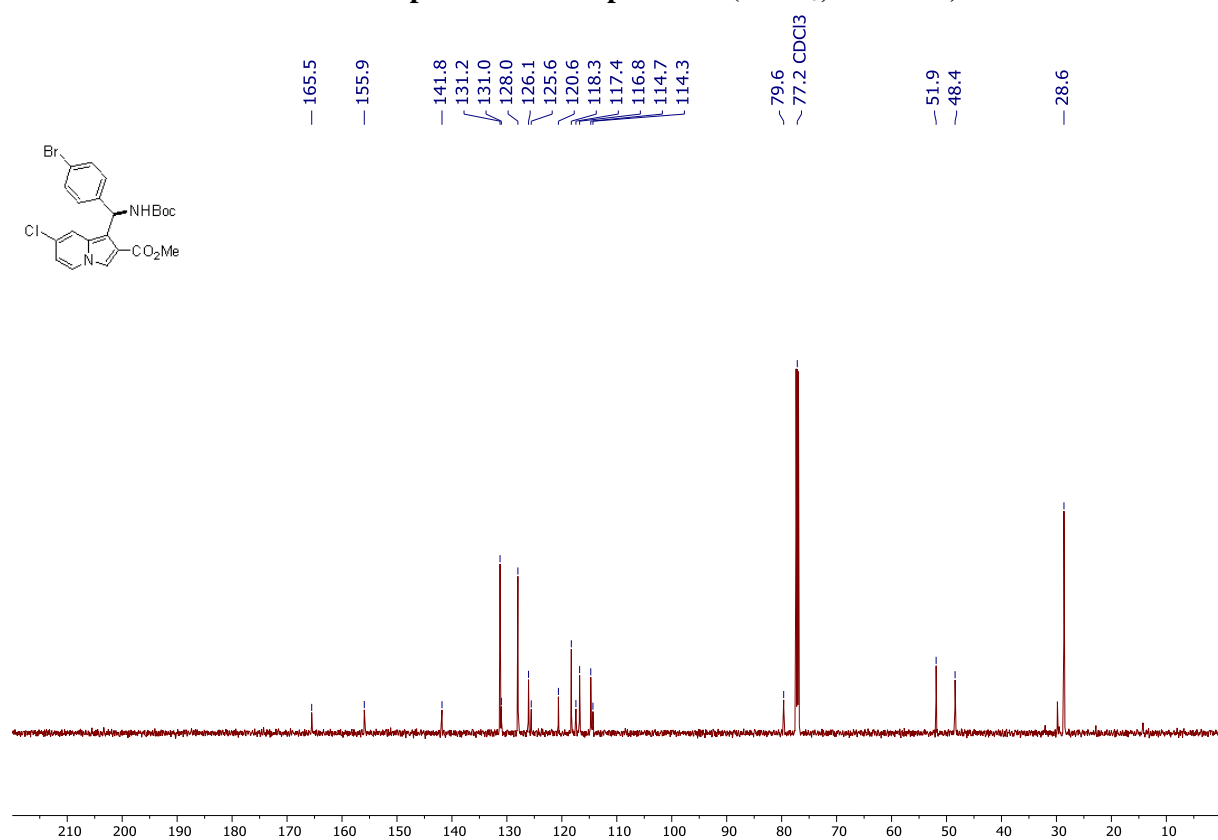

**<sup>1</sup>H NMR spectrum of compound 4s (CDCl<sub>3</sub>, 400 MHz)**

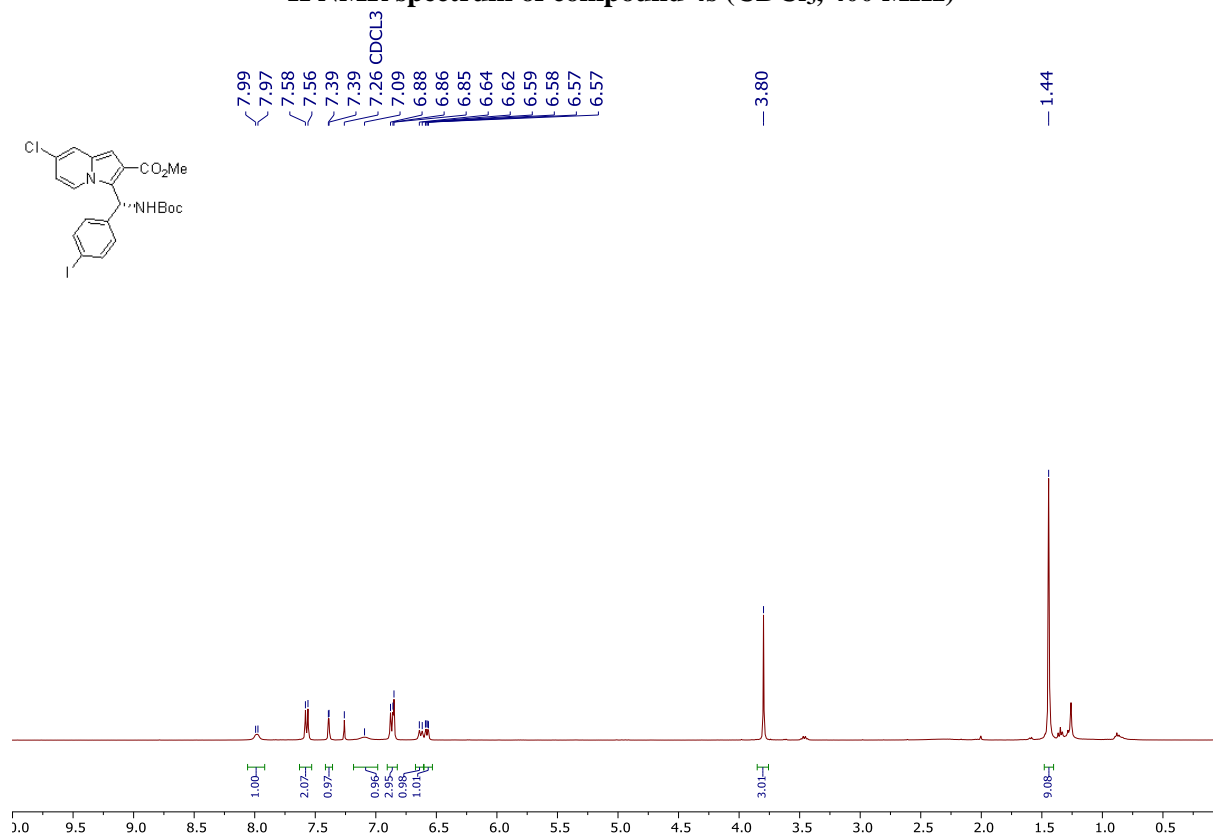

**<sup>13</sup>C NMR spectrum of compound 4s (CDCl<sub>3</sub>, 101 MHz)**

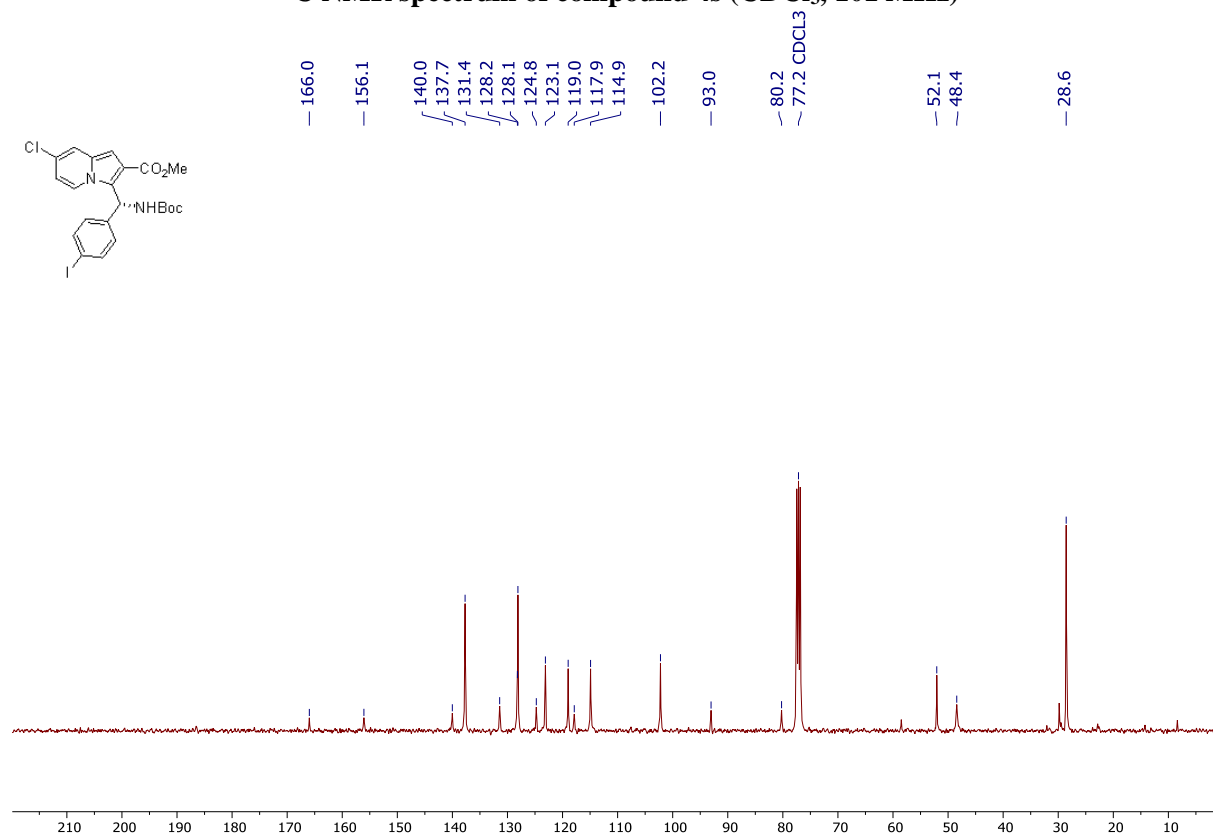

**<sup>1</sup>H NMR spectrum of compound 3s (CDCl<sub>3</sub>, 500 MHz)**

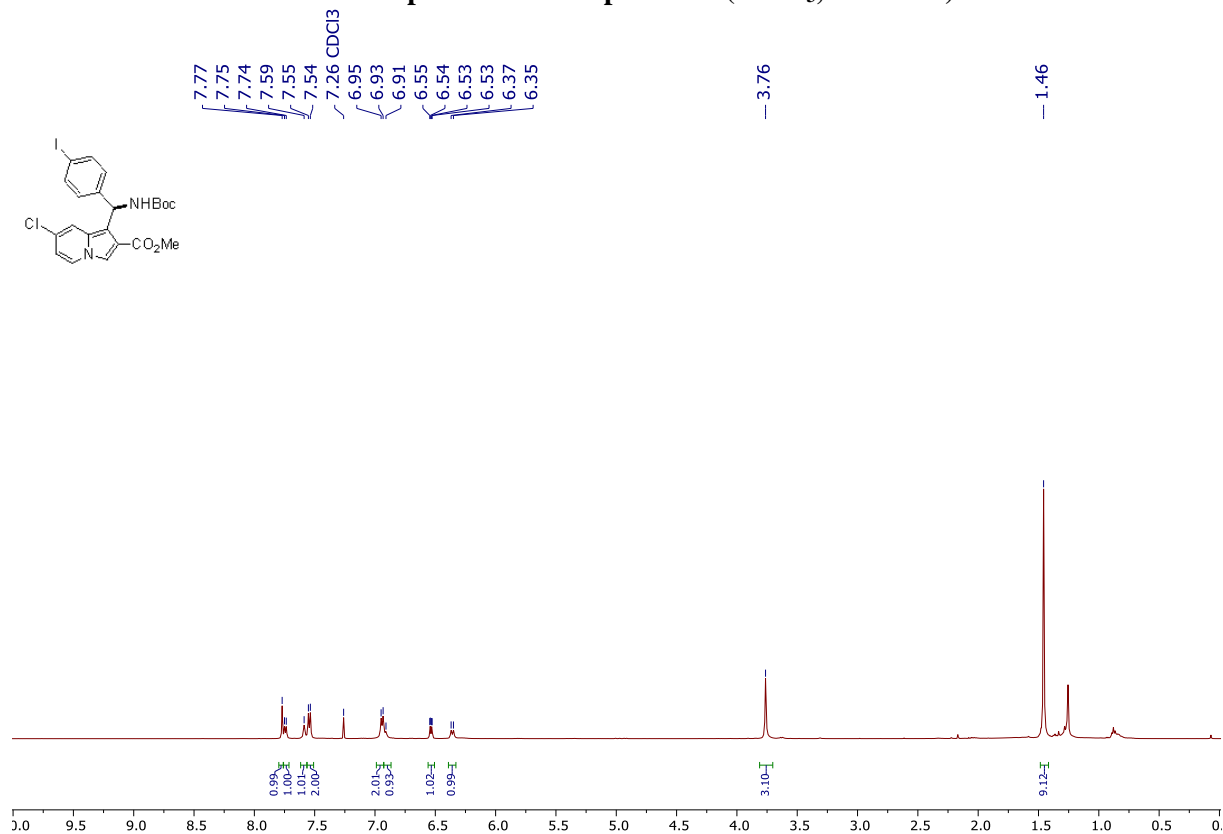

**<sup>13</sup>C NMR spectrum of compound 3s (CDCl<sub>3</sub>, 126 MHz)**

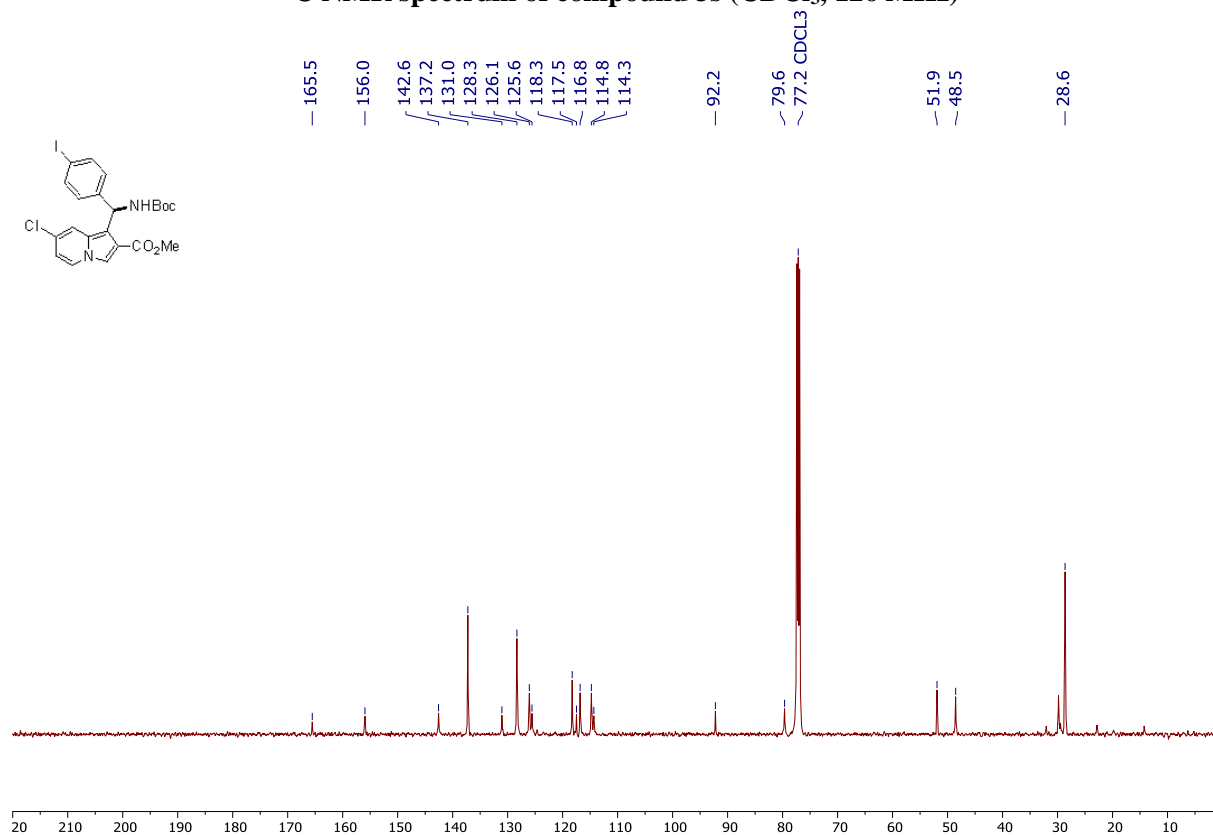



**<sup>1</sup>H NMR spectrum of compound 10 (CDCl<sub>3</sub>, 500 MHz)**

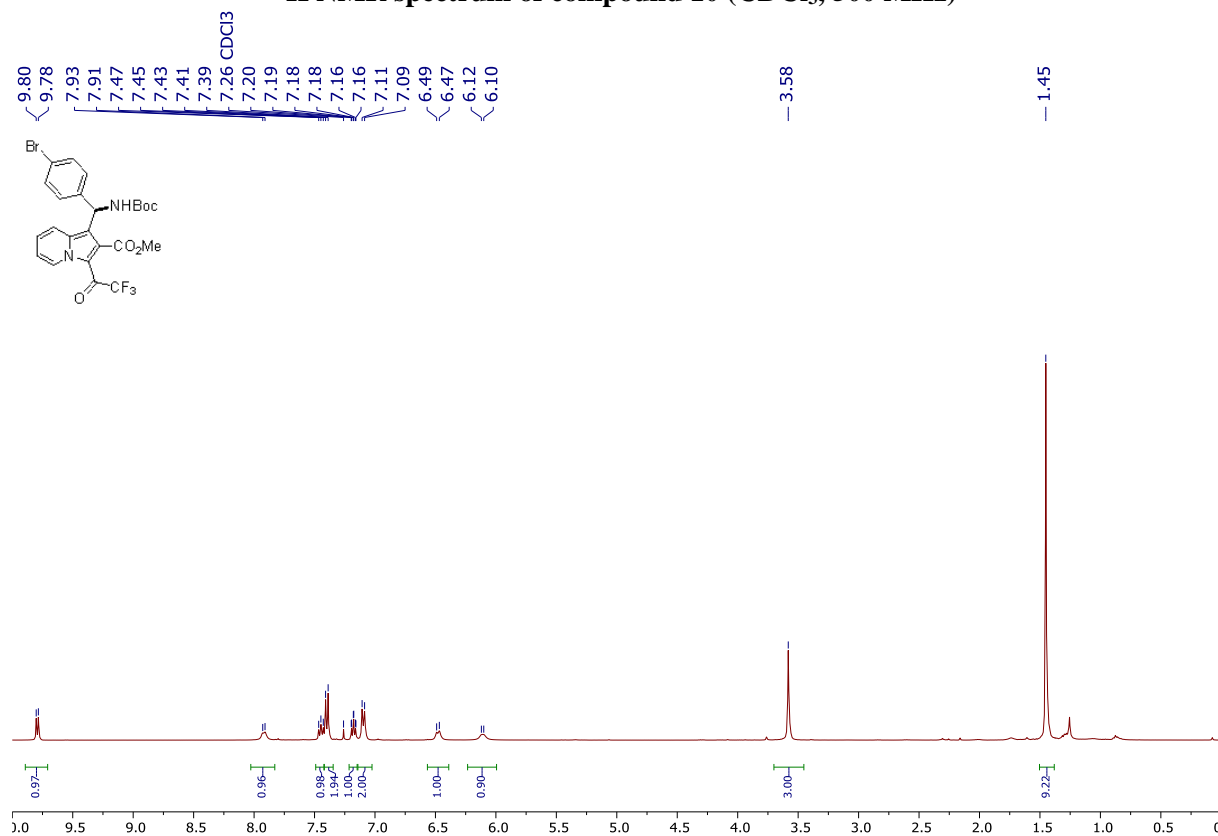

**<sup>13</sup>C NMR spectrum of compound 10 (CDCl<sub>3</sub>, 101 MHz)**

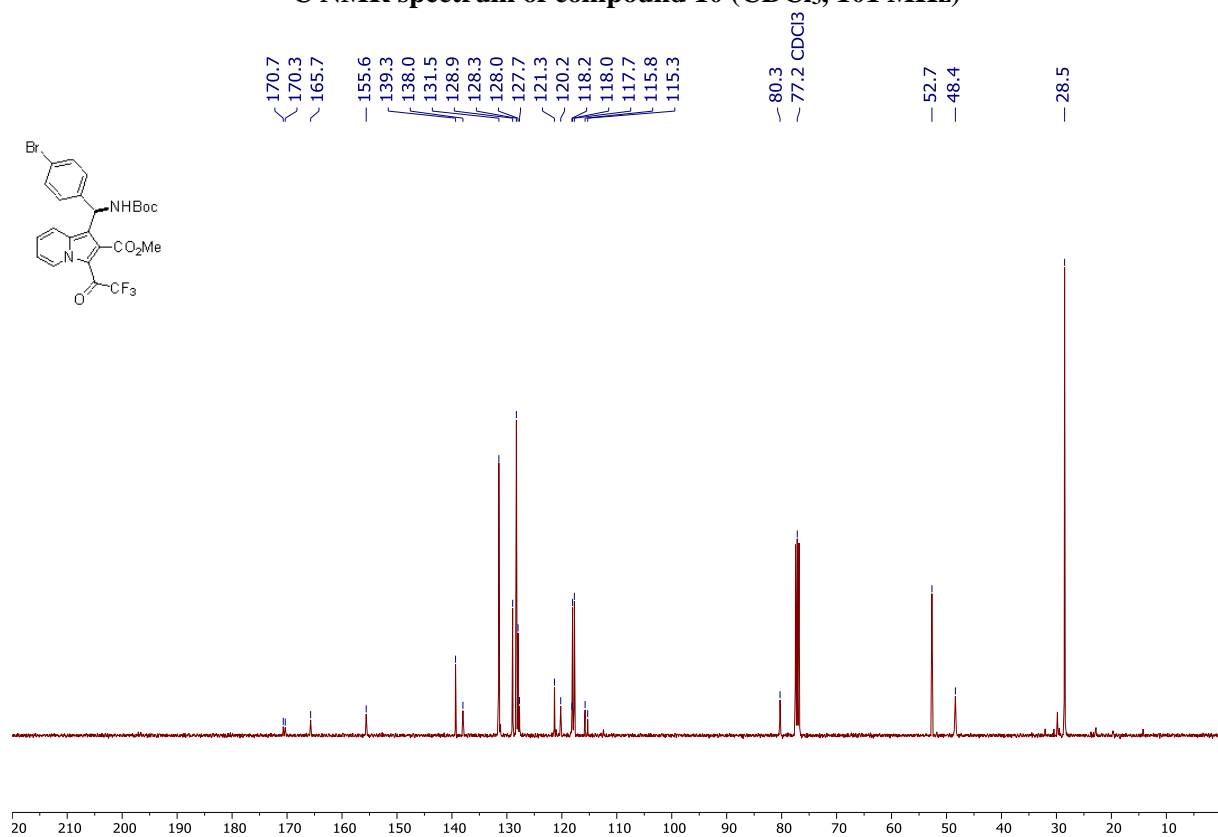

**$^{19}\text{F}$  NMR spectrum of compound 10 ( $\text{CDCl}_3$ , 376 MHz)**

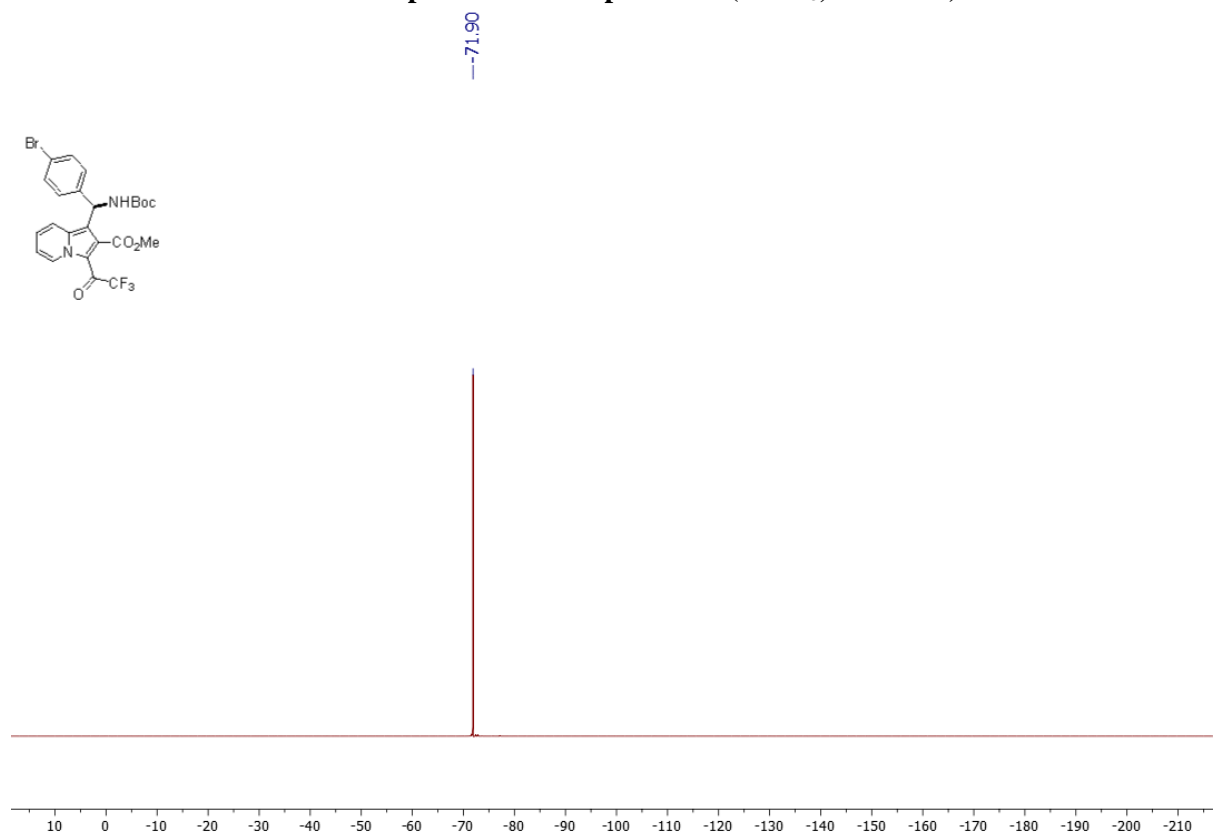

## 6.2. Products with Cbz-protecting group 6a-m, 7a-m, 8 and 9

<sup>1</sup>H NMR spectrum of compound 6a (CDCl<sub>3</sub>, 400 MHz)

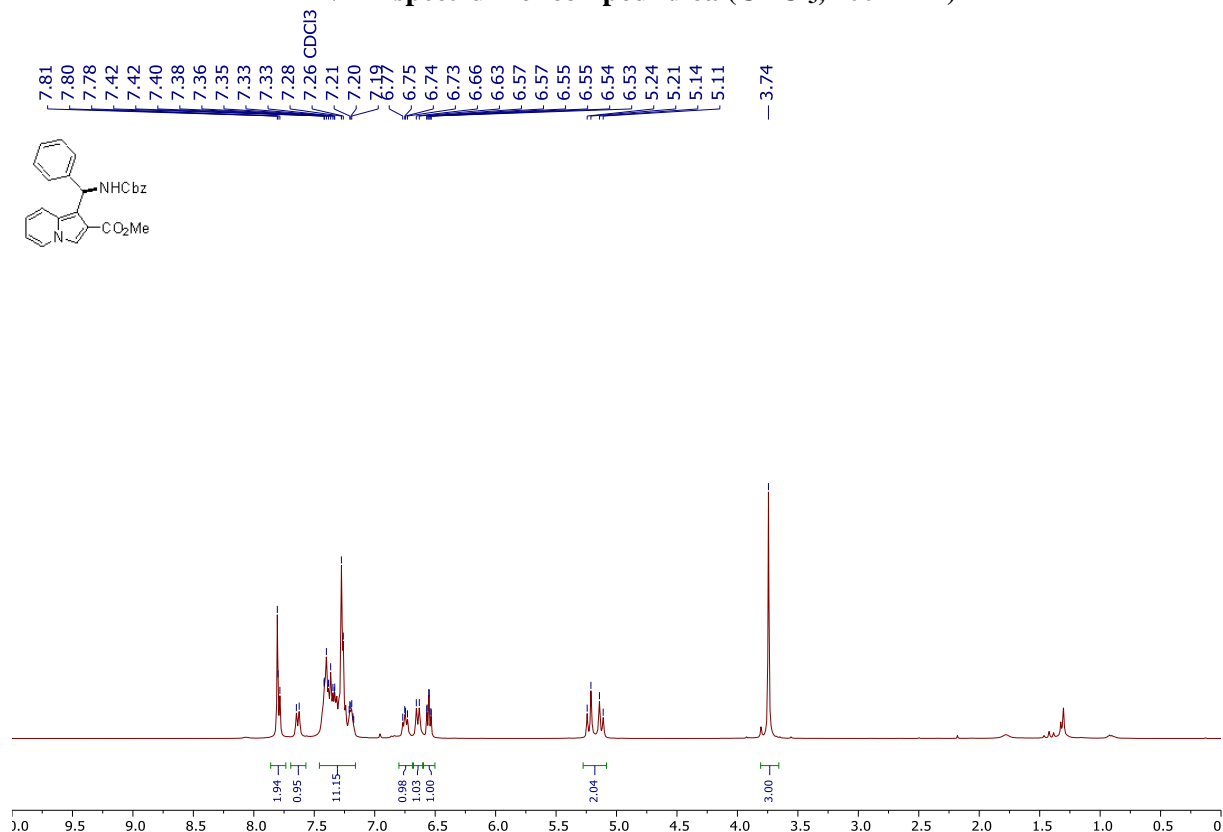

<sup>13</sup>C NMR spectrum of compound 6a (CDCl<sub>3</sub>, 101 MHz)

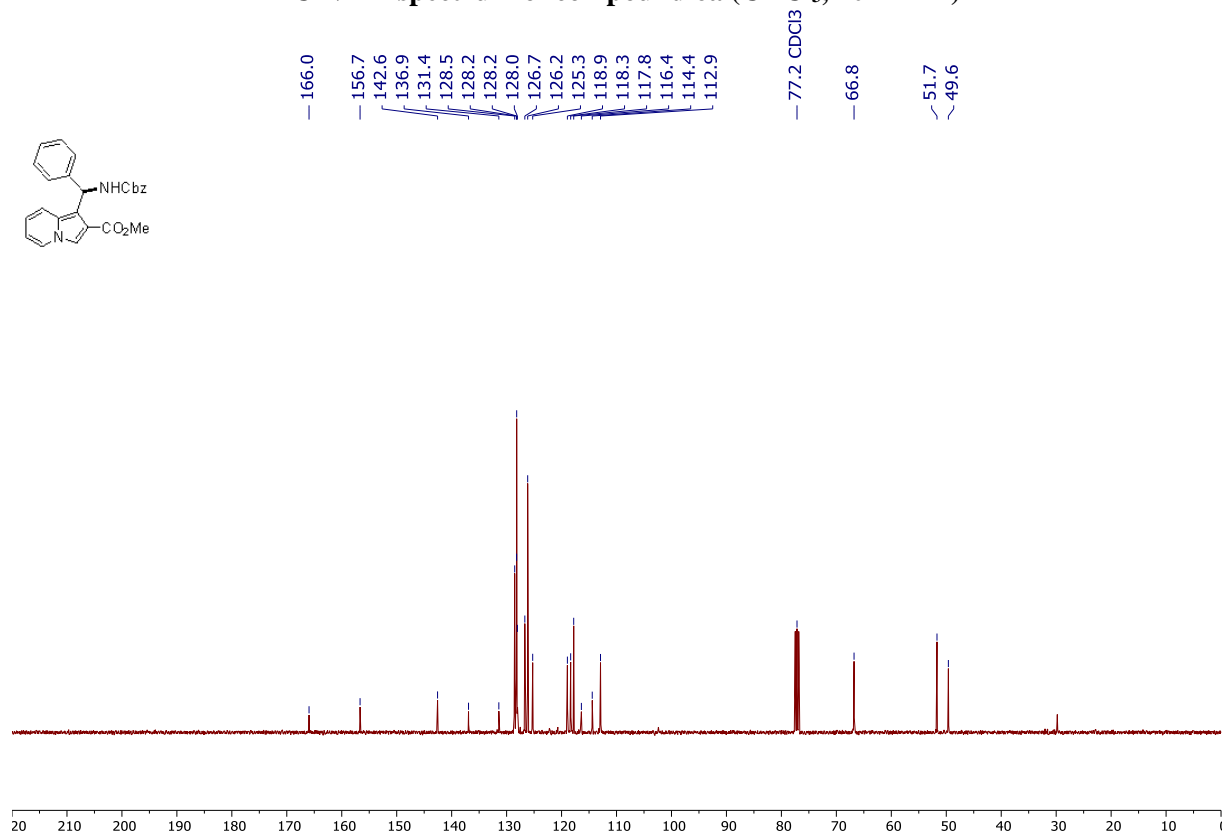

**<sup>1</sup>H NMR spectrum of compound 7a (CD<sub>2</sub>Cl<sub>2</sub>, 400 MHz)**

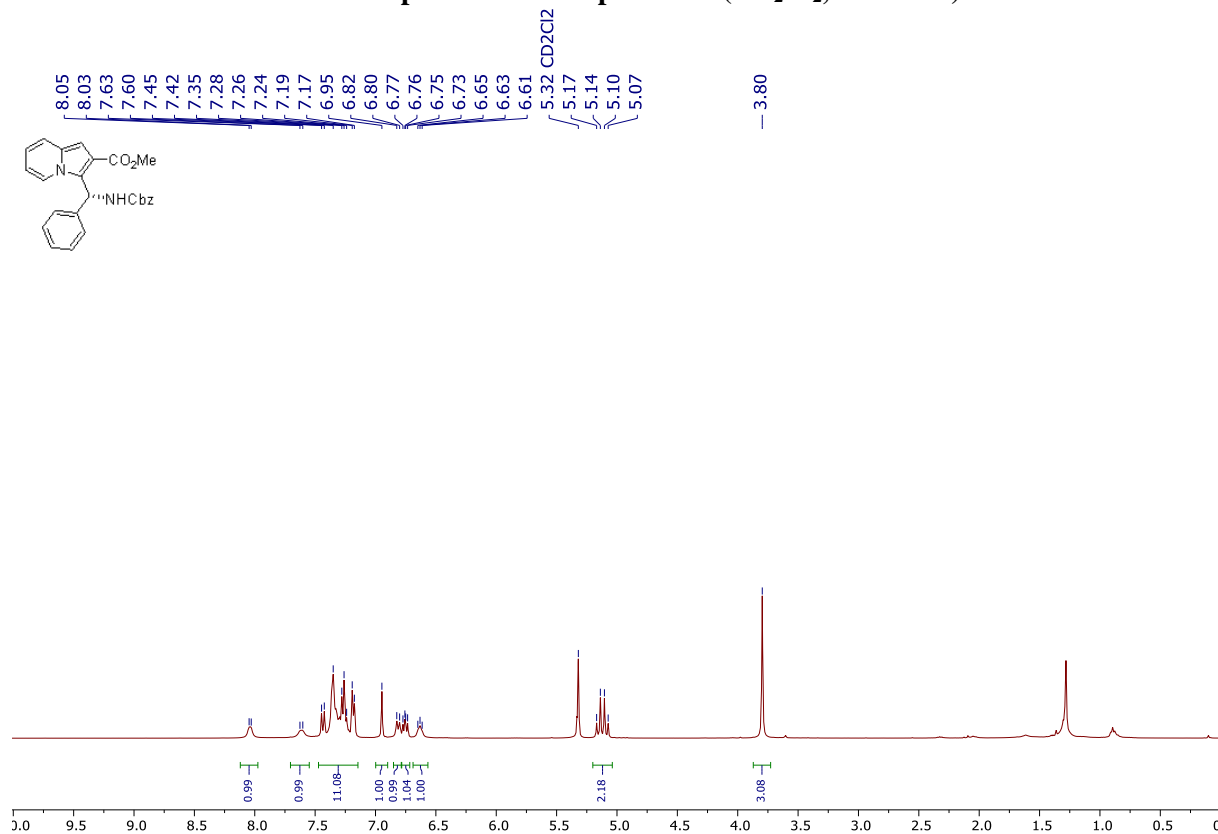

**<sup>13</sup>C NMR spectrum of compound 7a (CD<sub>2</sub>Cl<sub>2</sub>, 101 MHz)**

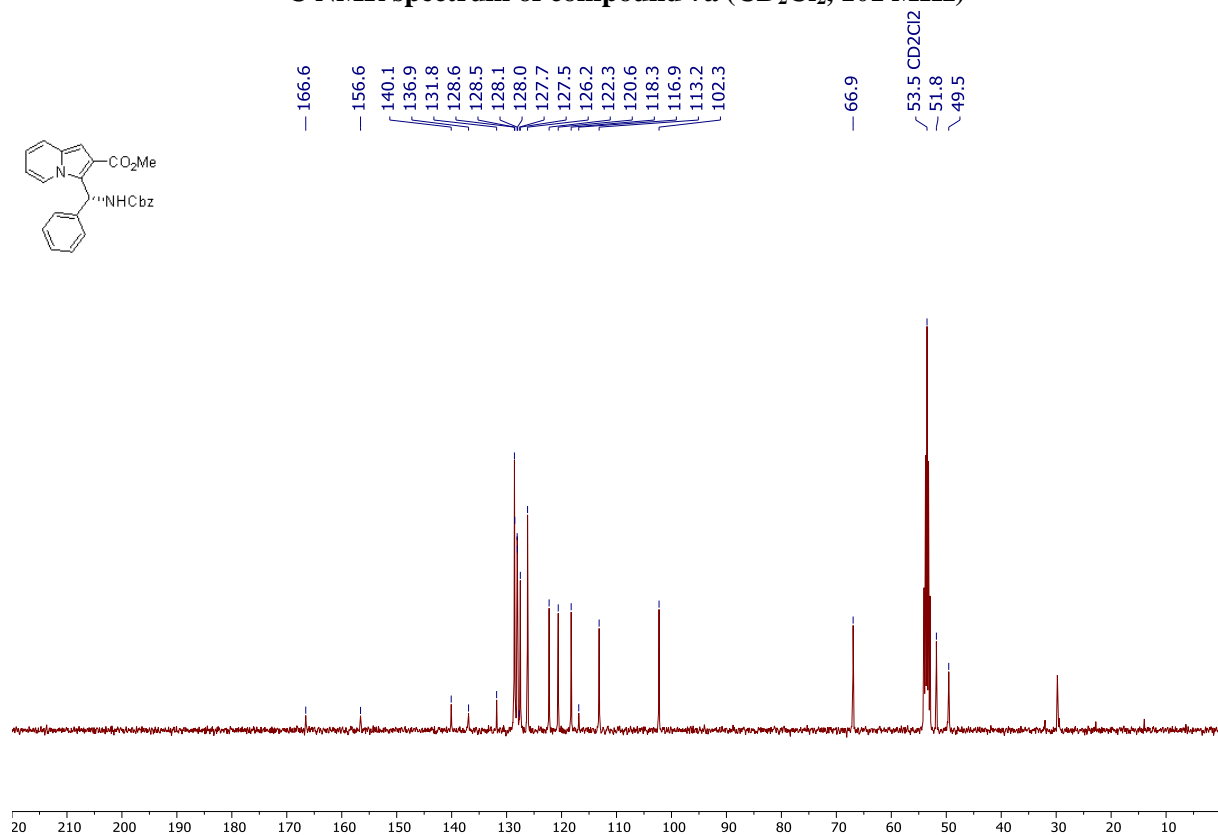

**<sup>1</sup>H NMR spectrum of compound 6m (CDCl<sub>3</sub>, 400 MHz)**

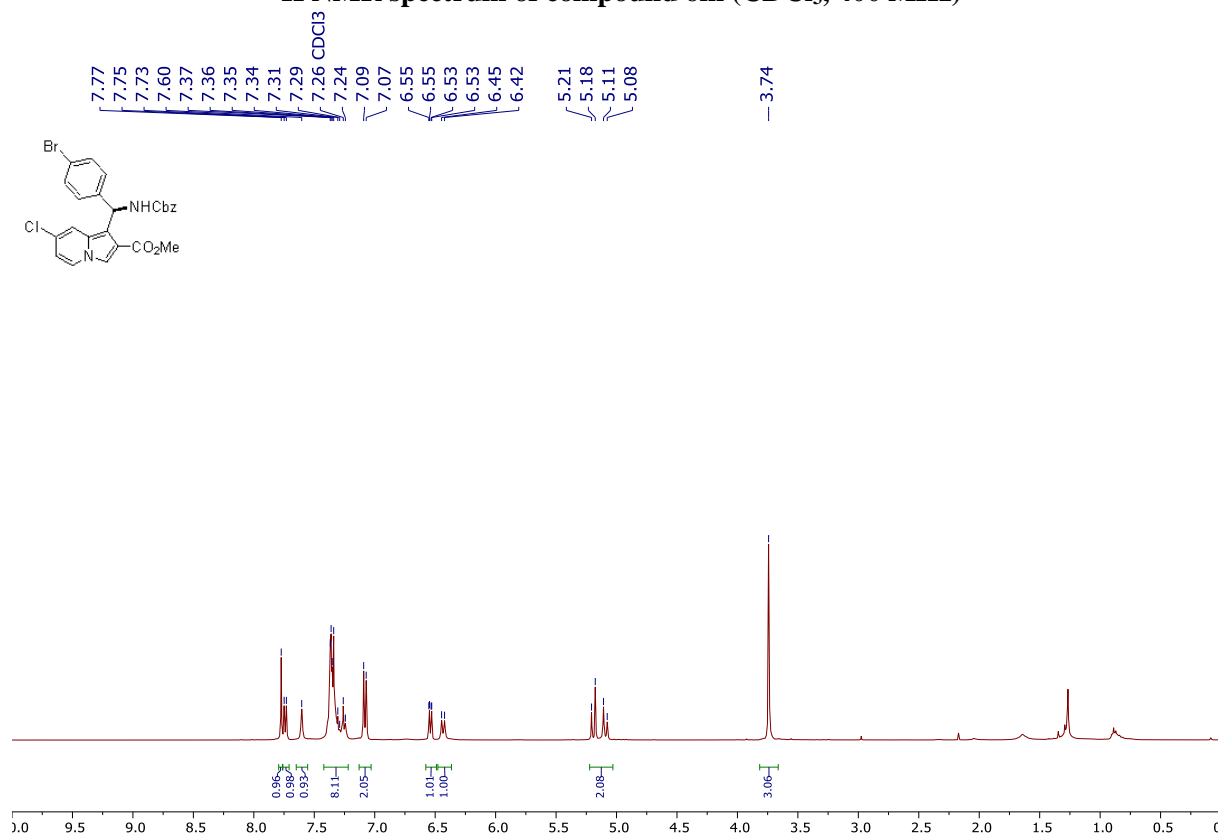

**<sup>13</sup>C NMR spectrum of compound 6m (CDCl<sub>3</sub>, 101 MHz)**

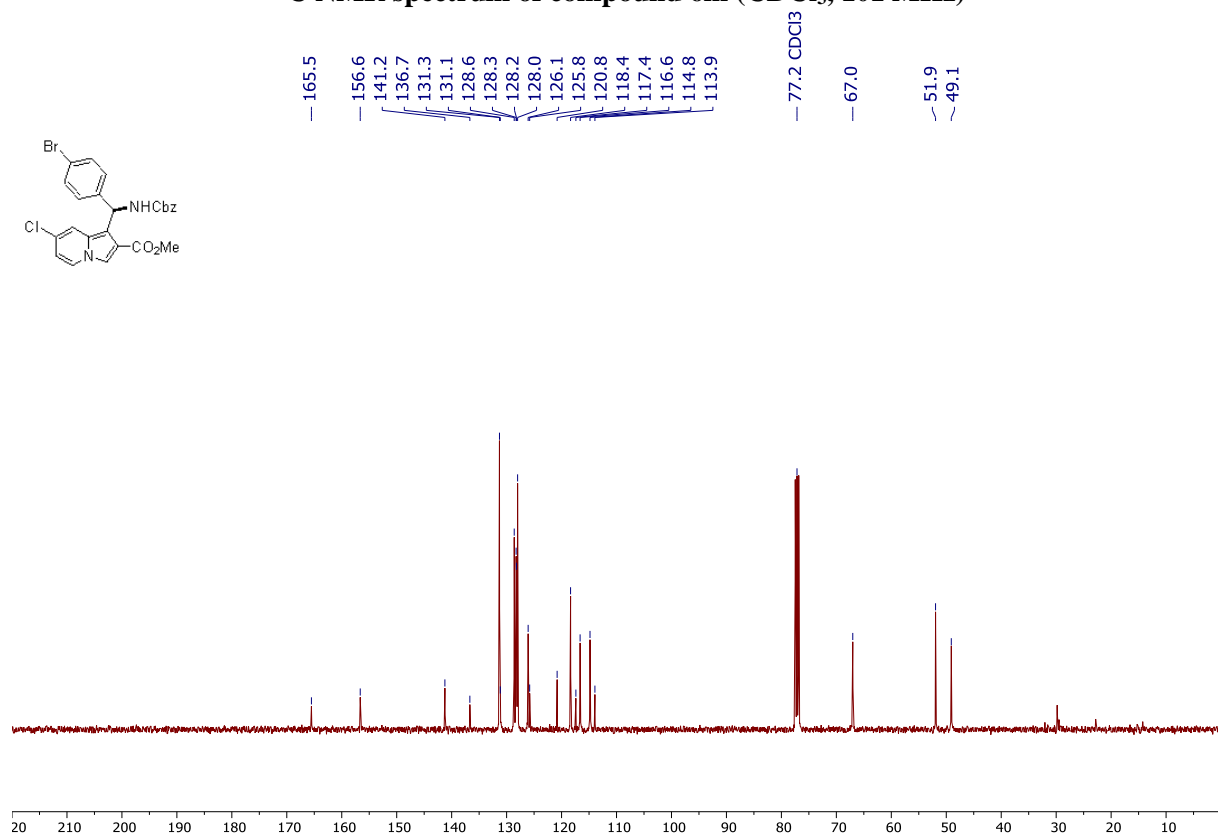

**<sup>1</sup>H NMR spectrum of compound 7b (CDCl<sub>3</sub>, 400 MHz)**

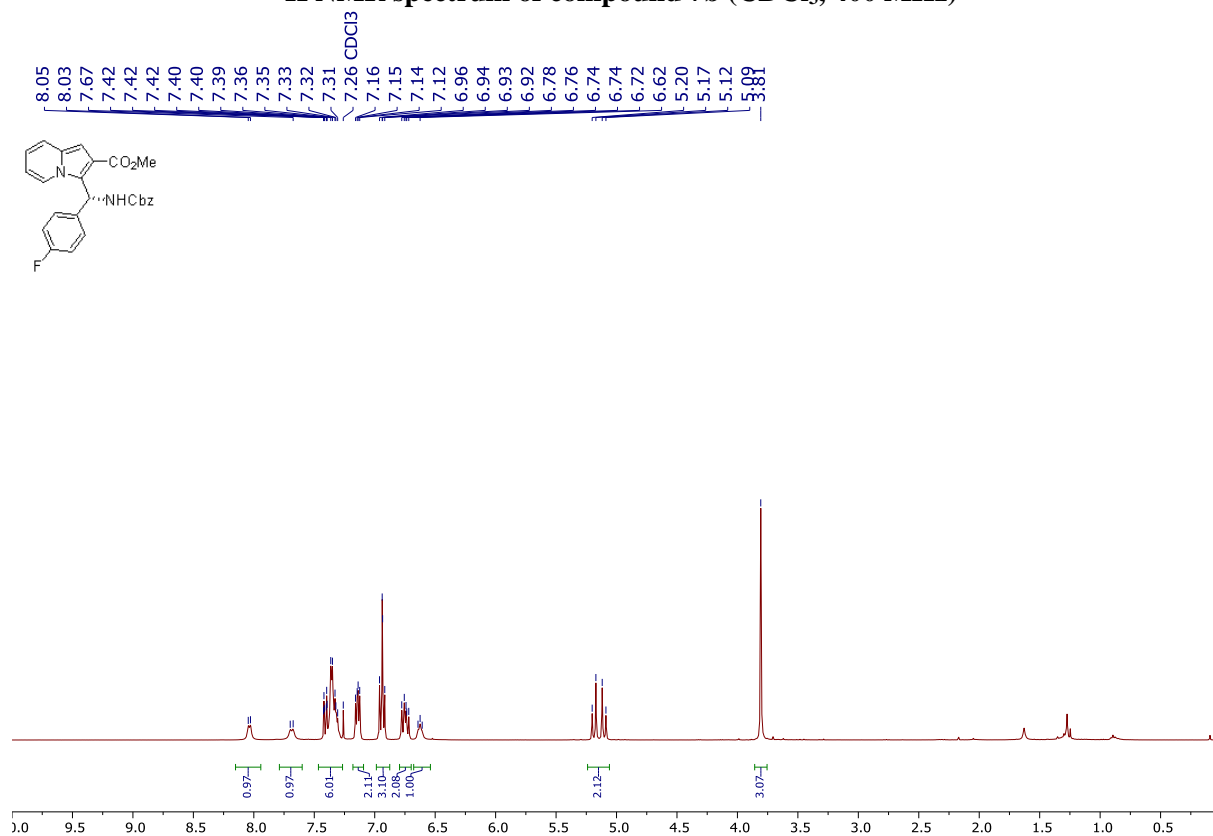

**<sup>13</sup>C NMR spectrum of compound 7b (CDCl<sub>3</sub>, 101 MHz)**

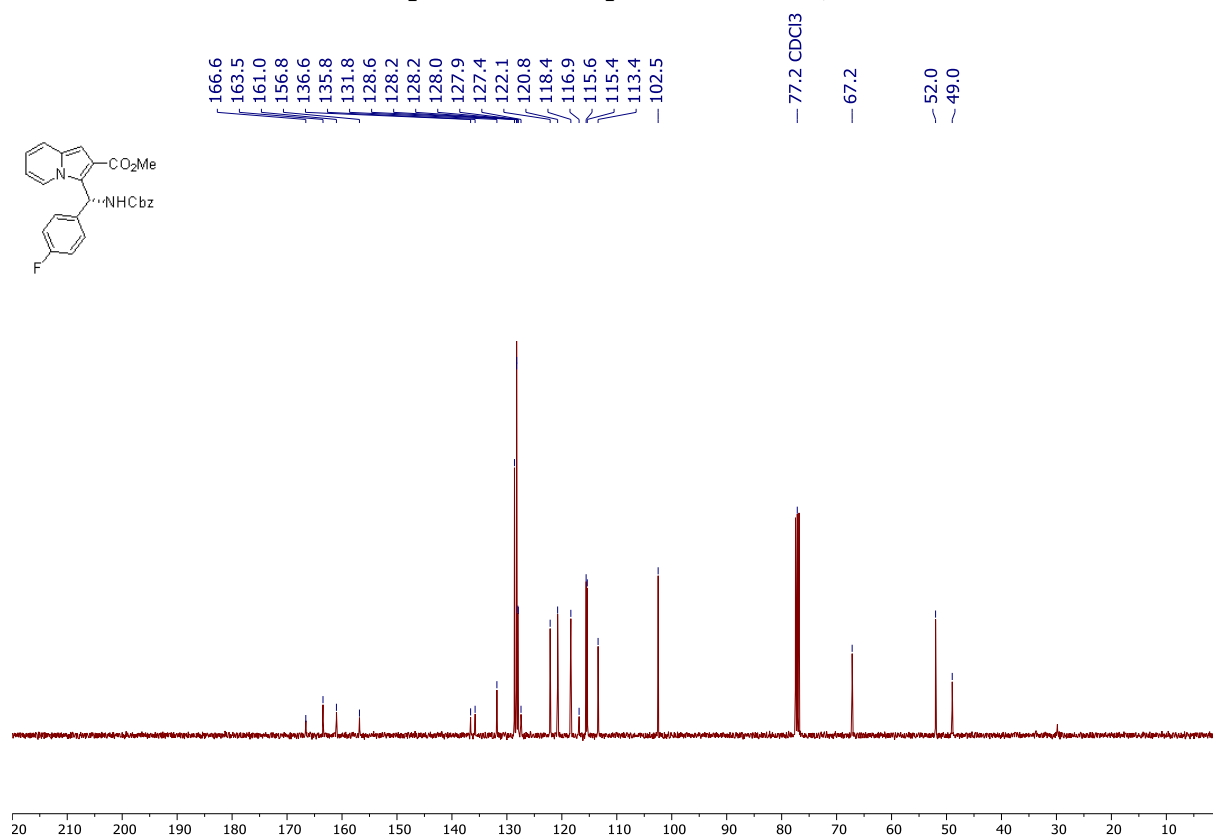

**$^{19}\text{F}$  NMR spectrum of compound 7b ( $\text{CDCl}_3$ , 376 MHz)**

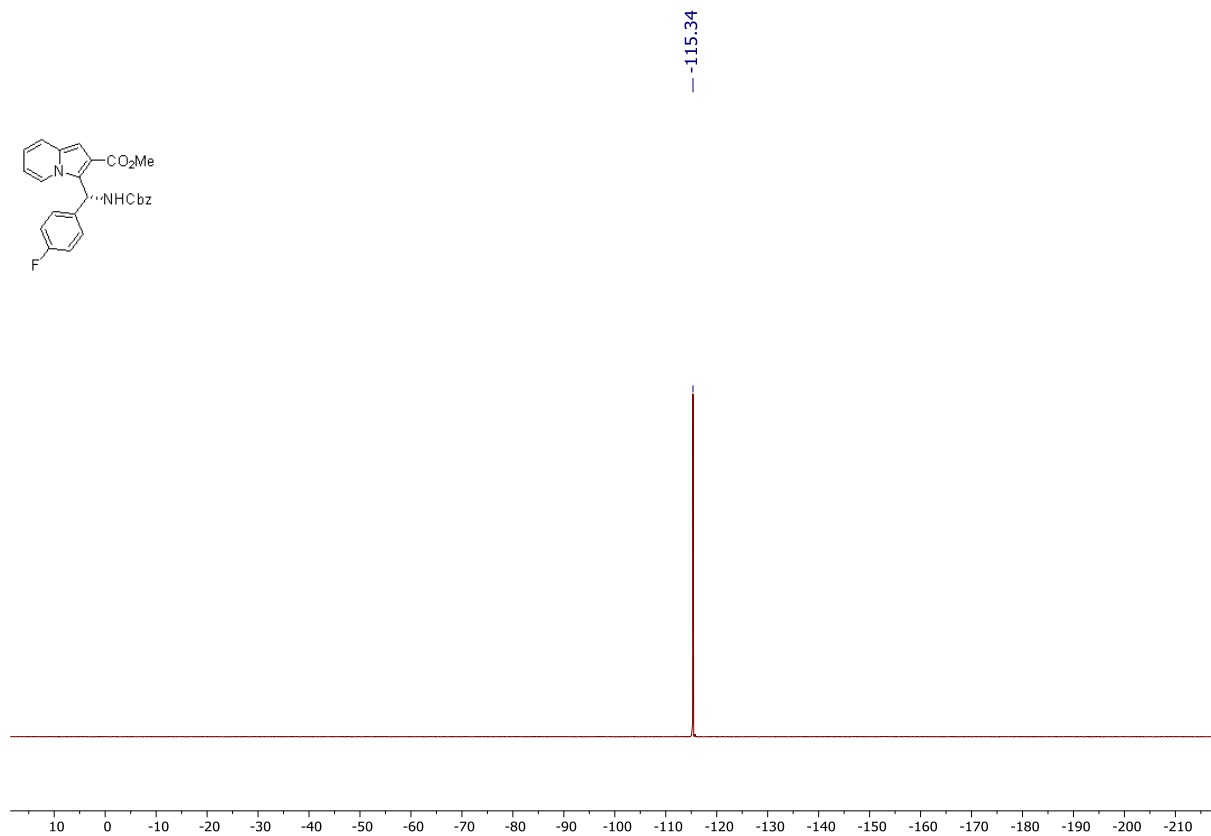

**<sup>1</sup>H NMR spectrum of compound 7c (CDCl<sub>3</sub>, 400 MHz)**

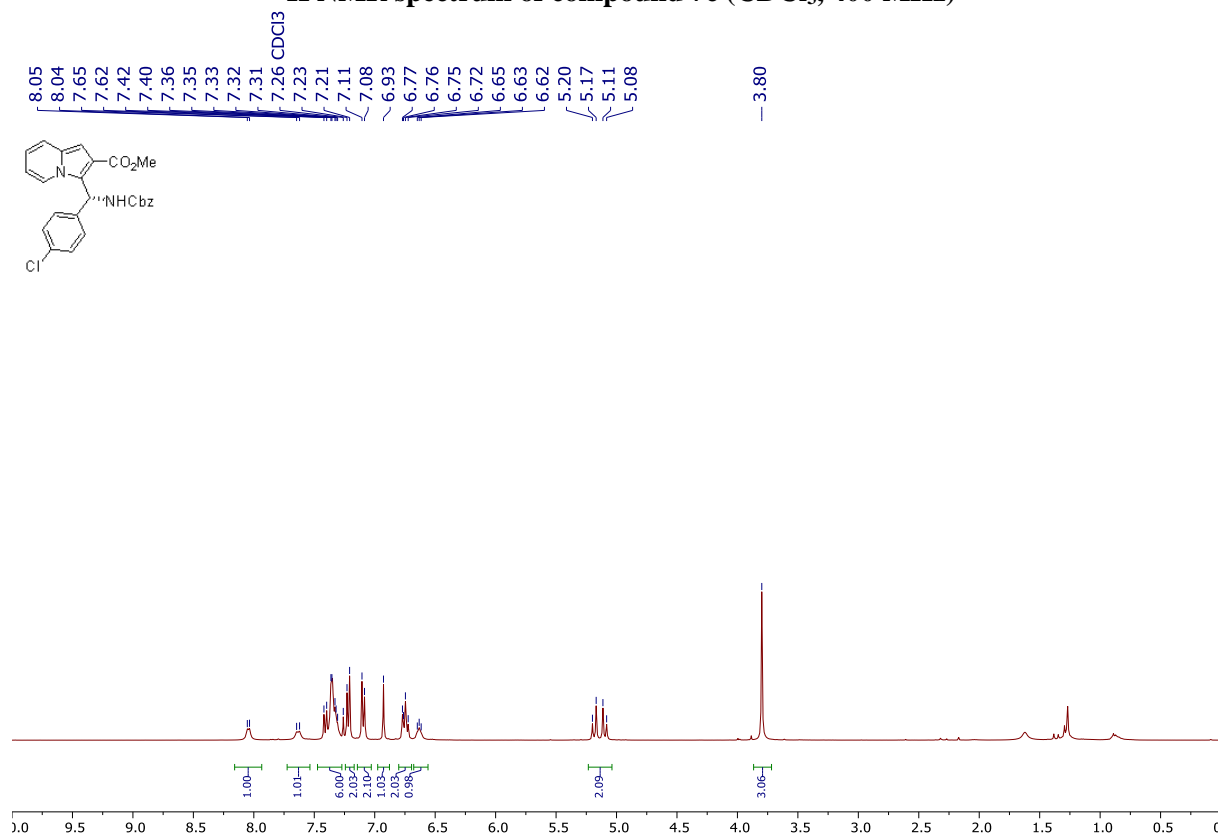

**<sup>13</sup>C NMR spectrum of compound 7c (CDCl<sub>3</sub>, 101 MHz)**

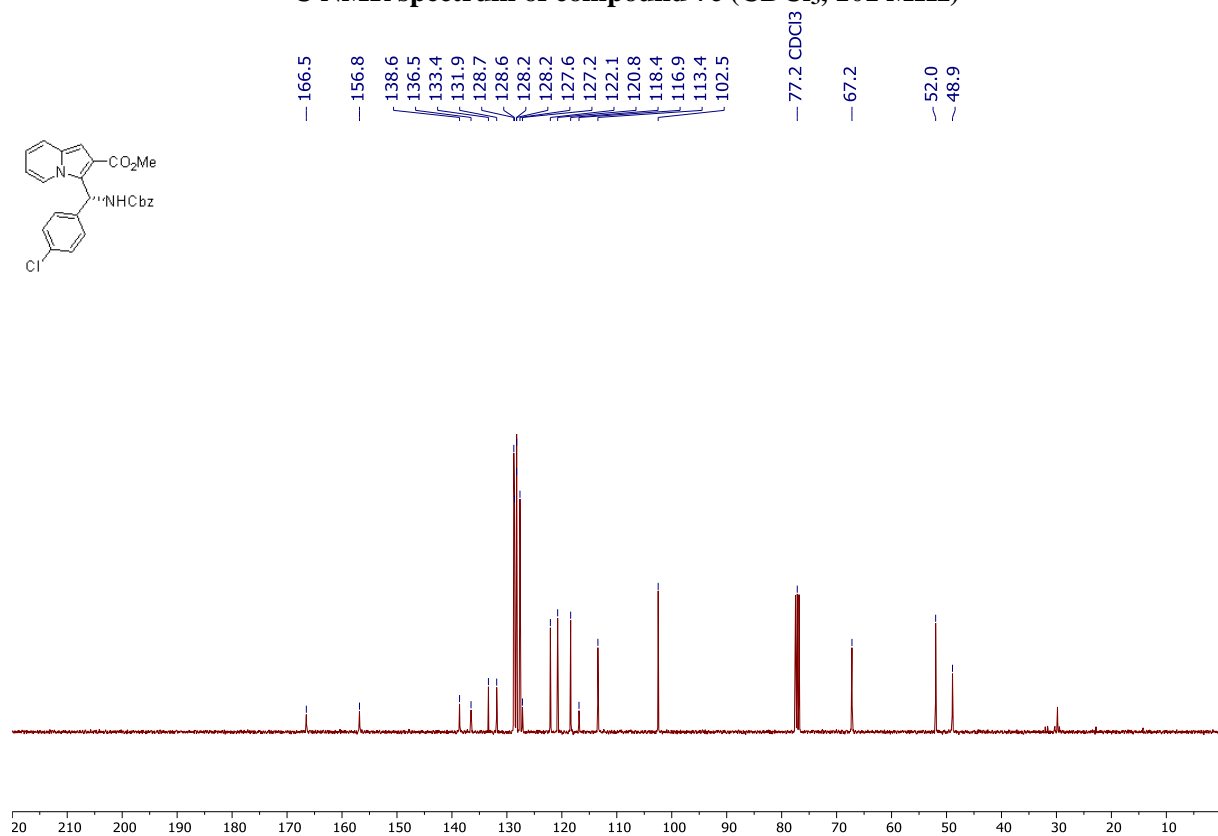



**<sup>1</sup>H NMR spectrum of compound 7d (CDCl<sub>3</sub>, 400 MHz)**

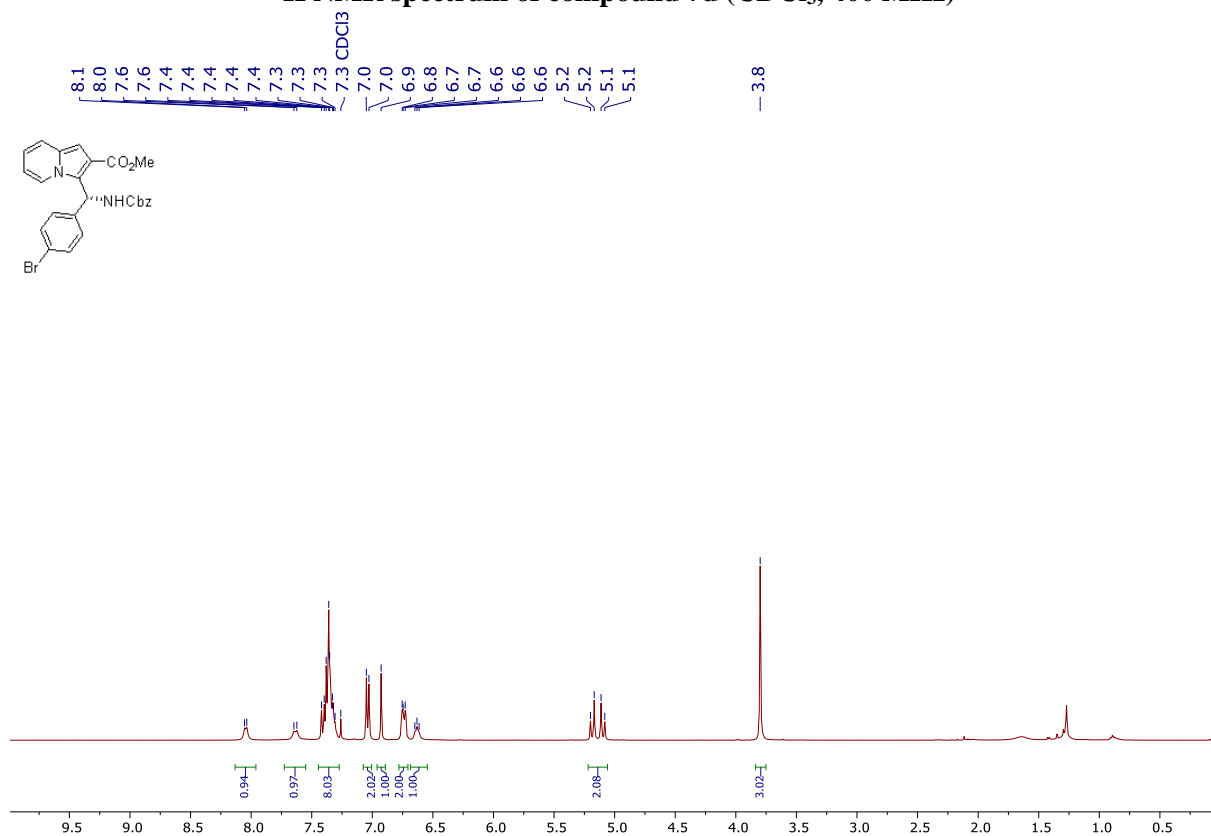

**<sup>13</sup>C NMR spectrum of compound 7d (CDCl<sub>3</sub>, 101 MHz)**

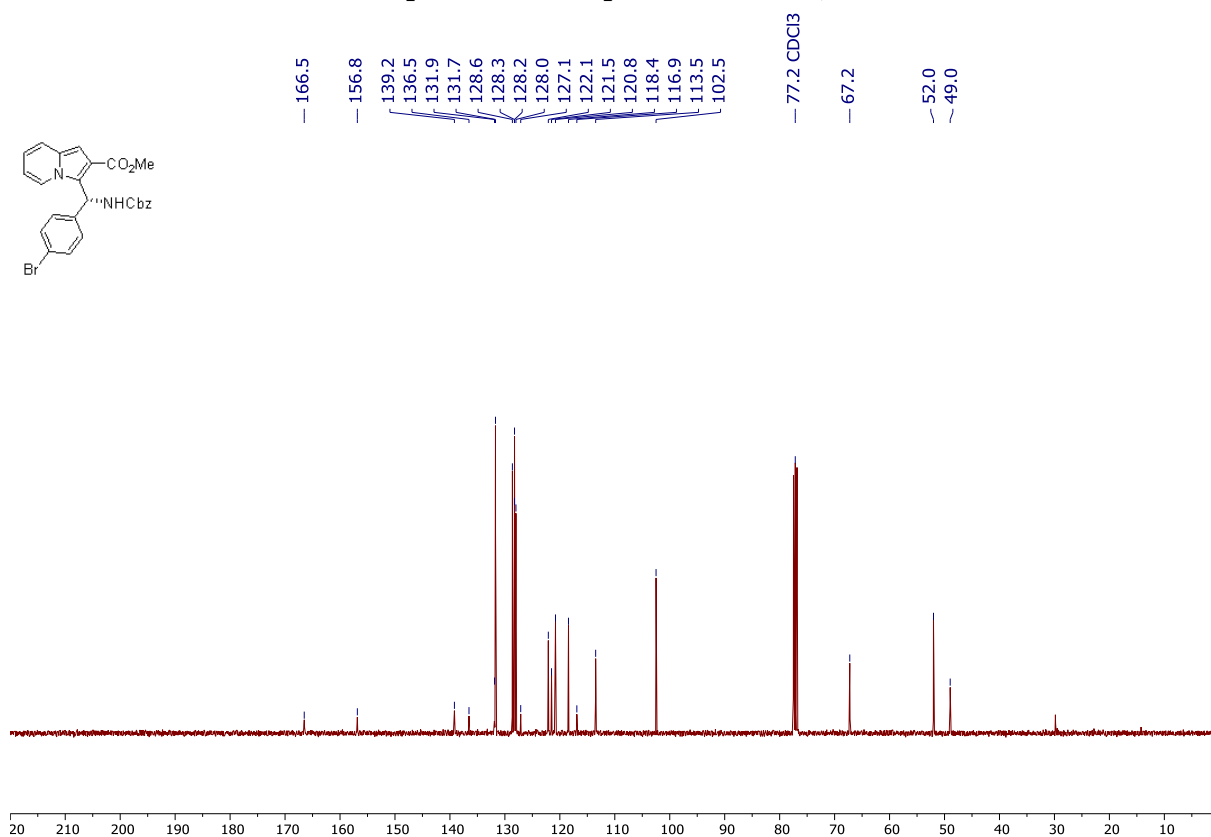

**<sup>1</sup>H NMR spectrum of compound 7e (CDCl<sub>3</sub>, 400 MHz)**

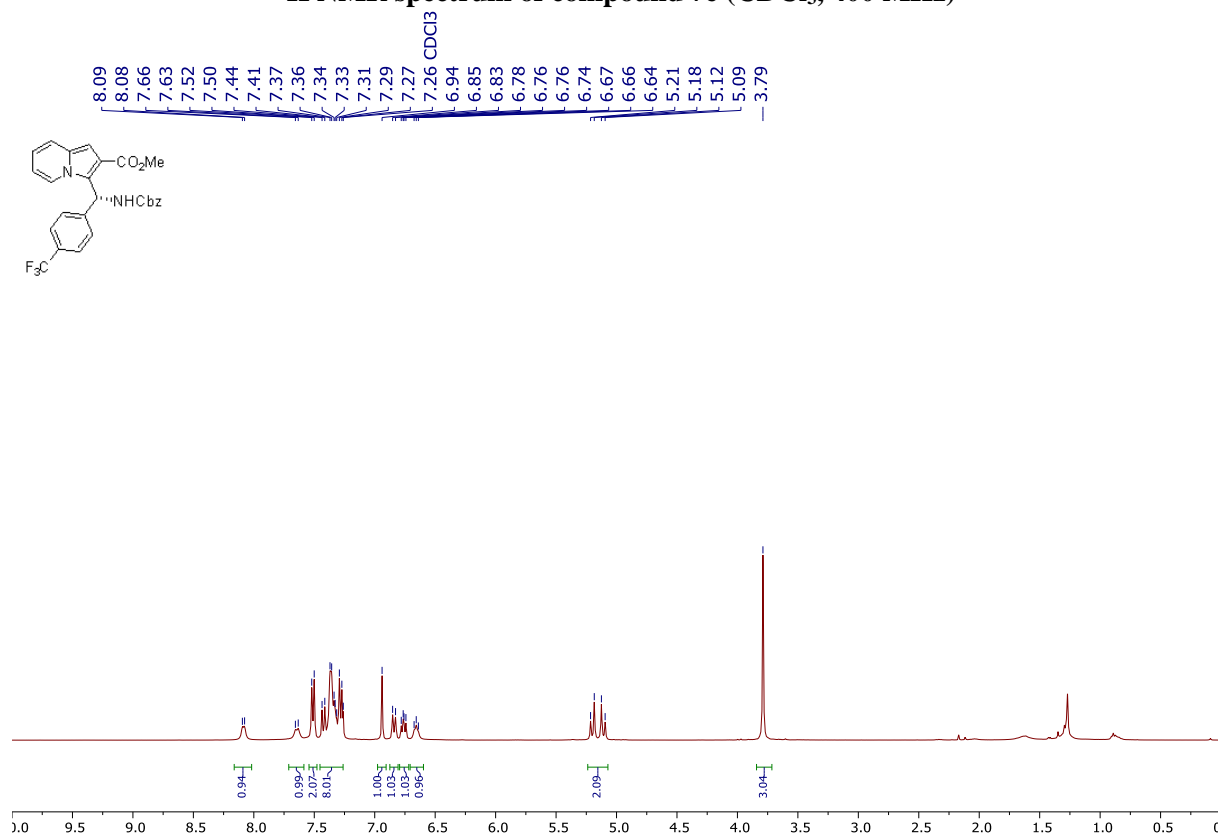

**<sup>13</sup>C NMR spectrum of compound 7e (CDCl<sub>3</sub>, 101 MHz)**

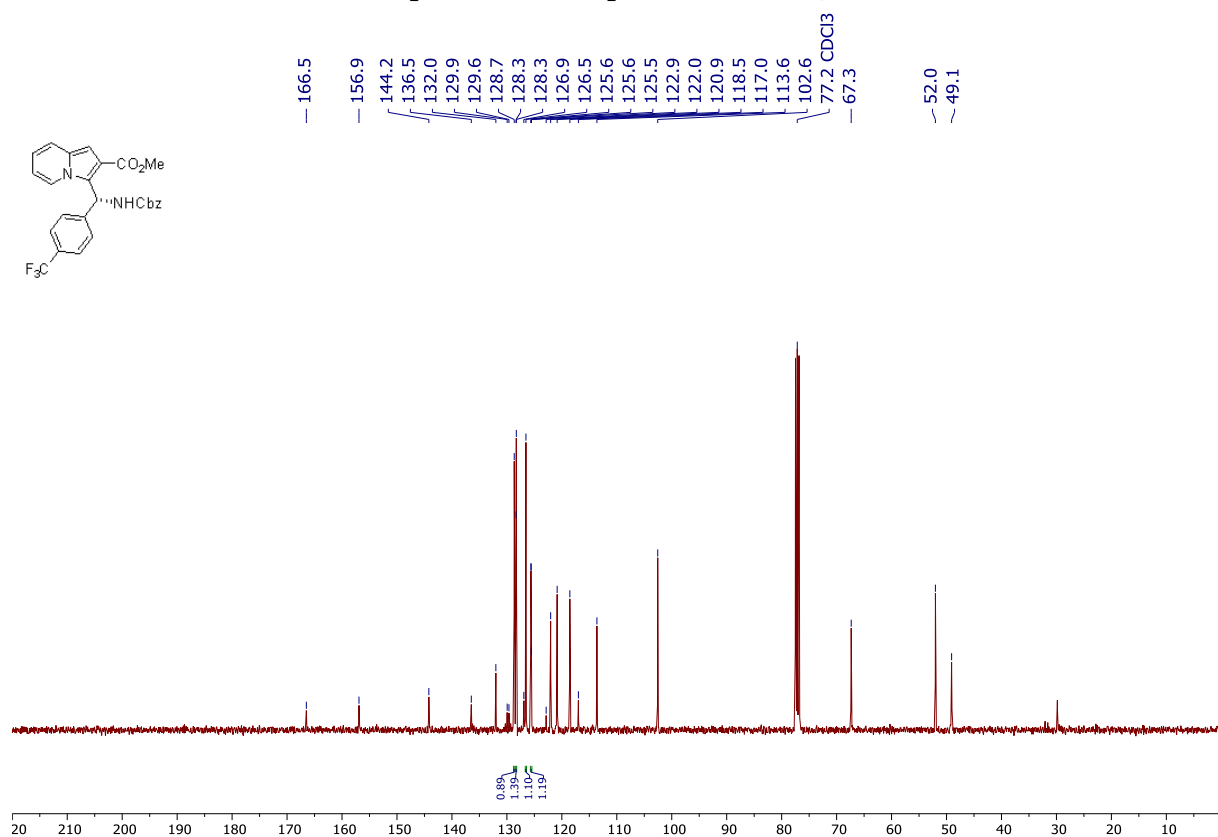

**$^{19}\text{F}$  NMR spectrum of compound 7e ( $\text{CDCl}_3$ , 376 MHz)**

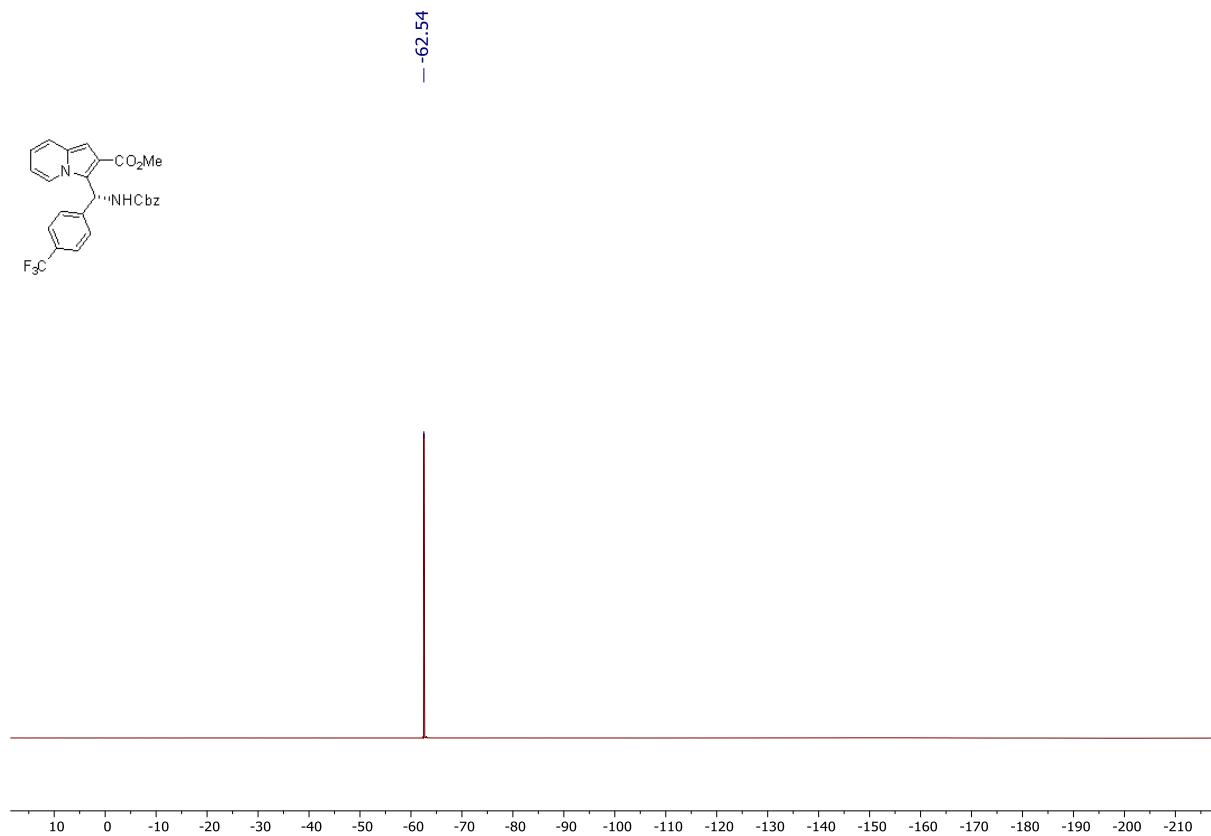

**<sup>1</sup>H NMR spectrum of compound 7f (CDCl<sub>3</sub>, 400 MHz)**

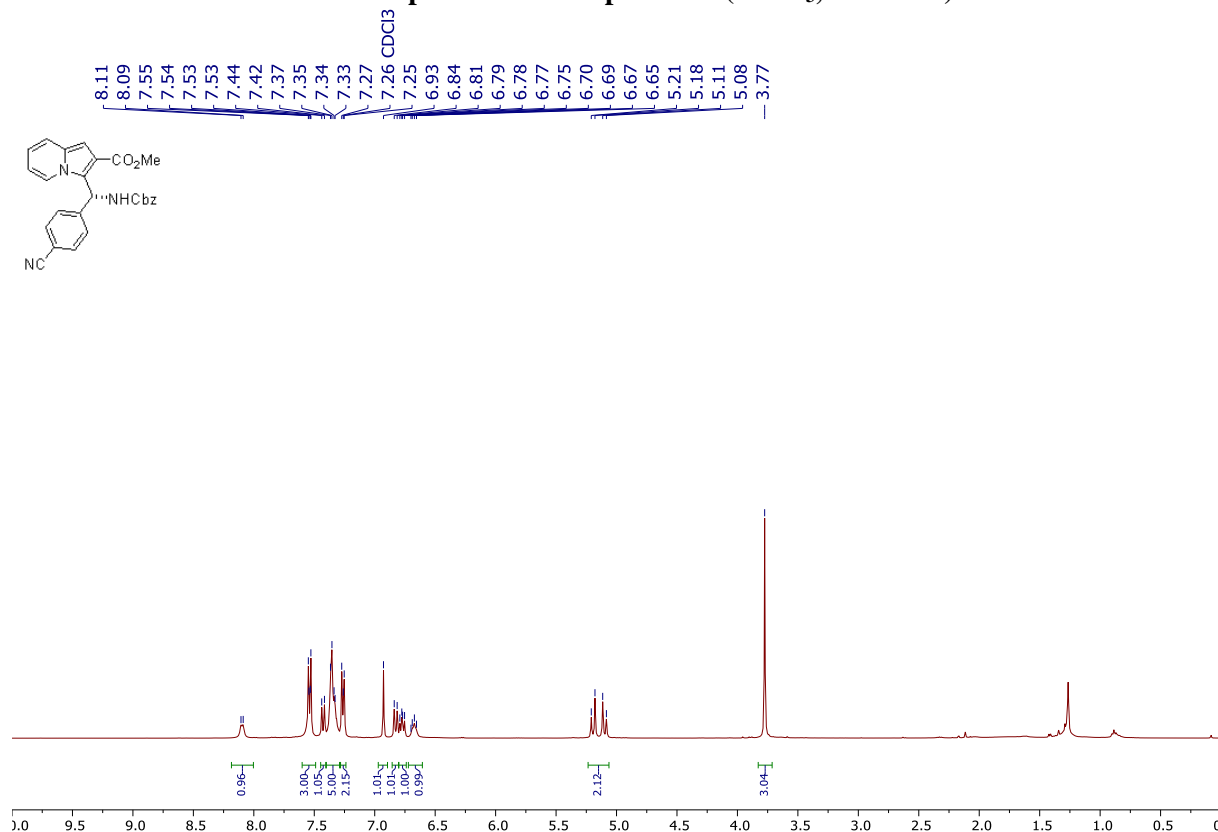

**<sup>13</sup>C NMR spectrum of compound 7f (CDCl<sub>3</sub>, 101 MHz)**

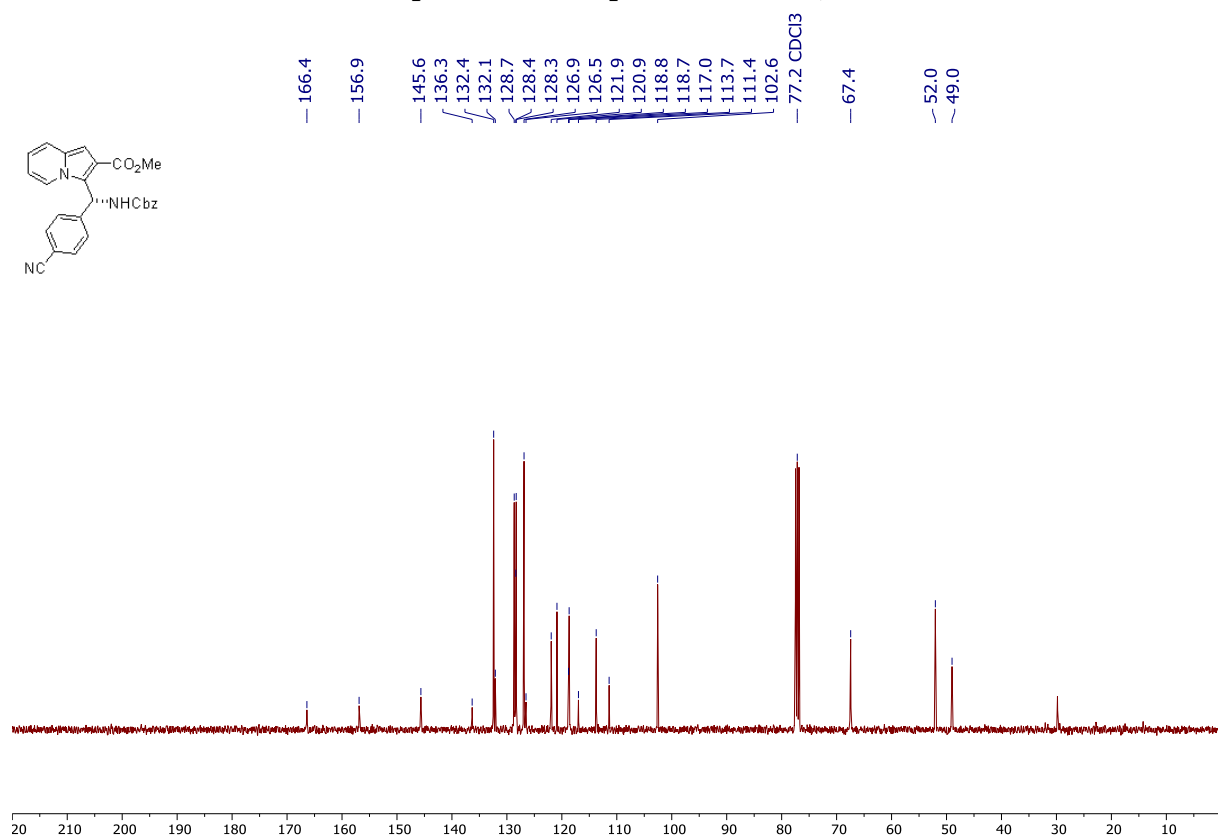

**<sup>1</sup>H NMR spectrum of compound 7g (CDCl<sub>3</sub>, 400 MHz)**

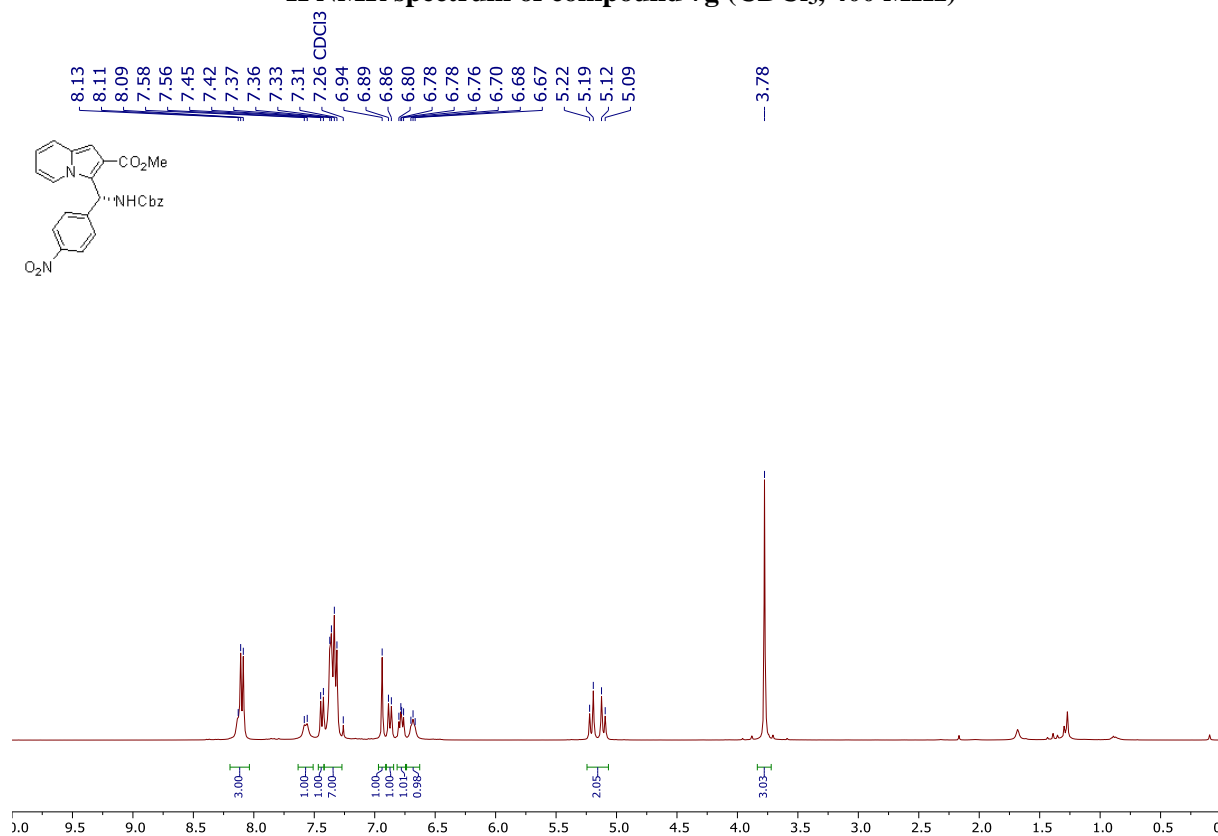

**<sup>13</sup>C NMR spectrum of compound 7g (CDCl<sub>3</sub>, 101 MHz)**

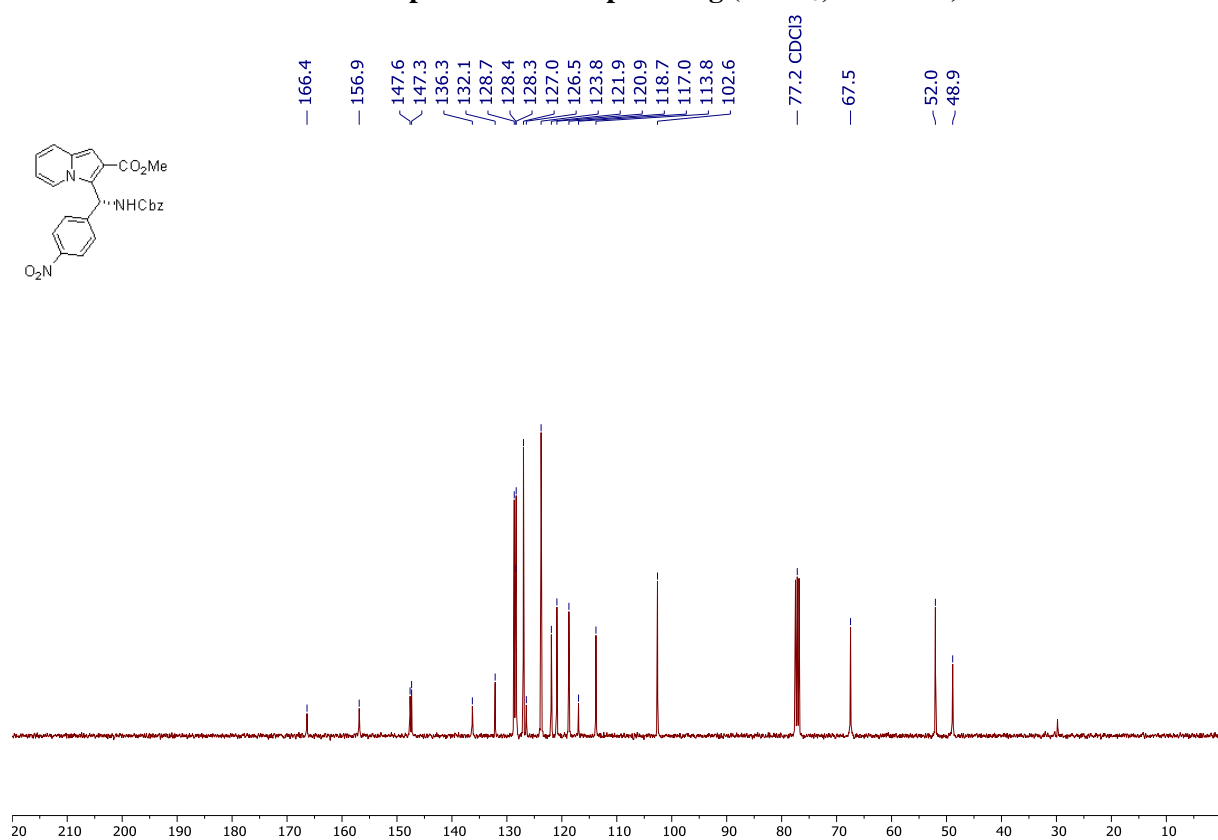

**<sup>1</sup>H NMR spectrum of compound 7h (CDCl<sub>3</sub>, 400 MHz)**

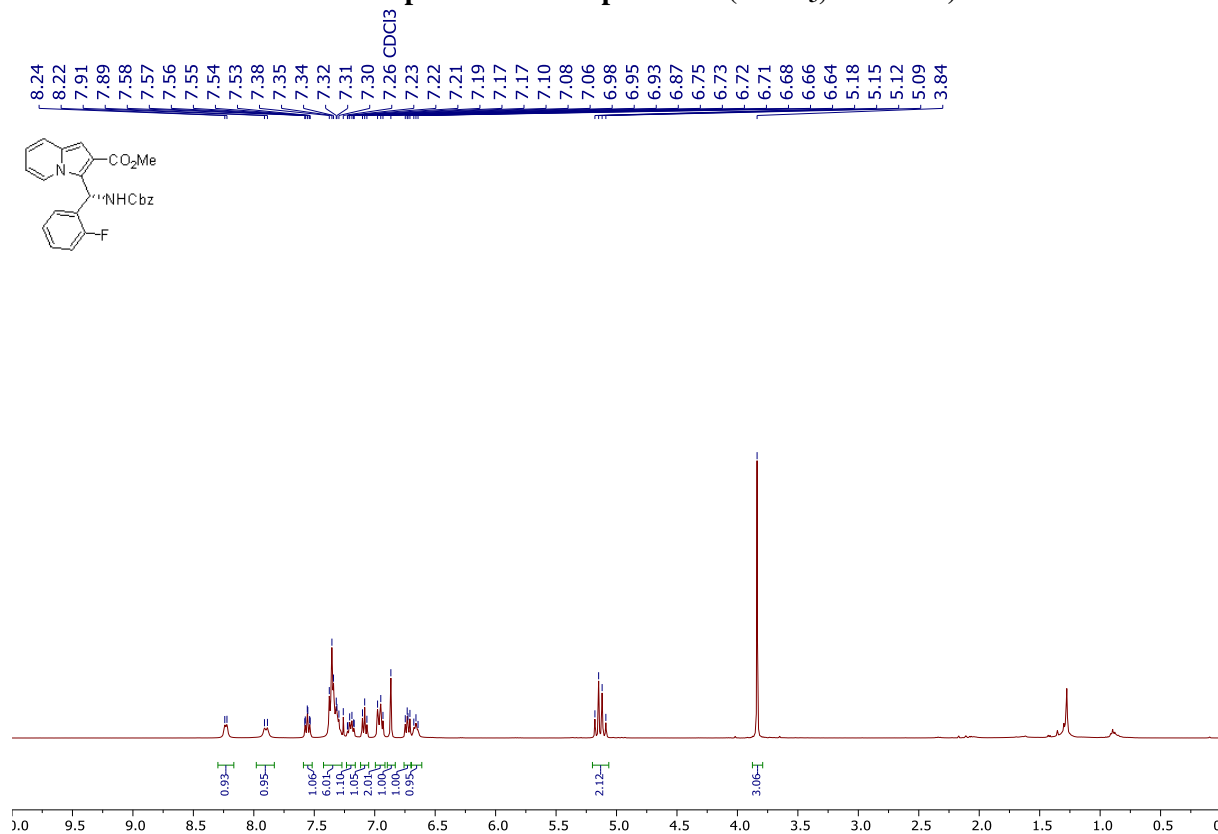

**<sup>13</sup>C NMR spectrum of compound 7h (CDCl<sub>3</sub>, 101 MHz)**

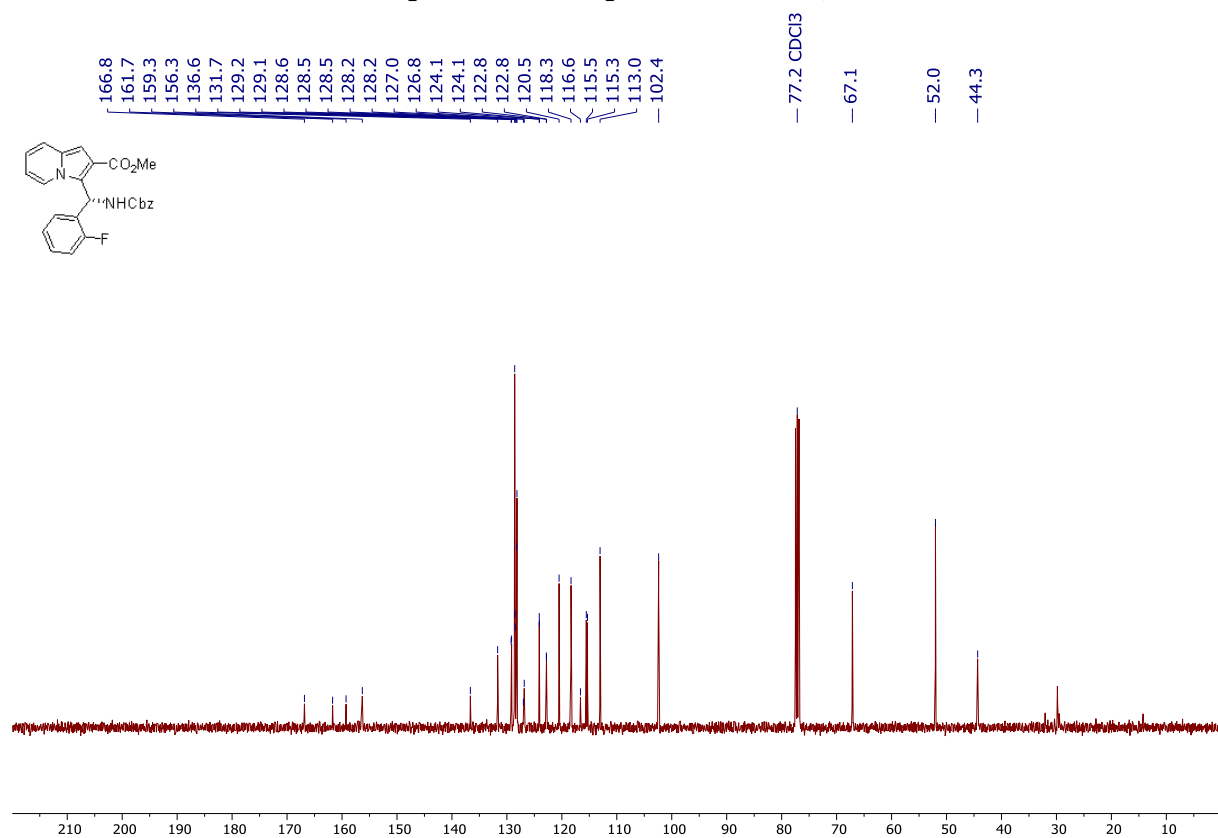

**$^{19}\text{F}$  NMR spectrum of compound 7h ( $\text{CDCl}_3$ , 376 MHz)**

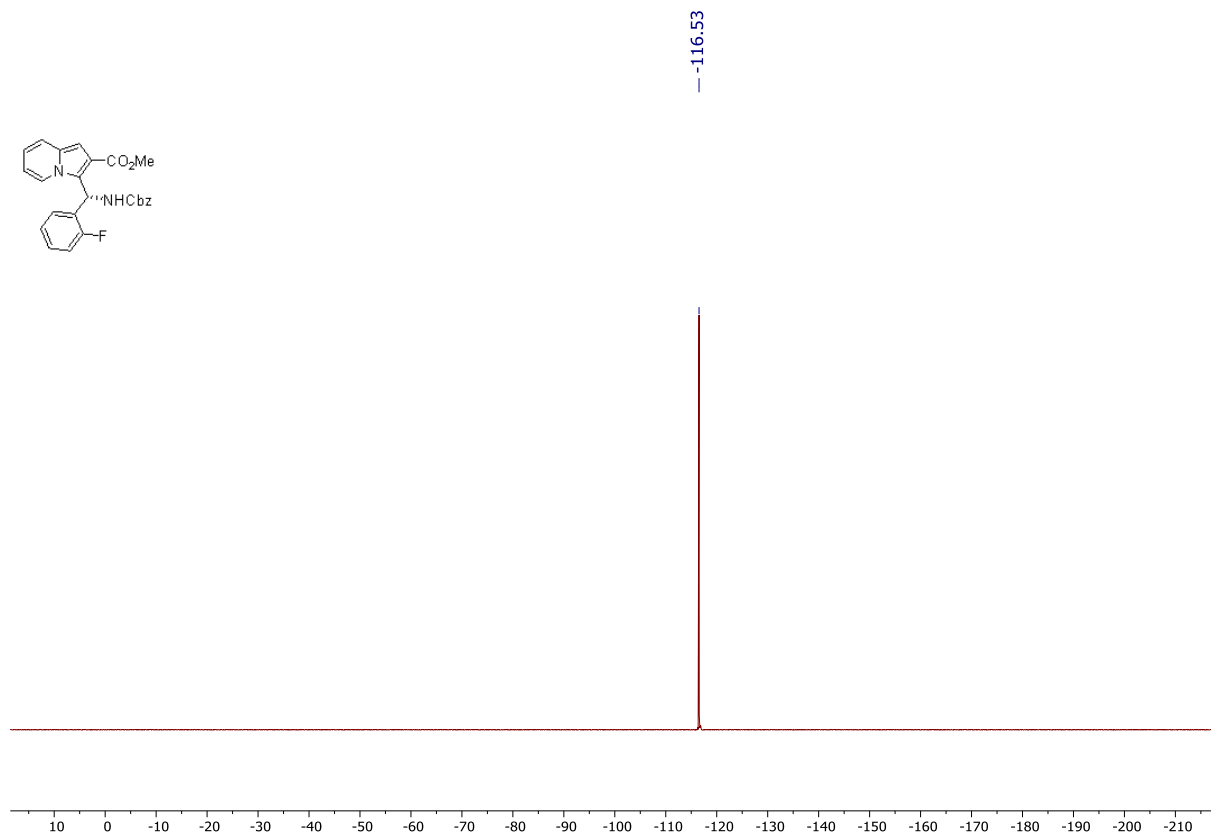

**<sup>1</sup>H NMR spectrum of compound 7i (CDCl<sub>3</sub>, 400 MHz)**

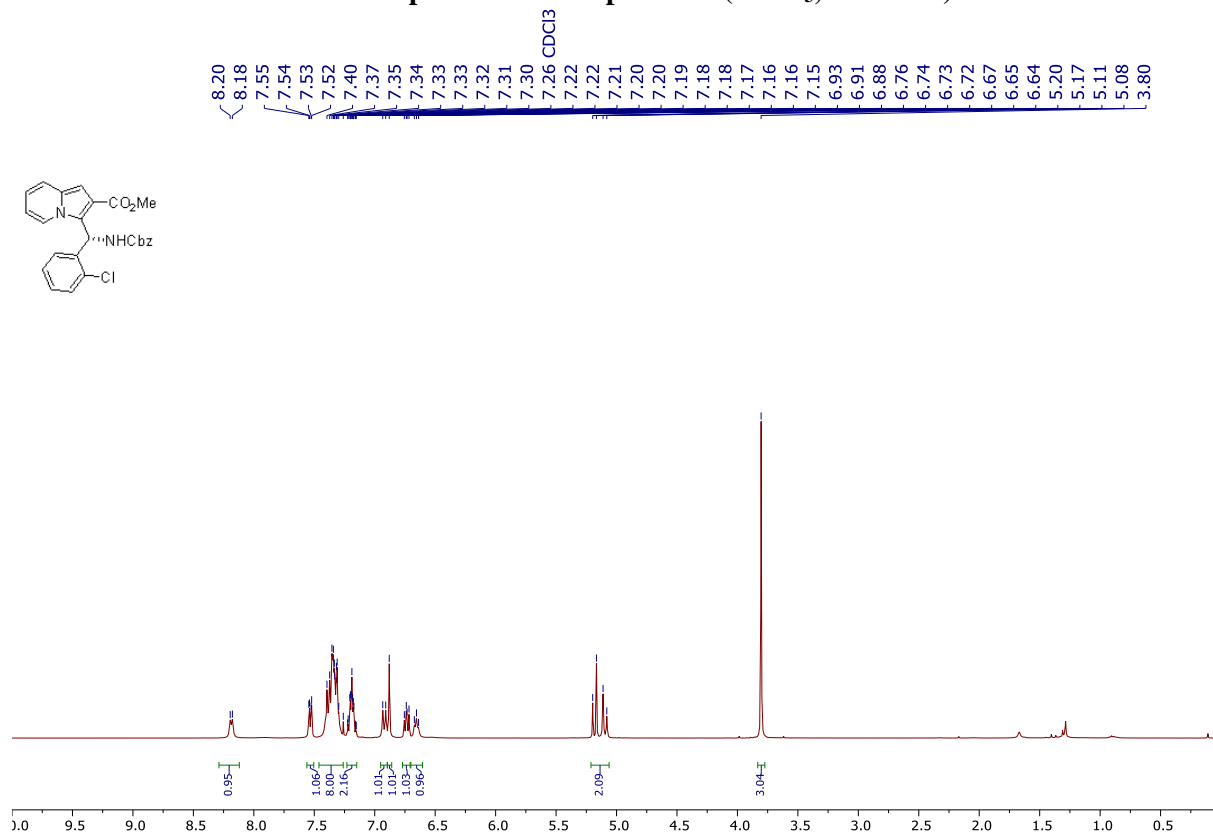

**<sup>13</sup>C NMR spectrum of compound 7i (CDCl<sub>3</sub>, 101 MHz)**

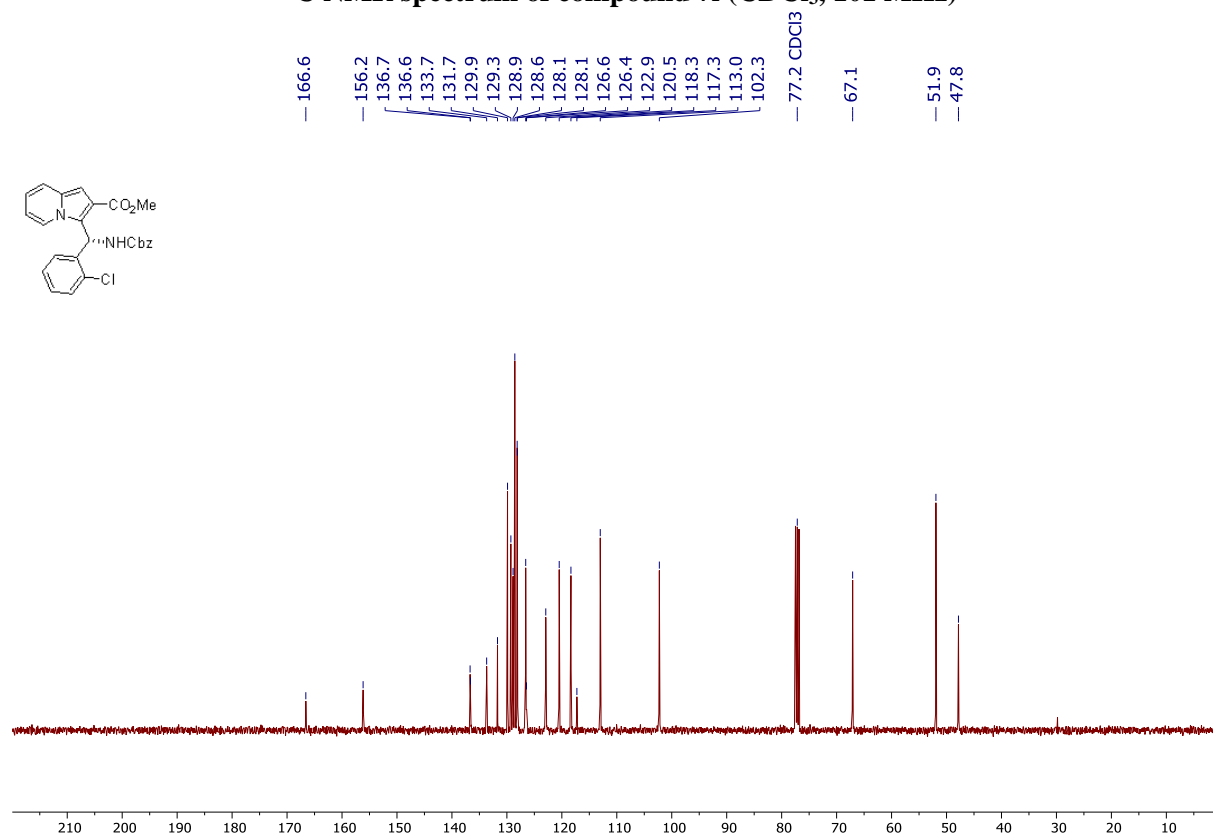



**<sup>1</sup>H NMR spectrum of compound 7j (CDCl<sub>3</sub>, 400 MHz)**

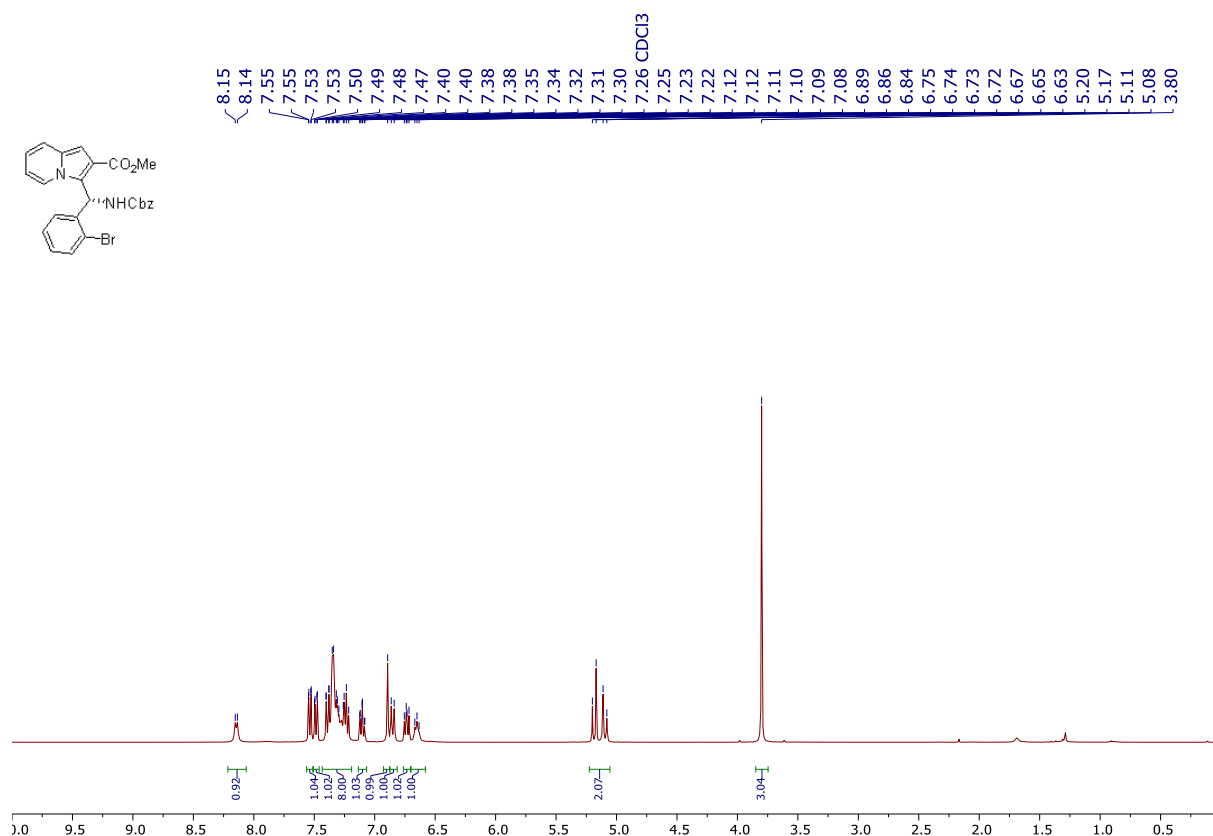

**<sup>13</sup>C NMR spectrum of compound 7j (CDCl<sub>3</sub>, 101 MHz)**

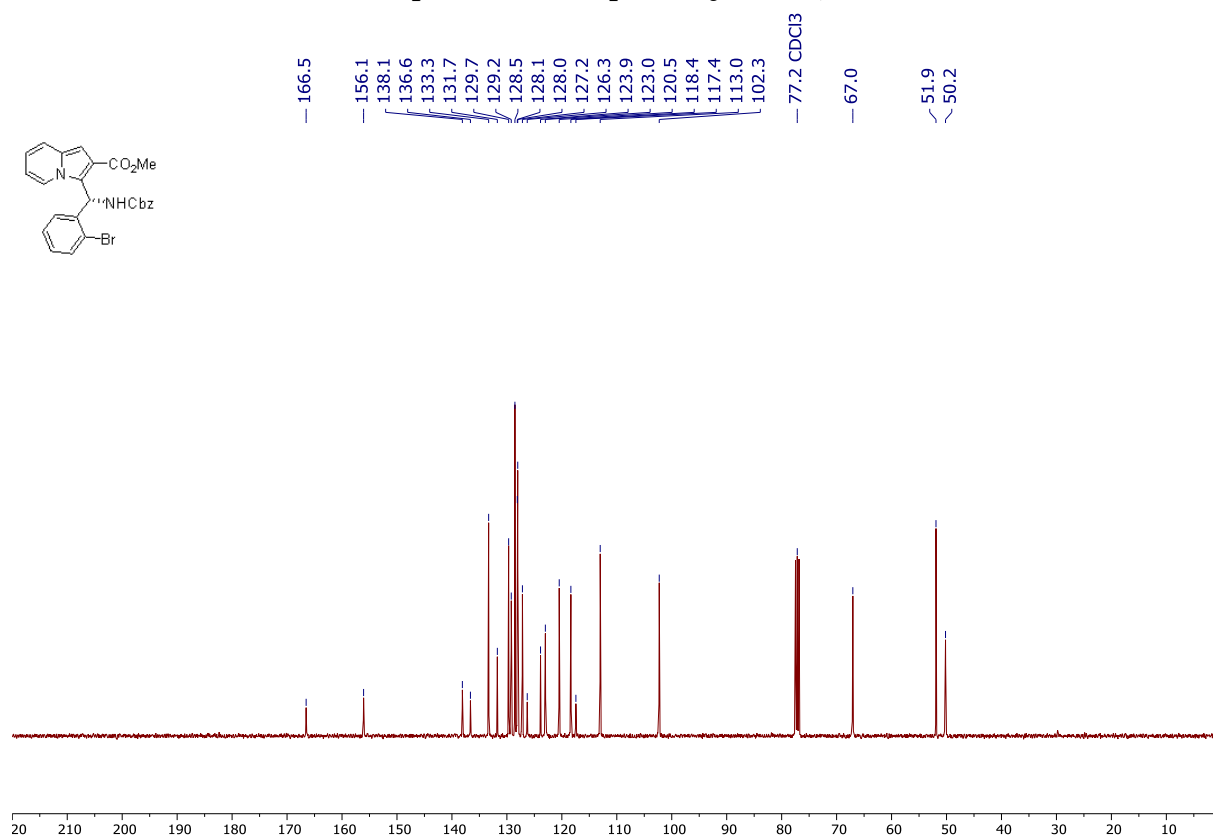

**<sup>1</sup>H NMR spectrum of compound 7k (CDCl<sub>3</sub>, 400 MHz)**

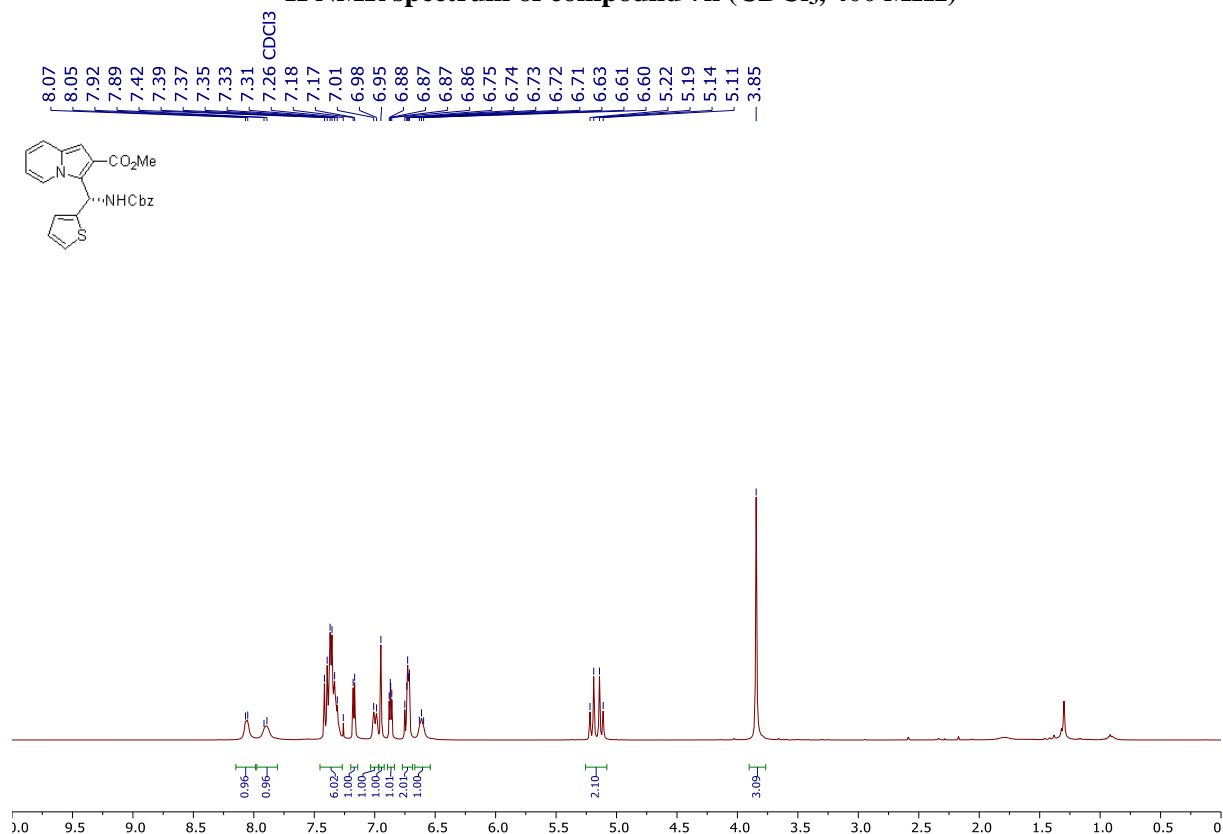

**<sup>13</sup>C NMR spectrum of compound 7k (CDCl<sub>3</sub>, 101 MHz)**

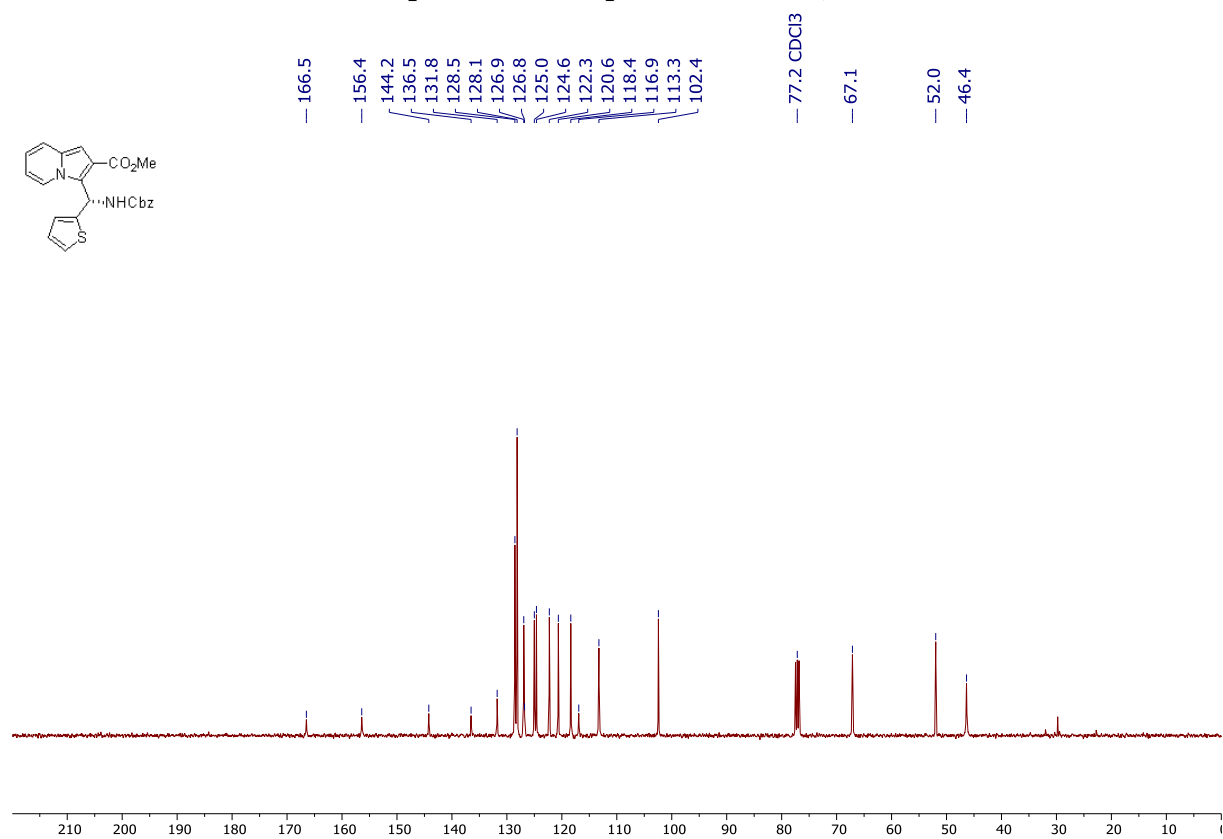

**<sup>1</sup>H NMR spectrum of compound 7l (CDCl<sub>3</sub>, 400 MHz)**

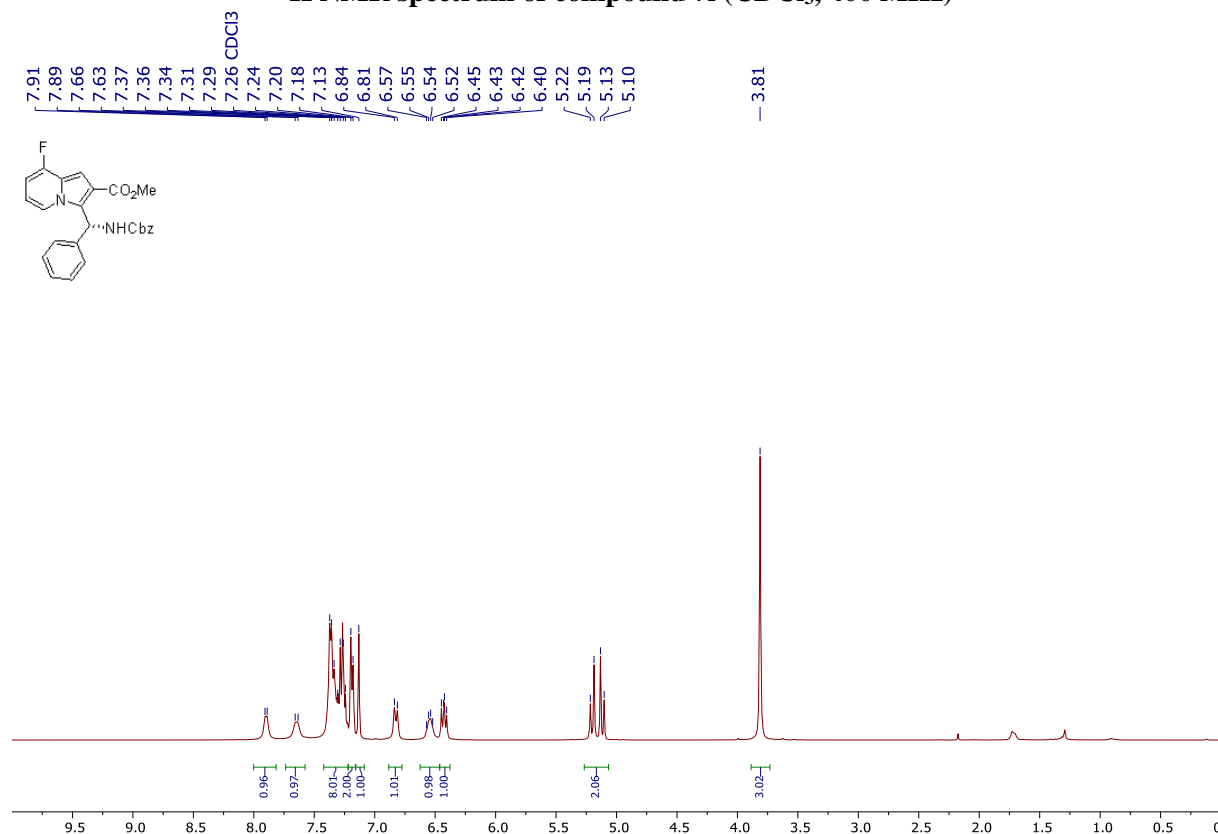

**<sup>13</sup>C NMR spectrum of compound 7l (CDCl<sub>3</sub>, 101 MHz)**

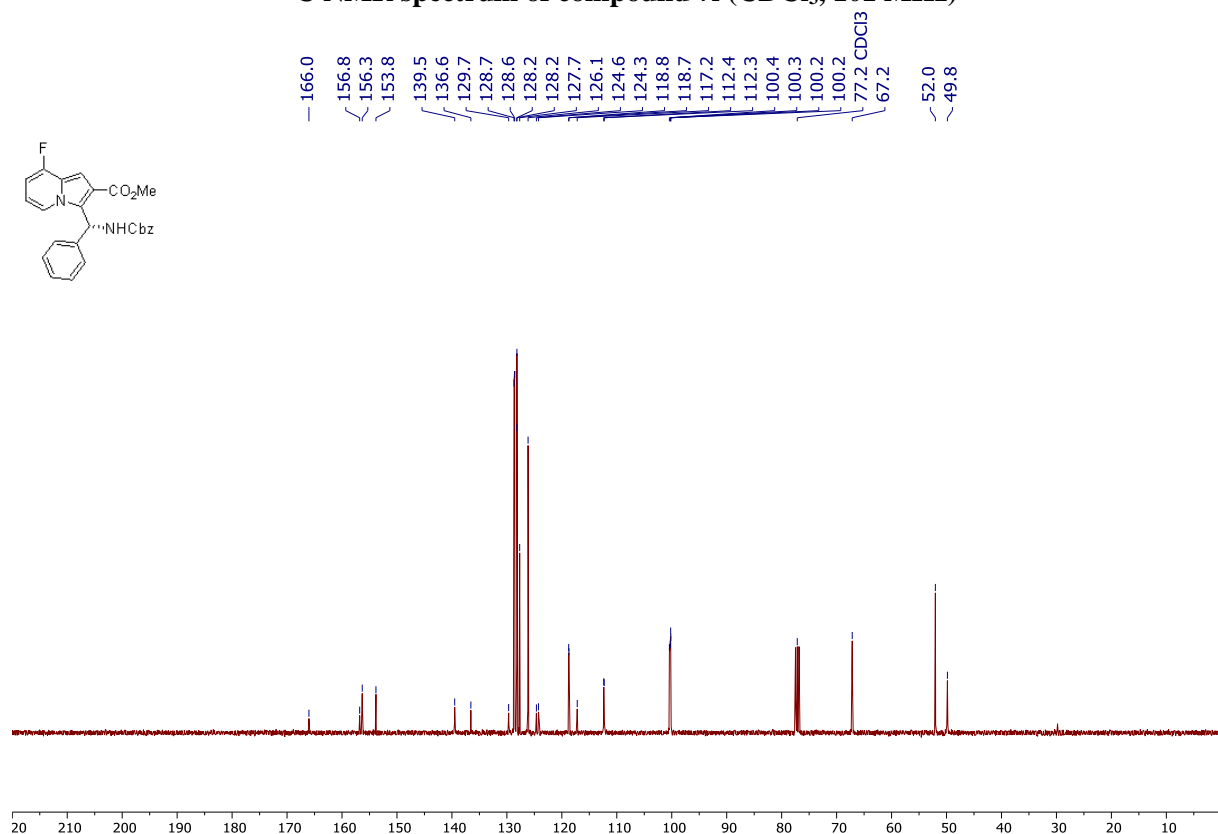

**$^{19}\text{F}$  NMR spectrum of compound 71 ( $\text{CDCl}_3$ , 376 MHz)**

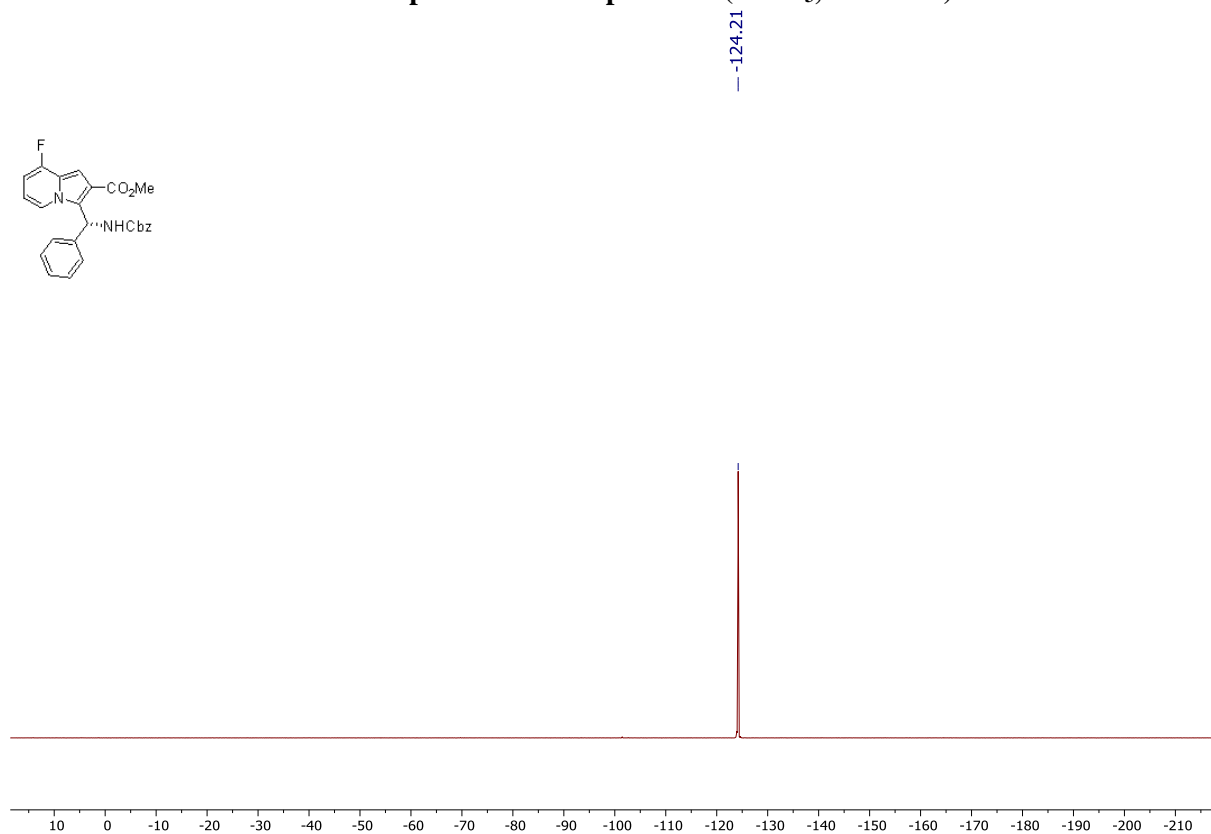

**<sup>1</sup>H NMR spectrum of compound 7m (CDCl<sub>3</sub>, 400 MHz)**

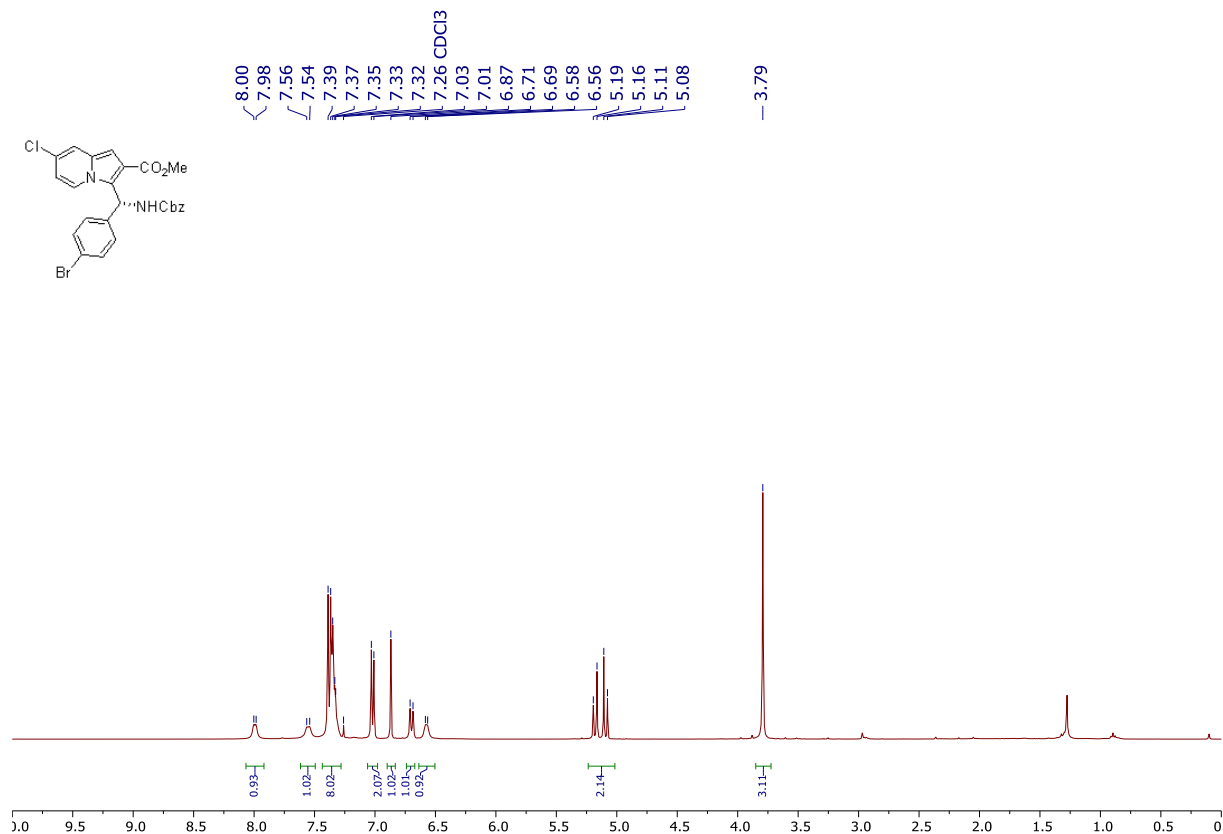

**<sup>13</sup>C NMR spectrum of compound 7m (CDCl<sub>3</sub>, 101 MHz)**

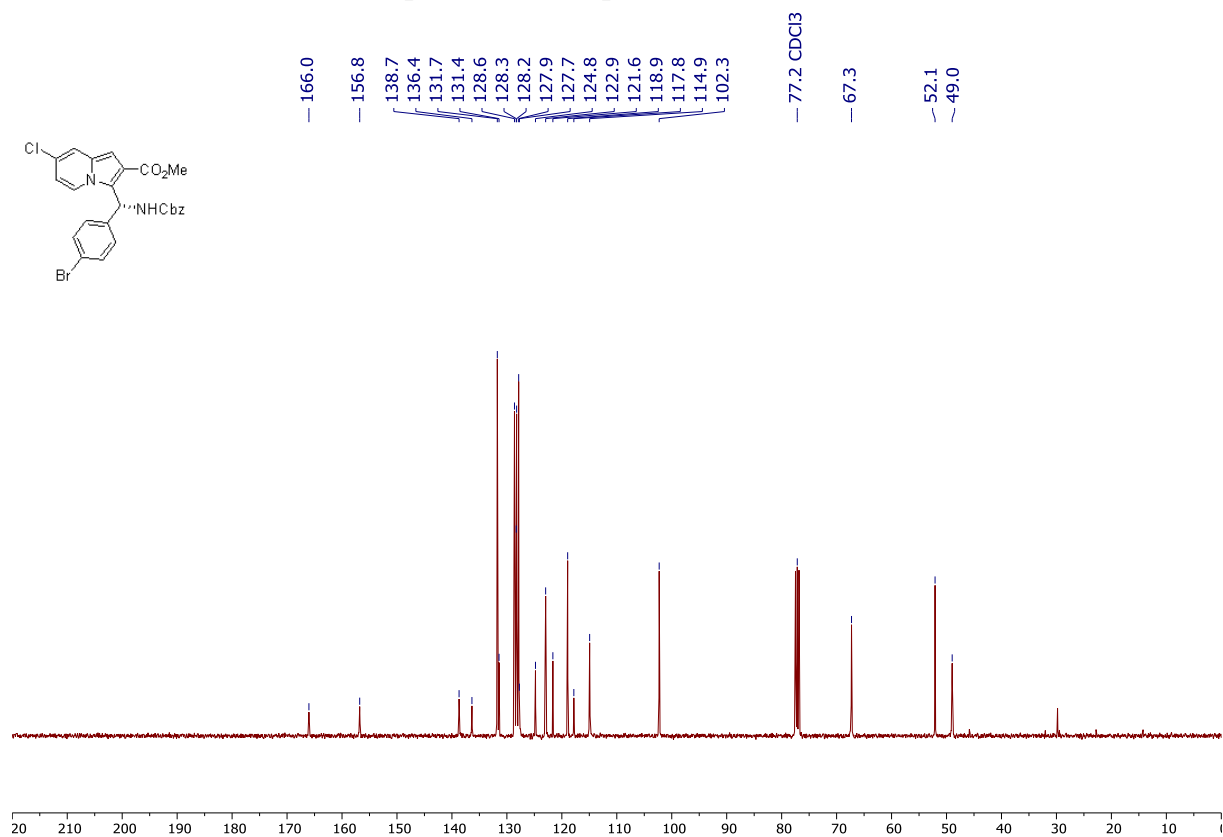

**<sup>1</sup>H NMR spectrum of compound 8 (CDCl<sub>3</sub>, 500 MHz)**

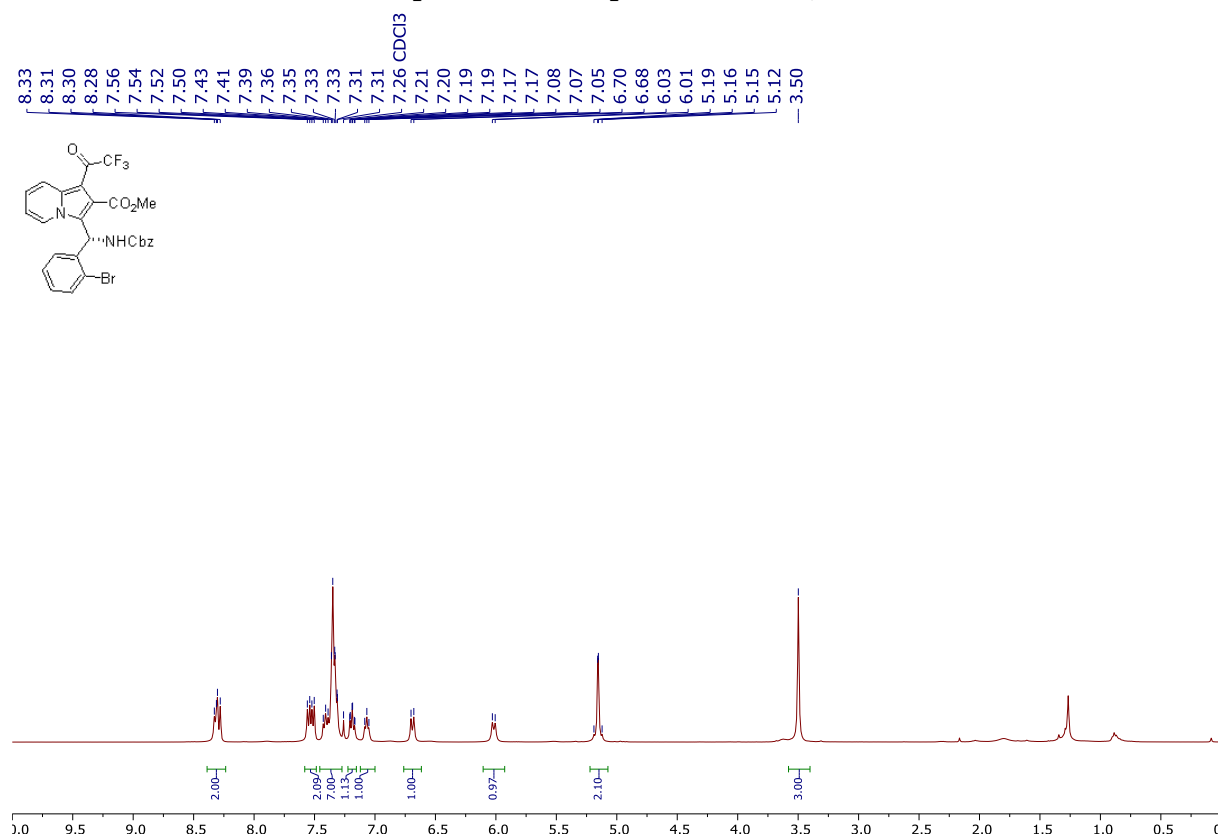

**<sup>13</sup>C NMR spectrum of compound 8 (CDCl<sub>3</sub>, 101 MHz)**

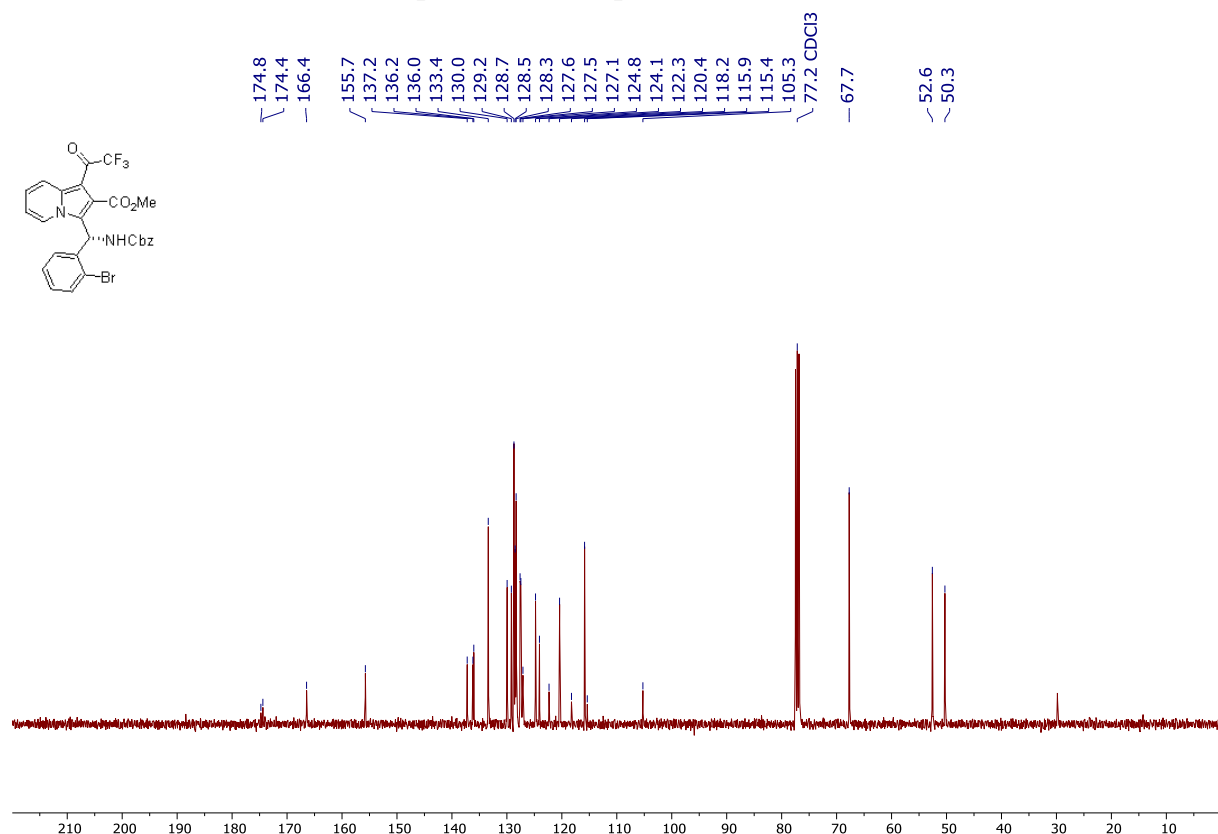

**$^{19}\text{F}$  NMR spectrum of compound 8 ( $\text{CDCl}_3$ , 376 MHz)**

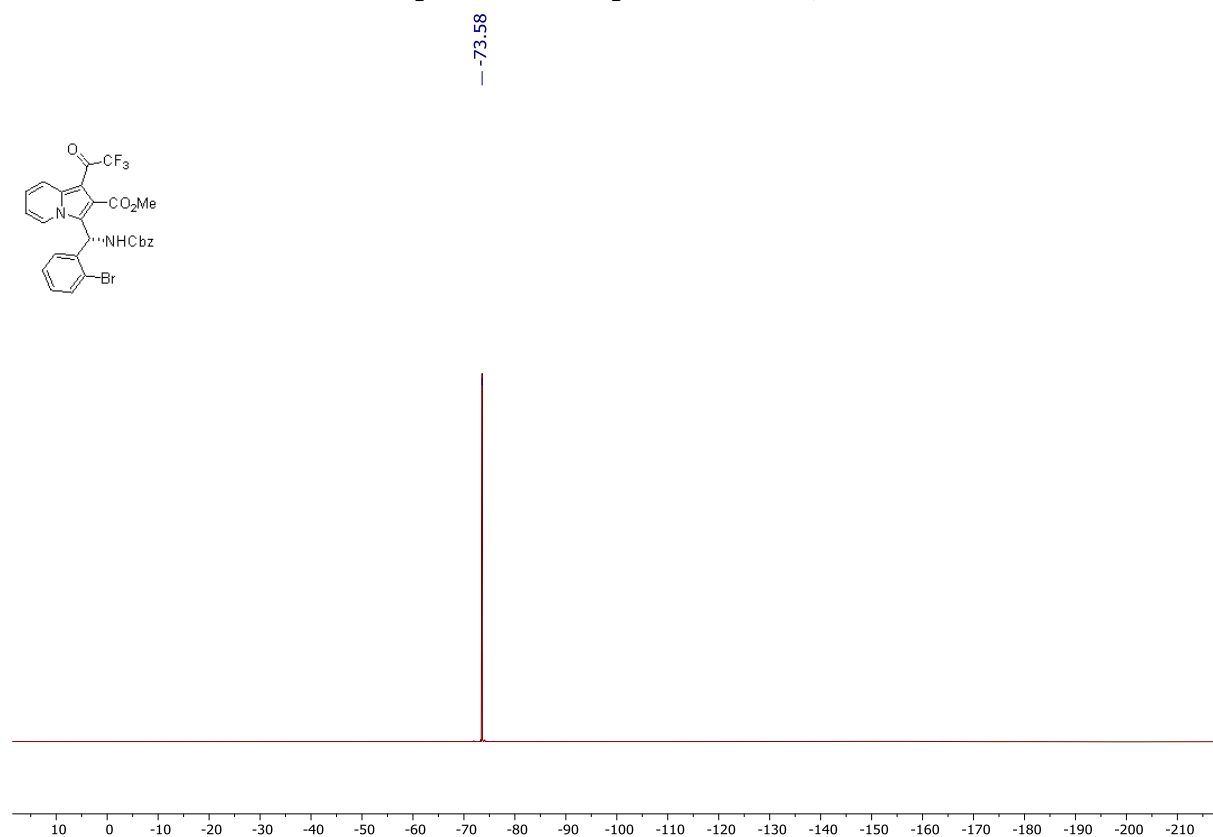

**<sup>1</sup>H NMR spectrum of compound 9 (CDCl<sub>3</sub>, 400 MHz)**

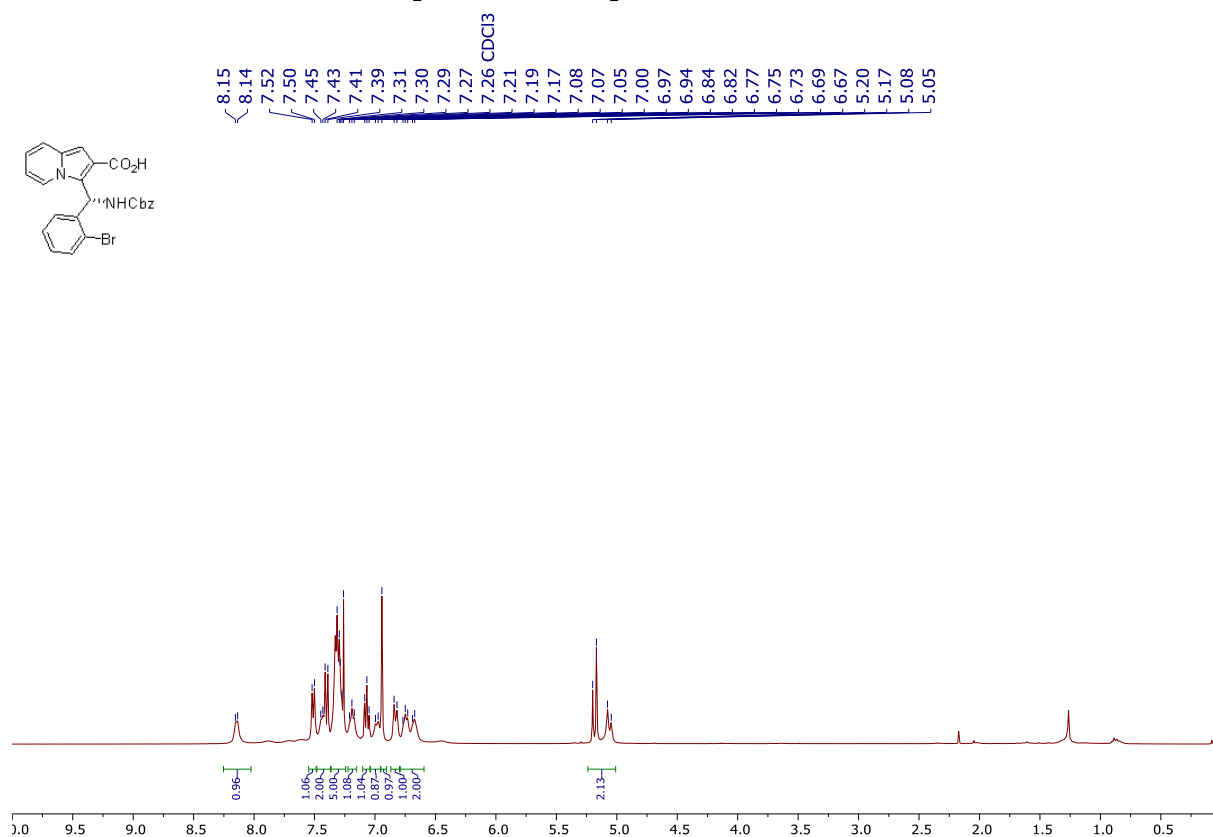

**<sup>13</sup>C NMR spectrum of compound X (CDCl<sub>3</sub>, 126 MHz)**

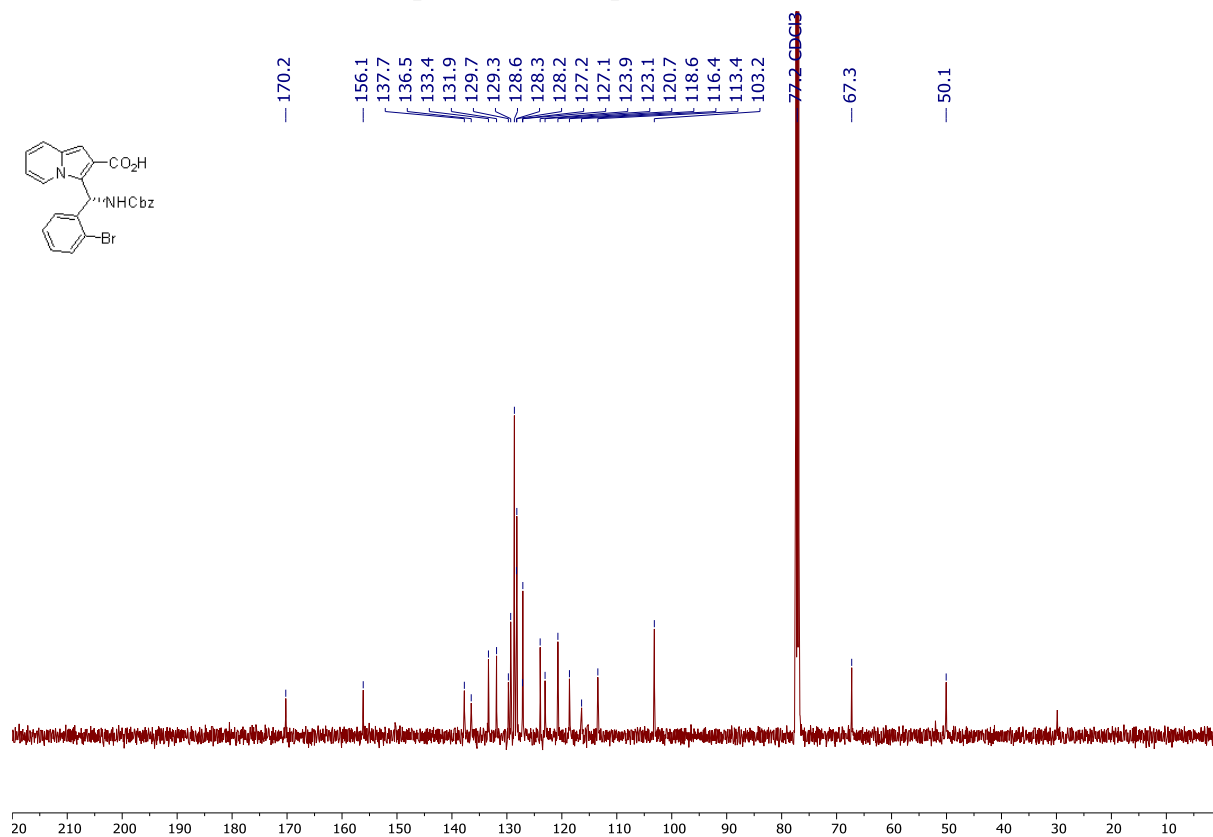



### 6.3. *N*-Boc amins 2a-m

<sup>1</sup>H NMR spectrum of compound 2a (CDCl<sub>3</sub>, 400 MHz)

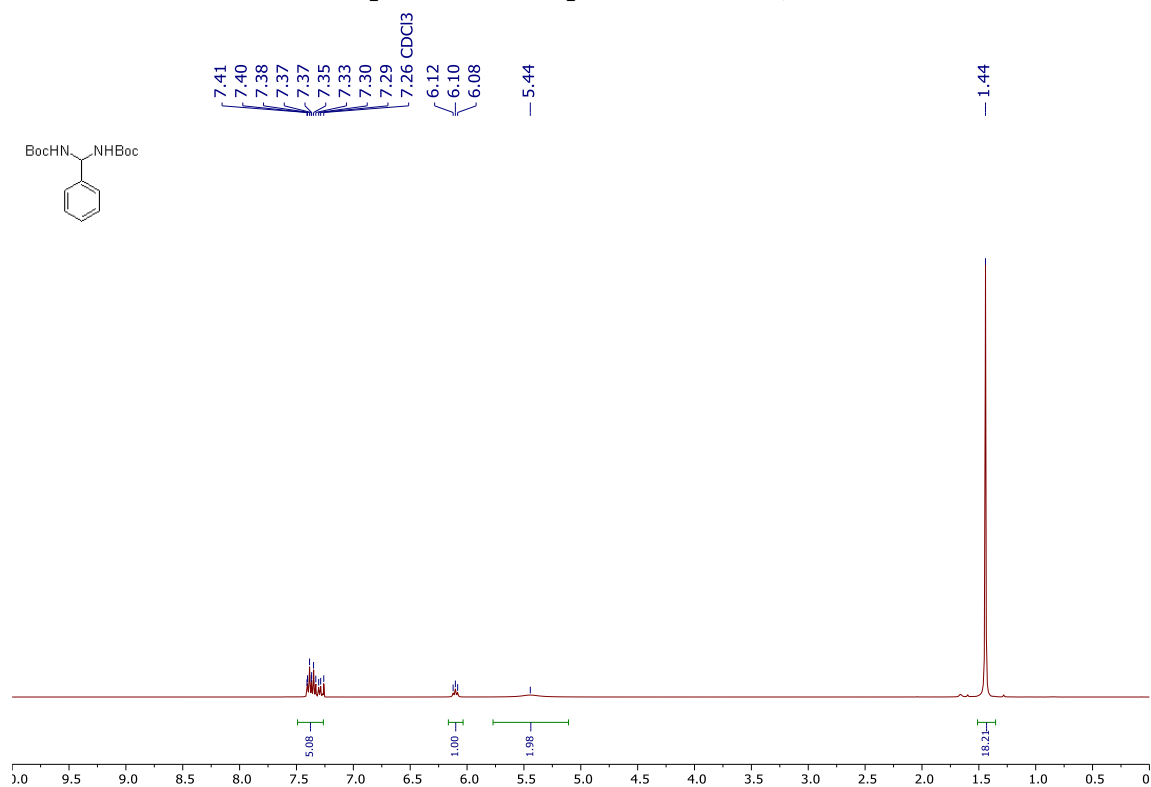

<sup>13</sup>C NMR spectrum of compound 2a (CDCl<sub>3</sub>, 100 MHz)

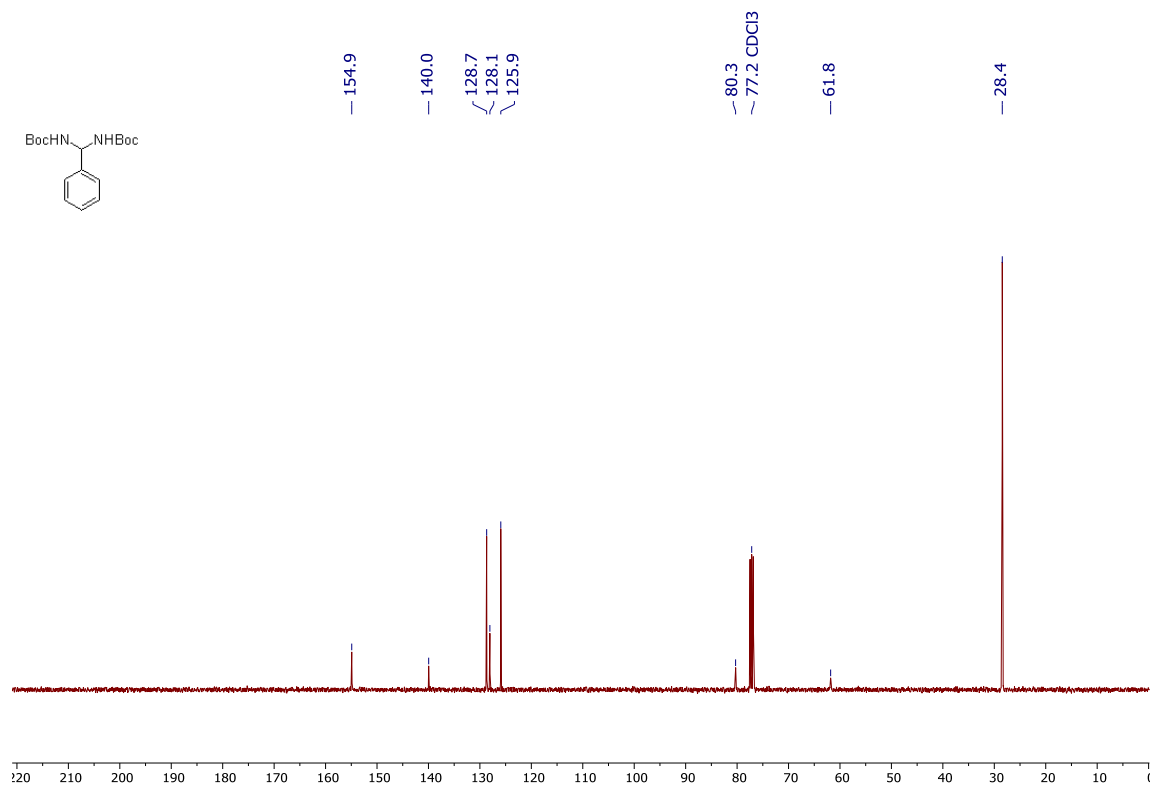

**<sup>1</sup>H NMR spectrum of compound 2b (CDCl<sub>3</sub>, 400 MHz)**

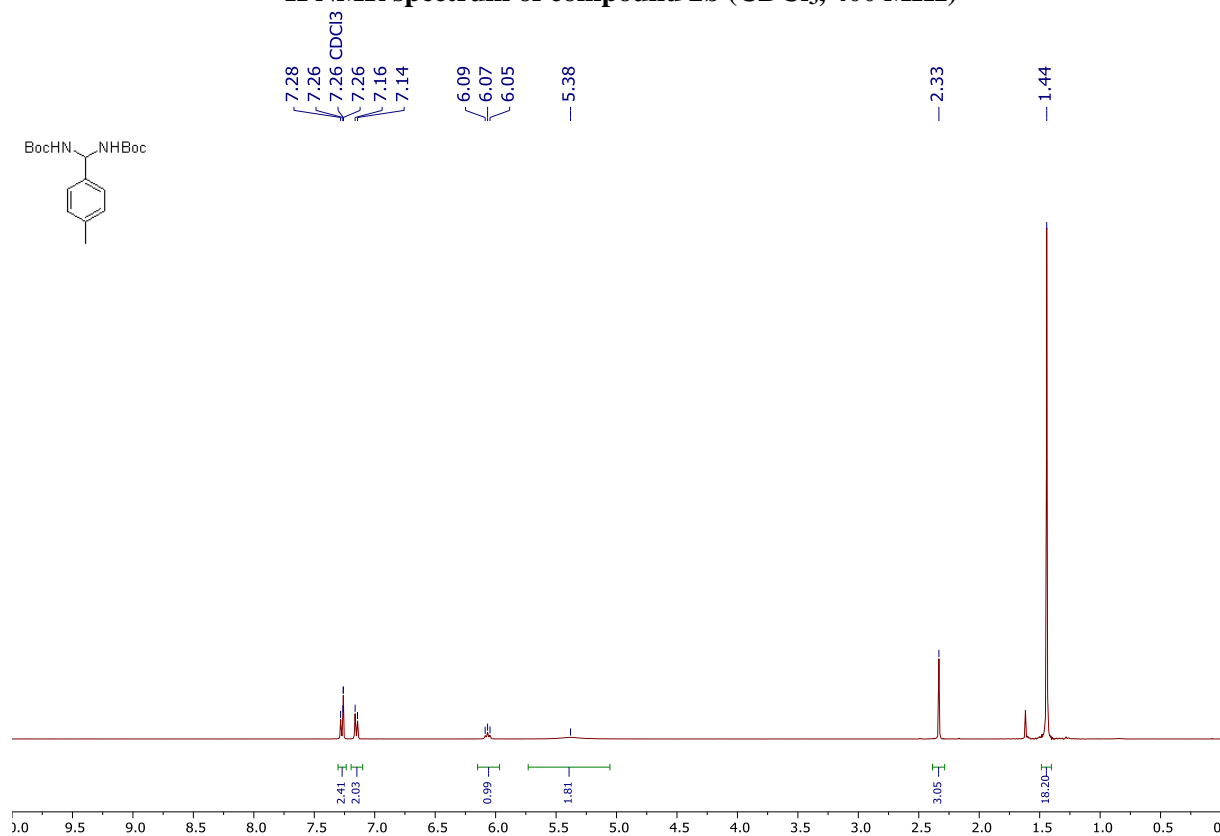

**<sup>13</sup>C NMR spectrum of compound 2b (CDCl<sub>3</sub>, 100 MHz)**

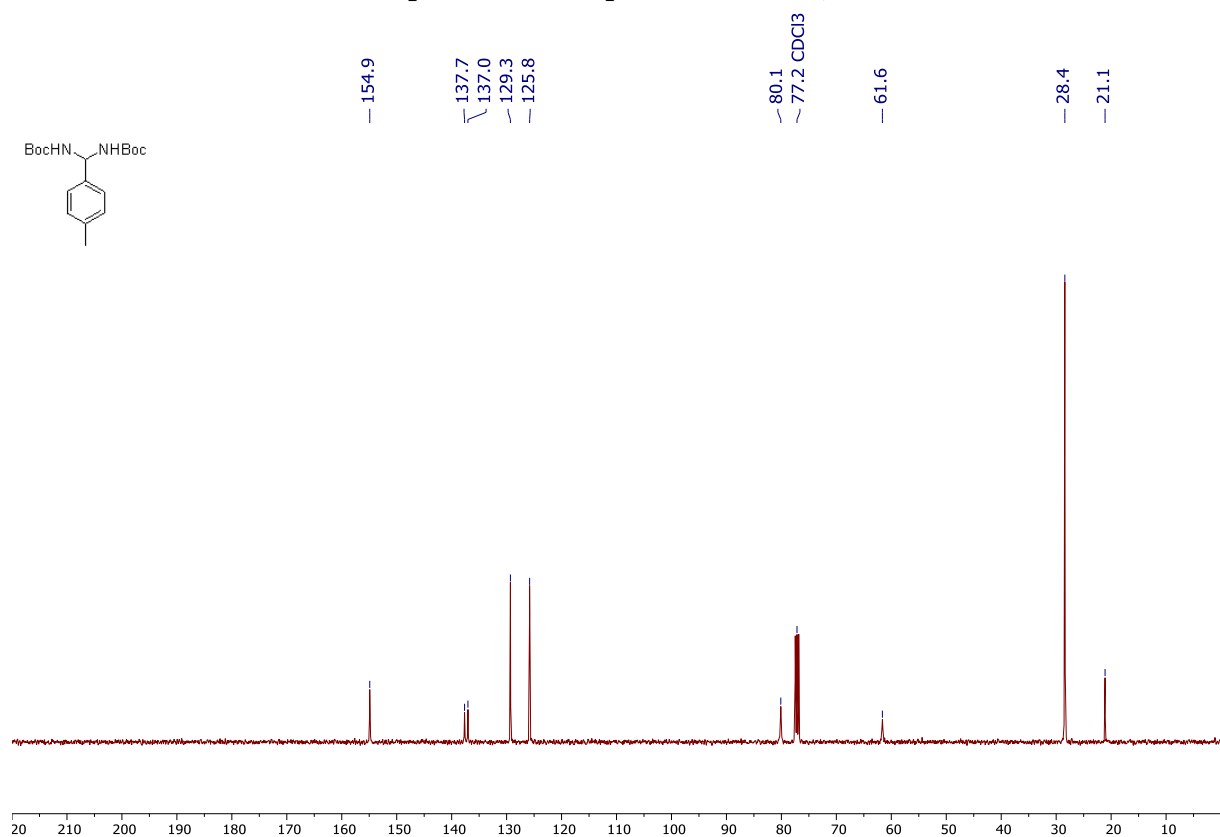

**<sup>1</sup>H NMR spectrum of compound 2c (CDCl<sub>3</sub>, 400 MHz)**

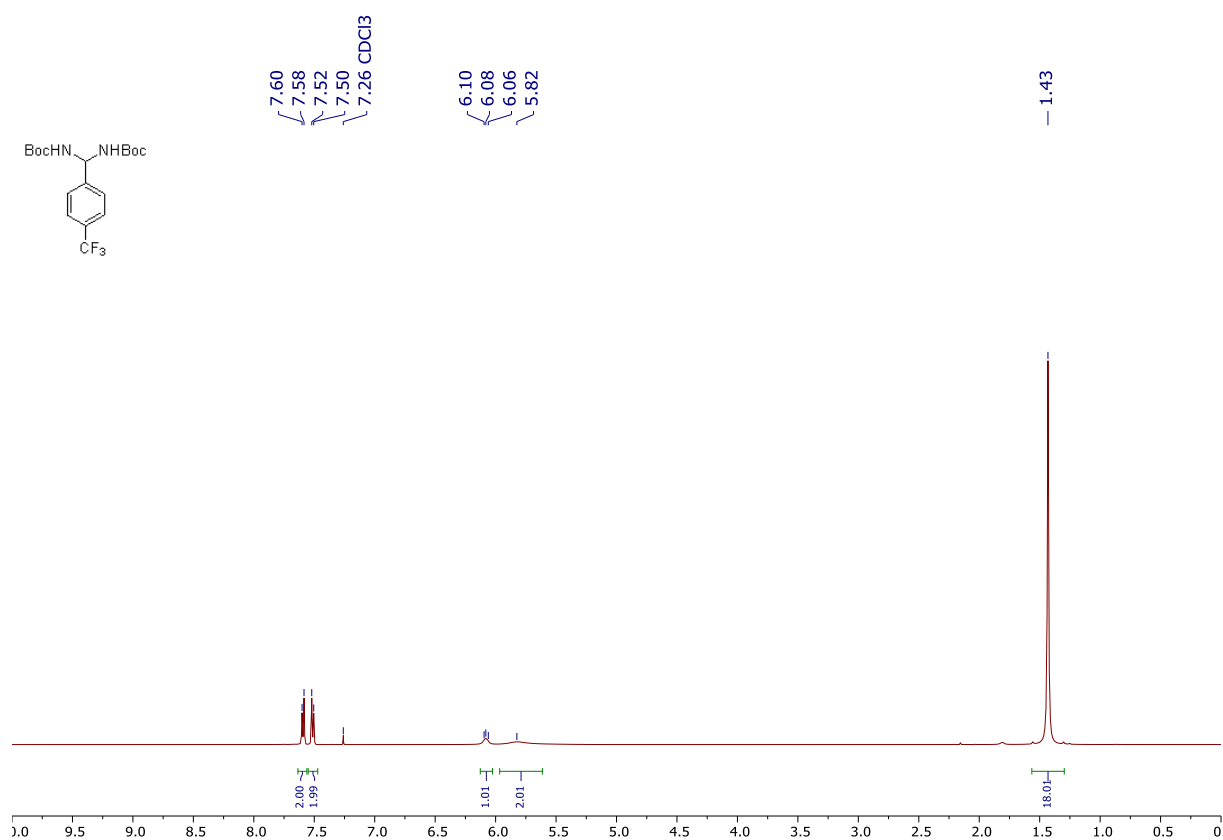

**<sup>13</sup>C NMR spectrum of compound 2c (CDCl<sub>3</sub>, 100 MHz)**

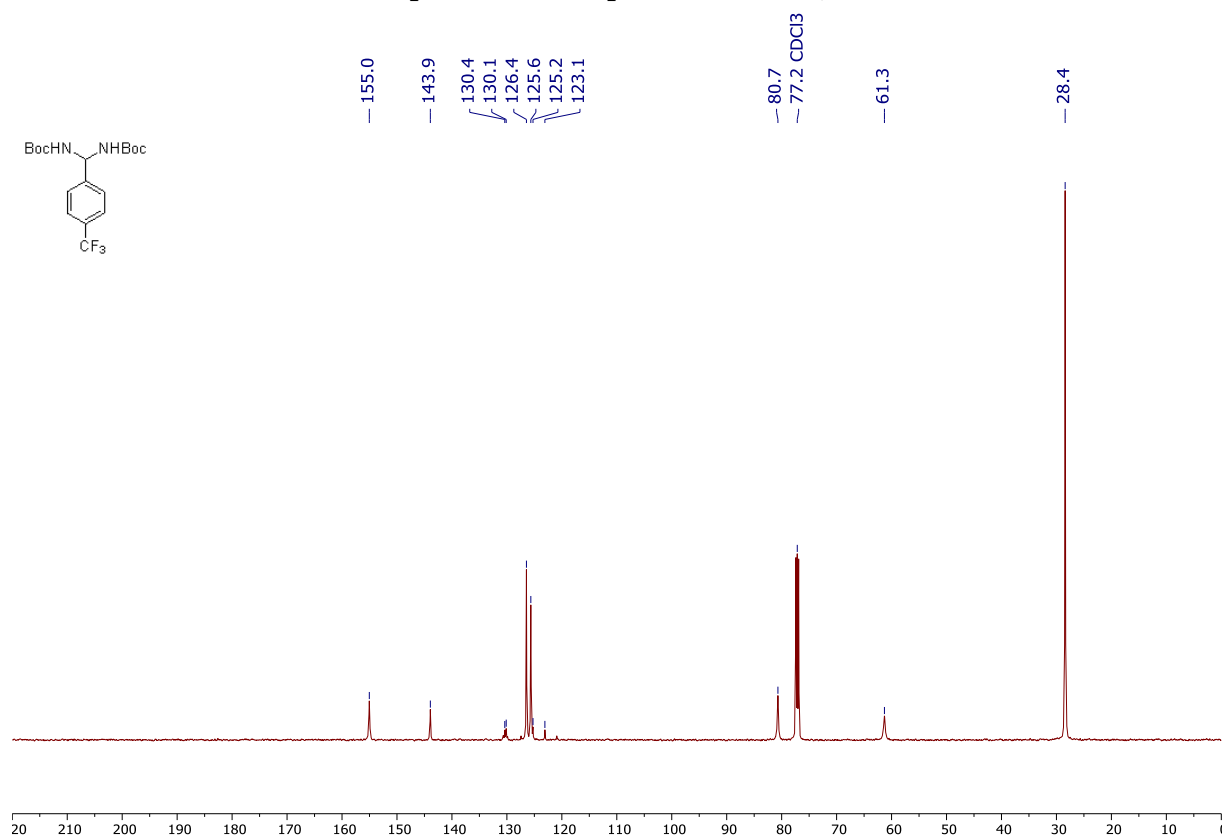

**$^{19}\text{F}$  NMR spectrum of compound 2c ( $\text{CDCl}_3$ , 376 MHz)**

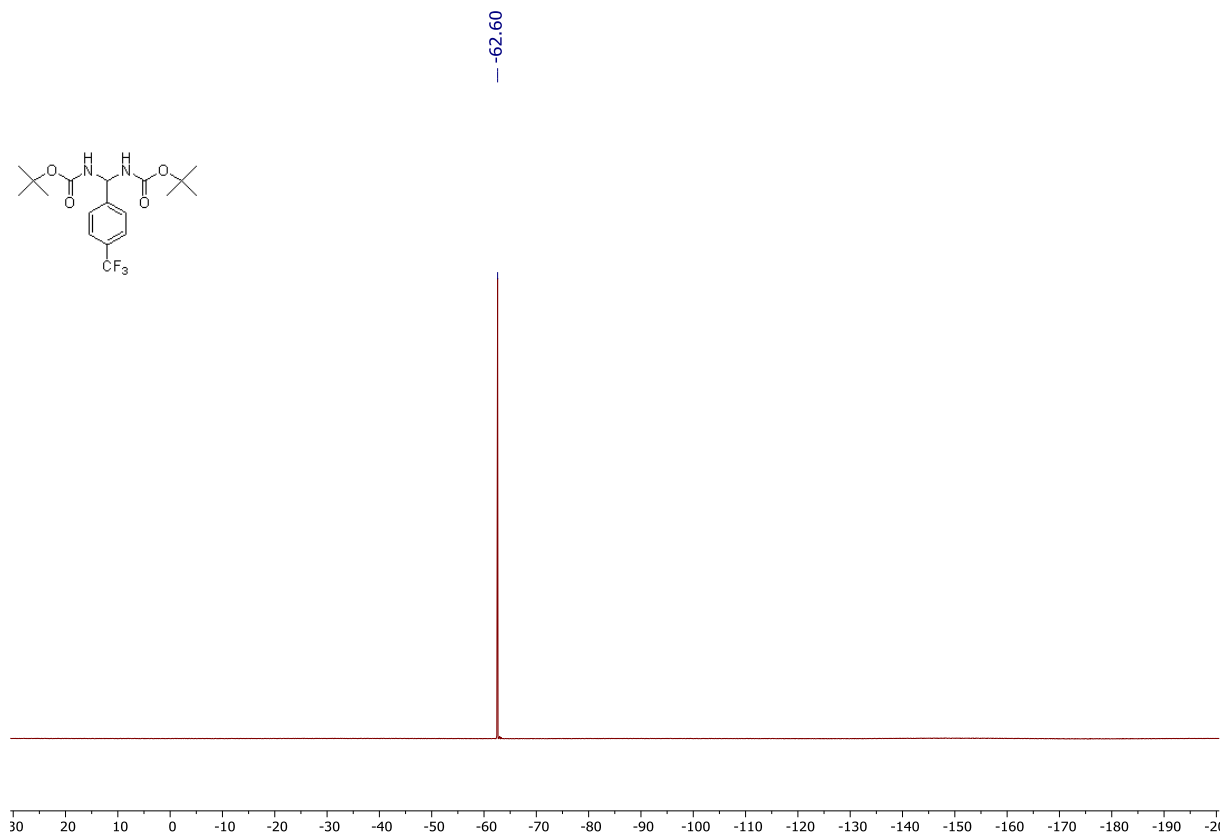

**<sup>1</sup>H NMR spectrum of compound 2d (CDCl<sub>3</sub>, 400 MHz)**

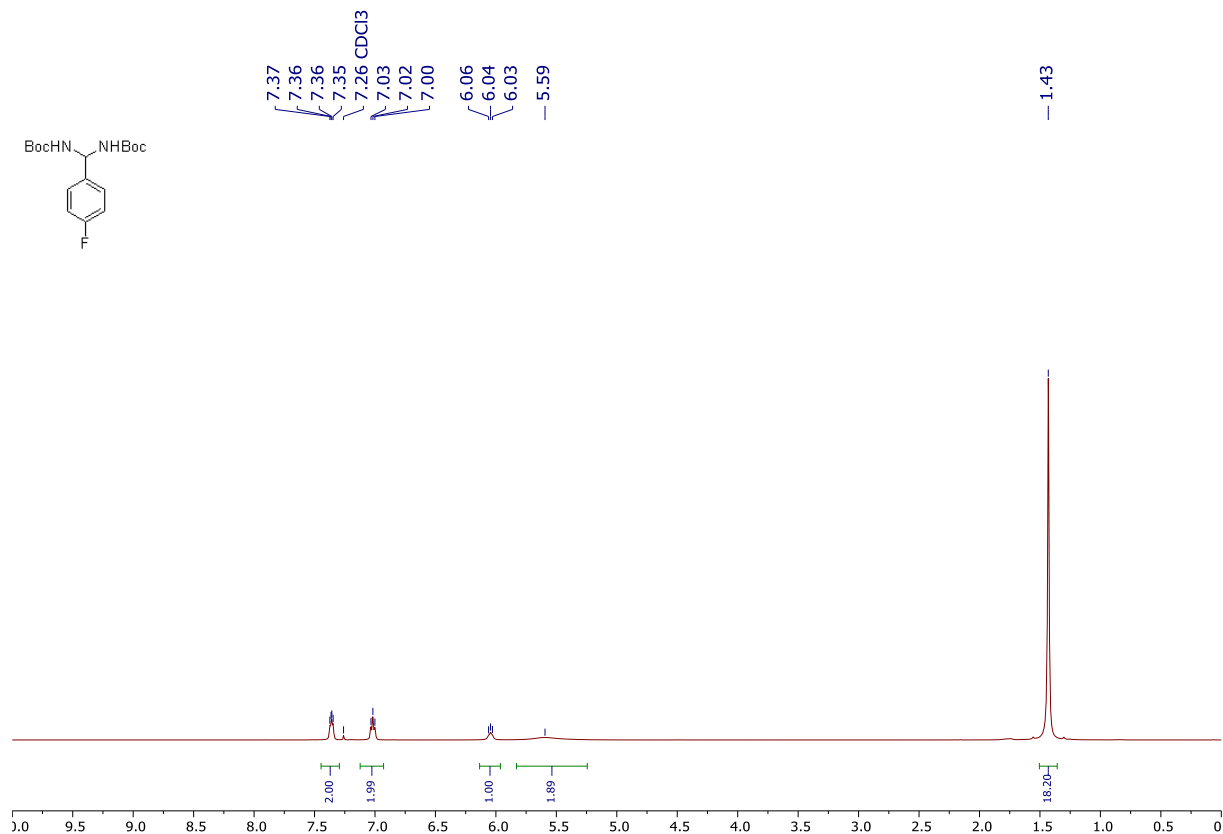

**<sup>13</sup>C NMR spectrum of compound 2d (CDCl<sub>3</sub>, 100 MHz)**

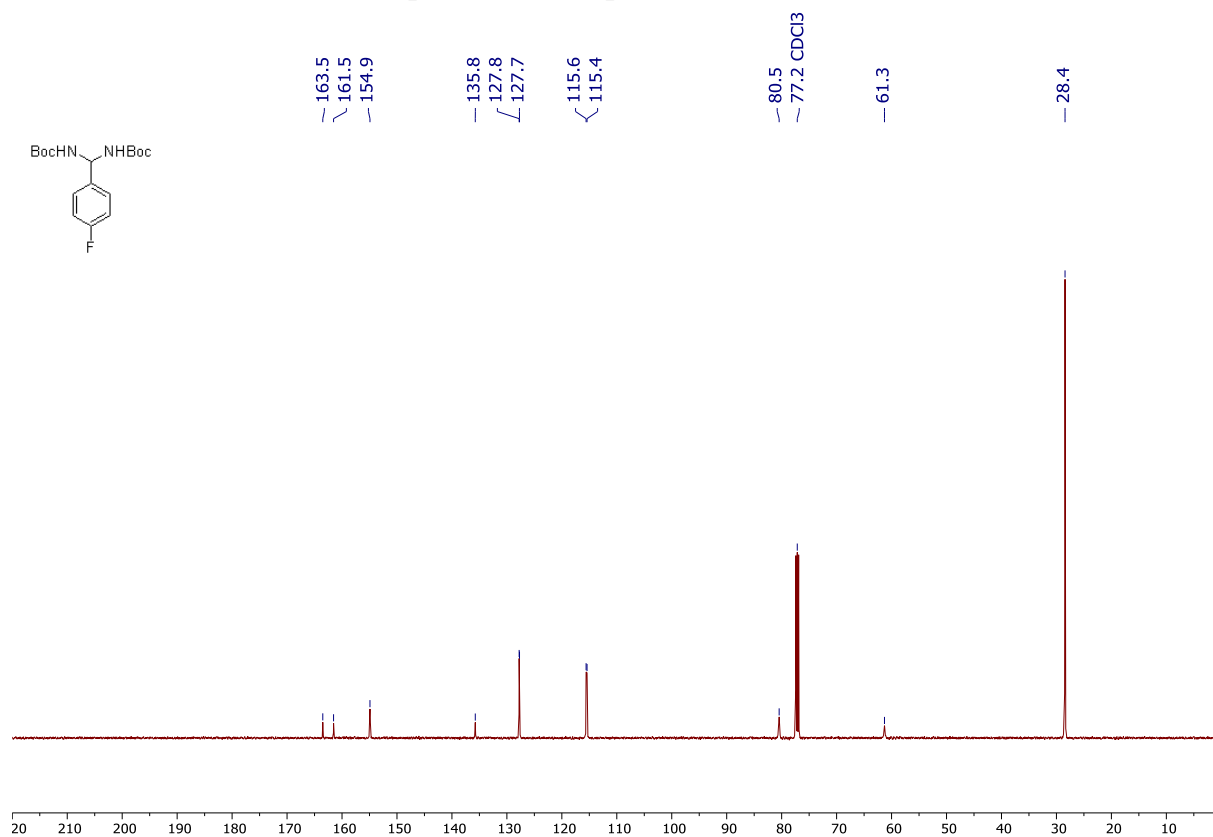

**$^{19}\text{F}$  NMR spectrum of compound 2d ( $\text{CDCl}_3$ , 376 MHz)**

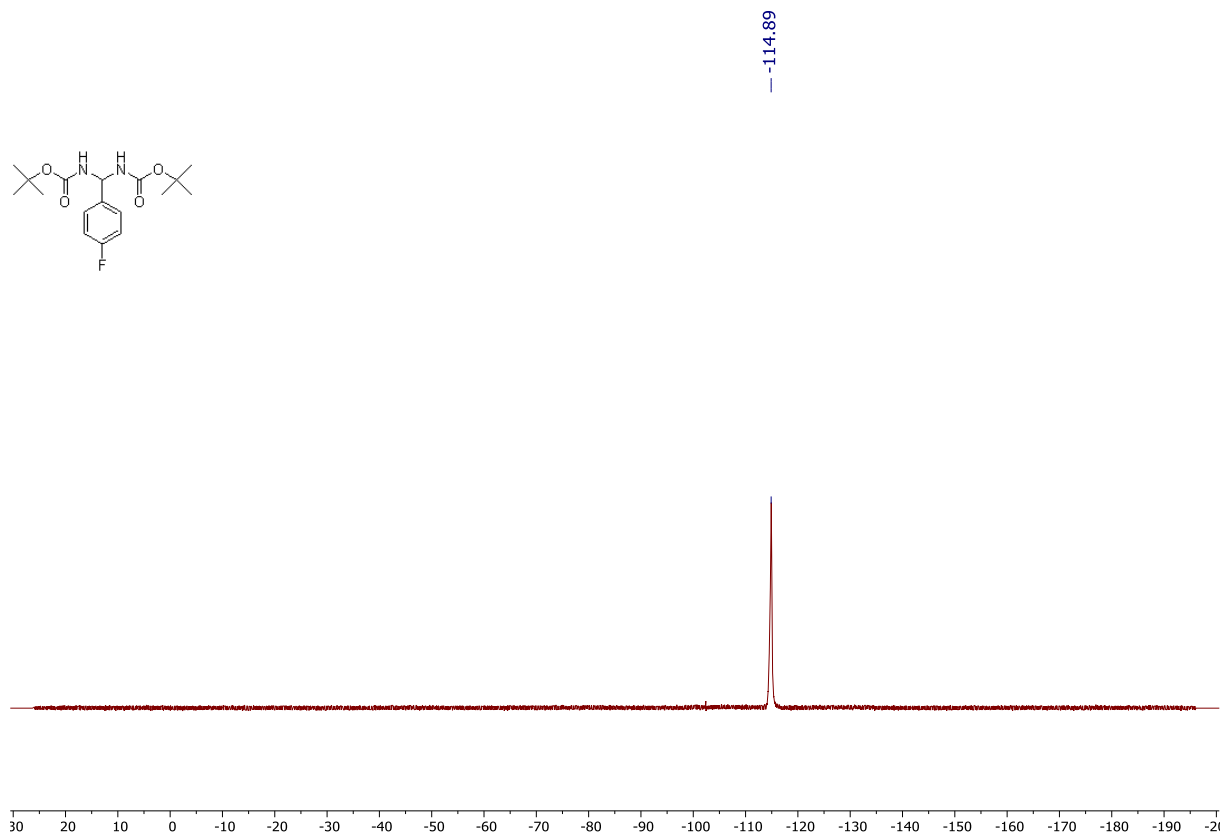

**<sup>1</sup>H NMR spectrum of compound 2e (CDCl<sub>3</sub>, 200 MHz)**

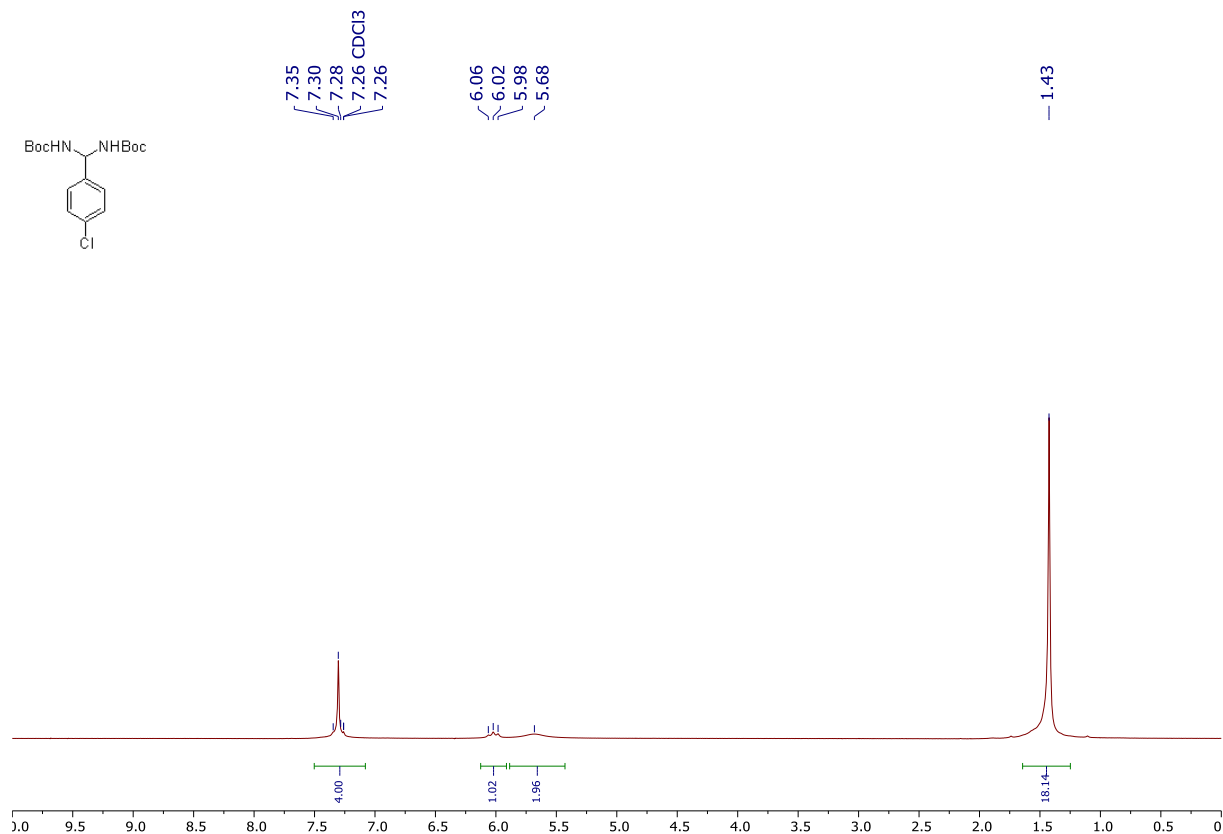

**<sup>13</sup>C NMR spectrum of compound 2e (CDCl<sub>3</sub>, 50 MHz)**

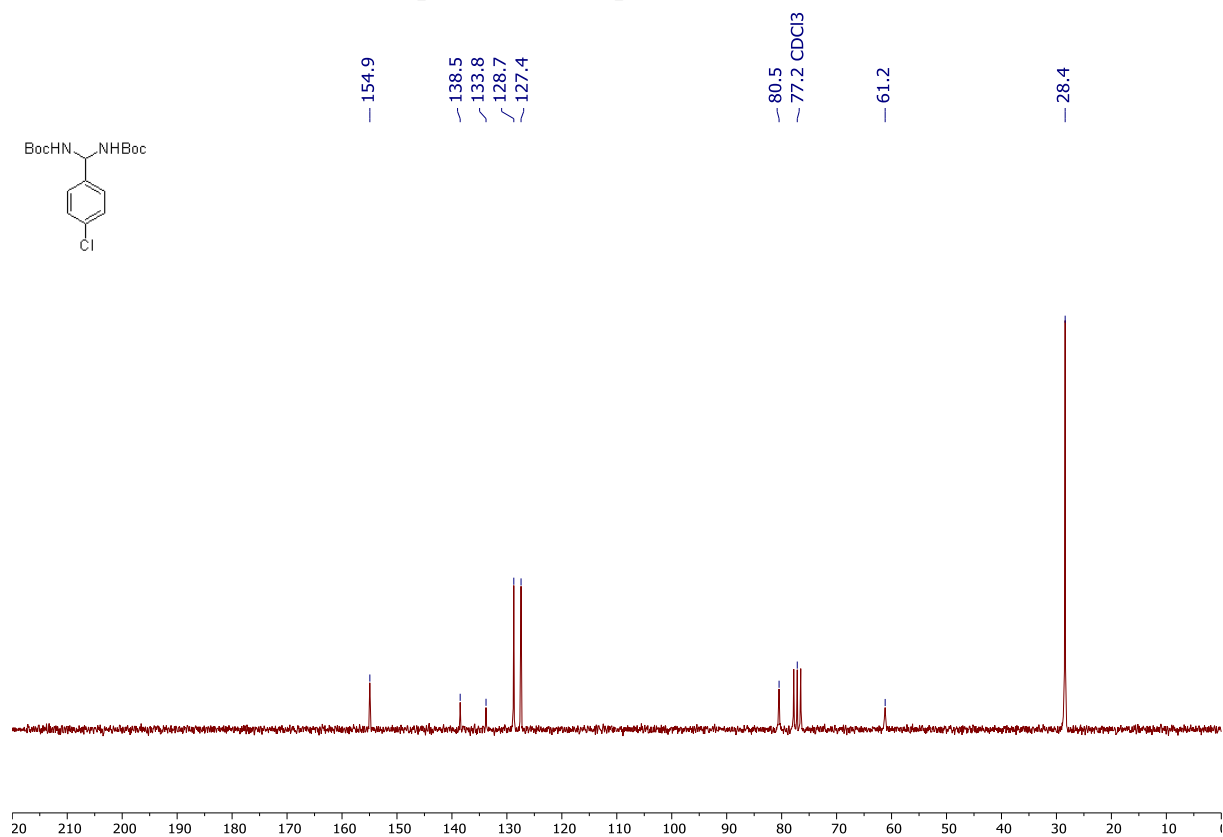

**$^1\text{H}$  NMR spectrum of compound 2f ( $\text{CDCl}_3$ , 400 MHz)**

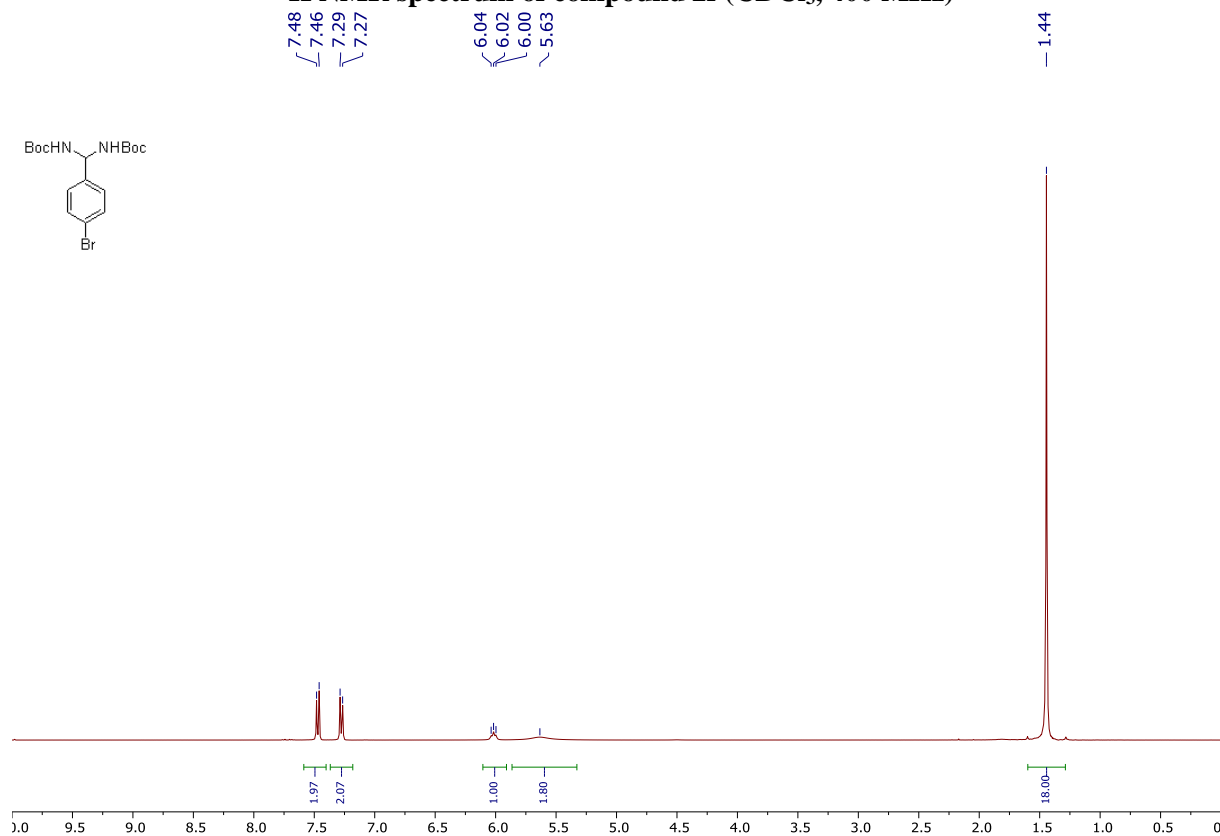

**$^{13}\text{C}$  NMR spectrum of compound 2f ( $\text{CDCl}_3$ , 100 MHz)**

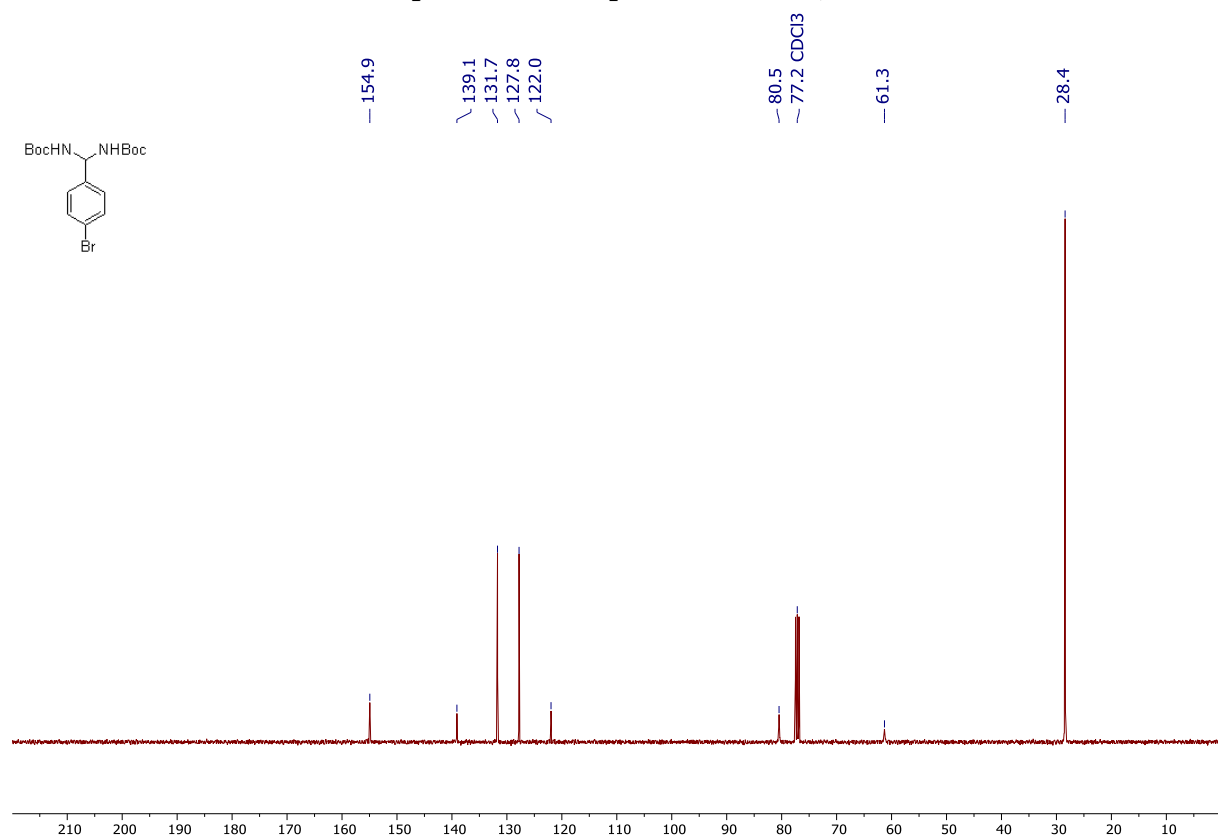



**<sup>1</sup>H NMR spectrum of compound 2g (CDCl<sub>3</sub>, 400 MHz)**

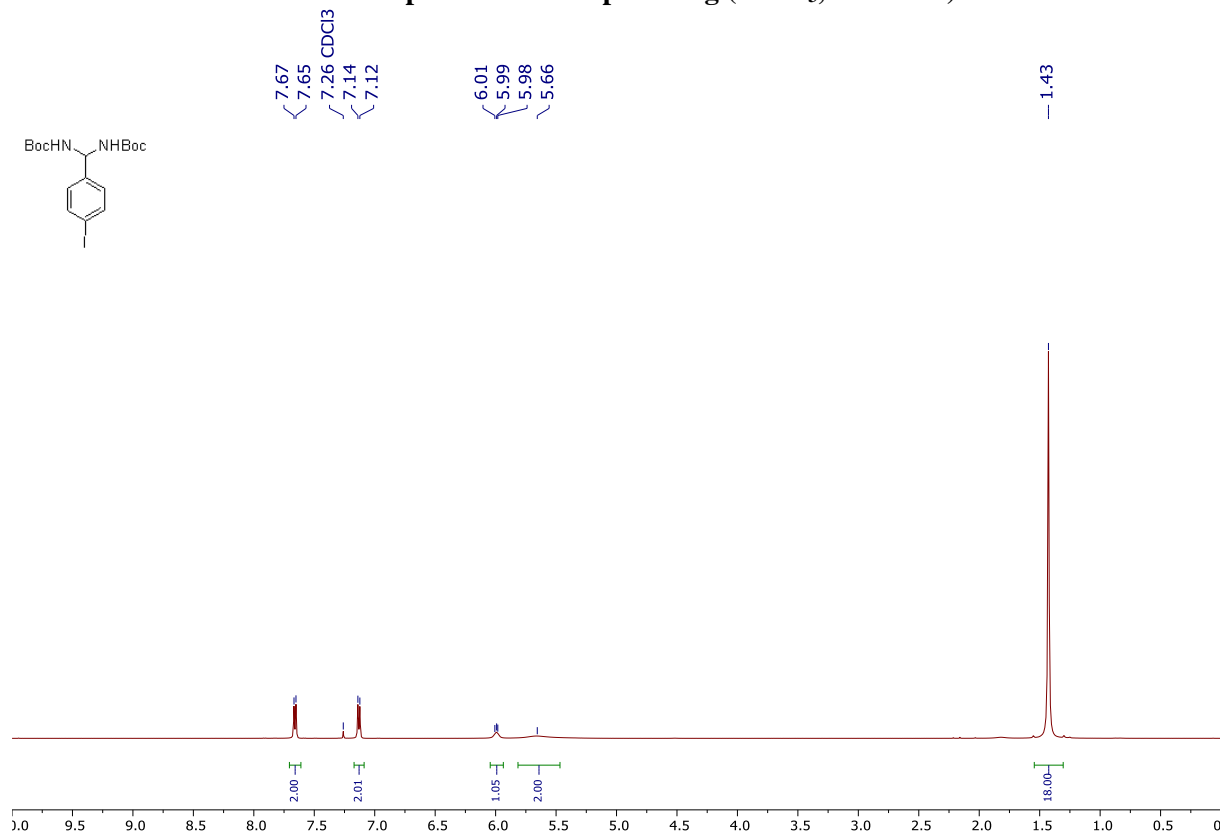

**<sup>13</sup>C NMR spectrum of compound 2g (CDCl<sub>3</sub>, 100 MHz)**

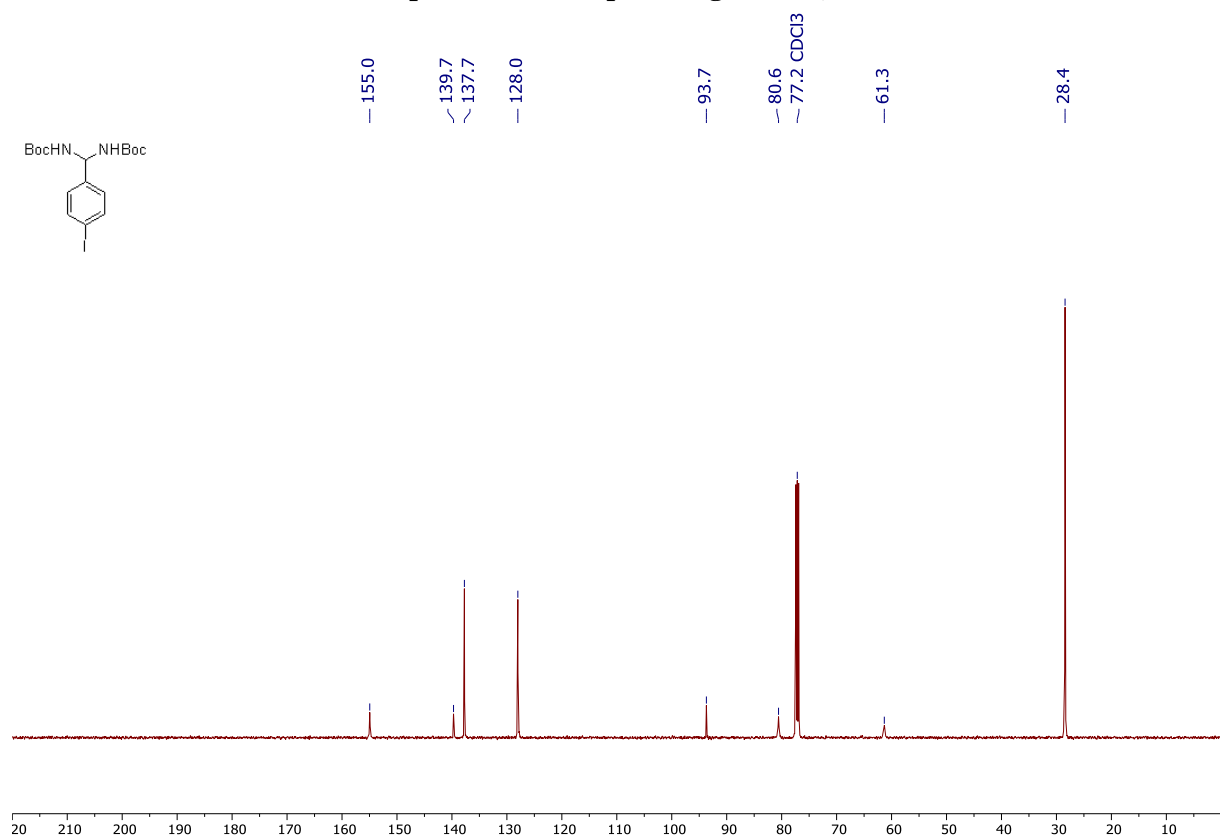

**<sup>1</sup>H NMR spectrum of compound 2h (CDCl<sub>3</sub>, 400 MHz)**

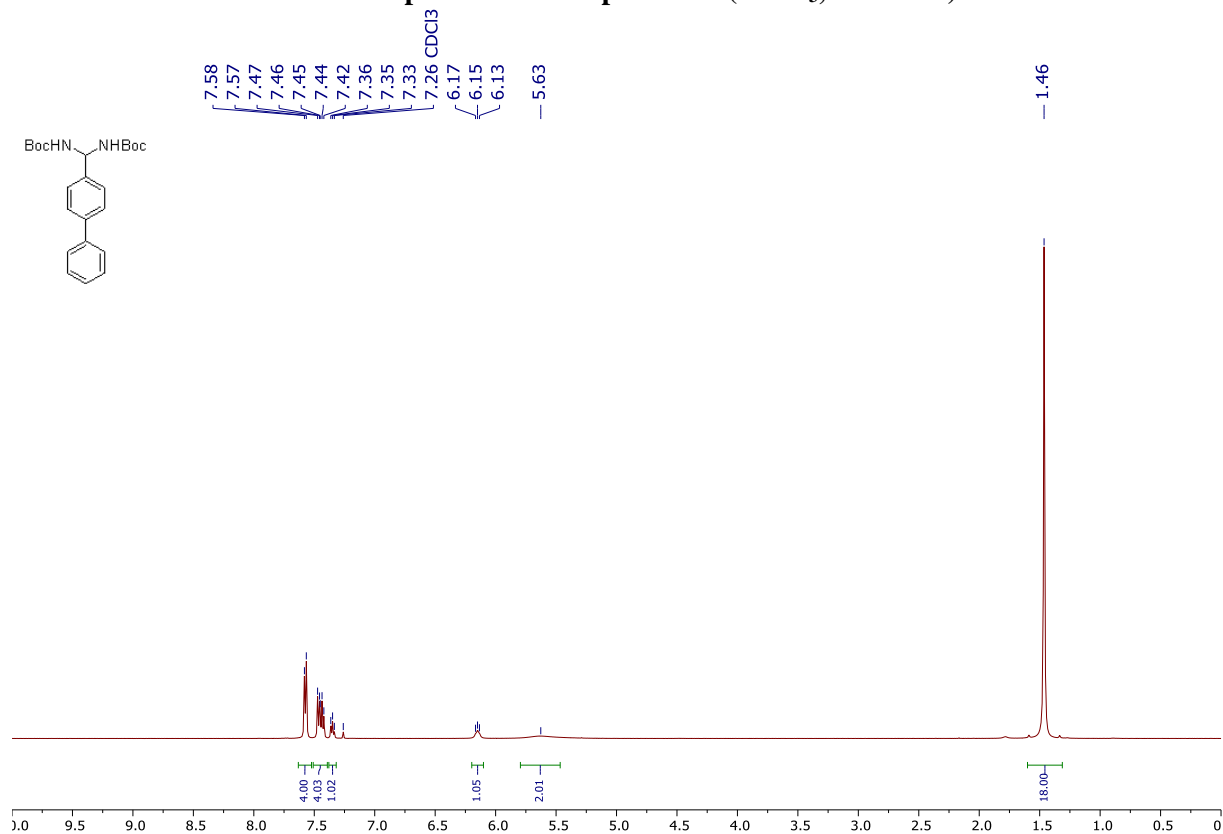

**<sup>13</sup>C NMR spectrum of compound 2h (CDCl<sub>3</sub>, 100 MHz)**

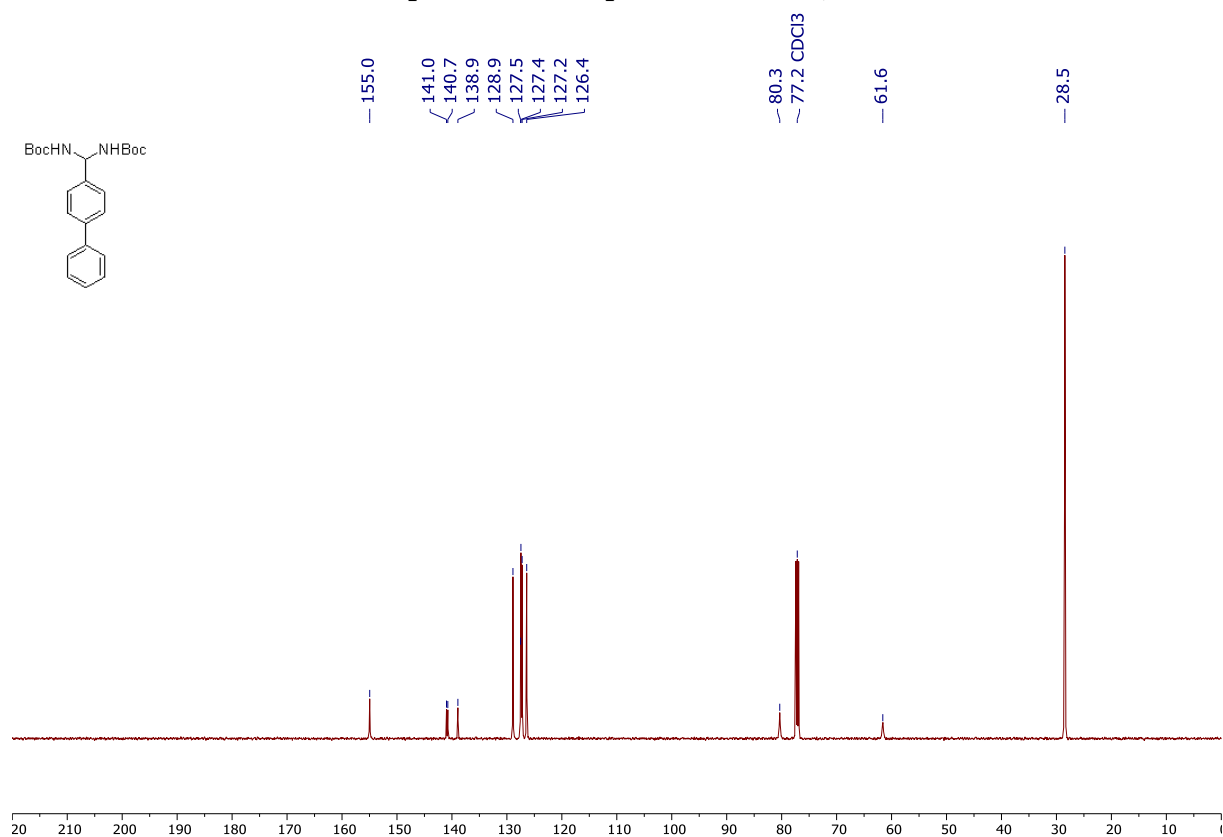

**<sup>1</sup>H NMR spectrum of compound 2i (CDCl<sub>3</sub>, 400 MHz)**

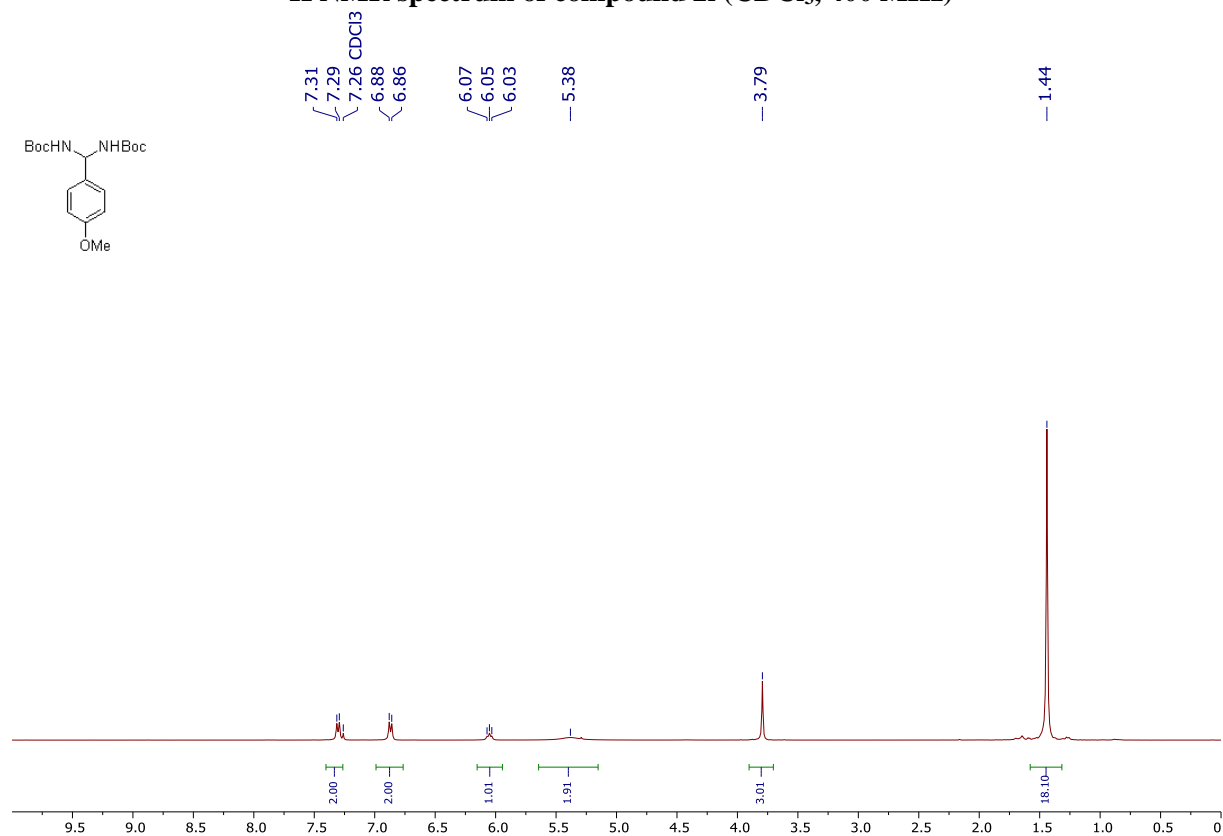

**<sup>13</sup>C NMR spectrum of compound 2i (CDCl<sub>3</sub>, 100 MHz)**

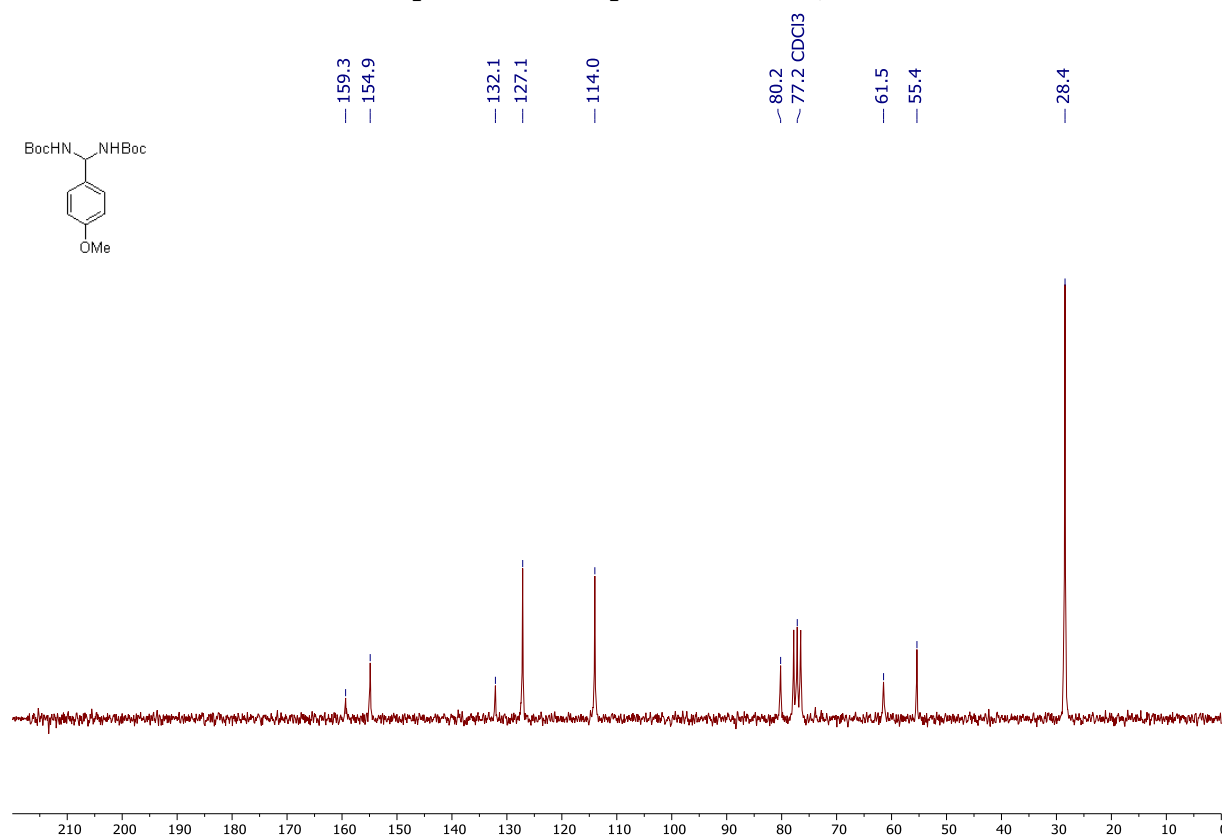

**<sup>1</sup>H NMR spectrum of compound 2j (CDCl<sub>3</sub>, 400 MHz)**

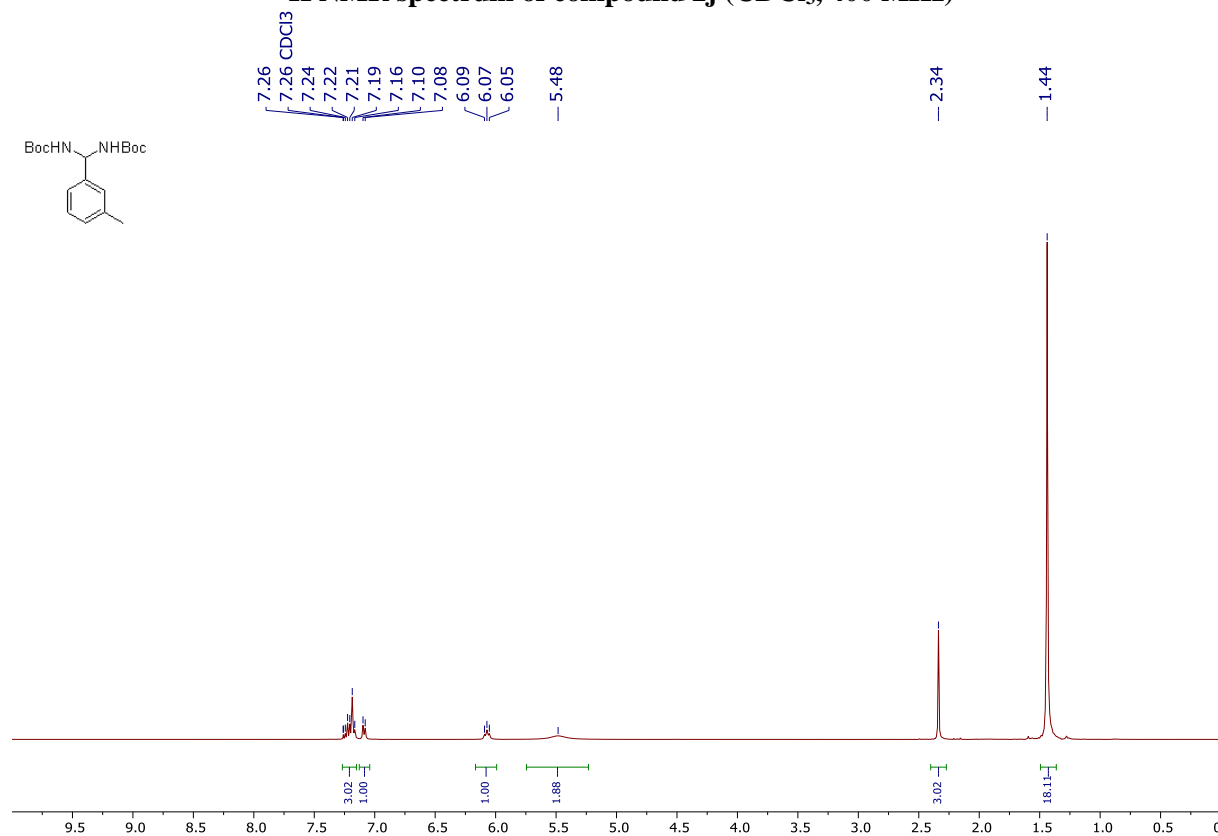

**<sup>13</sup>C NMR spectrum of compound 2j (CDCl<sub>3</sub>, 100 MHz)**

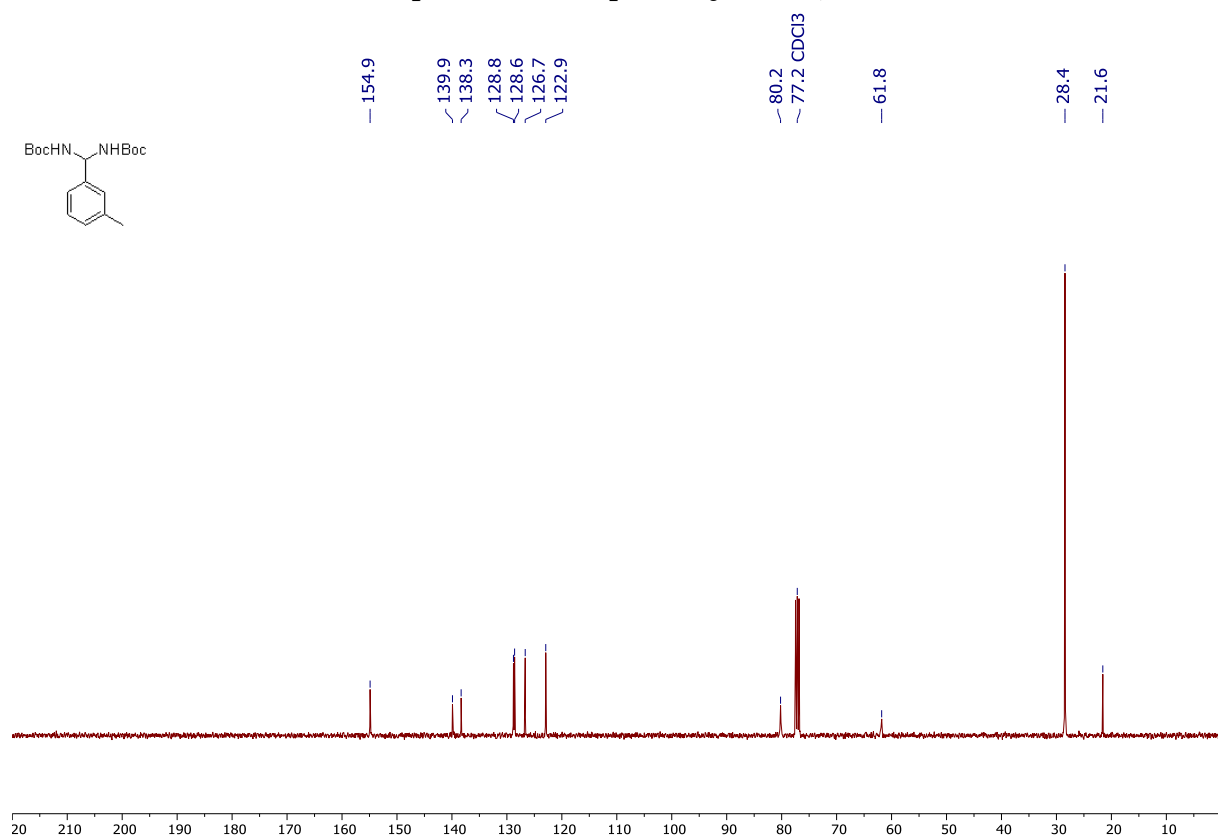

**<sup>1</sup>H NMR spectrum of compound 2k (CDCl<sub>3</sub>, 200 MHz)**

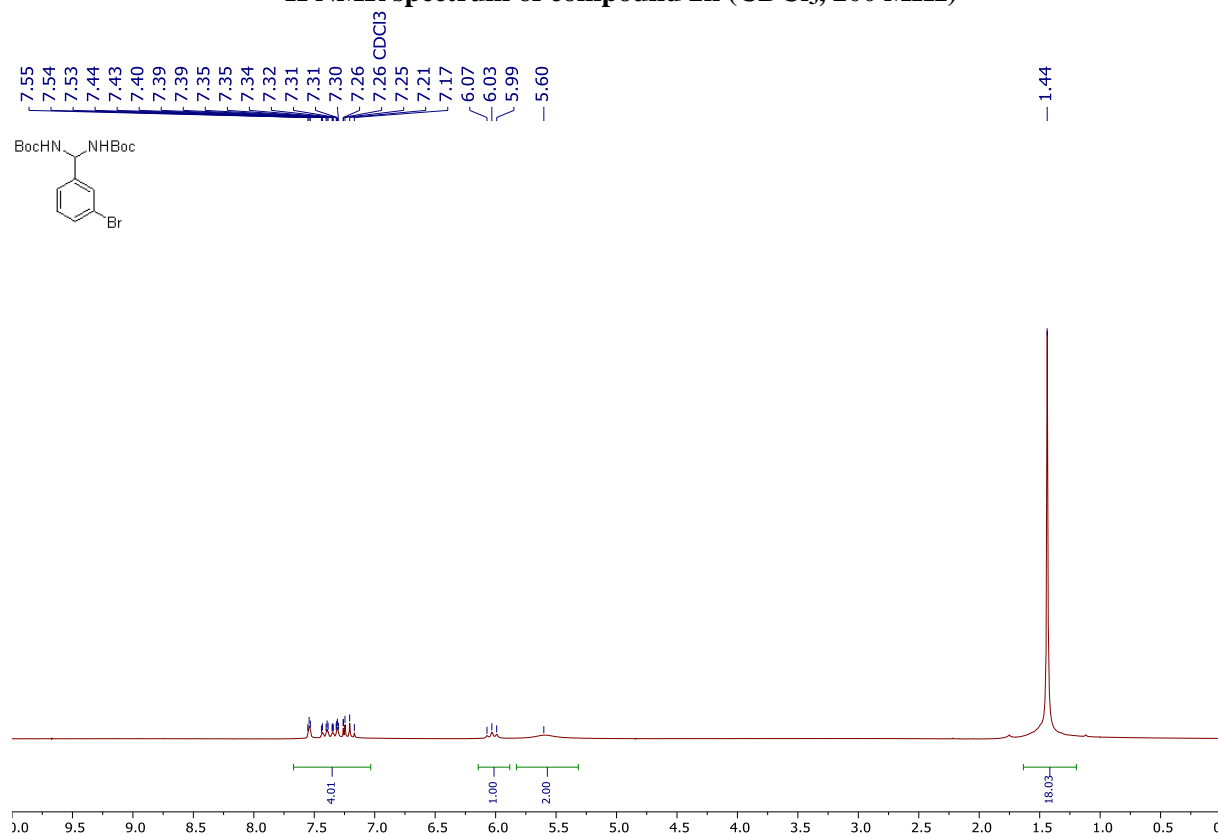

**<sup>13</sup>C NMR spectrum of compound 2k (CDCl<sub>3</sub>, 100 MHz)**

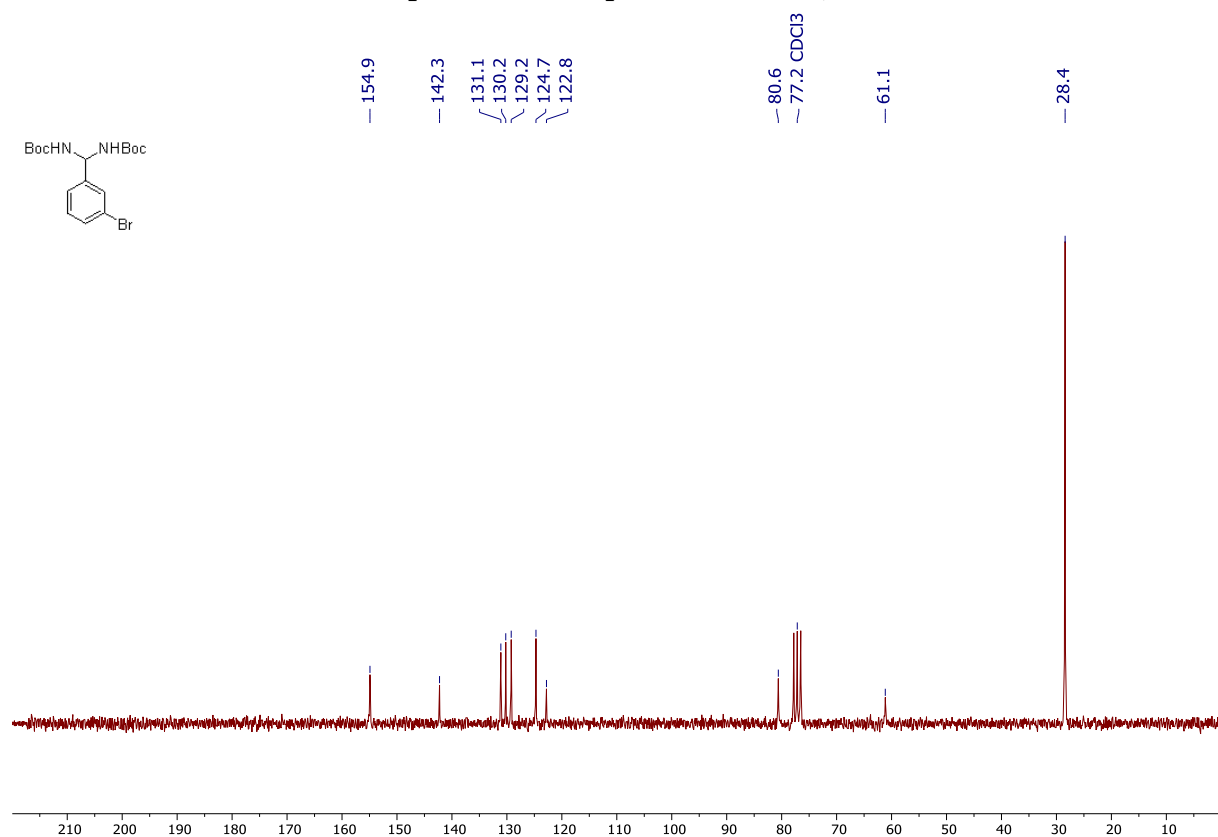

**<sup>1</sup>H NMR spectrum of compound 2l (CDCl<sub>3</sub>, 400 MHz)**

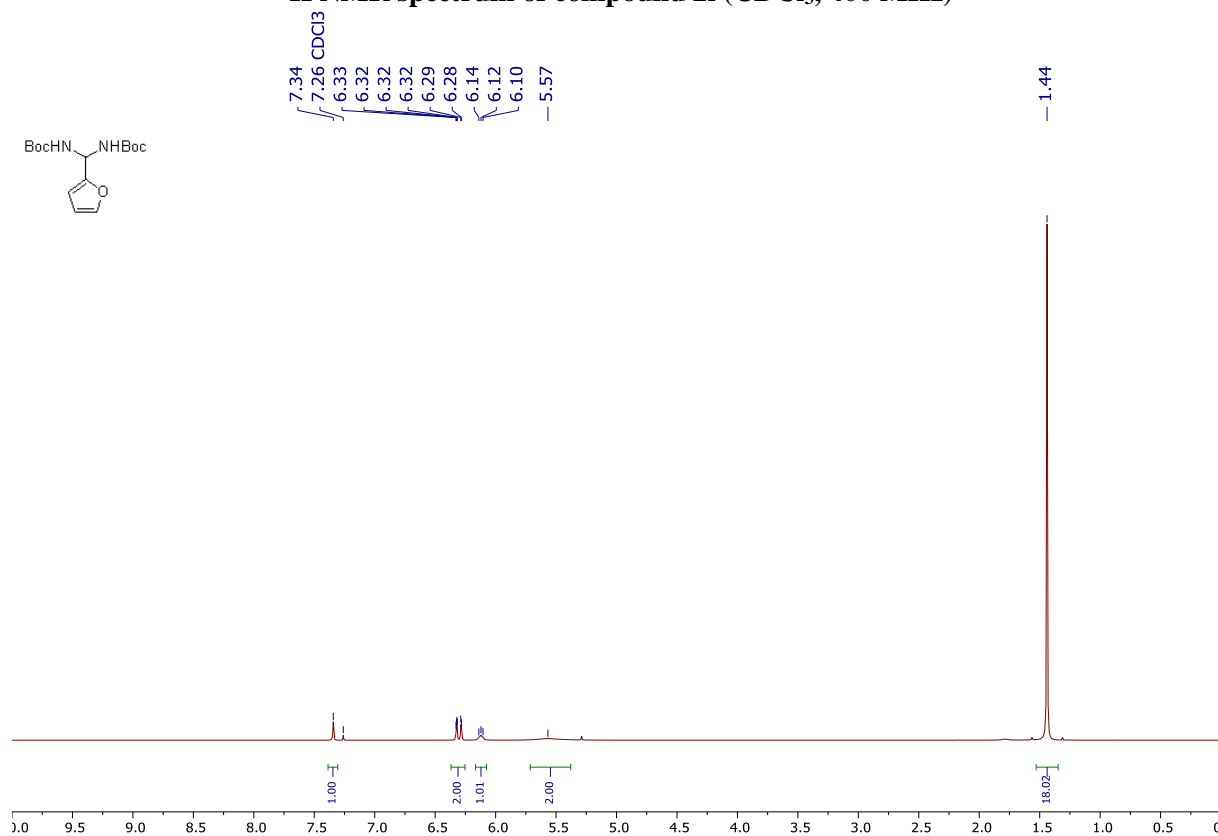

**<sup>13</sup>C NMR spectrum of compound 2l (CDCl<sub>3</sub>, 100 MHz)**

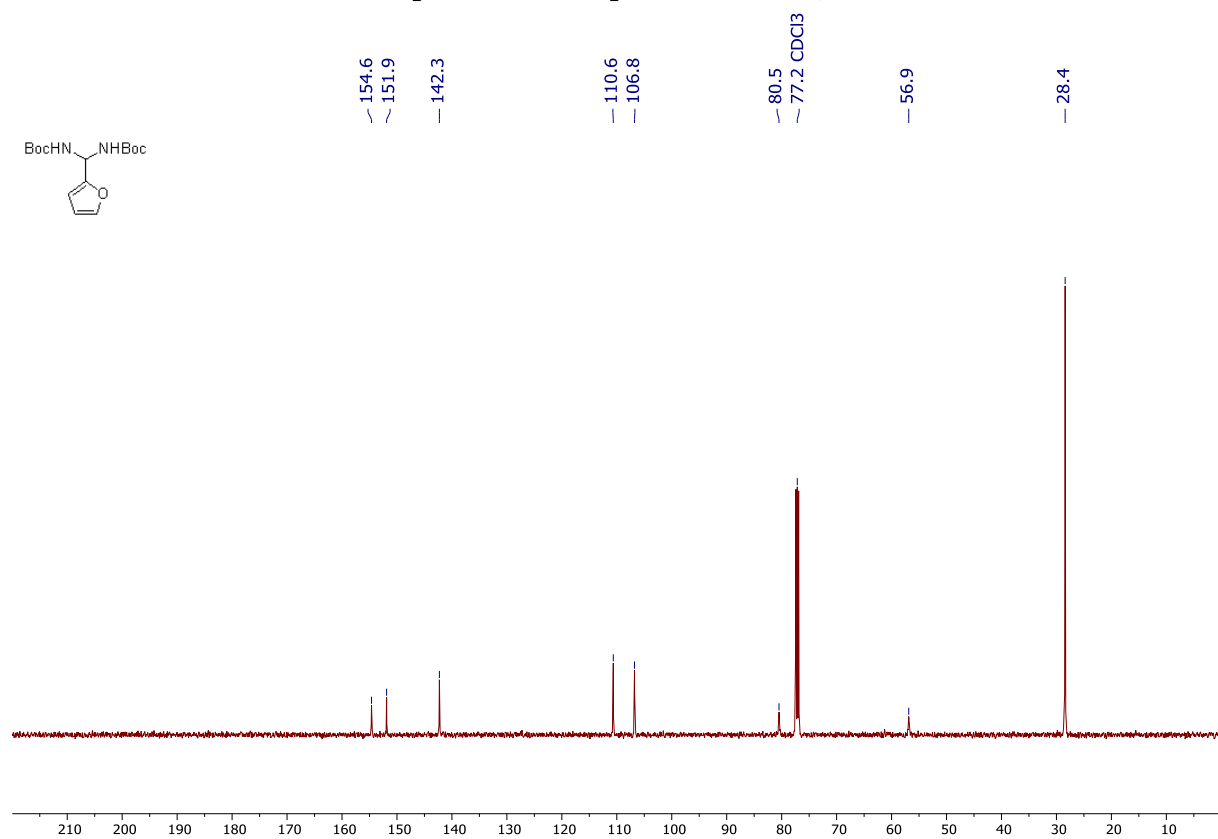

**<sup>1</sup>H NMR spectrum of compound 2m (CDCl<sub>3</sub>, 400 MHz)**

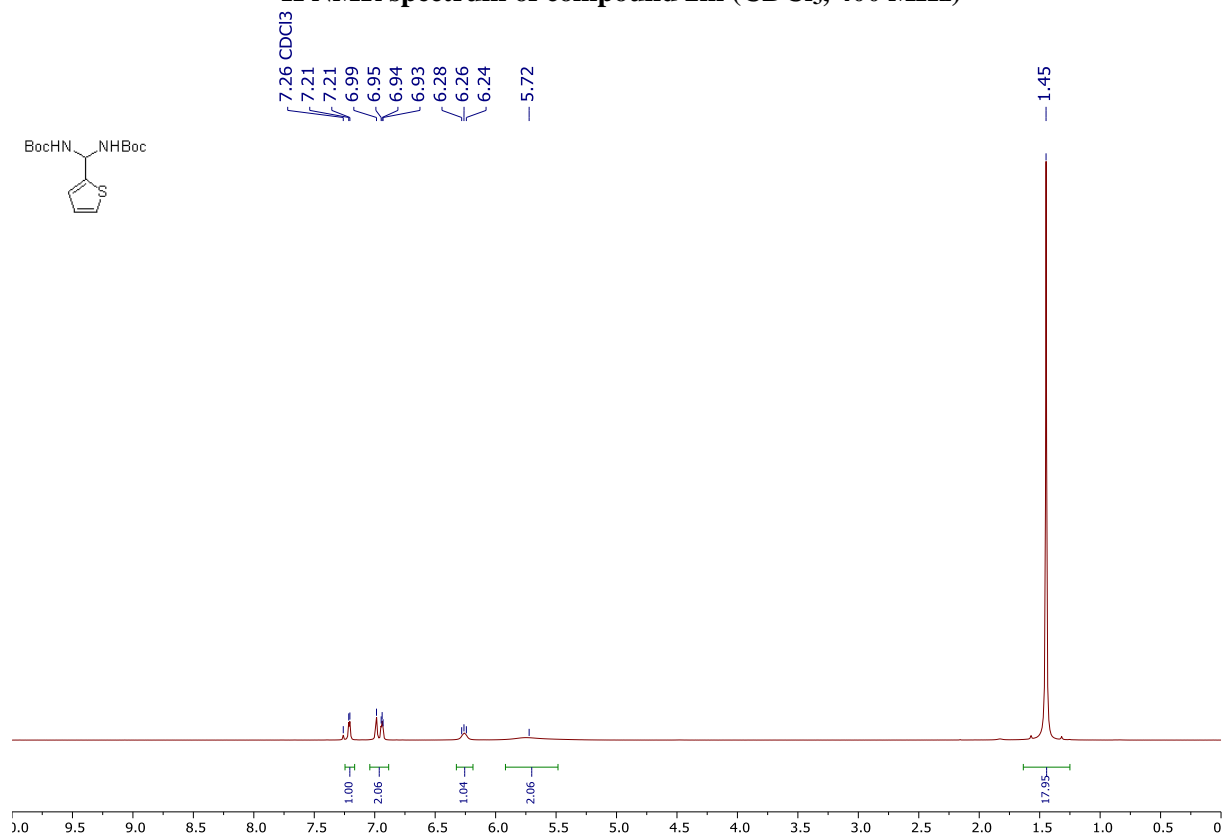

**<sup>13</sup>C NMR spectrum of compound 2m (CDCl<sub>3</sub>, 100 MHz)**

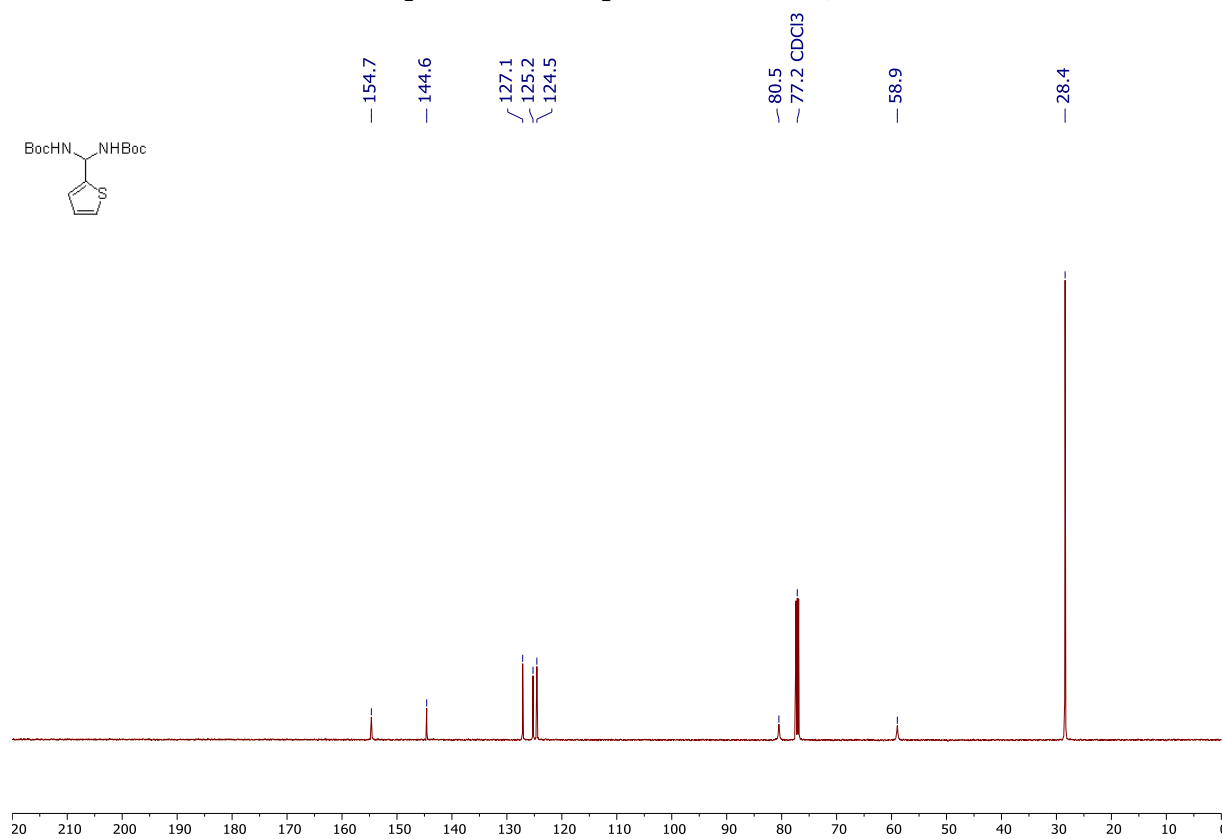

## 6.4. *N*-Cbz amins 5a-k

<sup>1</sup>H NMR spectrum of compound 5a (CDCl<sub>3</sub>, 400 MHz)

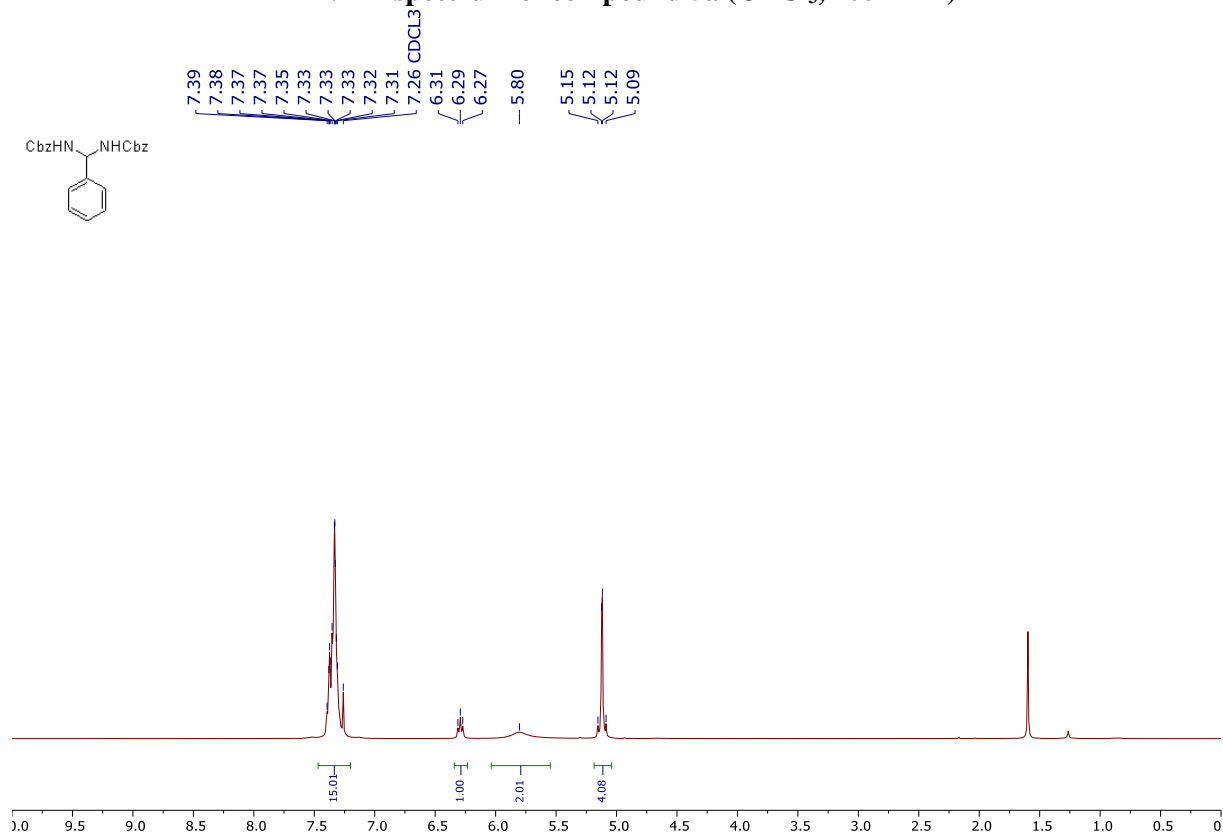

<sup>13</sup>C NMR spectrum of compound 5a (CDCl<sub>3</sub>, 100 MHz)

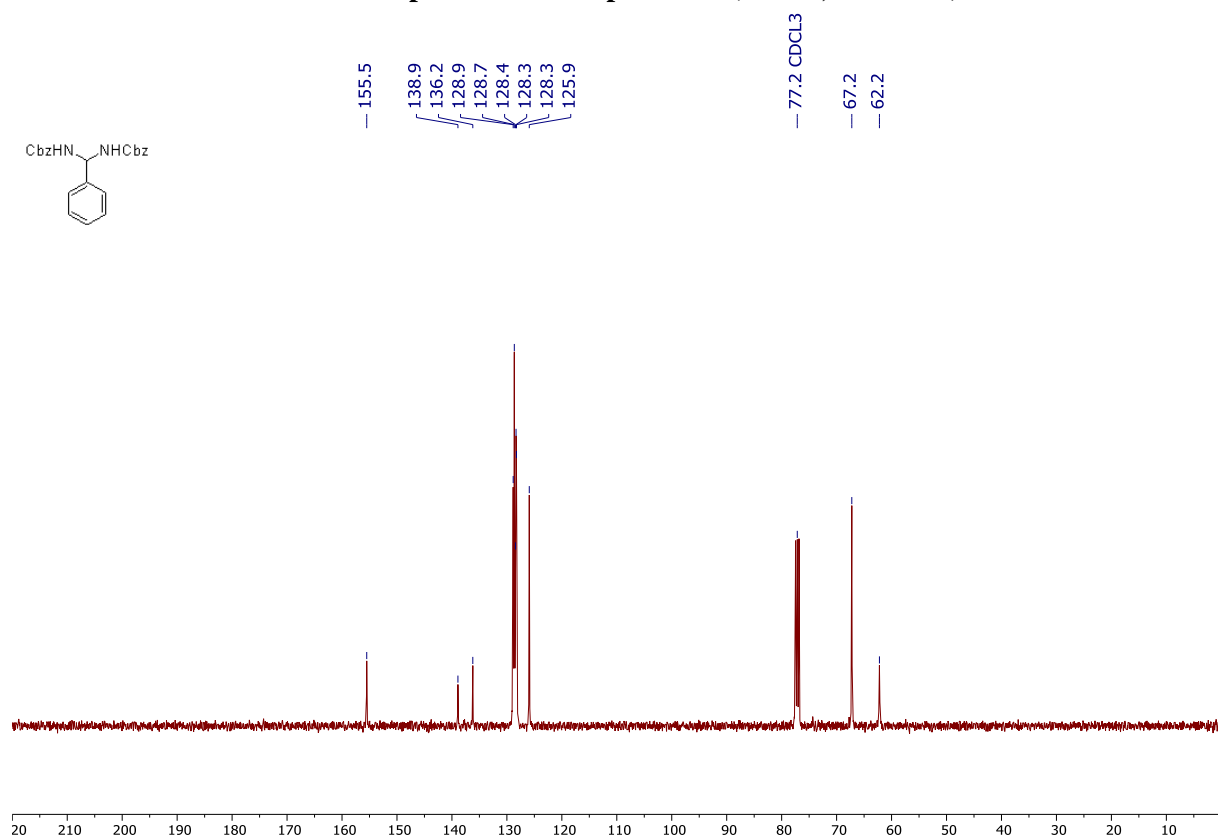



**<sup>1</sup>H NMR spectrum of compound 5b (CDCl<sub>3</sub>, 400 MHz)**

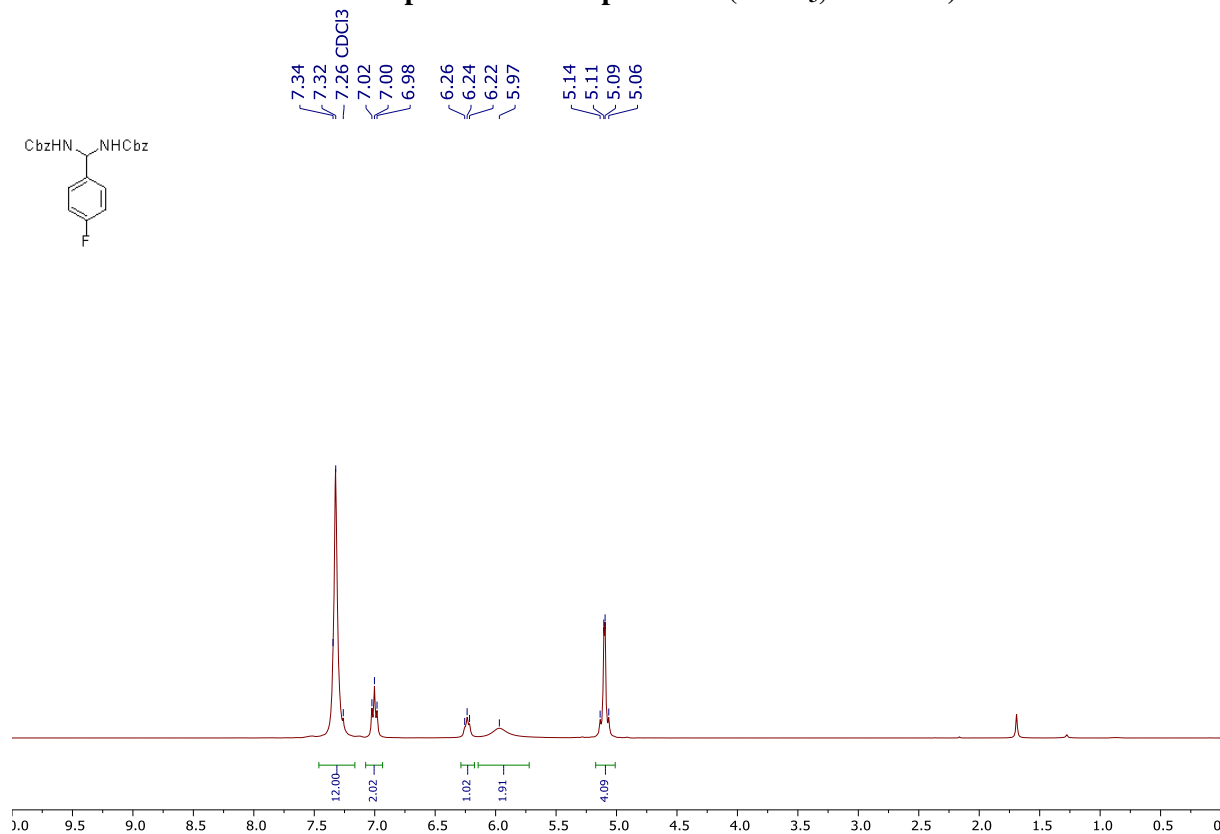

**<sup>13</sup>C NMR spectrum of compound 5b (CDCl<sub>3</sub>, 100 MHz)**

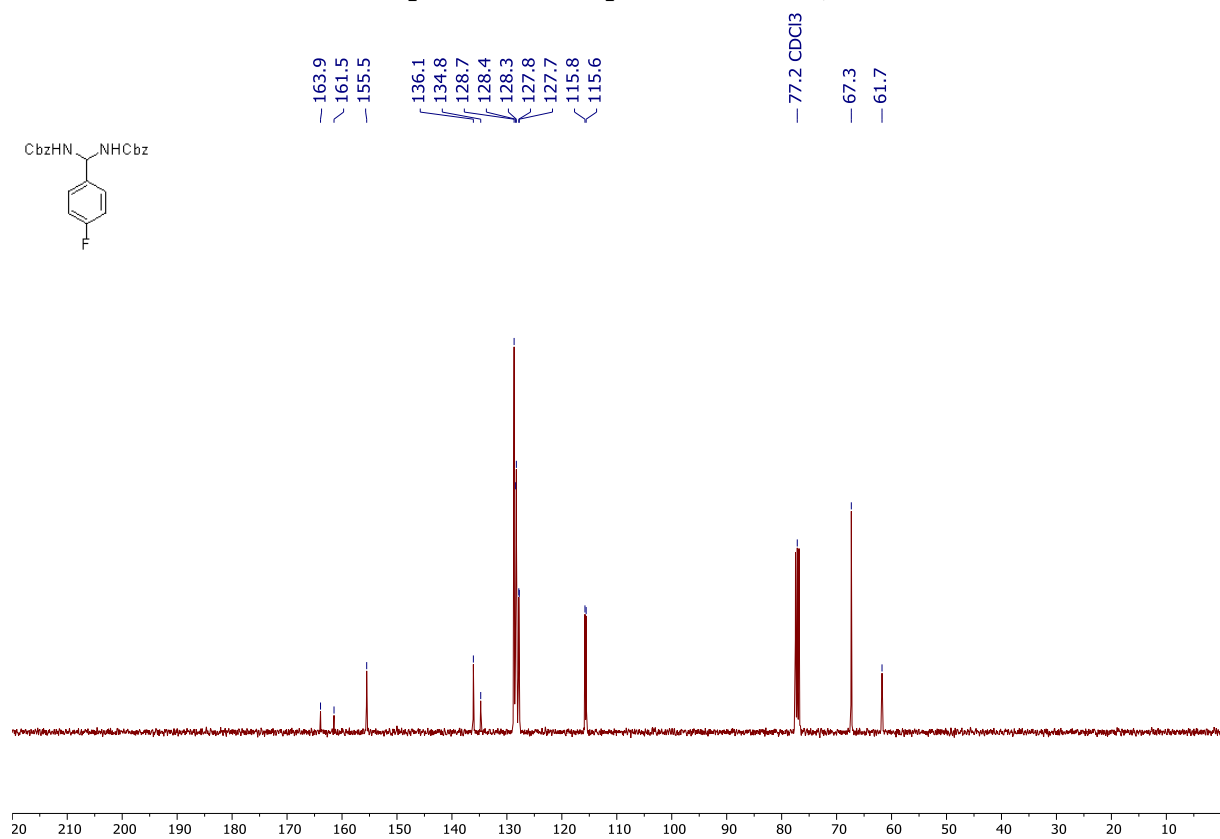

**$^{19}\text{F}$  NMR spectrum of compound 5b ( $\text{CDCl}_3$ , 376 MHz)**

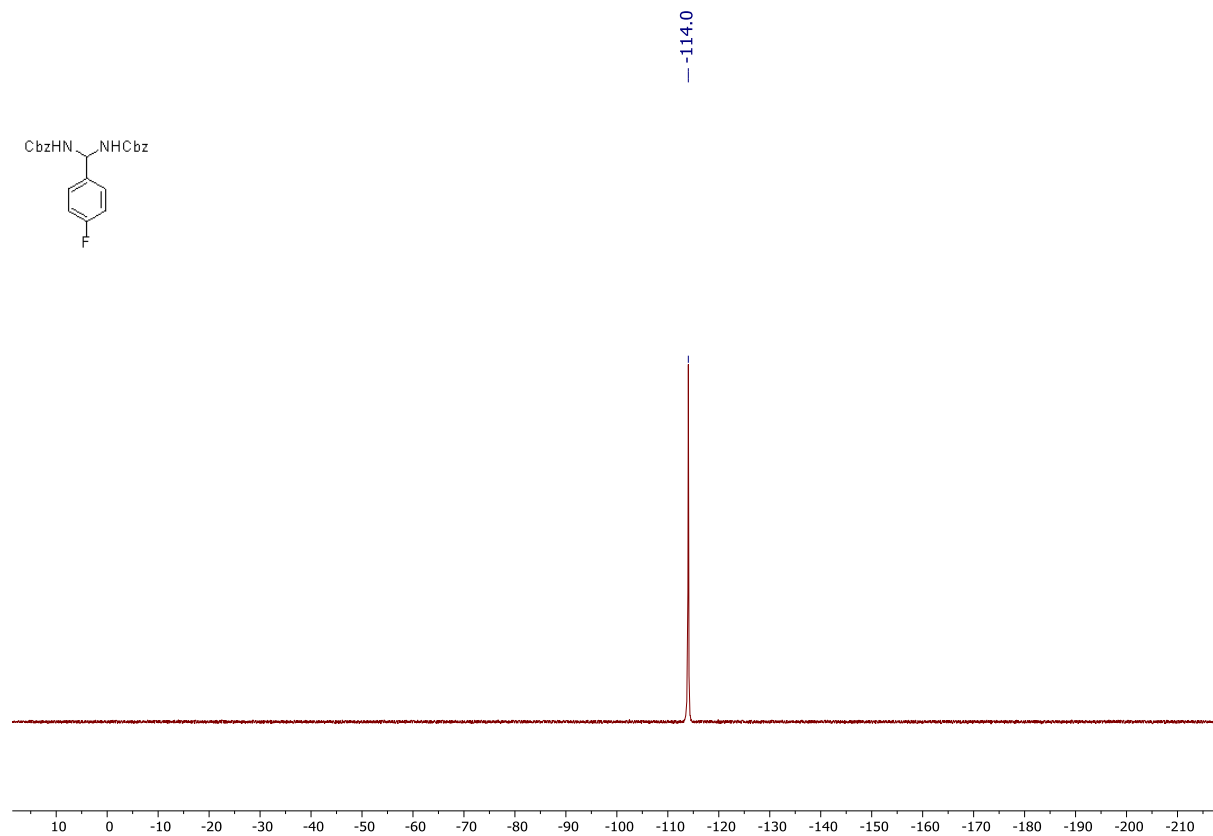

**<sup>1</sup>H NMR spectrum of compound 5c (CDCl<sub>3</sub>, 400 MHz)**

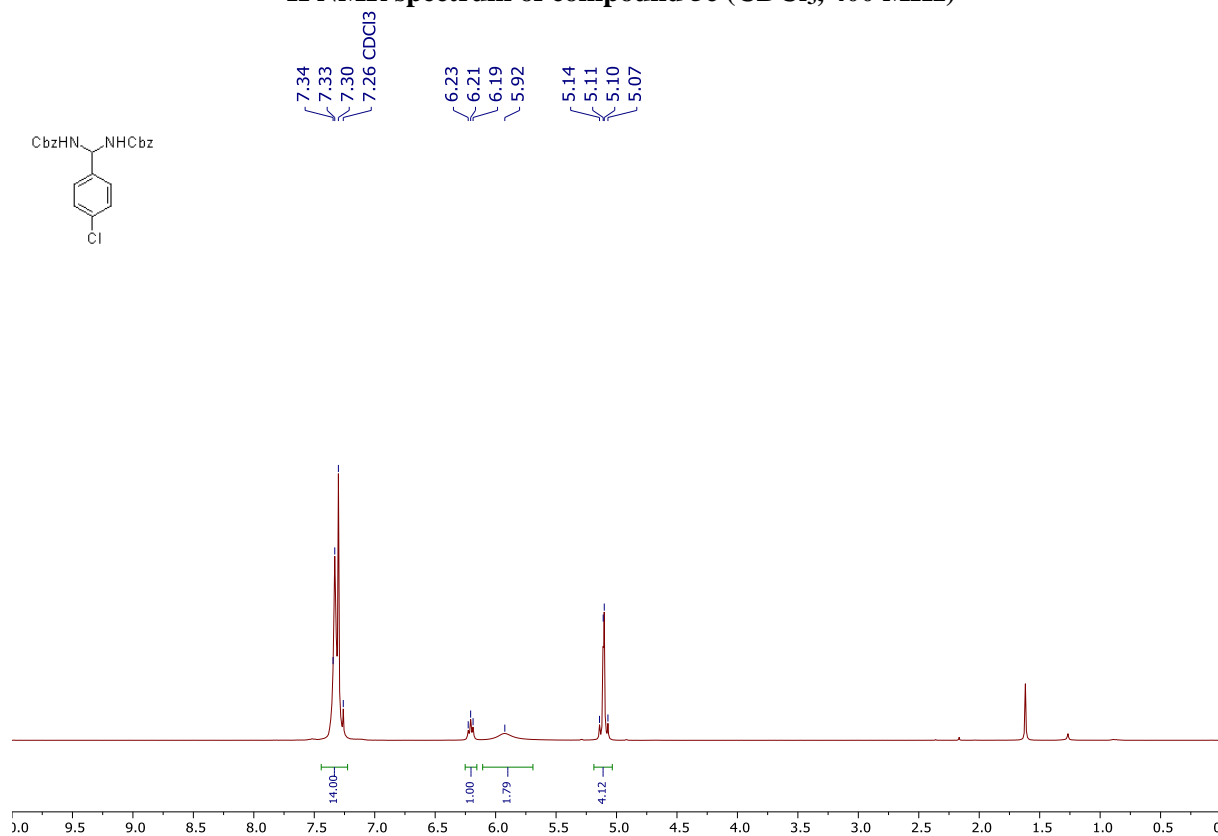

**<sup>13</sup>C NMR spectrum of compound 5c (CDCl<sub>3</sub>, 100 MHz)**

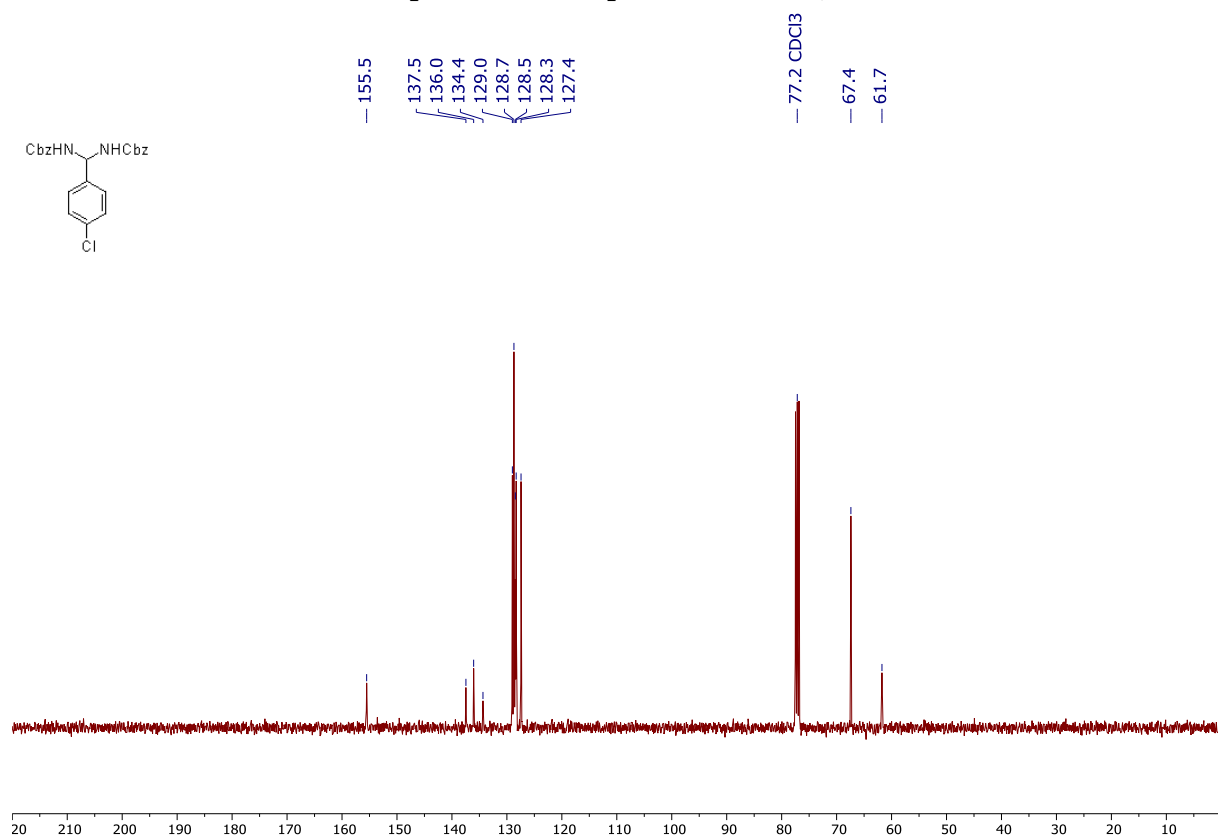

**<sup>1</sup>H NMR spectrum of compound 5d (CDCl<sub>3</sub>, 400 MHz)**

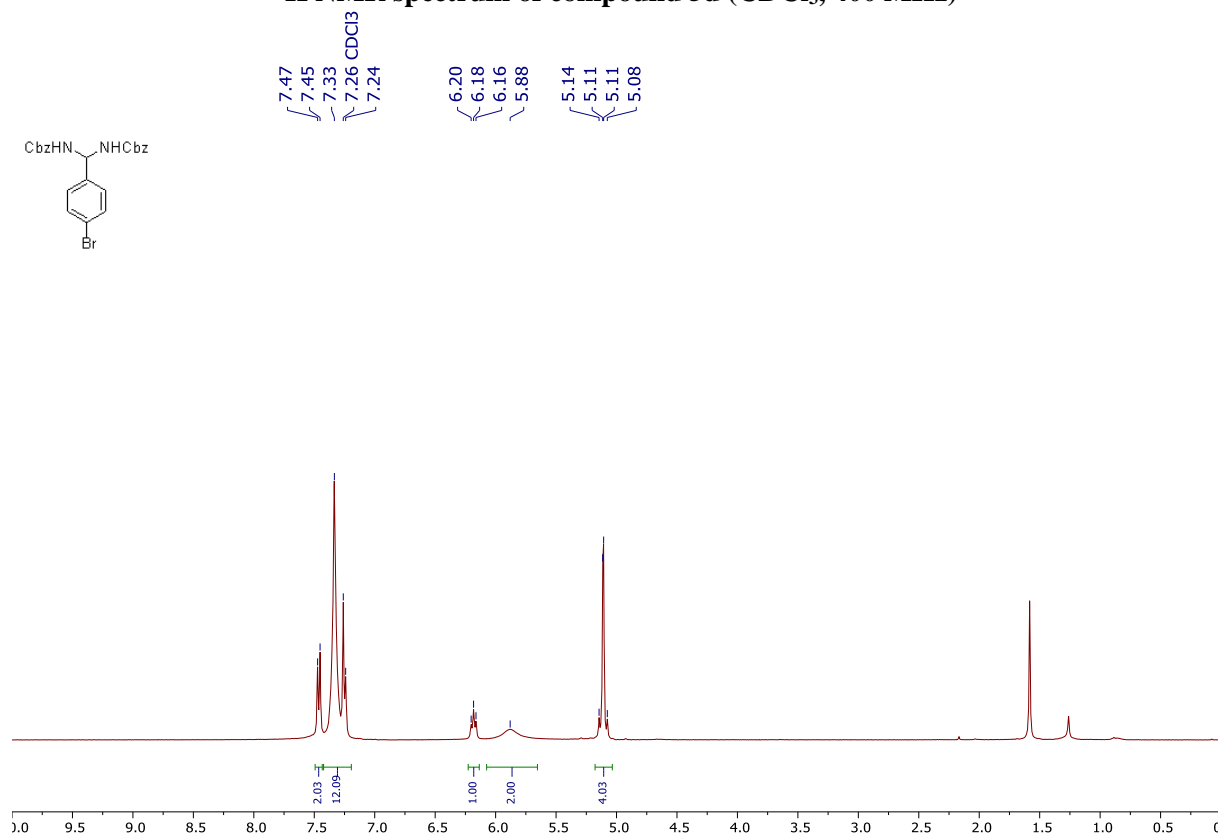

**<sup>13</sup>C NMR spectrum of compound 5d (CDCl<sub>3</sub>, 100 MHz)**

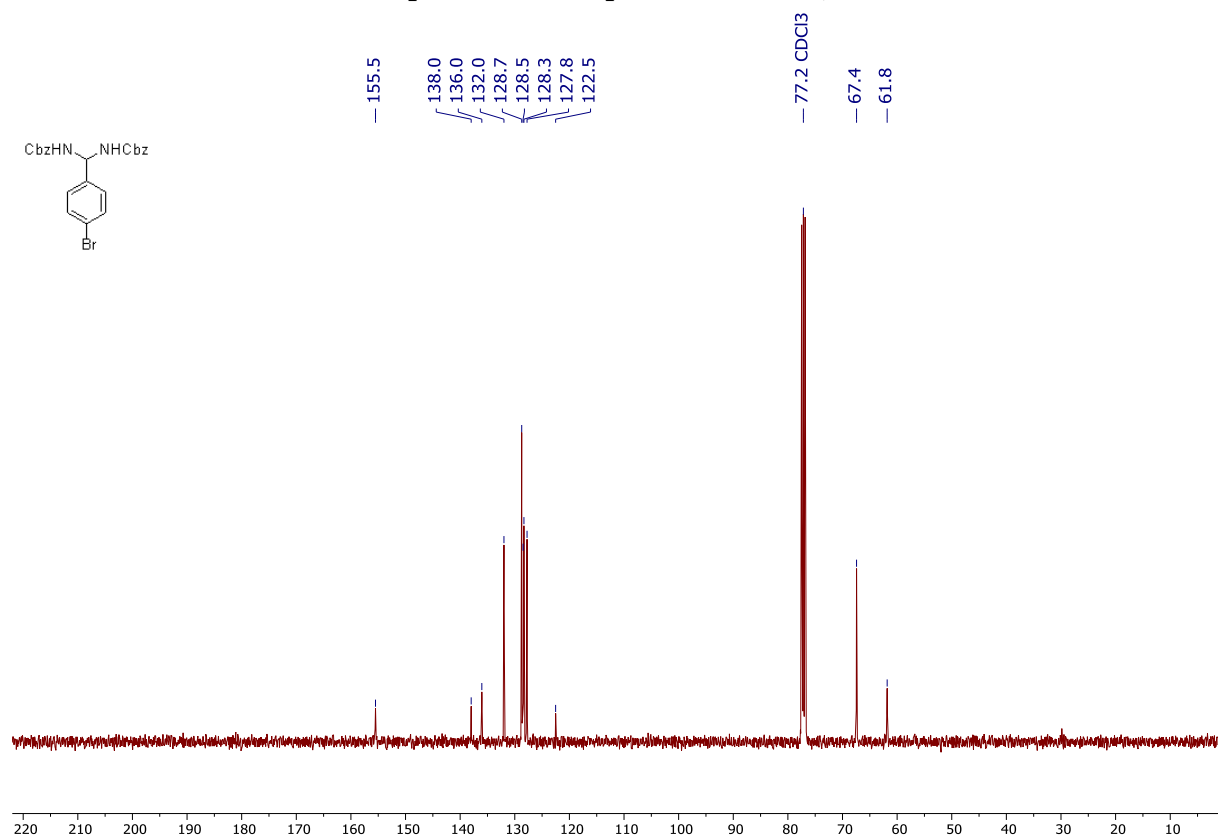

**<sup>1</sup>H NMR spectrum of compound 5e (CDCl<sub>3</sub>, 400 MHz)**

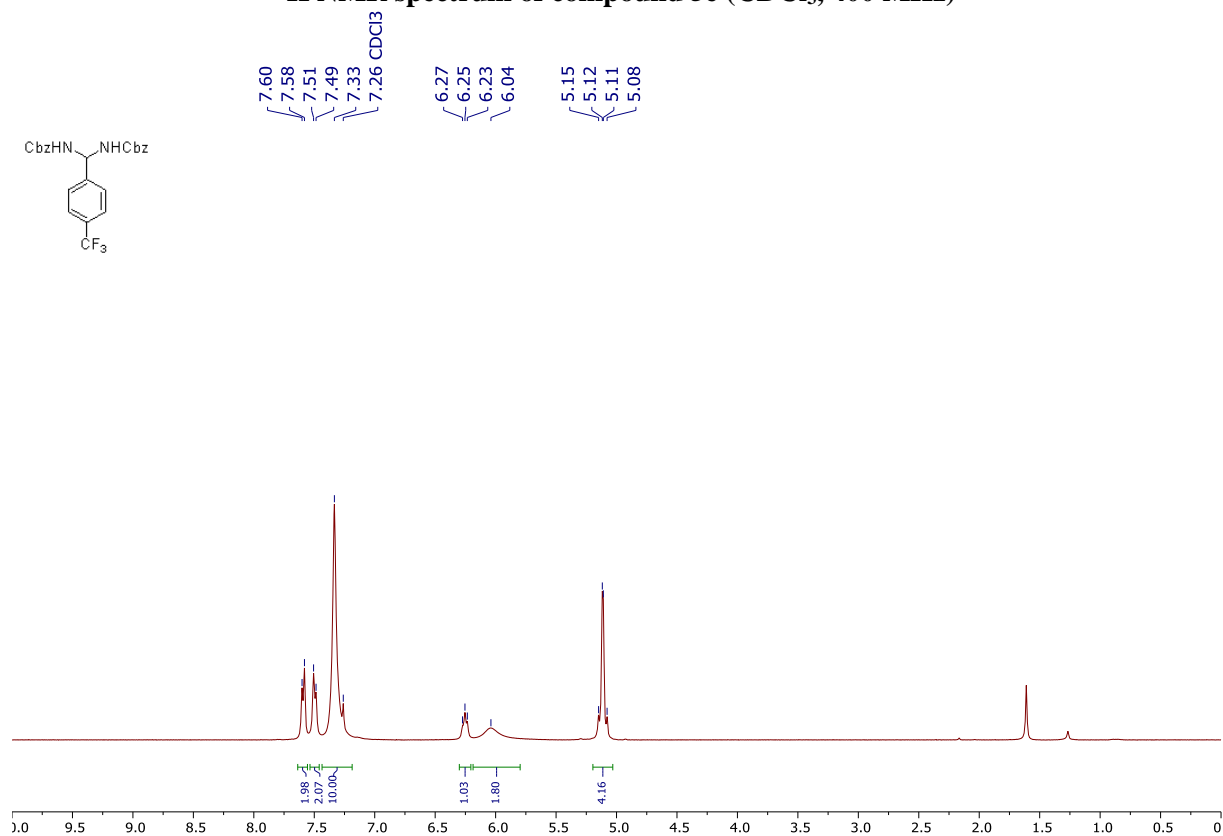

**<sup>13</sup>C NMR spectrum of compound 5e (CDCl<sub>3</sub>, 100 MHz)**

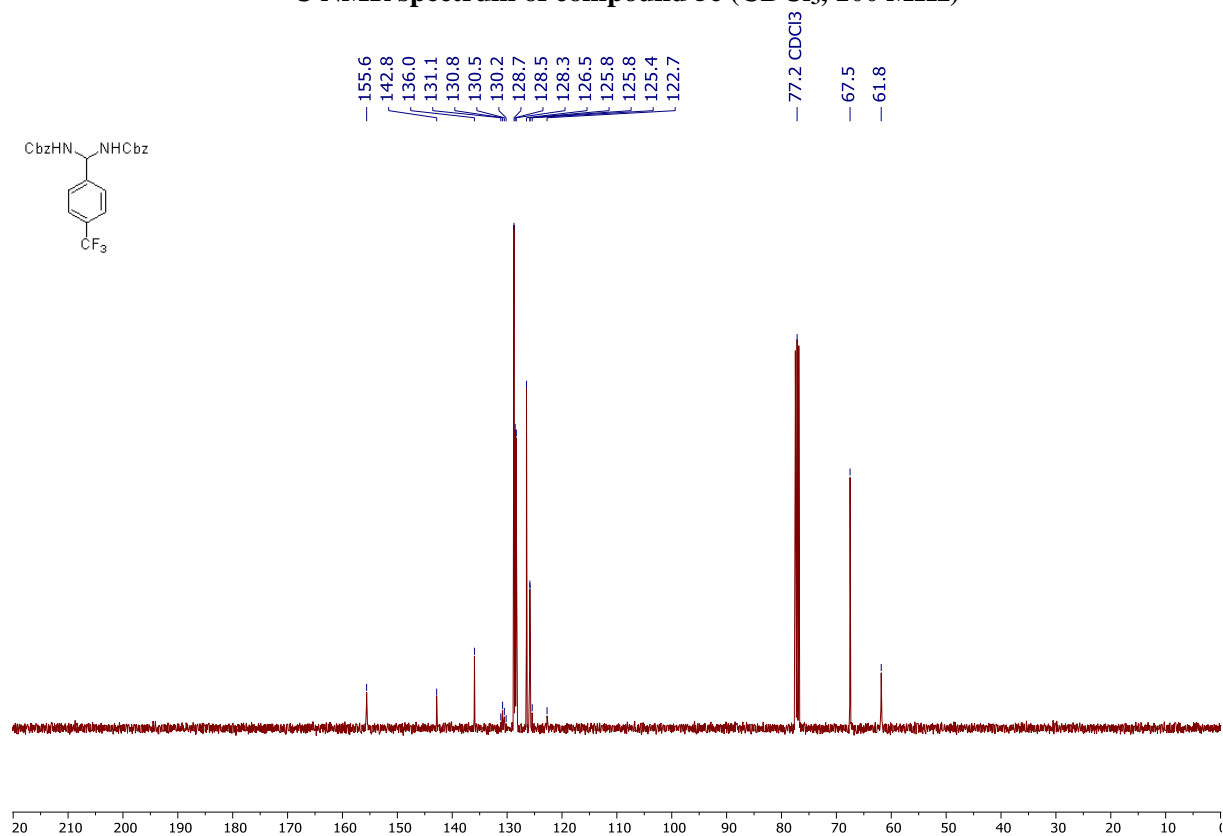

**$^{19}\text{F}$  NMR spectrum of compound 5e ( $\text{CDCl}_3$ , 376 MHz)**

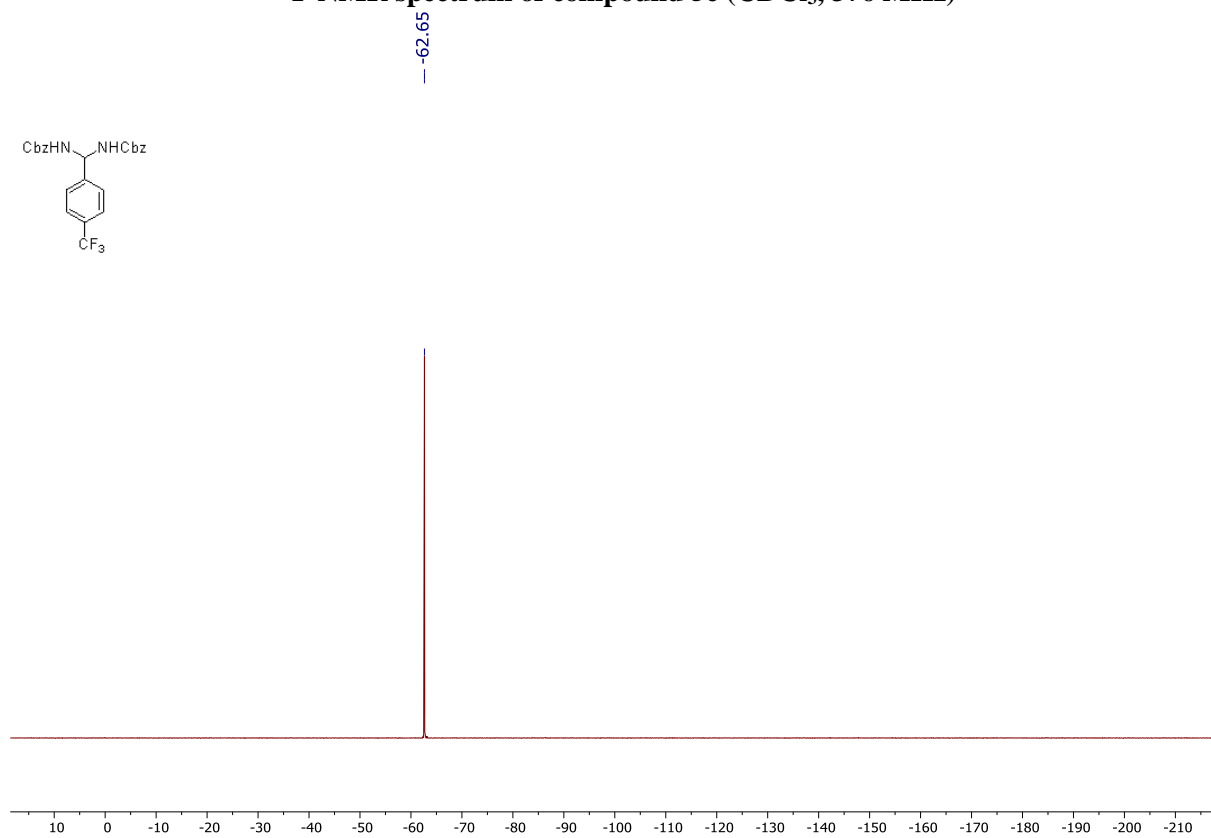

**<sup>1</sup>H NMR spectrum of compound 5f (CDCl<sub>3</sub>, 400 MHz)**

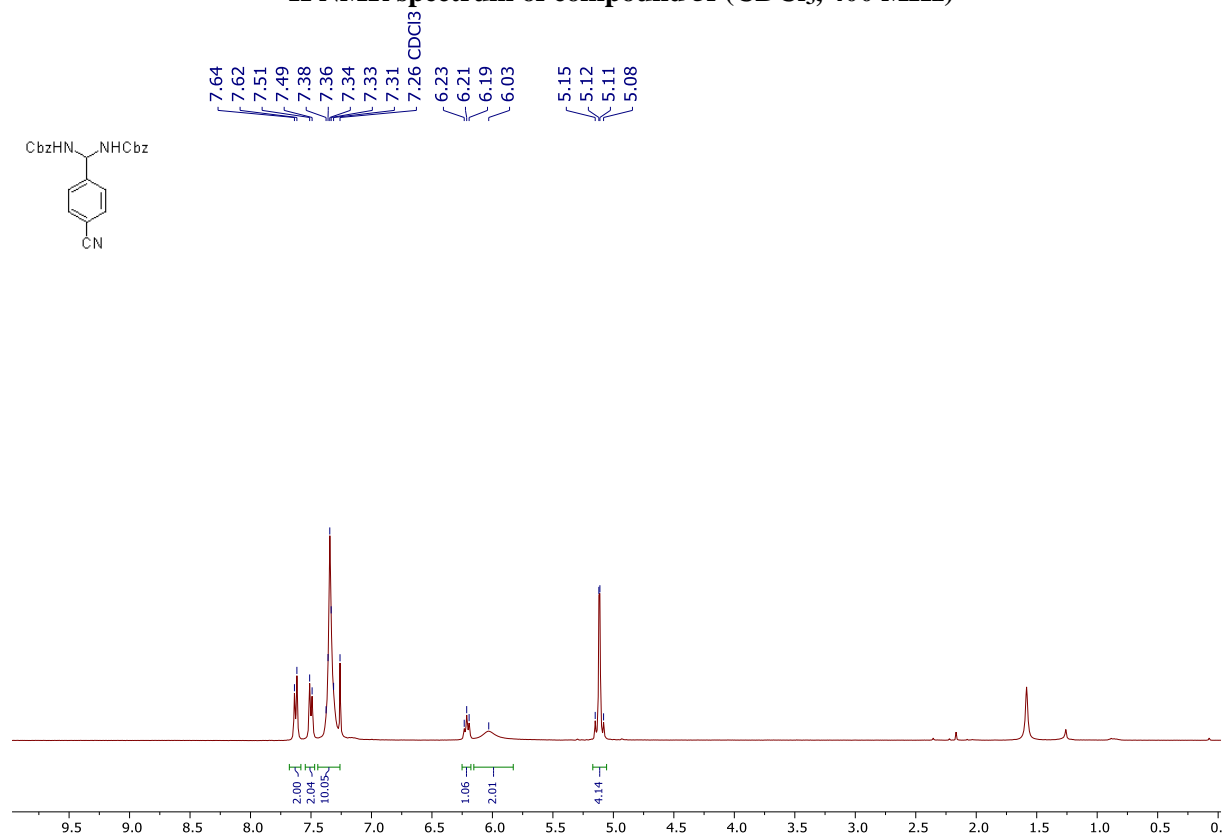

**<sup>13</sup>C NMR spectrum of compound 5f (CDCl<sub>3</sub>, 100 MHz)**

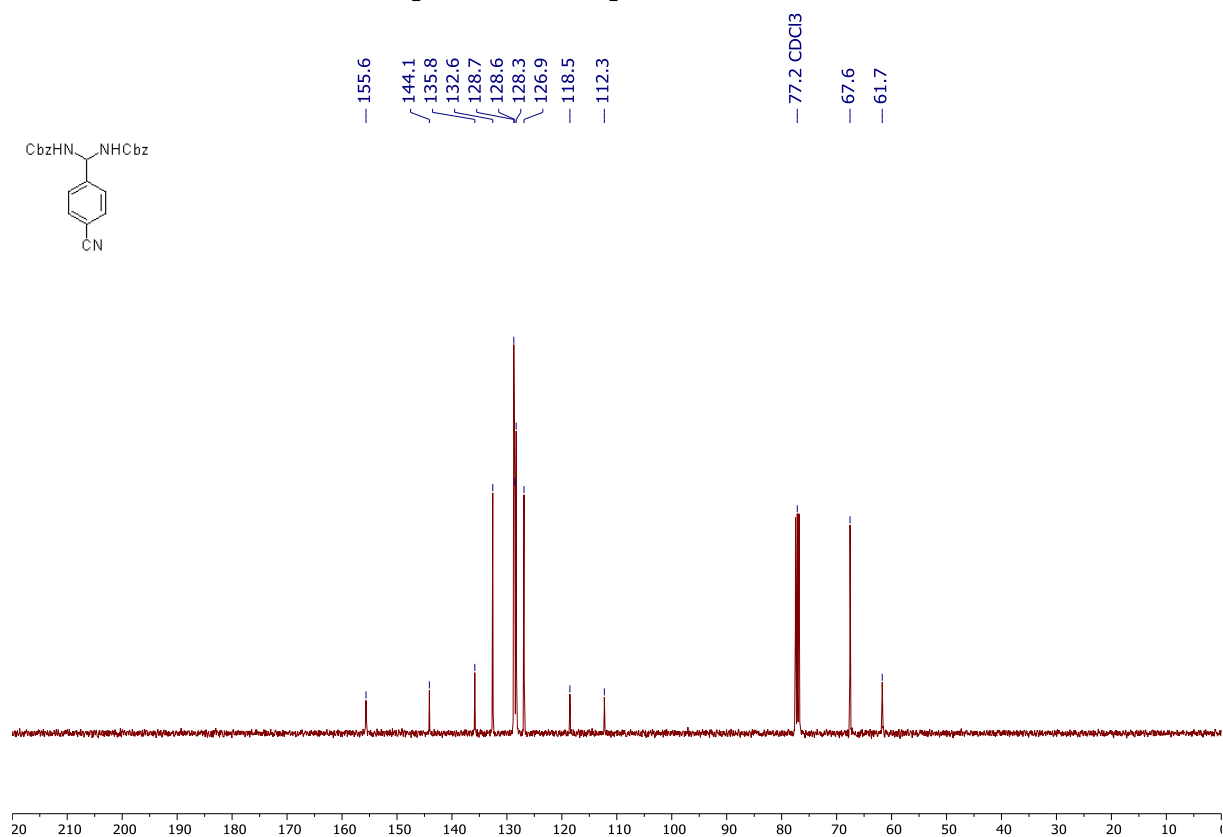

**<sup>1</sup>H NMR spectrum of compound 5g (DMSO-*d*<sub>6</sub>, 400 MHz)**

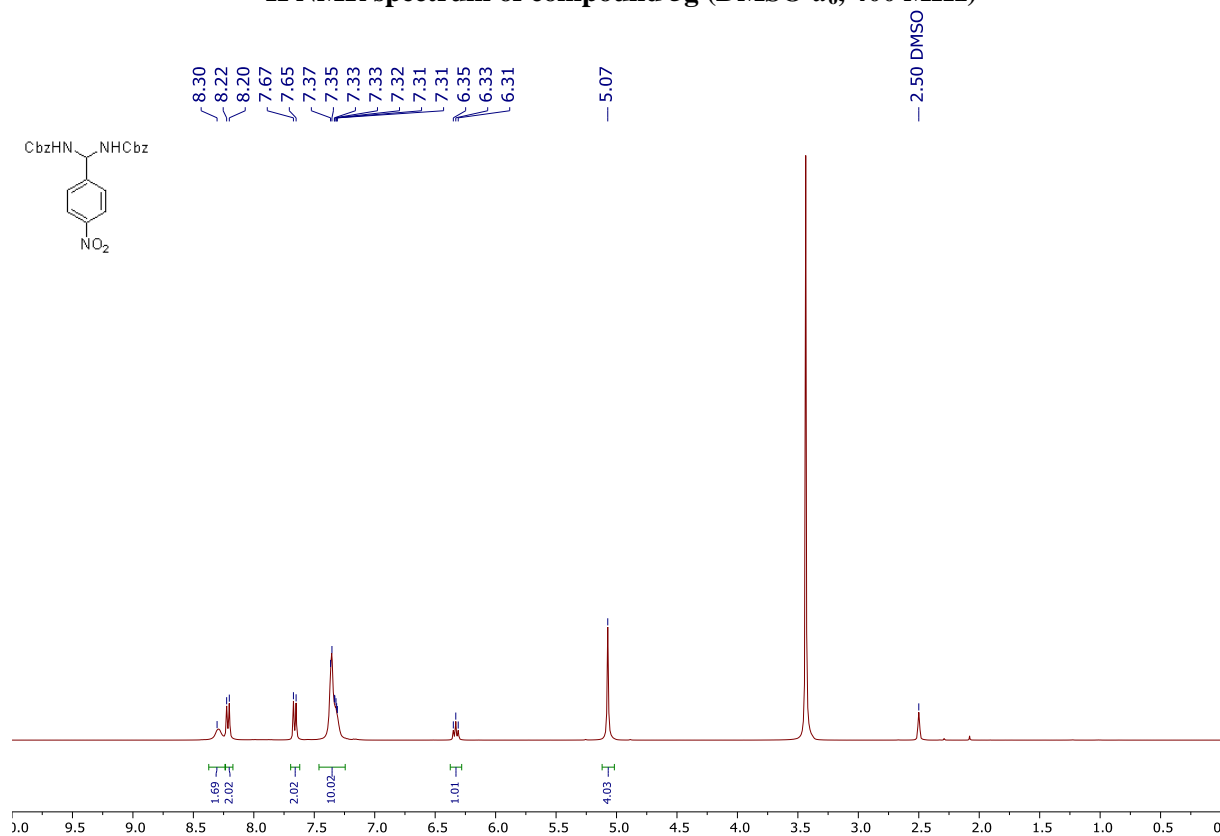

**<sup>13</sup>C NMR spectrum of compound 5g (DMSO-*d*<sub>6</sub>, 100 MHz)**

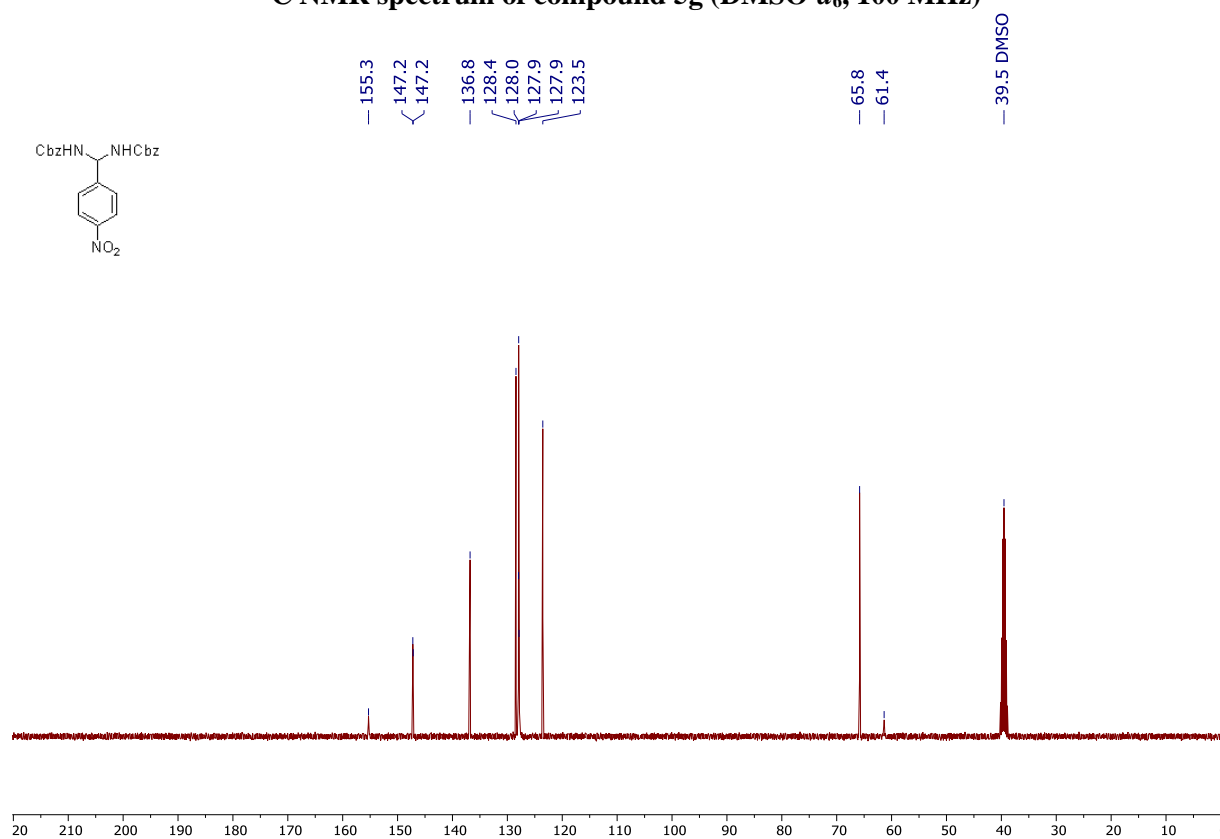



**<sup>1</sup>H NMR spectrum of compound 5h (CDCl<sub>3</sub>, 400 MHz)**

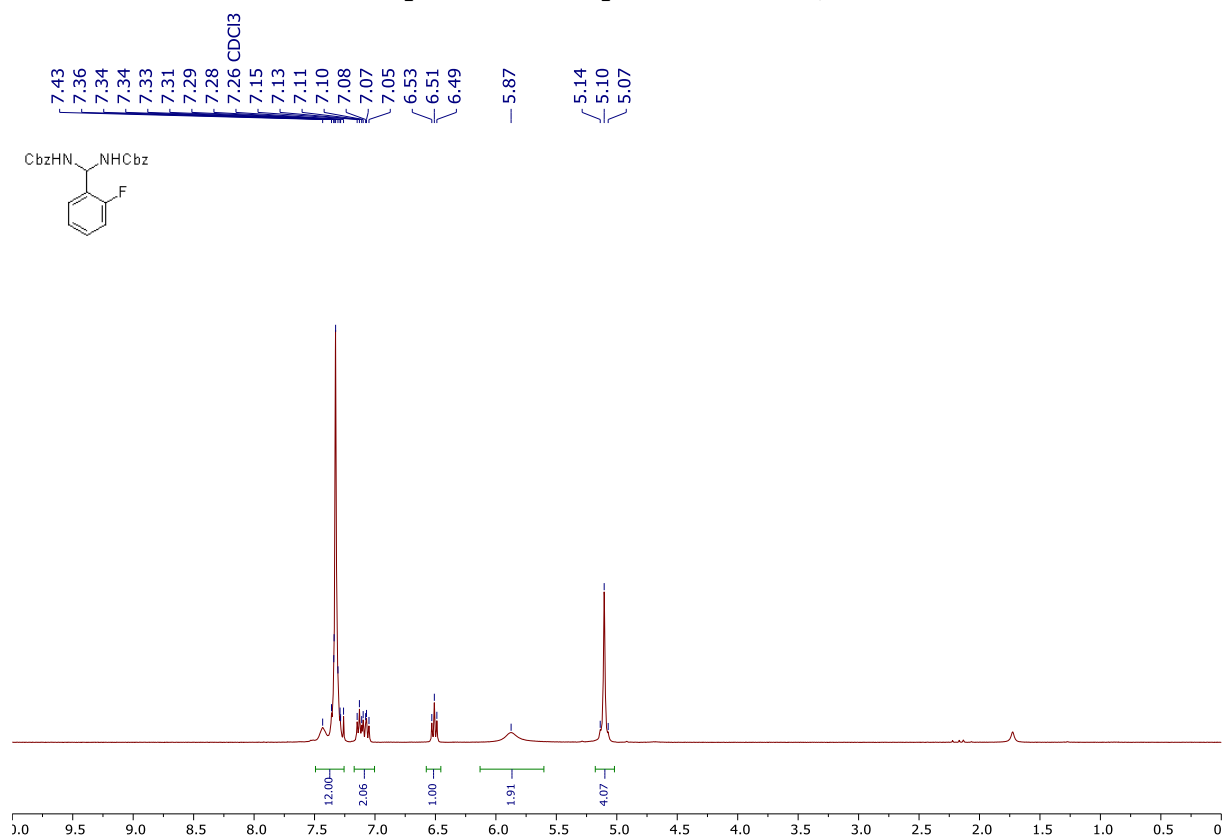

**<sup>13</sup>C NMR spectrum of compound 5h (CDCl<sub>3</sub>, 100 MHz)**

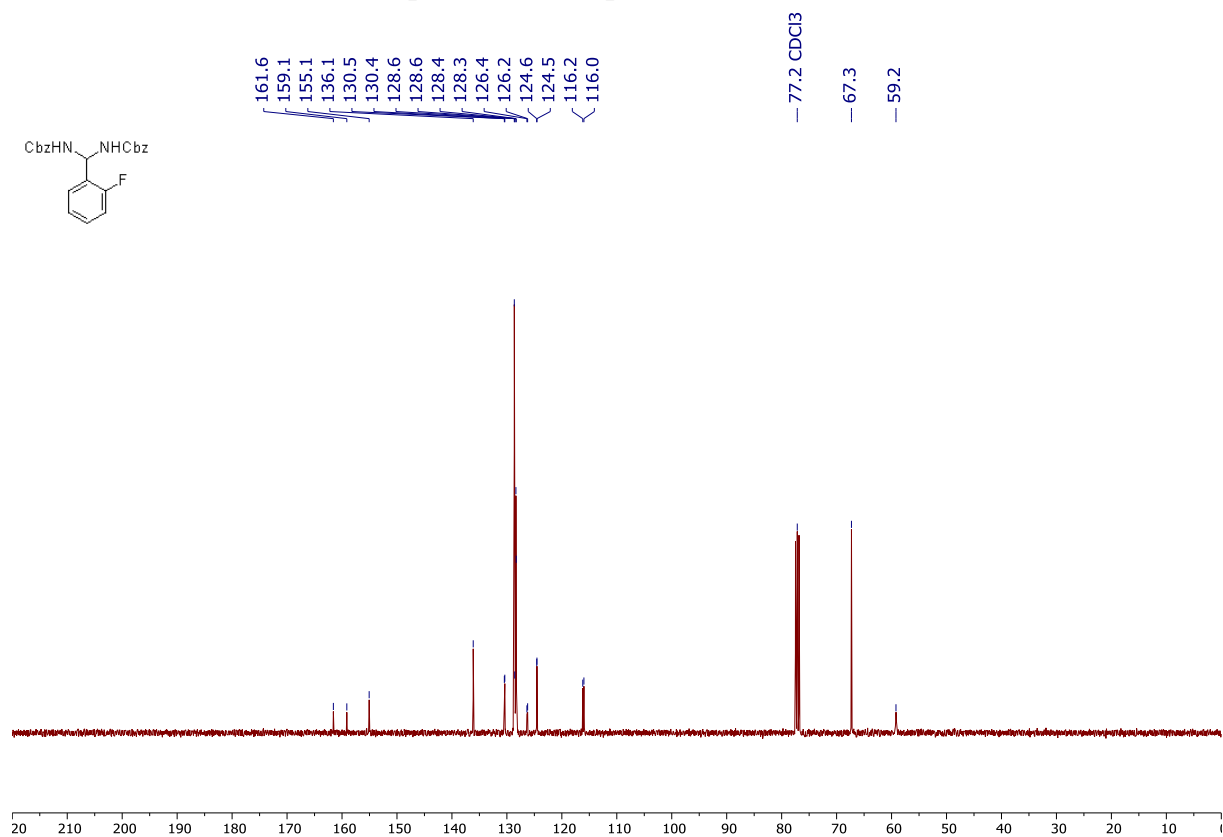

**$^{19}\text{F}$  NMR spectrum of compound 5h ( $\text{CDCl}_3$ , 376 MHz)**

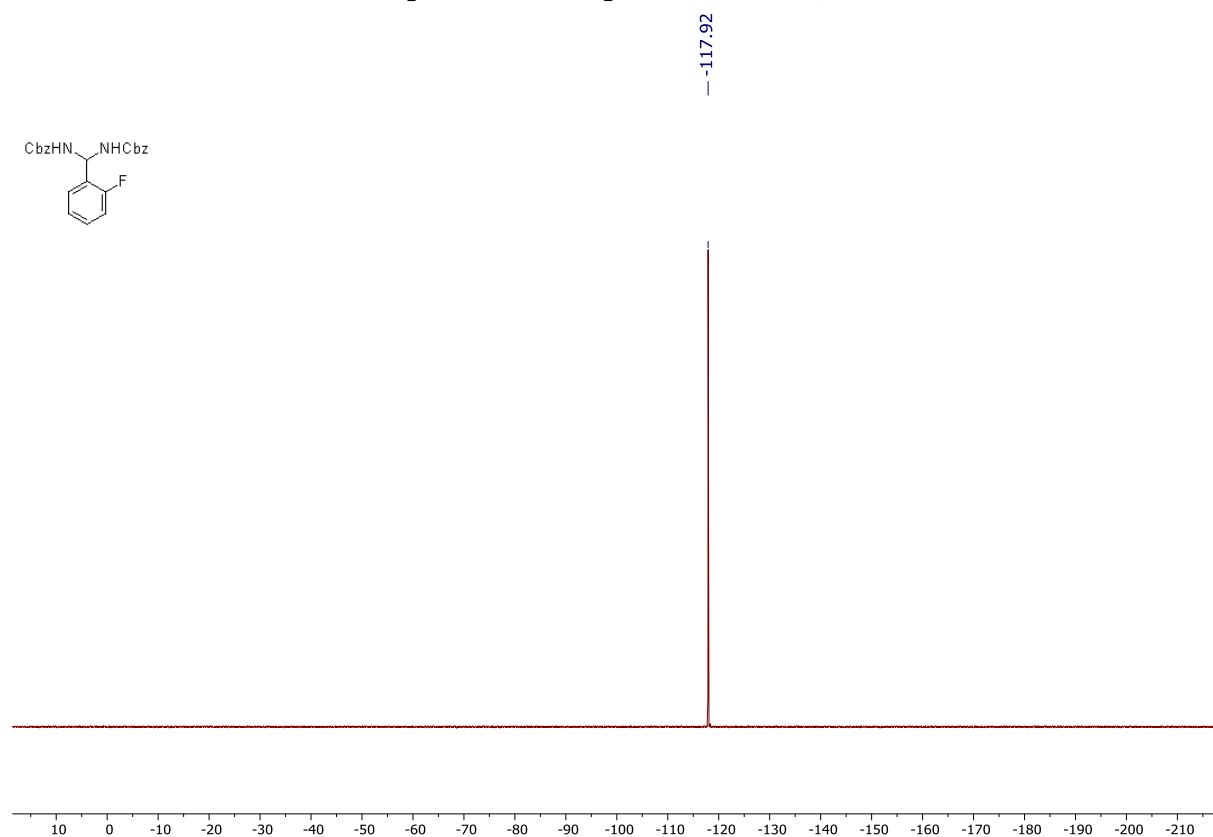

**<sup>1</sup>H NMR spectrum of compound 5i (CDCl<sub>3</sub>, 400 MHz)**

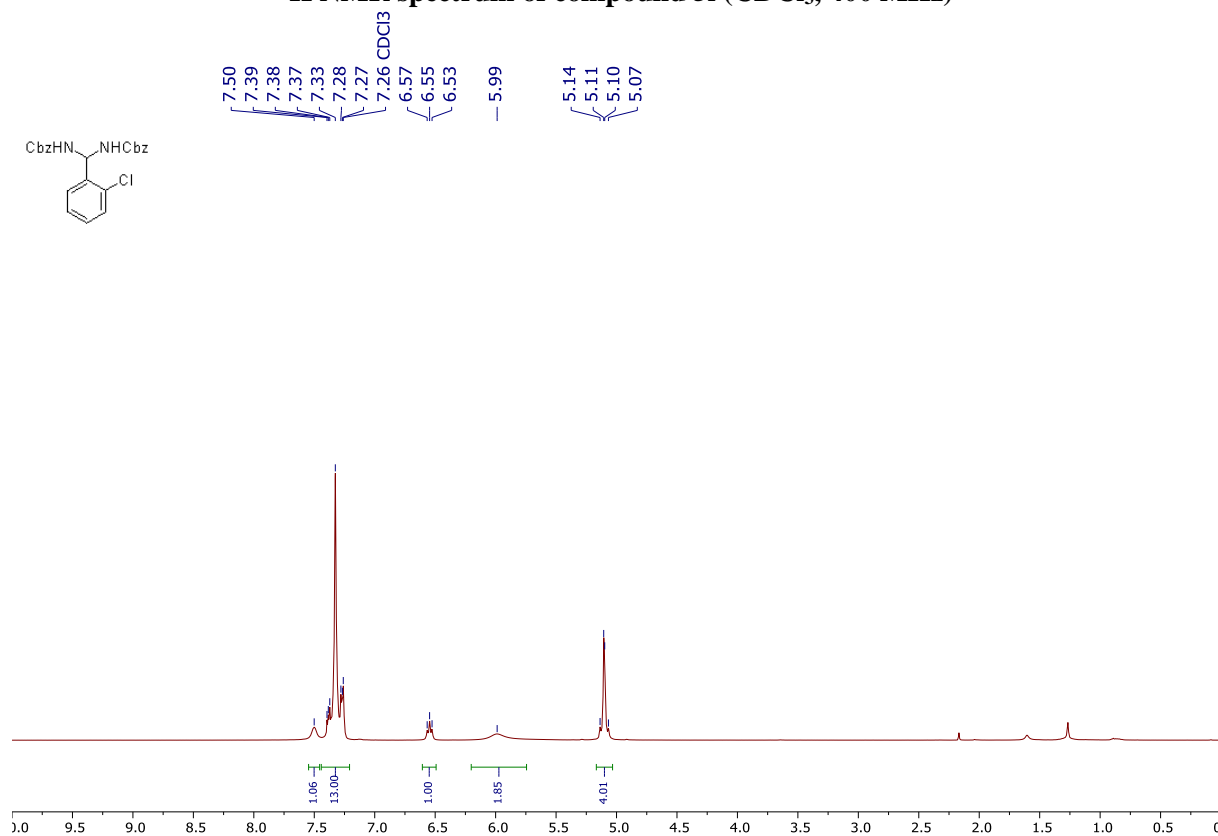

**<sup>13</sup>C NMR spectrum of compound 5i (CDCl<sub>3</sub>, 100 MHz)**

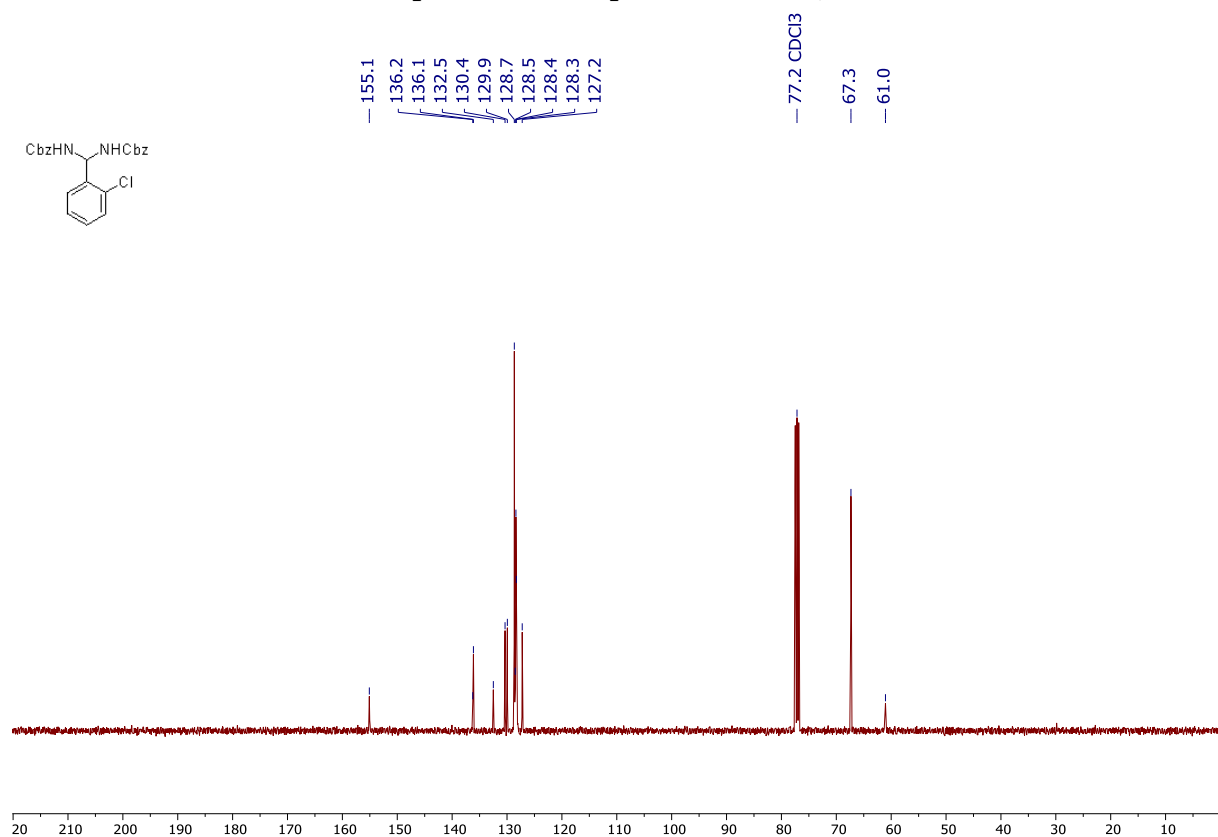

**<sup>1</sup>H NMR spectrum of compound 5j (CDCl<sub>3</sub>, 400 MHz)**

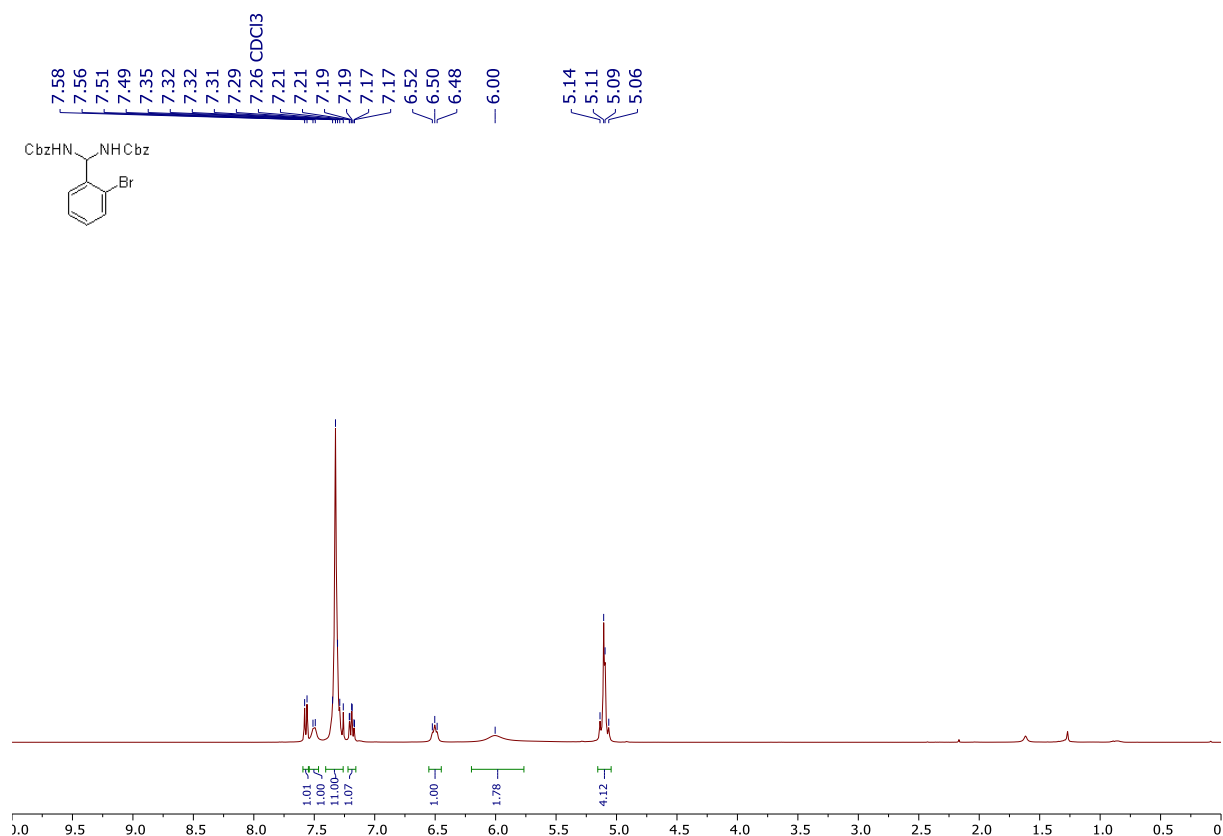

**<sup>13</sup>C NMR spectrum of compound 5j (CDCl<sub>3</sub>, 100 MHz)**

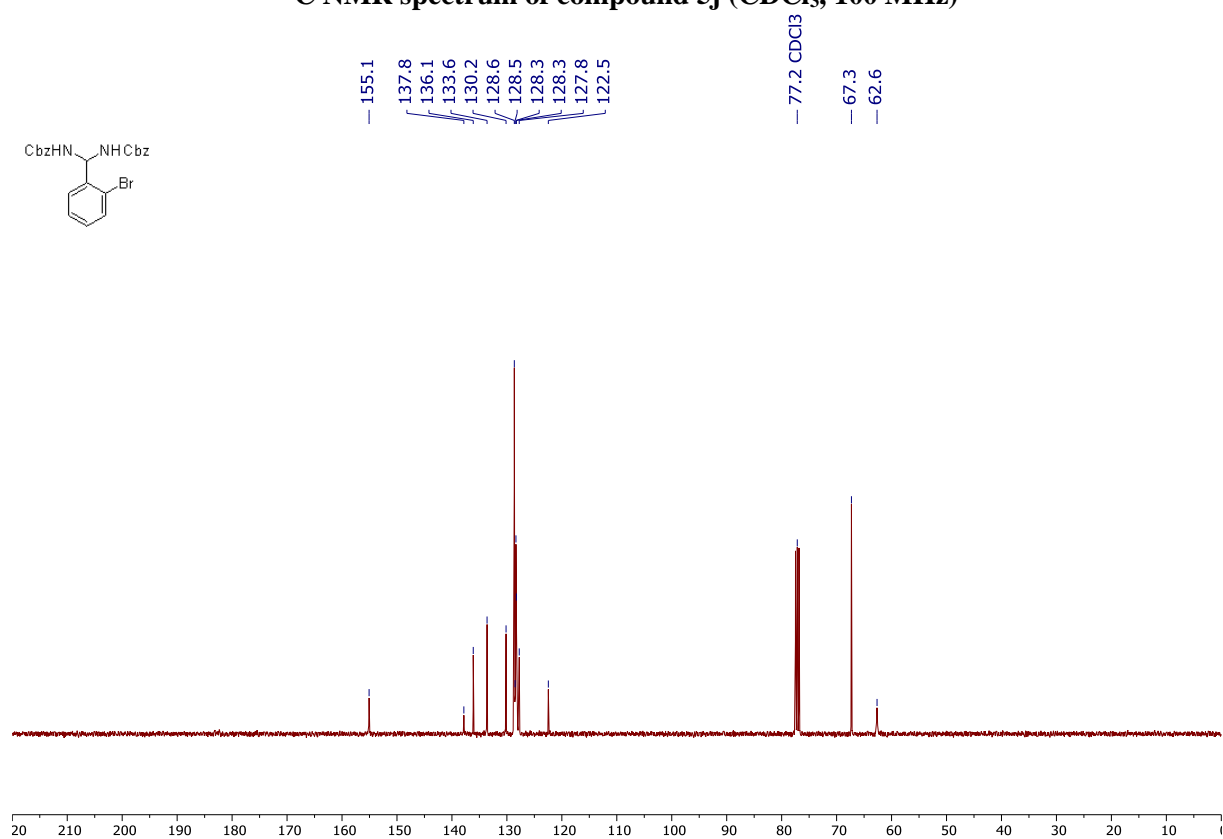

**<sup>1</sup>H NMR spectrum of compound 5k (CDCl<sub>3</sub>, 400 MHz)**

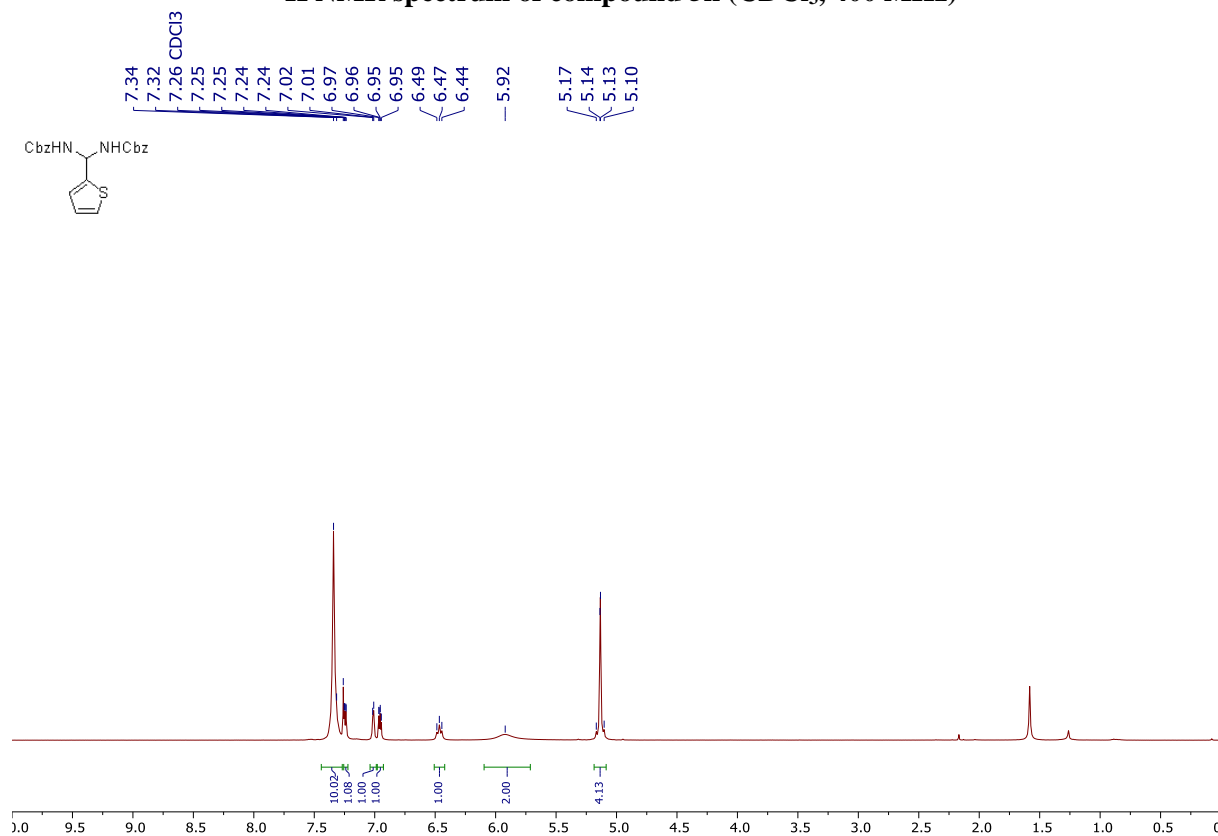

**<sup>13</sup>C NMR spectrum of compound 5k (CDCl<sub>3</sub>, 100 MHz)**

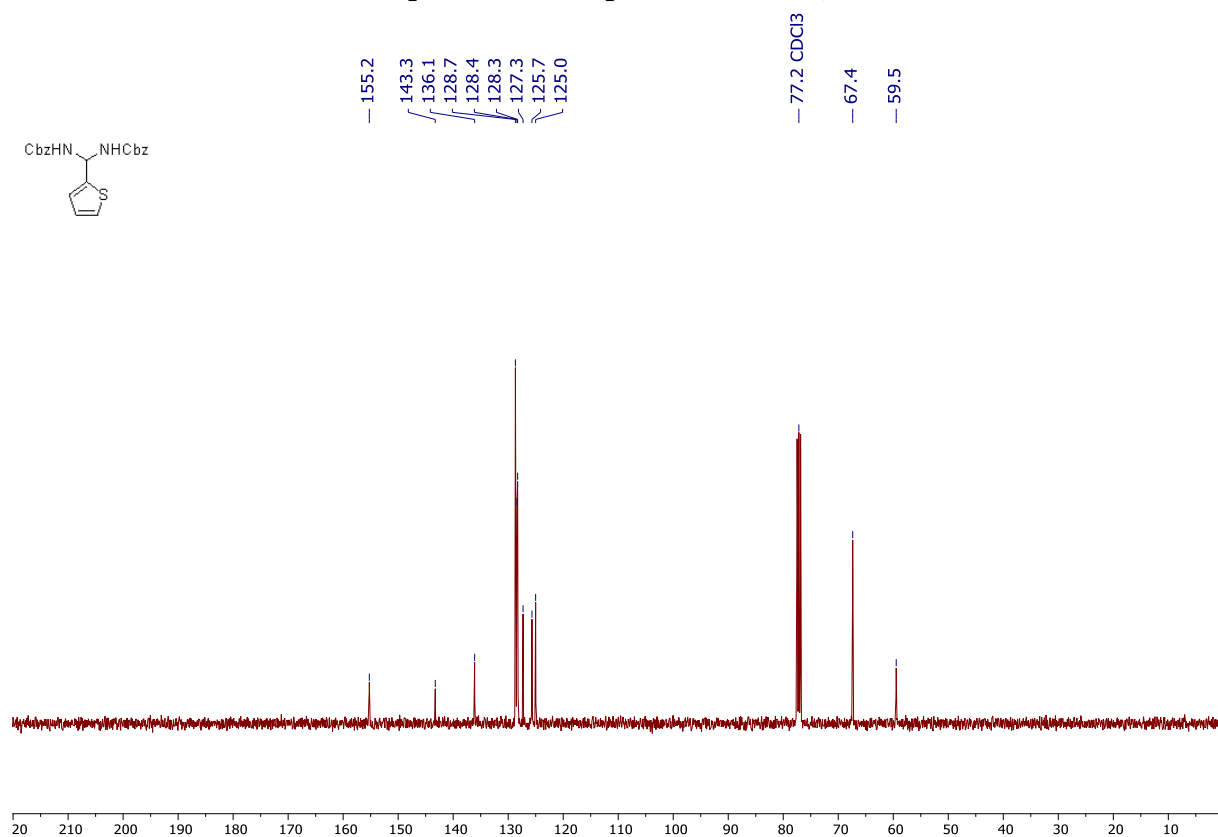

## 6.5. Indolizines 1a-d

<sup>1</sup>H NMR spectrum of compound 1a (CDCl<sub>3</sub>, 500 MHz)

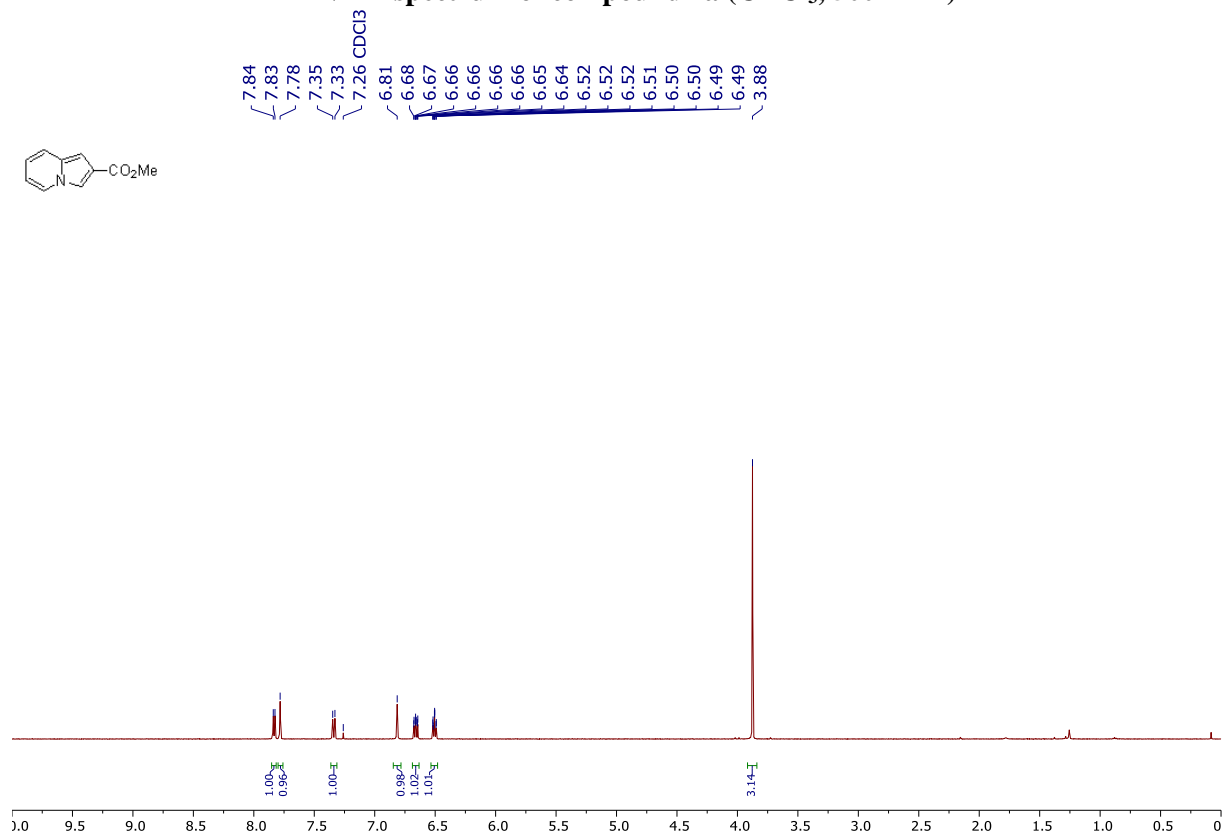

<sup>13</sup>C NMR spectrum of compound 1a (CDCl<sub>3</sub>, 126 MHz)

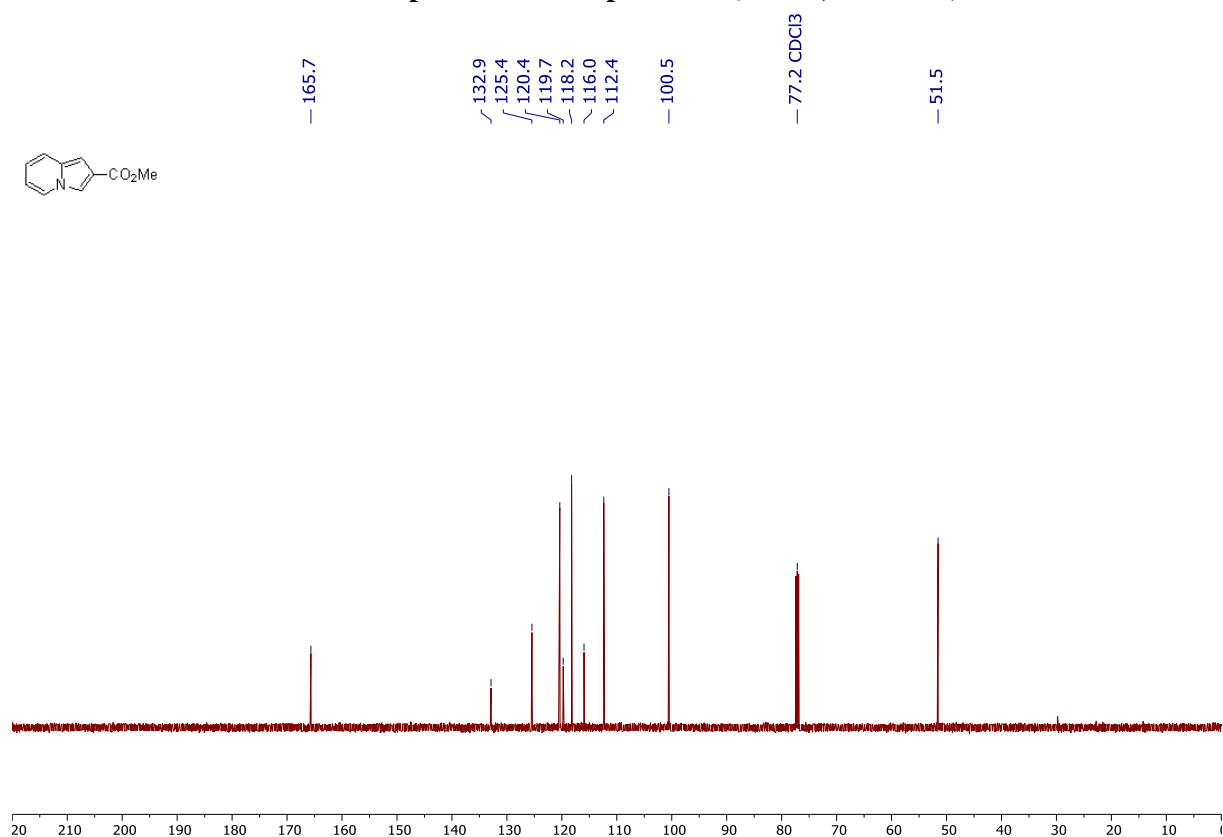

**<sup>1</sup>H NMR spectrum of compound 1b (CDCl<sub>3</sub>, 500 MHz)**

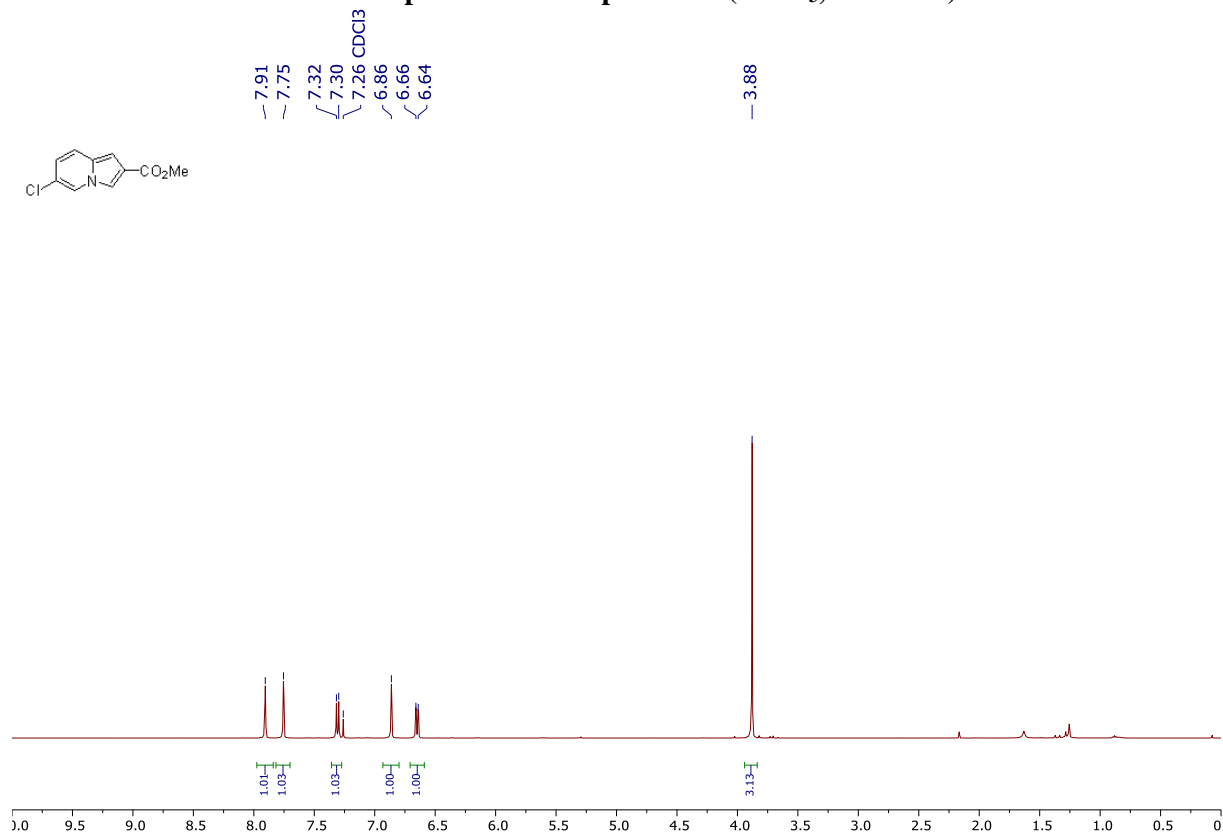

**<sup>13</sup>C NMR spectrum of compound 1b (CDCl<sub>3</sub>, 126 MHz)**

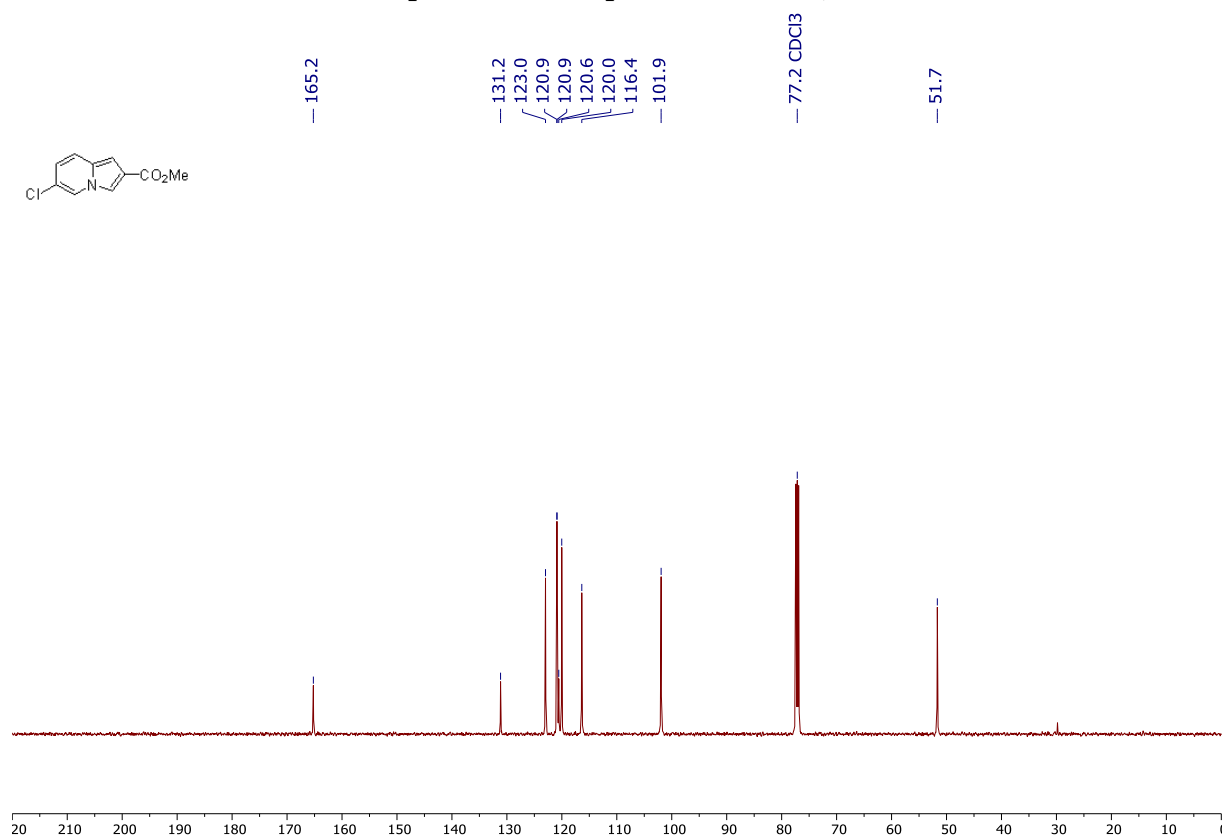

**<sup>1</sup>H NMR spectrum of compound 1c (CDCl<sub>3</sub>, 500 MHz)**

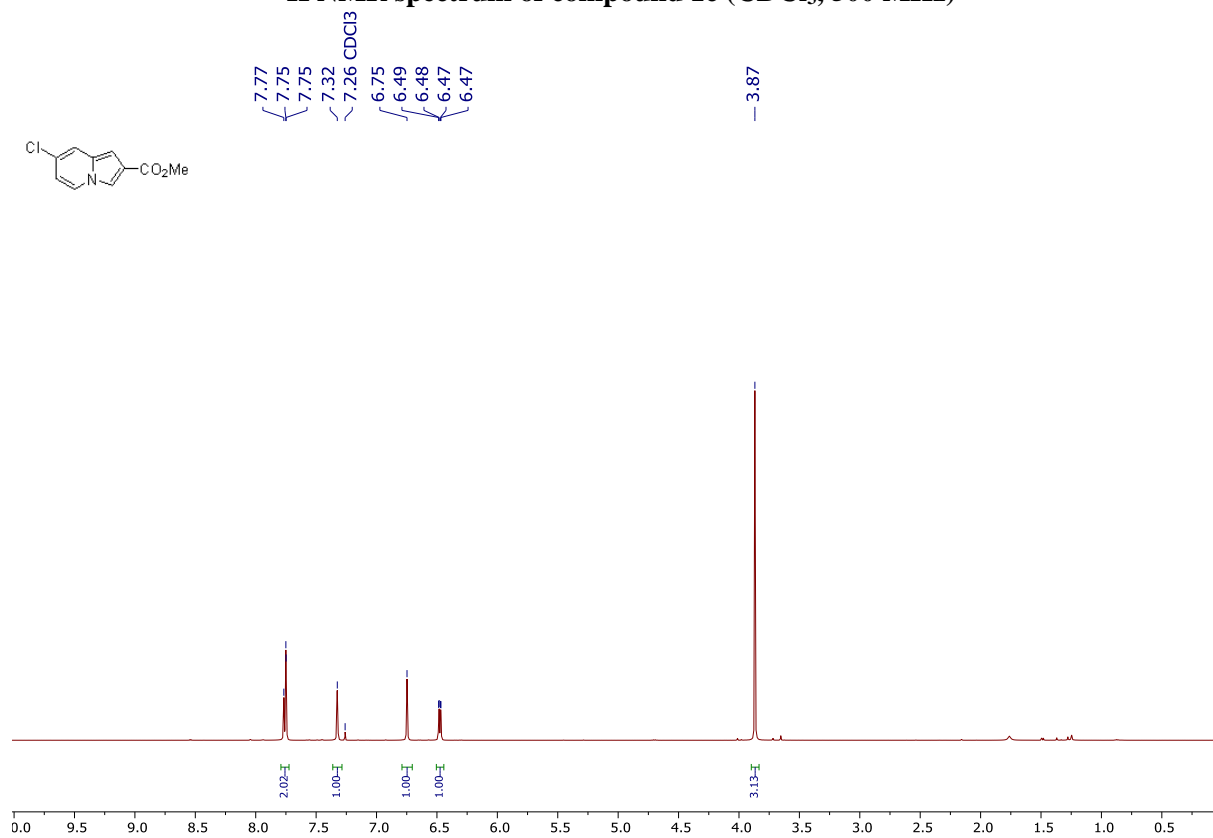

**<sup>13</sup>C NMR spectrum of compound 1c (CDCl<sub>3</sub>, 126 MHz)**

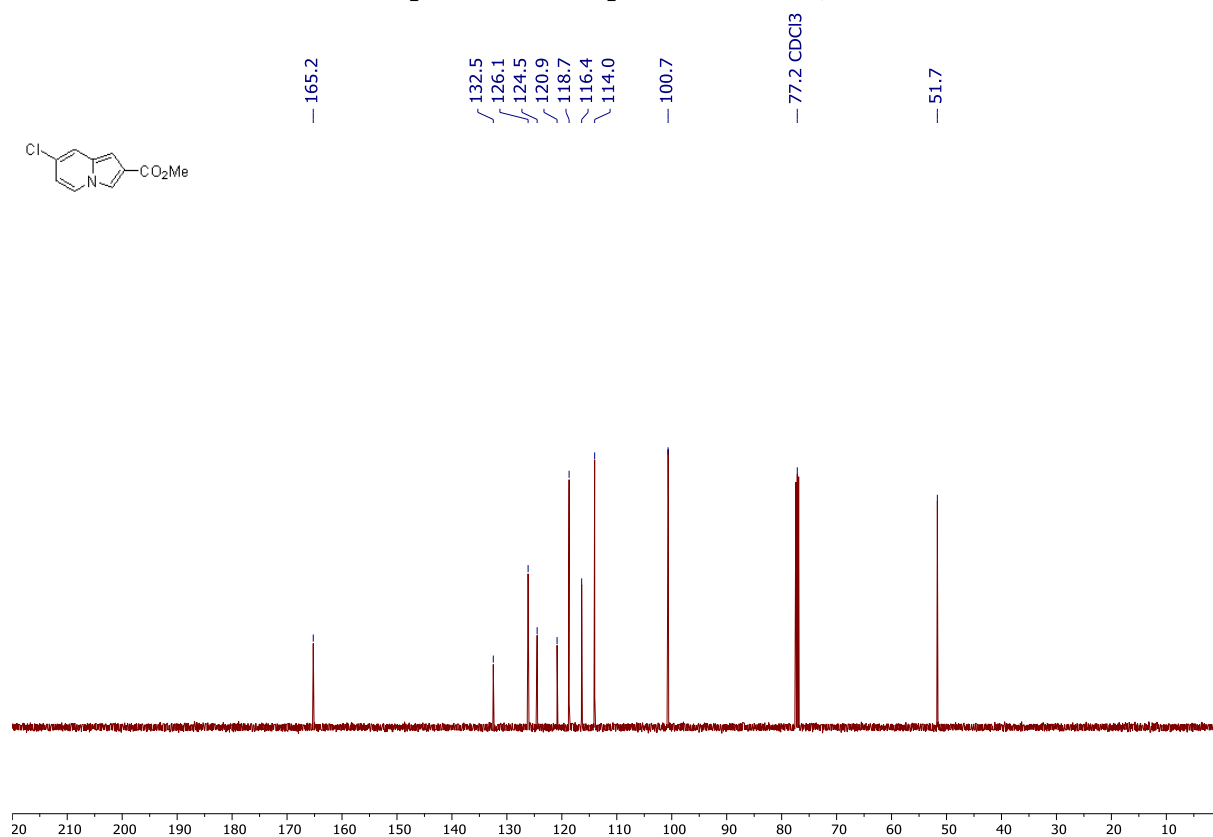



**<sup>1</sup>H NMR spectrum of compound 1d (CDCl<sub>3</sub>, 400 MHz)**

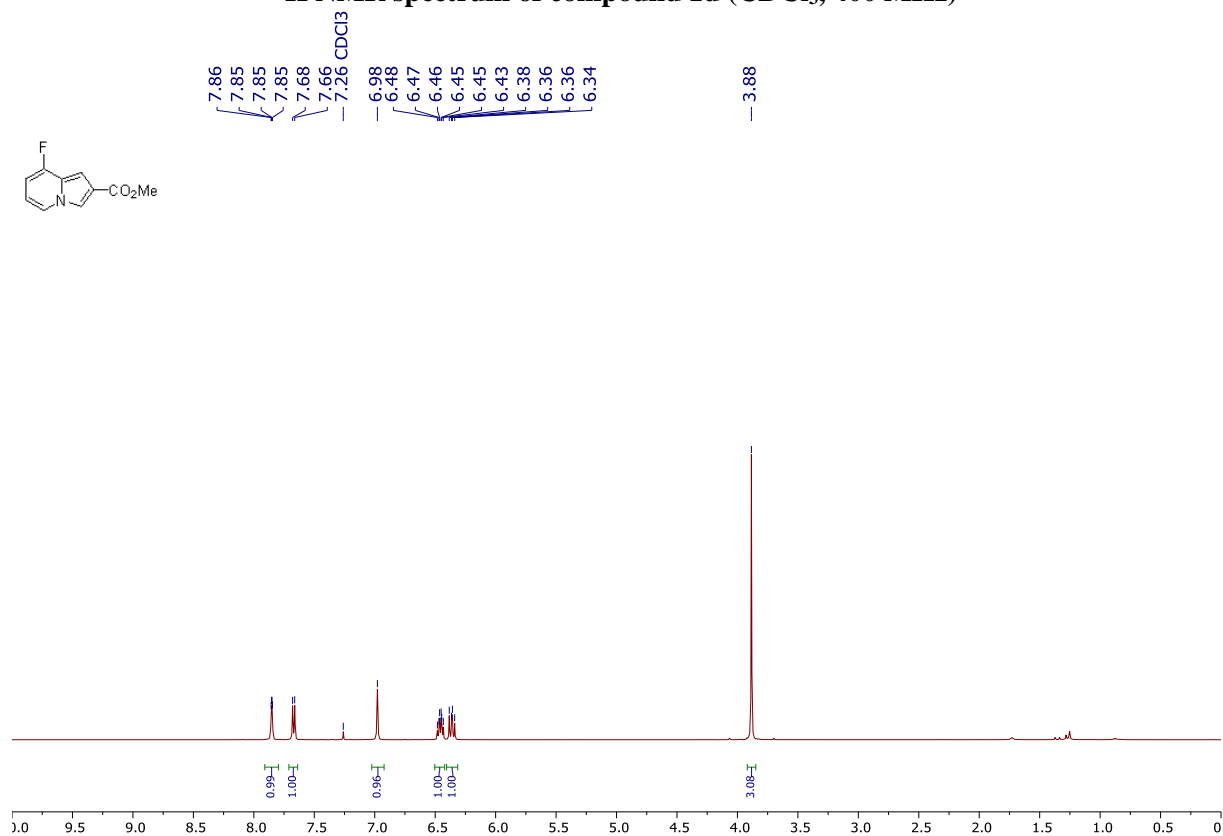

**<sup>13</sup>C NMR spectrum of compound 1d (CDCl<sub>3</sub>, 101 MHz)**

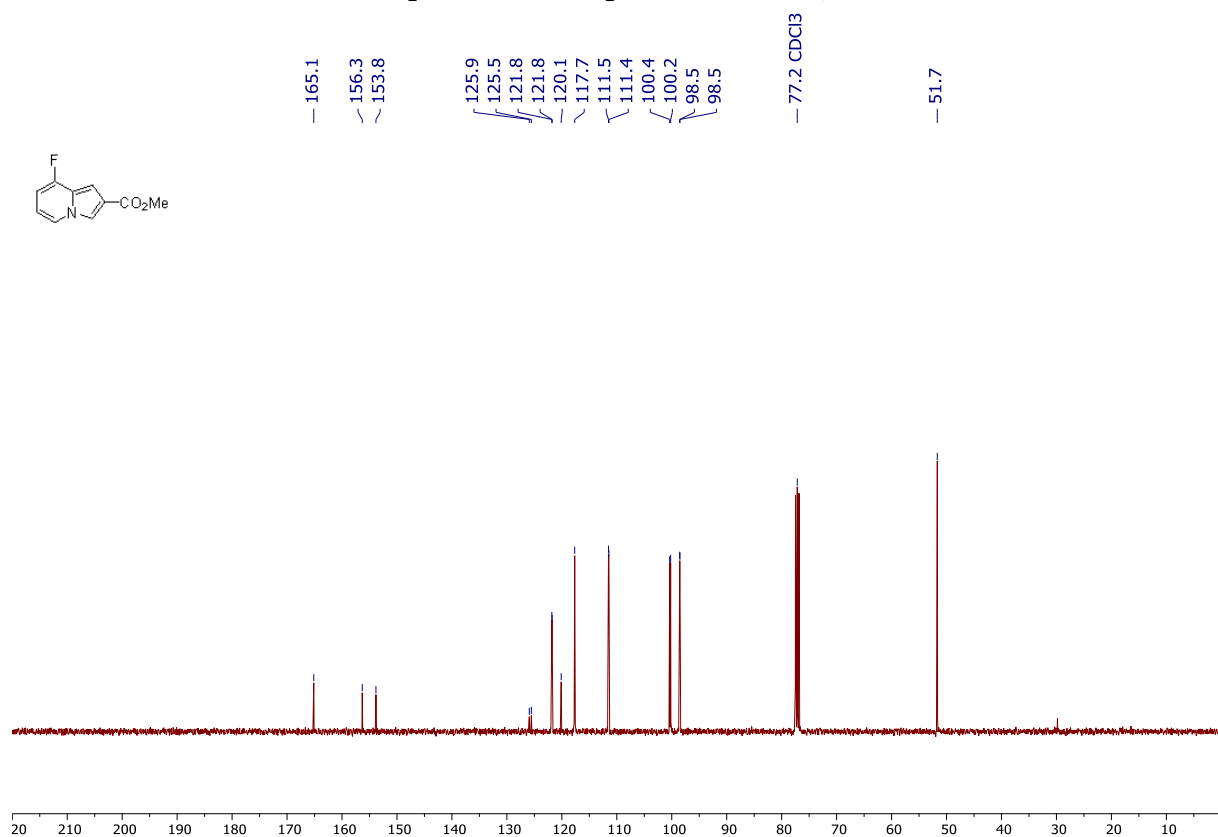

**$^{19}\text{F}$  NMR spectrum of compound 1d ( $\text{CDCl}_3$ , 376 MHz)**

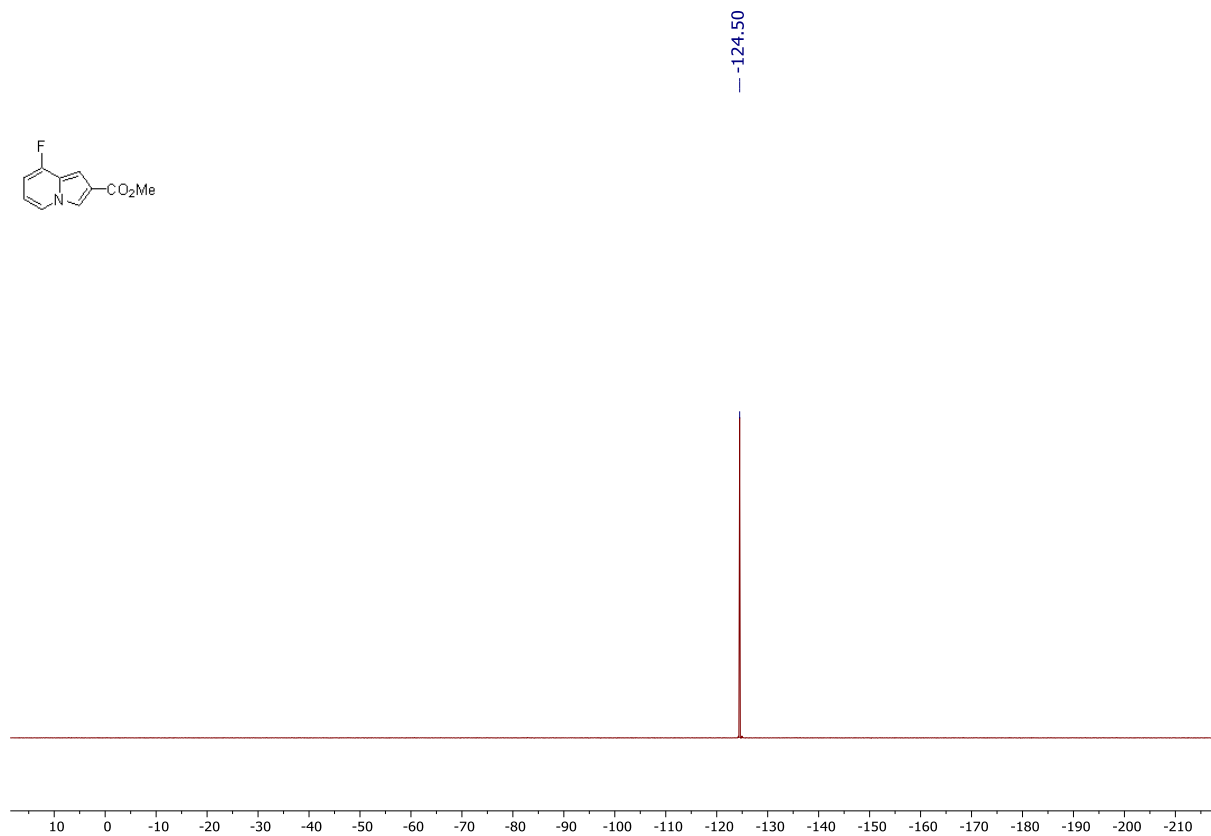

## 6.6. All NMR spectra of compounds 3a and 4a

### 6.6.1. Compound 3a

<sup>1</sup>H NMR spectrum of compound 3a (CDCl<sub>3</sub>, 600 MHz)

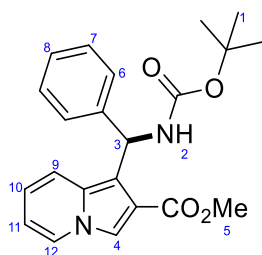

| H  | δH        |
|----|-----------|
| 1  | 1.48      |
| 2  | 7.08      |
| 3  | 6.58-6.50 |
| 4  | 7.77      |
| 5  | 3.73      |
| 6  | 7.26-7.21 |
| 7  | 7.26-7.21 |
| 8  | 7.19-7.13 |
| 9  | 7.61      |
| 10 | 6.71      |
| 11 | 6.58-6.50 |
| 12 | 7.80-7.75 |

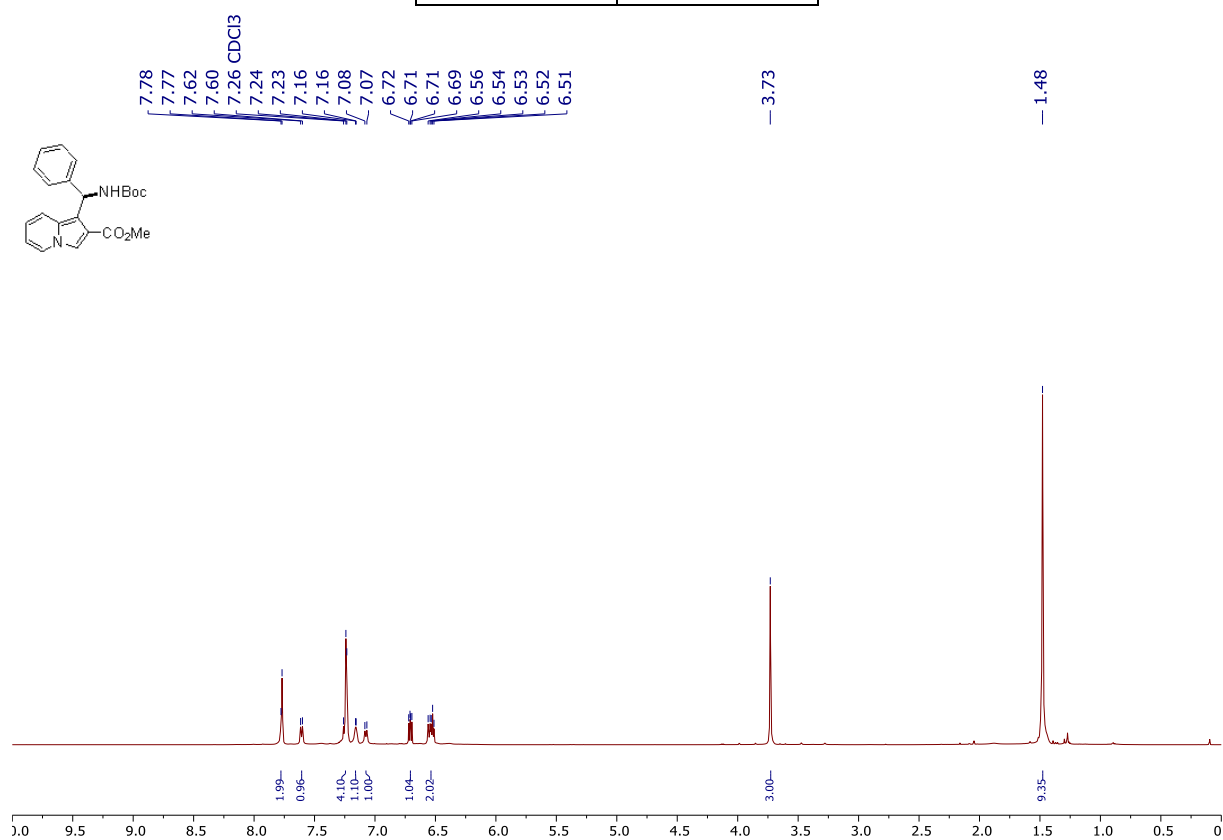

**$^{13}\text{C}$  NMR spectrum of compound 3a ( $\text{CDCl}_3$ , 151 MHz)**

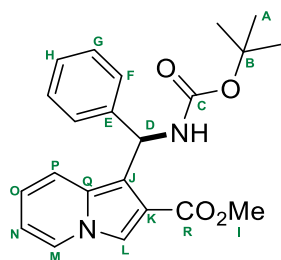

| C | $\delta\text{C}$ |
|---|------------------|
| A | 28.6             |
| B | 79.2             |
| C | 156.0            |
| D | 48.9             |
| E | 143.1            |
| F | 126.1            |
| G | 128.1            |
| H | 126.5            |
| I | 51.6             |
| J | 114.8            |
| K | 116.4            |
| L | 117.7            |
| M | 125.2            |
| N | 112.8            |
| O | 118.7            |
| P | 118.5            |
| Q | 131.3            |
| R | 165.9            |

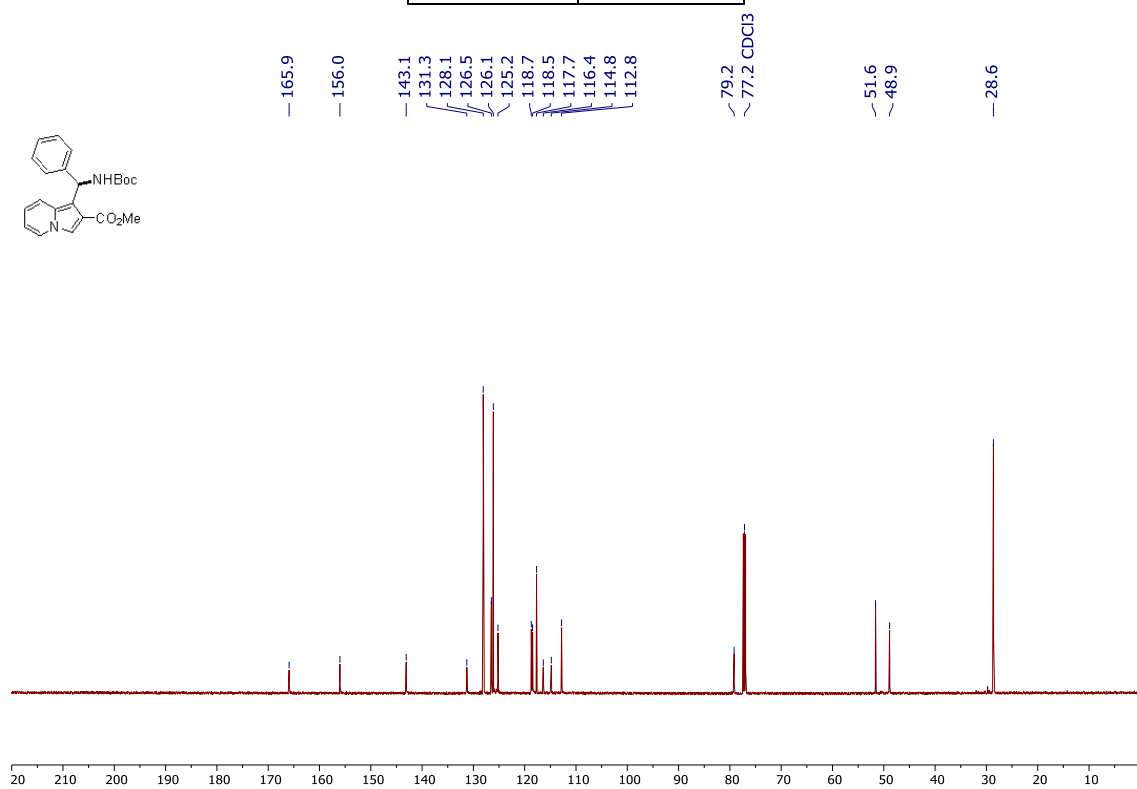

**COSY spectrum of compound 3a (CDCl<sub>3</sub>)**

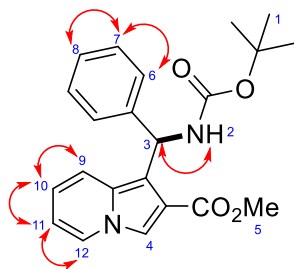

| H  | $\delta$ H | $^3J_{H-H}$      |
|----|------------|------------------|
| 2  | 7.08       | H2-H3            |
| 3  | 6.58-6.50  | H2-H3            |
| 6  | 7.26-7.21  | H6-H7            |
| 7  | 7.26-7.21  | H6-H7, H8-H7     |
| 8  | 7.19-7.13  | H8-H7            |
| 9  | 7.61       | H9-H10           |
| 10 | 6.71       | H9-H10, H10-H11  |
| 11 | 6.58-6.50  | H10-H11, H11-H12 |
| 12 | 7.80-7.75  | H11-H12          |

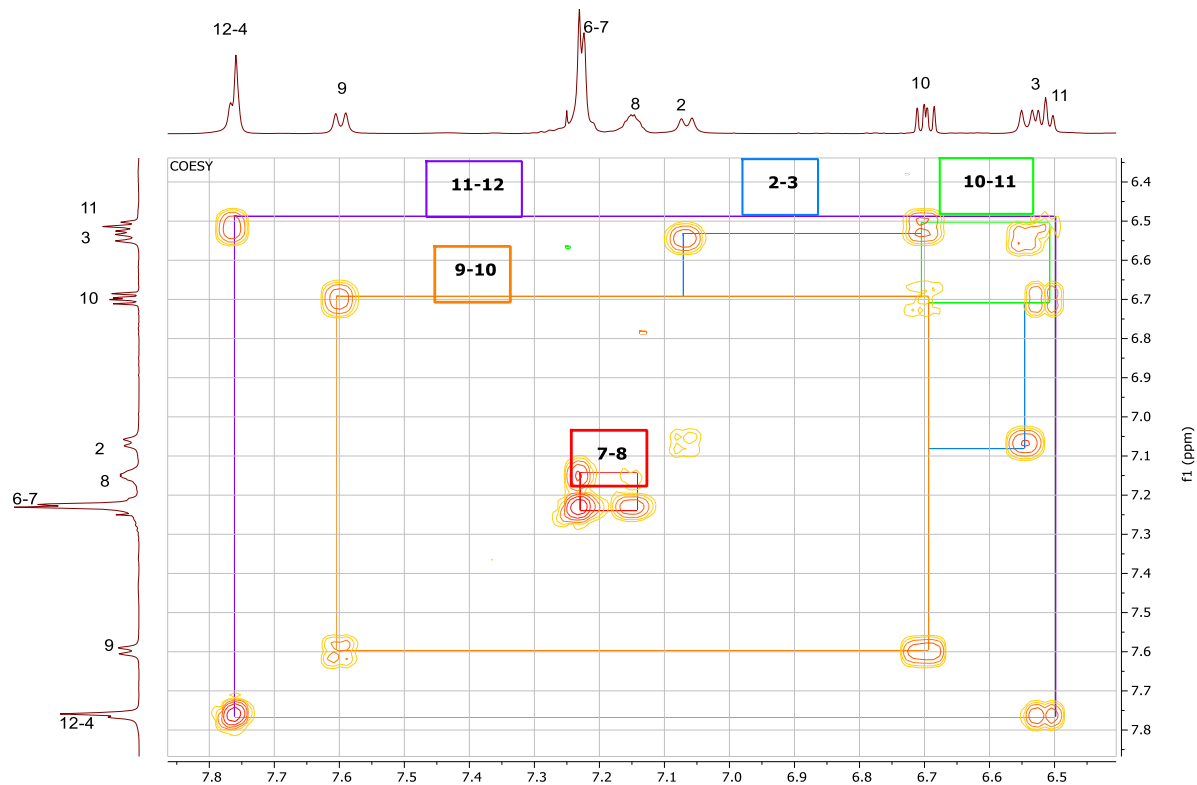

# NOESY spectrum of compound 3a (CDCl<sub>3</sub>)

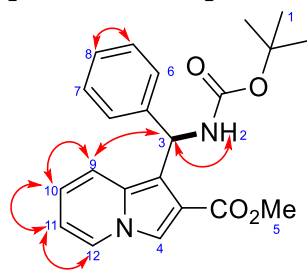

| H  | $\delta$ H | H-H              |
|----|------------|------------------|
| 2  | 7.08       | H2-H3            |
| 3  | 6.58-6.50  | H2-H3; H3-H9     |
| 7  | 7.26-7.21  | H8-H7            |
| 8  | 7.19-7.13  | H8-H7            |
| 9  | 7.61       | H9-H10; H3-H9    |
| 10 | 6.71       | H9-H10; H10-H11  |
| 11 | 6.58-6.50  | H11-H12; H10-H11 |
| 12 | 7.80-7.75  | H11-H12          |

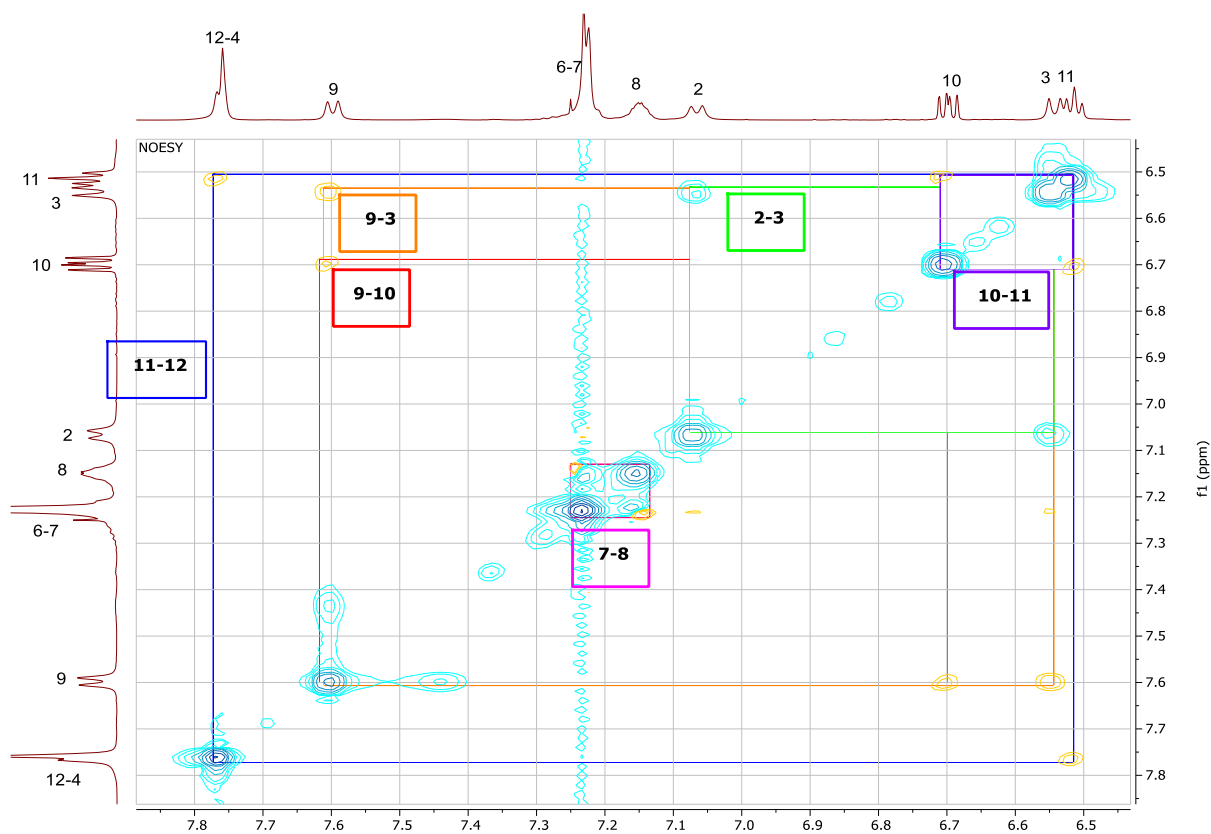

# HSQC spectrum of compound 3a (CDCl<sub>3</sub>)

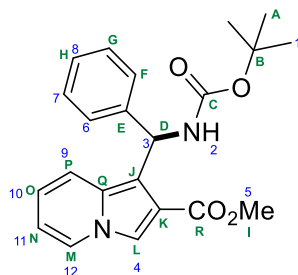

| C | H  | $\delta C$ | $\delta H$ |
|---|----|------------|------------|
| A | 1  | 28.6       | 1.48       |
| D | 3  | 48.9       | 6.58-6.50  |
| F | 6  | 126.1      | 7.26-7.21  |
| G | 7  | 128.1      | 7.26-7.21  |
| H | 8  | 126.5      | 7.19-7.13  |
| I | 5  | 51.6       | 3.73       |
| P | 9  | 118.5      | 7.61       |
| O | 10 | 118.7      | 6.71       |
| N | 11 | 112.8      | 6.58-6.50  |
| M | 12 | 125.2      | 7.80-7.75  |

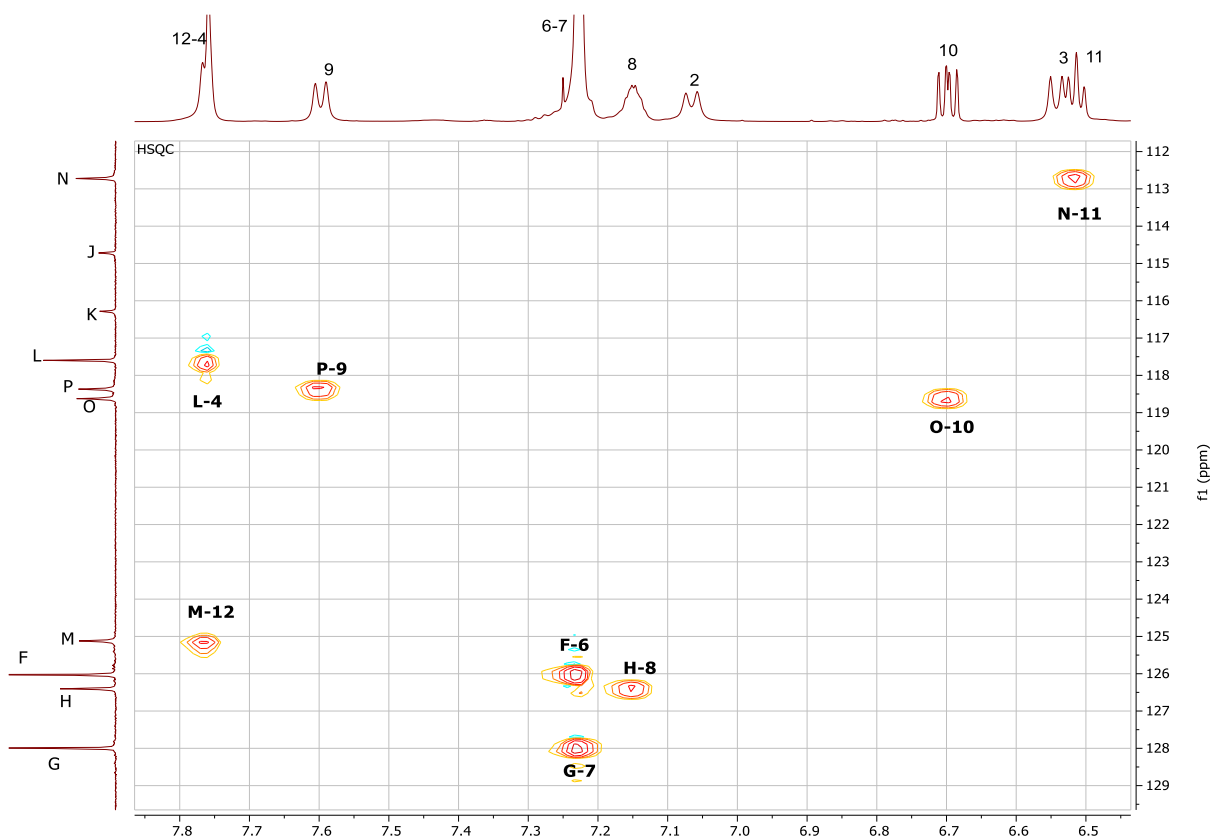

# HMBC spectrum of compound 3a (CDCl<sub>3</sub>)

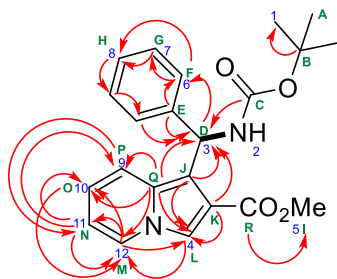

| CH | $\delta$ C | $\delta$ H | $^2J_{CH}$ | $^3J_{CH}$    |
|----|------------|------------|------------|---------------|
| D  | 48.9       | 6.58-6.50  |            | H6            |
| N  | 112.8      | 6.58-6.50  | H10;H12    | H9            |
| L  | 117.7      | 7.77       |            | H12           |
| O  | 118.7      | 6.71       |            | H12           |
| P  | 118.5      | 7.61       |            | H11           |
| M  | 125.2      | 7.80-7.75  | H10        | H4;H11        |
| F  | 126.1      | 7.26-7.21  | H7         | H3;F8         |
| H  | 126.5      | 7.19-7.13  | H7         |               |
| G  | 128.1      | 7.26-7.21  | H6;H8      |               |
| C  | $\delta$ C | $\delta$ H | $^2J_{CH}$ | $^3J_{CH}$    |
| B  | 79.2       |            | H1         |               |
| J  | 114.8      |            | H3         | H4            |
| K  | 116.4      |            | H4         | H3            |
| Q  | 131.3      |            | H9         | H3;H4;H10;H12 |
| E  | 143.1      |            | H3;H6      |               |
|    |            |            |            |               |
| C  | 156.0      |            |            | H3            |
| R  | 165.9      |            |            | H5            |

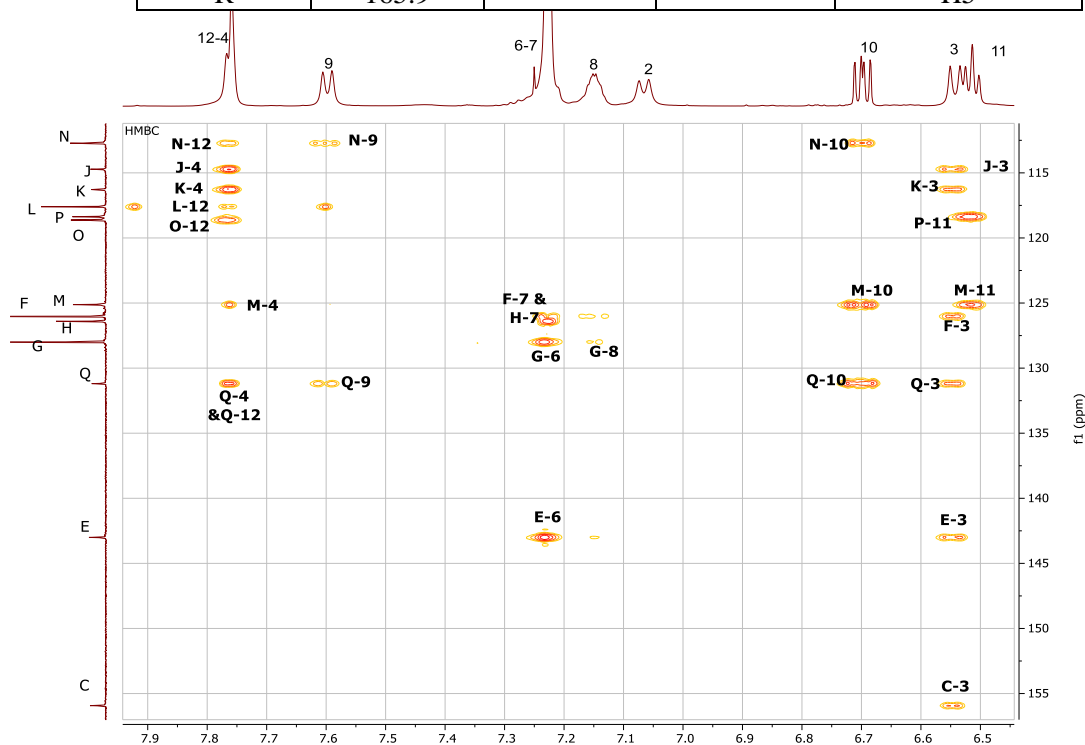



# HMBC-N spectrum of compound 3a (CDCl<sub>3</sub>)

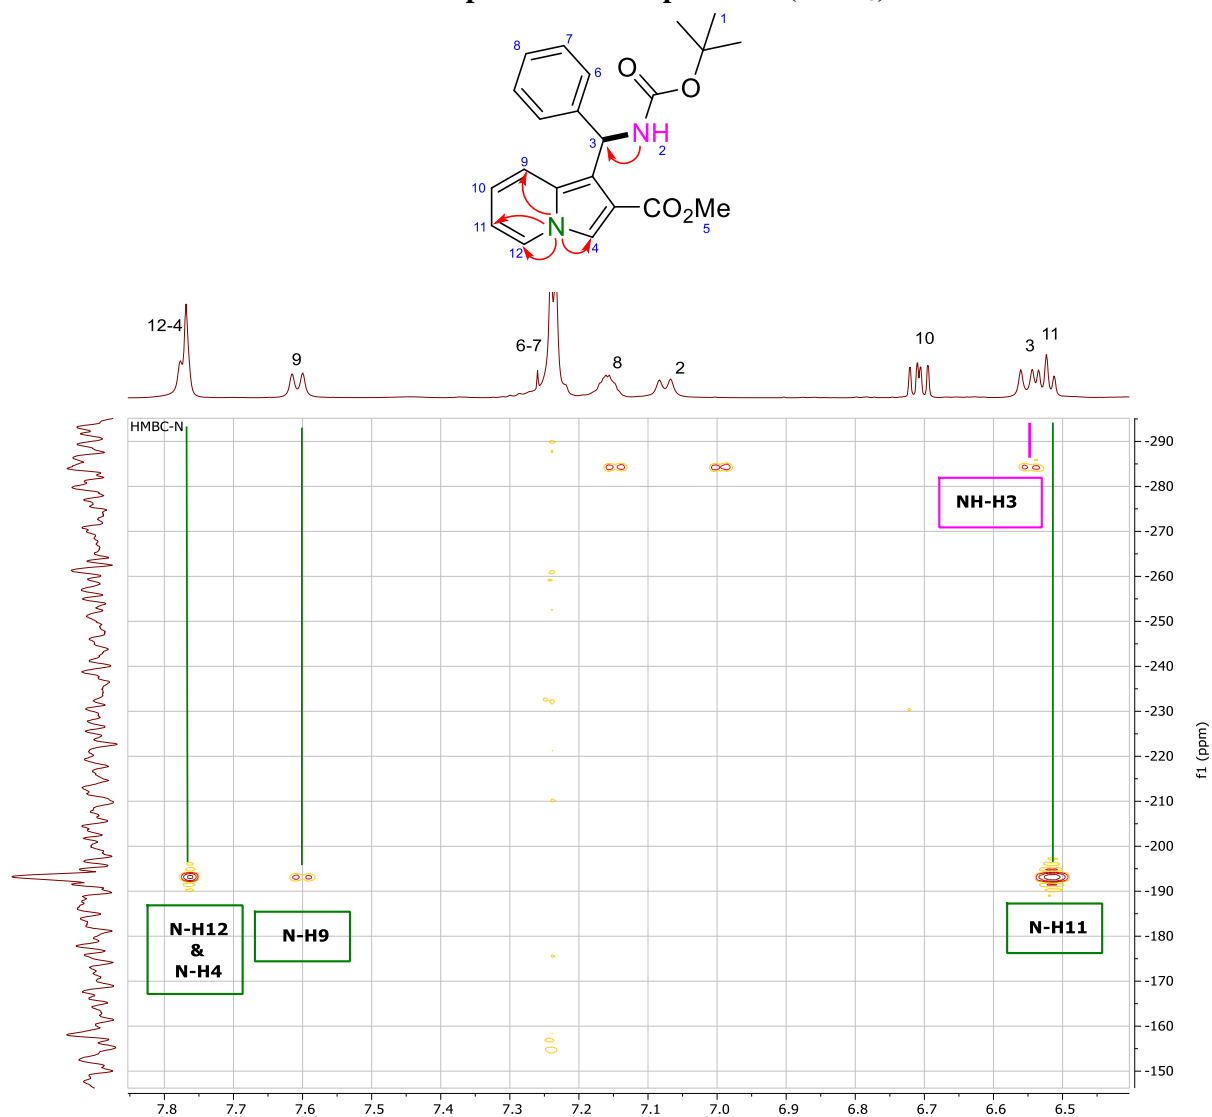

HSQC-N spectrum of compound 3a (CDCl<sub>3</sub>)

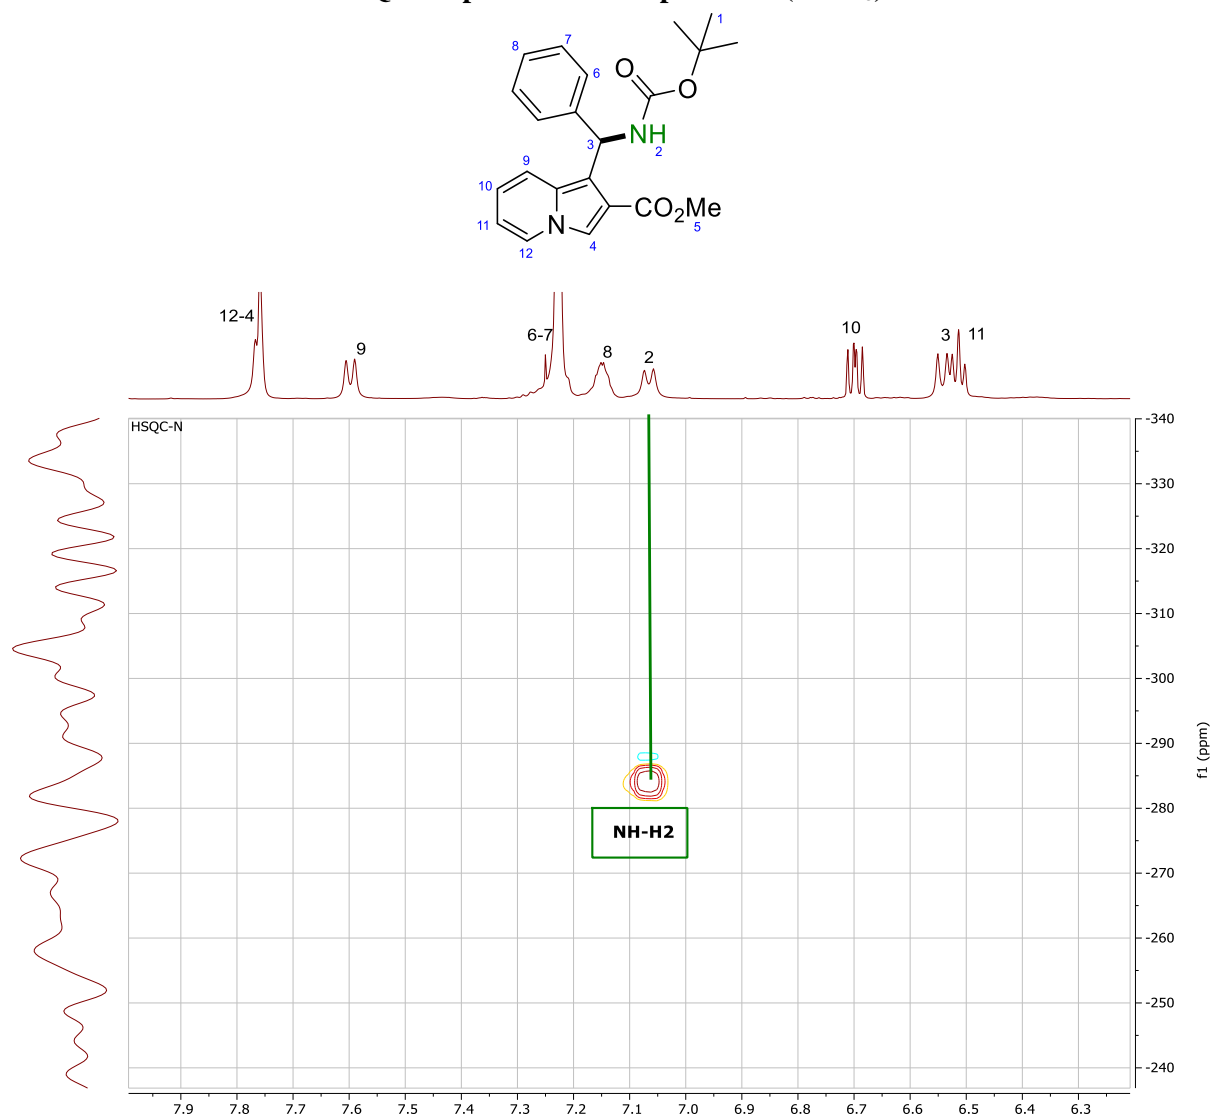

### 6.6.2. Compound 4a

<sup>1</sup>H NMR spectrum of compound 4a (CDCl<sub>3</sub>, 600 MHz)

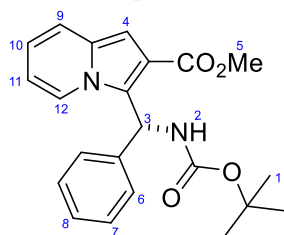

| H  | δH        |
|----|-----------|
| 1  | 1.46      |
| 2  | 7.31-7.18 |
| 3  | 6.76      |
| 4  | 6.92      |
| 5  | 3.80      |
| 6  | 7.16      |
| 7  | 7.31-7.18 |
| 8  | 7.31-7.18 |
| 9  | 7.40      |
| 10 | 6.72      |
| 11 | 6.61-6.57 |
| 12 | 8.06      |

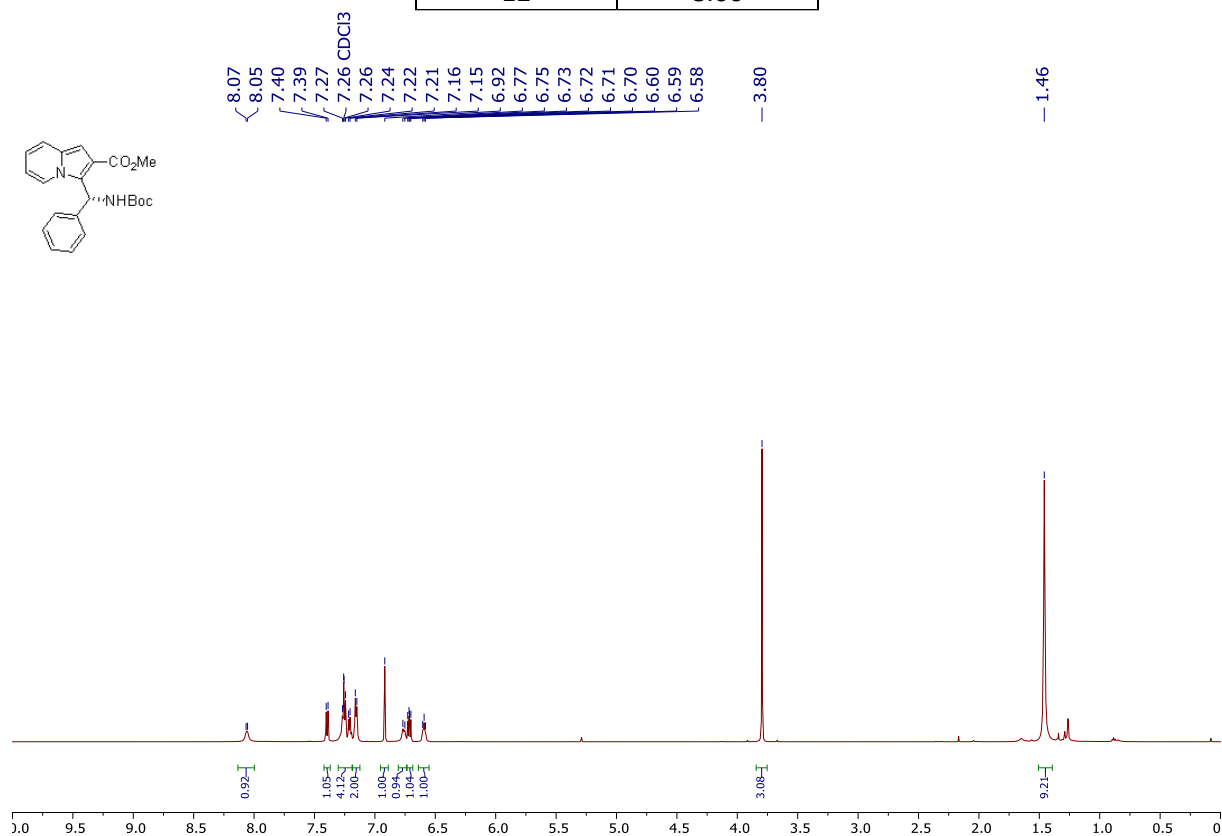

**$^{13}\text{C}$  NMR spectrum of compound 4a ( $\text{CDCl}_3$ , 151 MHz)**

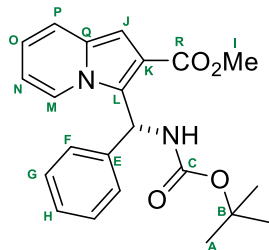

| C | $\delta\text{C}$ |
|---|------------------|
| A | 28.6             |
| B | 79.8             |
| C | 156.1            |
| D | 48.7             |
| E | 140.5            |
| F | 126.1            |
| G | 128.6            |
| H | 127.3            |
| I | 51.9             |
| J | 102.2            |
| K | 128.2            |
| L | 116.8            |
| M | 122.4            |
| N | 113.1            |
| O | 118.2            |
| P | 120.7            |
| Q | 131.7            |
| R | 166.4            |

$\delta\text{C}$  values: 166.4, 156.1, 140.5, 131.7, 128.6, 128.2, 127.3, 126.1, 122.4, 120.7, 118.2, 116.8, 113.1, 102.2, 79.8, 77.4, 77.2, 76.9, 51.9, 48.7, 28.6.

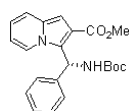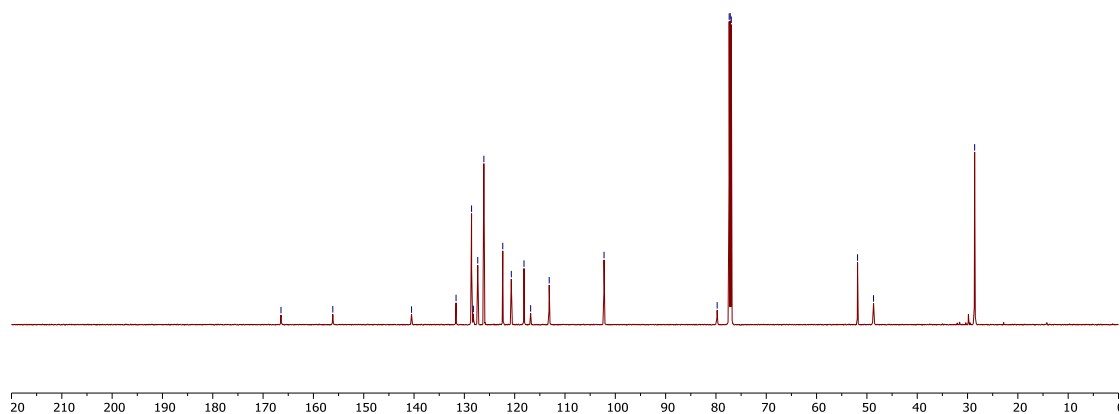

**COSY spectrum of compound 4a (CDCl<sub>3</sub>)**

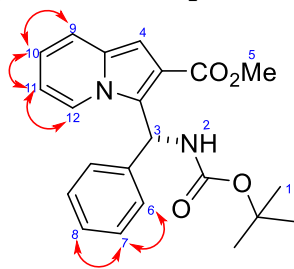

| H  | $\delta$ H | $^3J_{H-H}$     |
|----|------------|-----------------|
| 6  | 7.16       | H6-H7           |
| 7  | 7.31-7.18  | H6-H7;H7-H8     |
| 8  | 7.31-7.18  | H7-H8           |
| 9  | 7.40       | H9-H10          |
| 10 | 6.72       | H9-H10;H10-H11  |
| 11 | 6.61-6.57  | H10-H11;H11-H12 |
| 12 | 8.06       | H11-H12         |

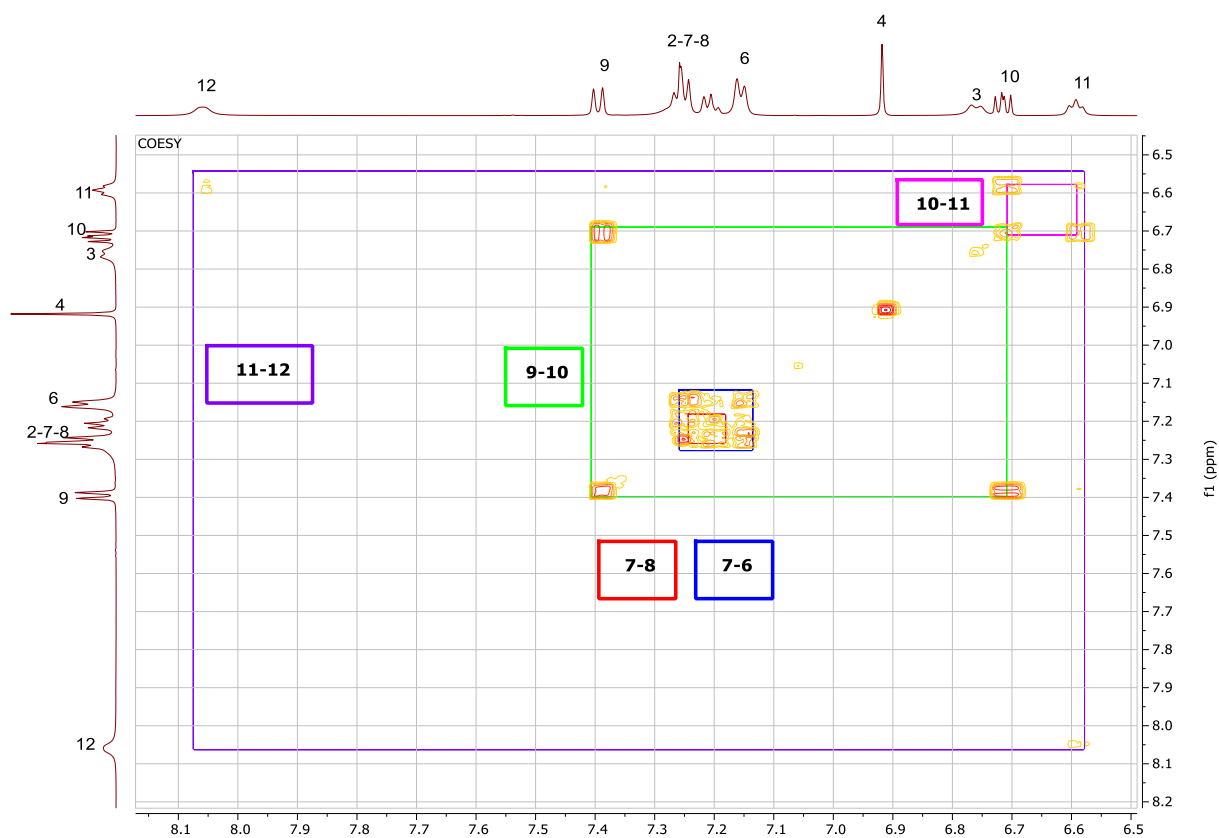

NOESY spectrum of compound 4a (CDCl<sub>3</sub>)

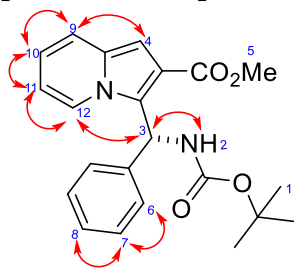

| H  | $\delta$ H | H-H             |
|----|------------|-----------------|
| 2  | 7.31-7.18  | H2-H3           |
| 3  | 6.76       | H2-H3; H3-H12   |
| 4  | 6.92       | H4-H9           |
| 6  | 7.16       | H6-H7           |
| 7  | 7.31-7.18  | H6-H7;H7-H8     |
| 8  | 7.31-7.18  | H7-H8           |
| 9  | 7.40       | H4-H9;H9-H10    |
| 10 | 6.72       | H9-H10;H10-H11  |
| 11 | 6.61-6.57  | H10-H11;H11-H12 |
| 12 | 8.06       | H3-H12;H11-H12  |

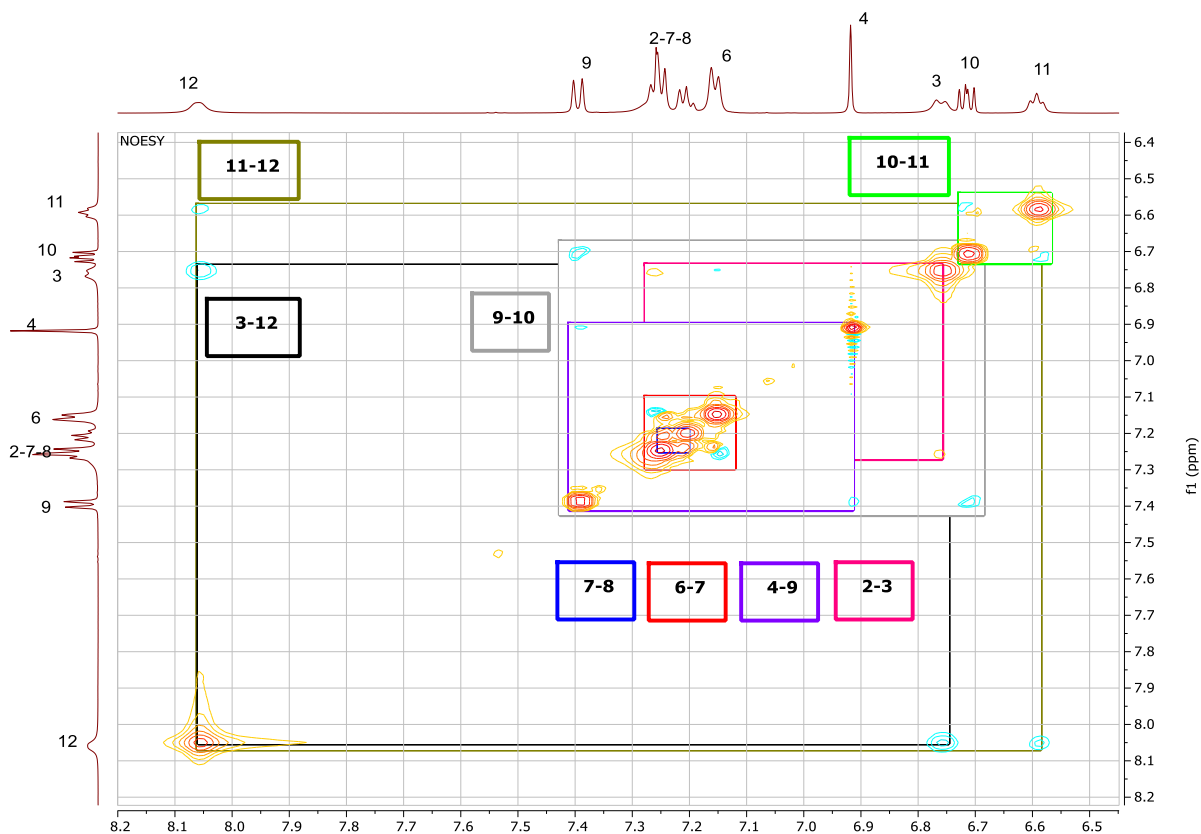

# HSQC spectrum of compound 4a (CDCl<sub>3</sub>)

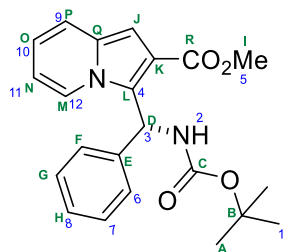

| C | H  | $\delta_C$ | $\delta_H$ |
|---|----|------------|------------|
| A | 1  | 28.6       | 1.46       |
| D | 3  | 48.7       | 6.76       |
| I | 5  | 51.9       | 3.80       |
| J | 4  | 102.2      | 6.92       |
| N | 11 | 113.1      | 6.61-6.57  |
| O | 10 | 118.1      | 6.72       |
| P | 9  | 120.7      | 7.40       |
| M | 12 | 122.4      | 8.06       |
| F | 6  | 126.1      | 7.16       |
| H | 8  | 127.3      | 7.31-7.18  |
| G | 7  | 128.6      | 7.31-7.18  |

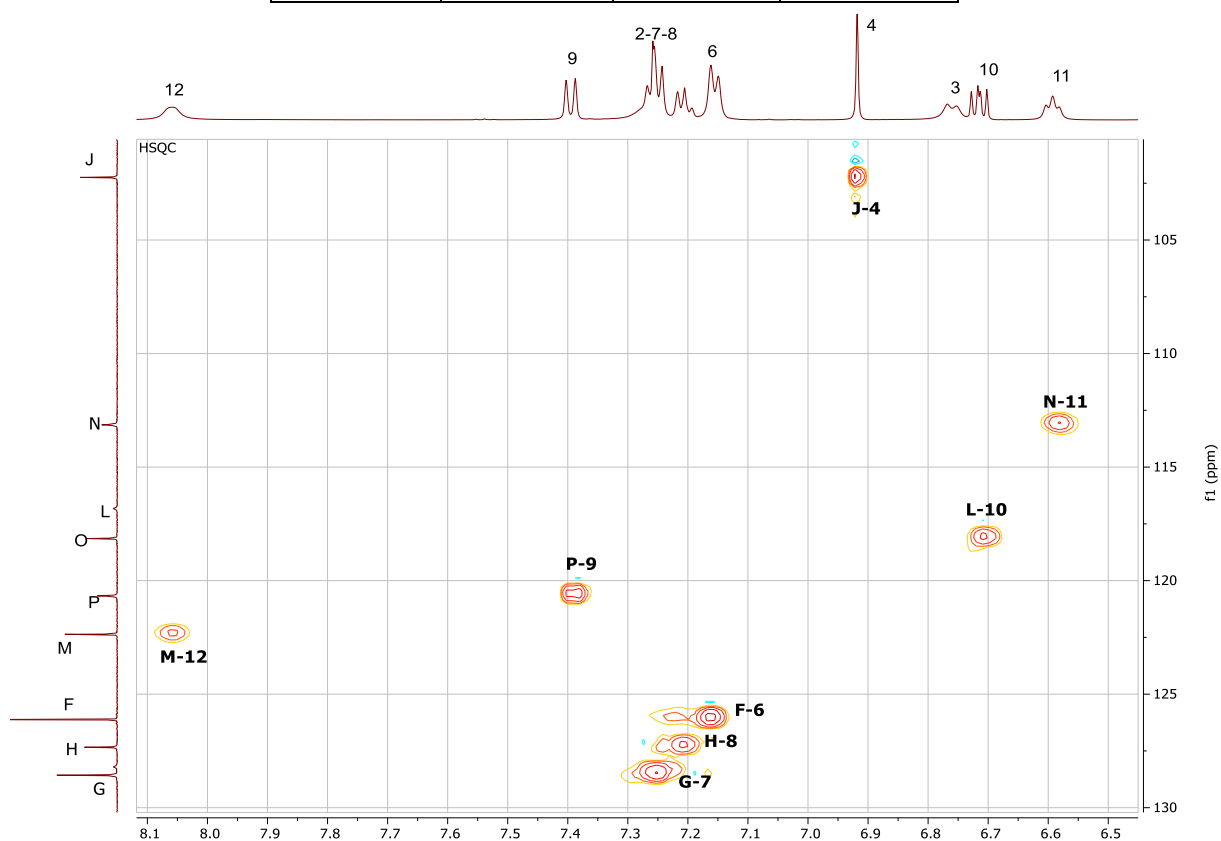

# HMBC spectrum of compound 4a (CDCl<sub>3</sub>)

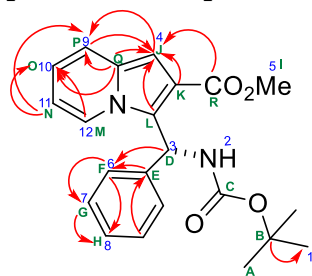

| CH | $\delta$ C | $\delta$ H | $^2J_{CH}$ | $^3J_{CH}$ |
|----|------------|------------|------------|------------|
| J  | 102.2      | 6.92       |            | H9         |
| N  | 113.1      | 6.61-6.57  | H10        | H9         |
| P  | 120.7      | 7.40       |            | H4         |
| M  | 122.4      | 8.06       |            | H10        |
| F  | 126.1      | 7.16       | H7         | H8         |
| H  | 127.3      | 7.31-7.18  |            | H6         |
| G  | 128.6      | 7.31-7.18  | H8         |            |
| C  | $\delta$ C | $\delta$ H | $^2J_{CH}$ | $^3J_{CH}$ |
| B  | 79.8       |            | H1         |            |
| L  | 116.8      |            |            | H4         |
| K  | 128.2      |            | H4         |            |
| Q  | 131.7      |            | H4;H9      | H10        |
| E  | 140.5      |            | H6         |            |
| R  | 166.4      |            |            | H4;H5      |

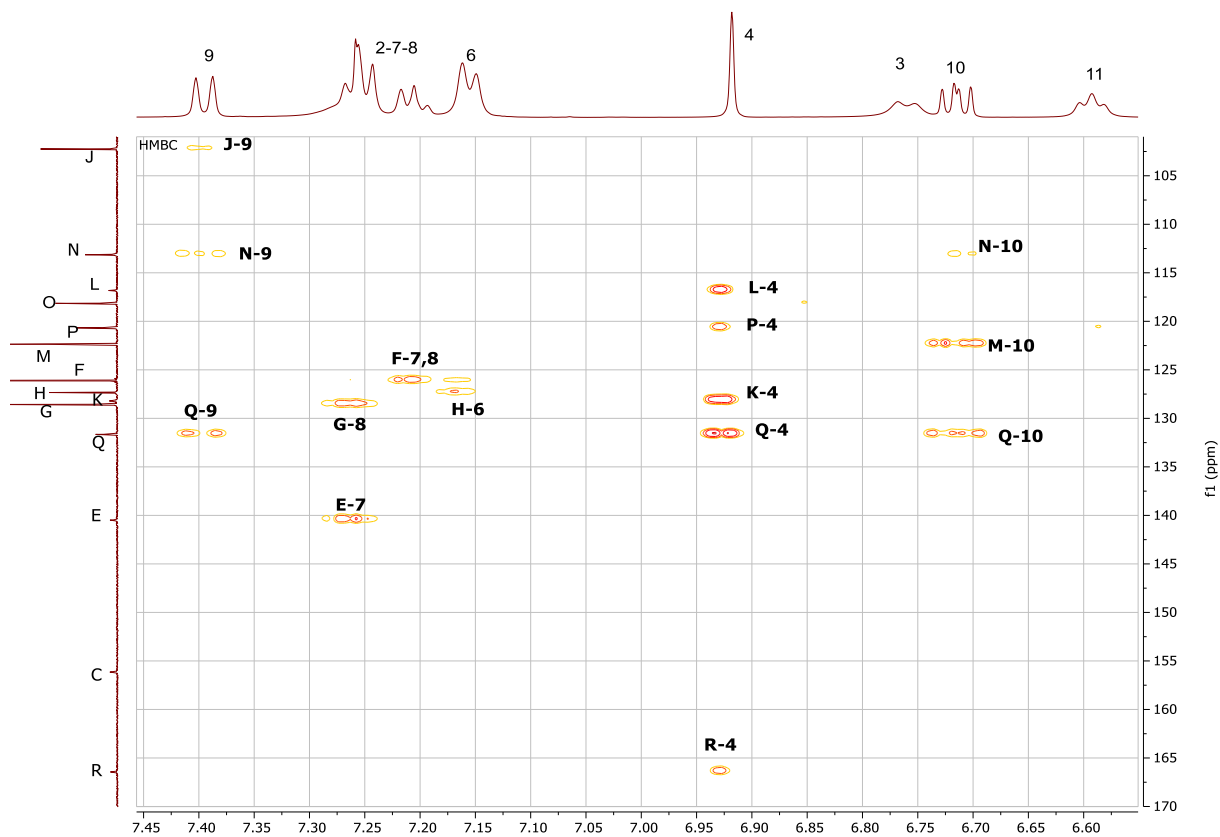



# HMBC-N spectrum of compound 4a (CDCl<sub>3</sub>)

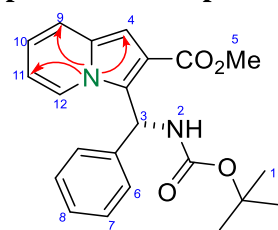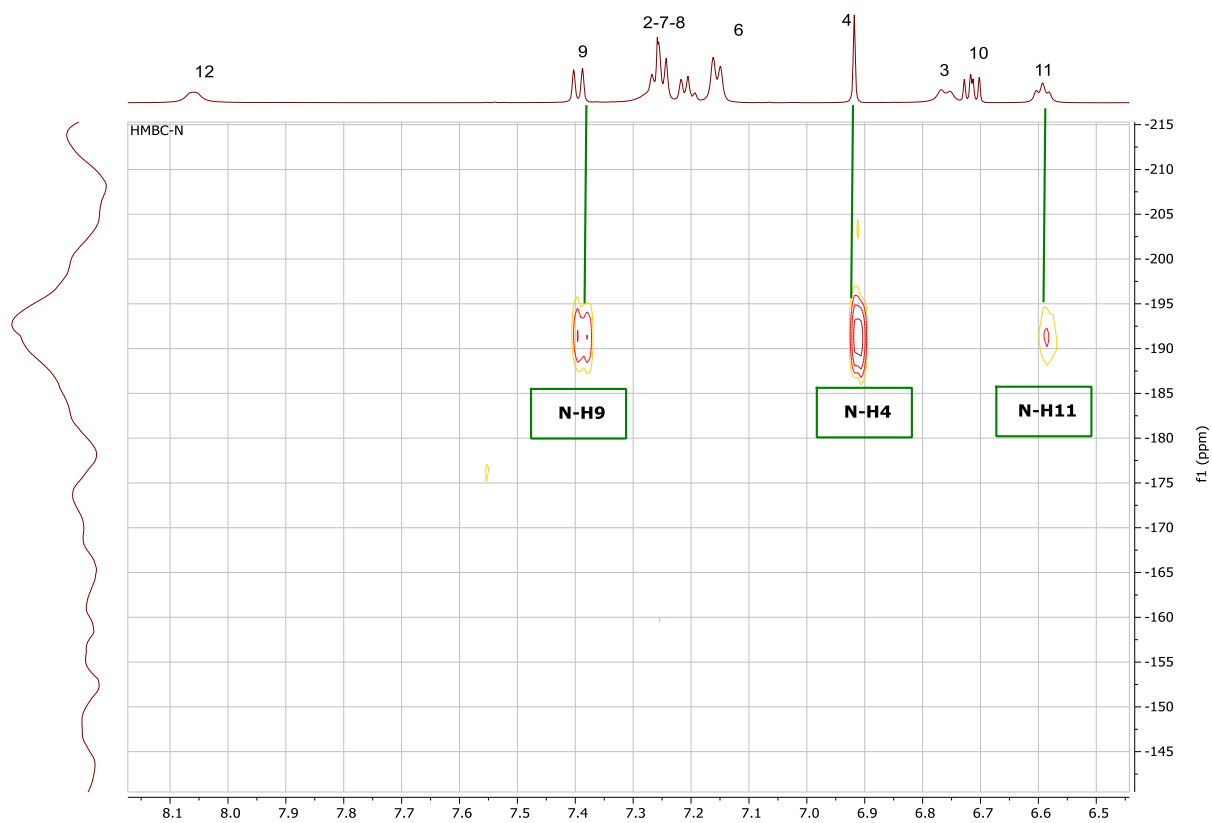

HSQC-N spectrum of compound 4a (CDCl<sub>3</sub>)

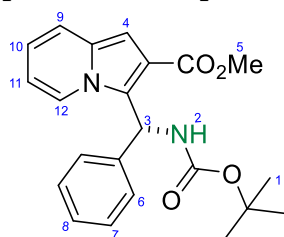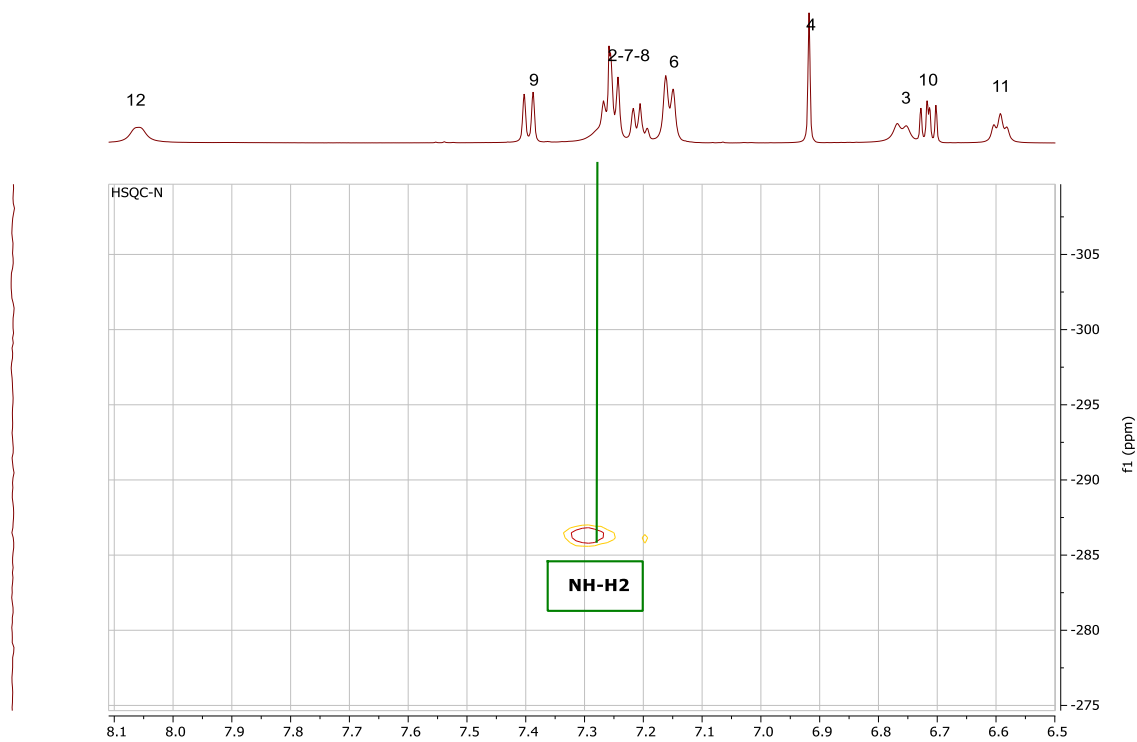

## 8. HPLC Chiral spectra

### 8.1. Products with Boc-protecting group 3a-s, 4a-s and 10

Chiral HPLC chromatogram of racemic 4a

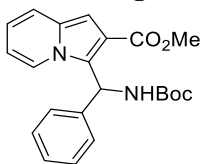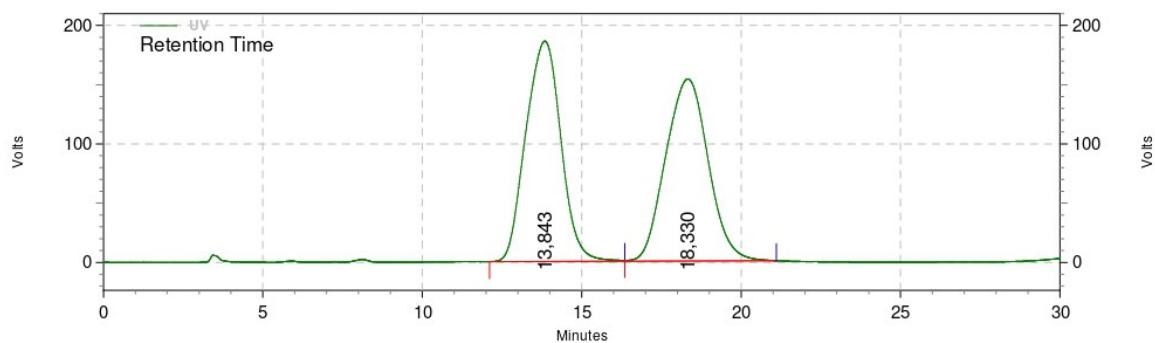

#### UV Results

| Retention Time | Area     | Area % | Height | Height % |
|----------------|----------|--------|--------|----------|
| 13,843         | 57015316 | 50,00  | 744080 | 54,75    |
| 18,330         | 57017925 | 50,00  | 614933 | 45,25    |

|        |           |        |         |        |
|--------|-----------|--------|---------|--------|
| Totals | 114033241 | 100,00 | 1359013 | 100,00 |
|--------|-----------|--------|---------|--------|

Chiral HPLC chromatogram of chiral 4a

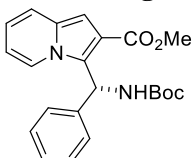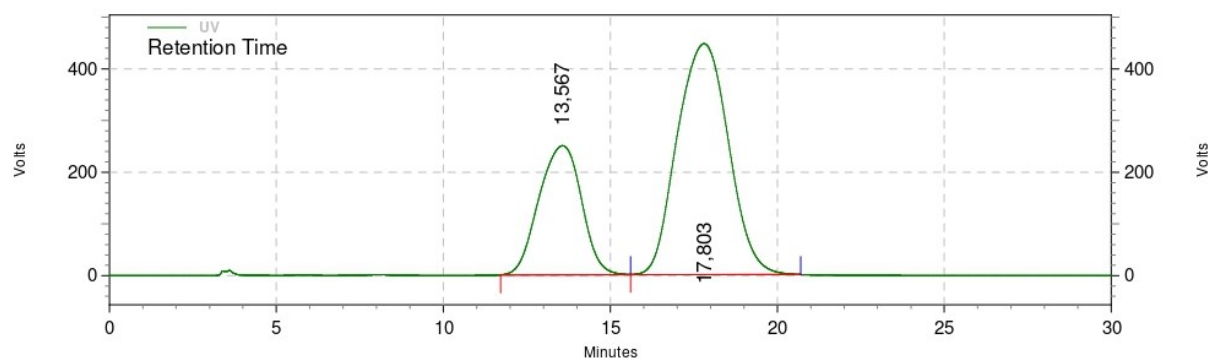

#### UV Results

| Retention Time | Area      | Area % | Height  | Height % |
|----------------|-----------|--------|---------|----------|
| 13,567         | 88631047  | 31,66  | 999718  | 35,87    |
| 17,803         | 191344584 | 68,34  | 1787454 | 64,13    |

|        |           |        |         |        |
|--------|-----------|--------|---------|--------|
| Totals | 279975631 | 100,00 | 2787172 | 100,00 |
|--------|-----------|--------|---------|--------|

### Chiral HPLC chromatogram of racemic 3a

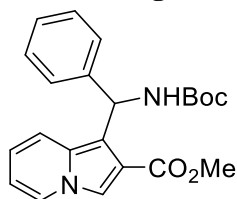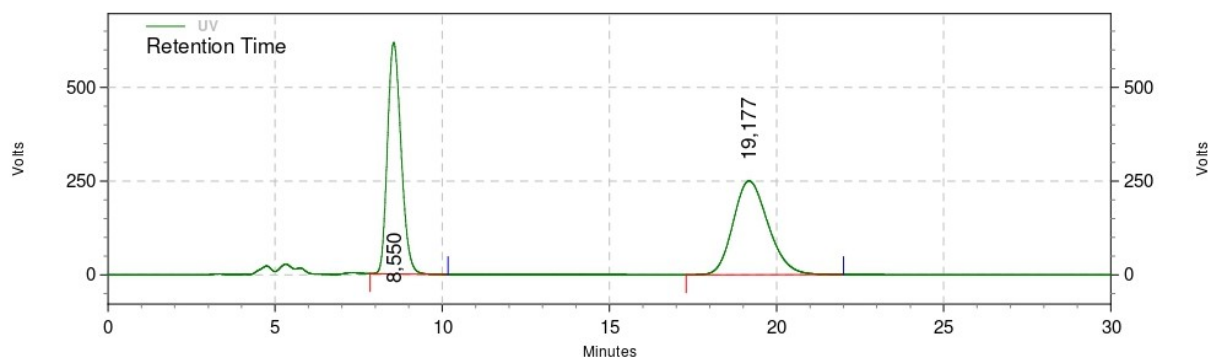

#### UV Results

| Retention Time | Area     | Area % | Height  | Height % |
|----------------|----------|--------|---------|----------|
| 8,550          | 69984599 | 48,97  | 2470174 | 71,15    |
| 19,177         | 72928830 | 51,03  | 1001623 | 28,85    |

|        |           |        |         |        |
|--------|-----------|--------|---------|--------|
| Totals | 142913429 | 100,00 | 3471797 | 100,00 |
|--------|-----------|--------|---------|--------|

### Chiral HPLC chromatogram of chiral 3a

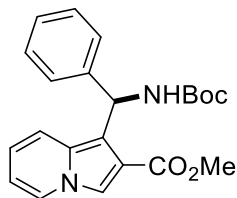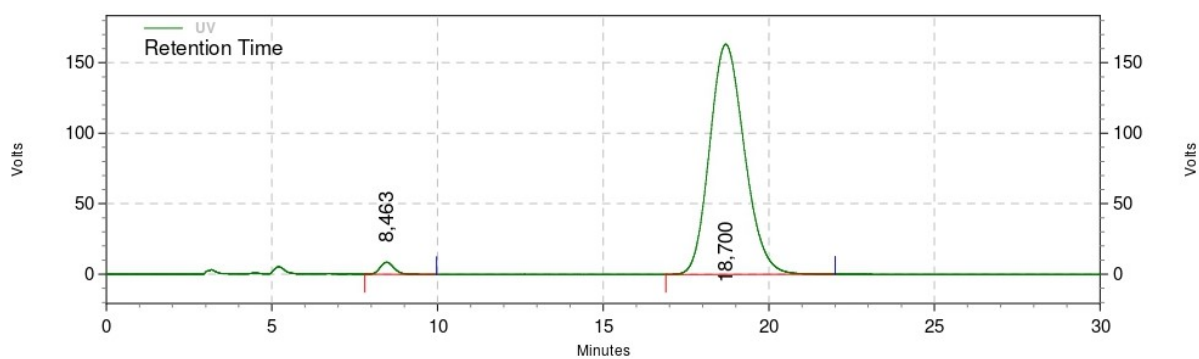

#### UV Results

| Retention Time | Area     | Area % | Height | Height % |
|----------------|----------|--------|--------|----------|
| 8,463          | 1001400  | 2,06   | 34069  | 4,96     |
| 18,700         | 47674180 | 97,94  | 653034 | 95,04    |

|        |          |        |        |        |
|--------|----------|--------|--------|--------|
| Totals | 48675580 | 100,00 | 687103 | 100,00 |
|--------|----------|--------|--------|--------|

### Chiral HPLC chromatogram of racemic 4a

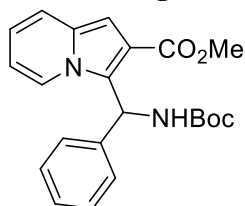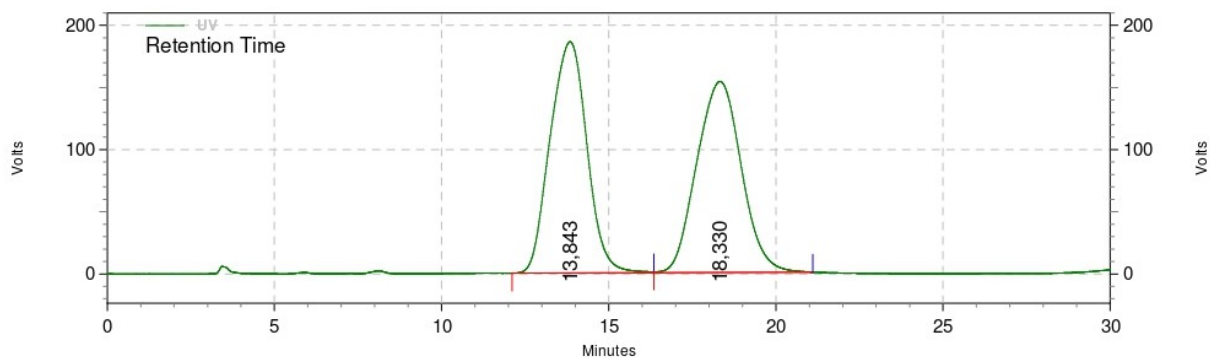

#### UV Results

| Retention Time | Area     | Area % | Height | Height % |
|----------------|----------|--------|--------|----------|
| 13,843         | 57015316 | 50,00  | 744080 | 54,75    |
| 18,330         | 57017925 | 50,00  | 614933 | 45,25    |

|        |           |        |         |        |
|--------|-----------|--------|---------|--------|
| Totals | 114033241 | 100,00 | 1359013 | 100,00 |
|--------|-----------|--------|---------|--------|

### Chiral HPLC chromatogram of chiral 4a (procedure B)

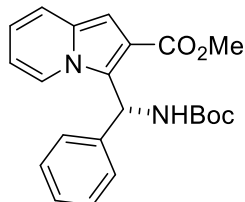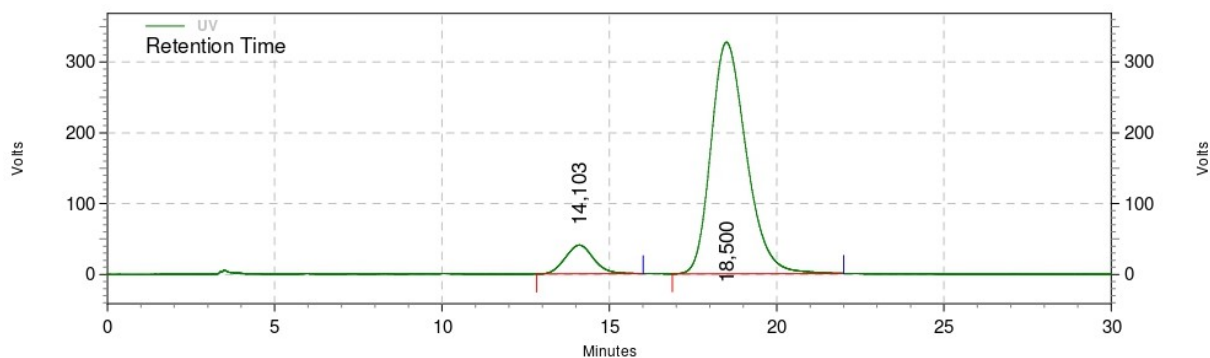

#### UV Results

| Retention Time | Area     | Area % | Height  | Height % |
|----------------|----------|--------|---------|----------|
| 14,103         | 9587778  | 9,10   | 162251  | 11,04    |
| 18,500         | 95796648 | 90,90  | 1307472 | 88,96    |

|        |           |        |         |        |
|--------|-----------|--------|---------|--------|
| Totals | 105384426 | 100,00 | 1469723 | 100,00 |
|--------|-----------|--------|---------|--------|

### Chiral HPLC chromatogram of racemic 4b

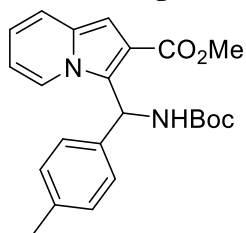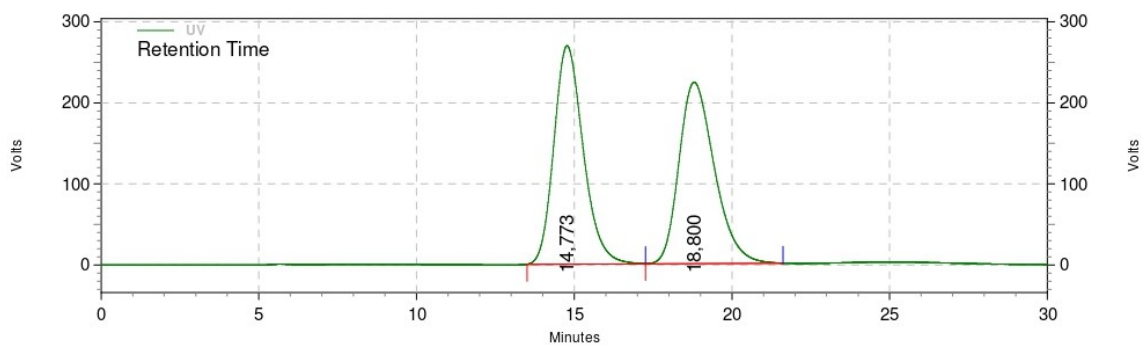

#### UV Results

| Retention Time | Area     | Area % | Height  | Height % |
|----------------|----------|--------|---------|----------|
| 14,773         | 69818719 | 50,00  | 1077547 | 54,62    |
| 18,800         | 69817369 | 50,00  | 895194  | 45,38    |

|        |           |        |         |        |
|--------|-----------|--------|---------|--------|
| Totals | 139636088 | 100,00 | 1972741 | 100,00 |
|--------|-----------|--------|---------|--------|

### Chiral HPLC chromatogram of chiral 4b

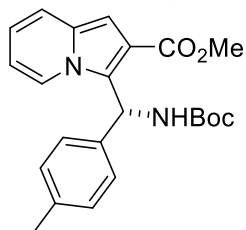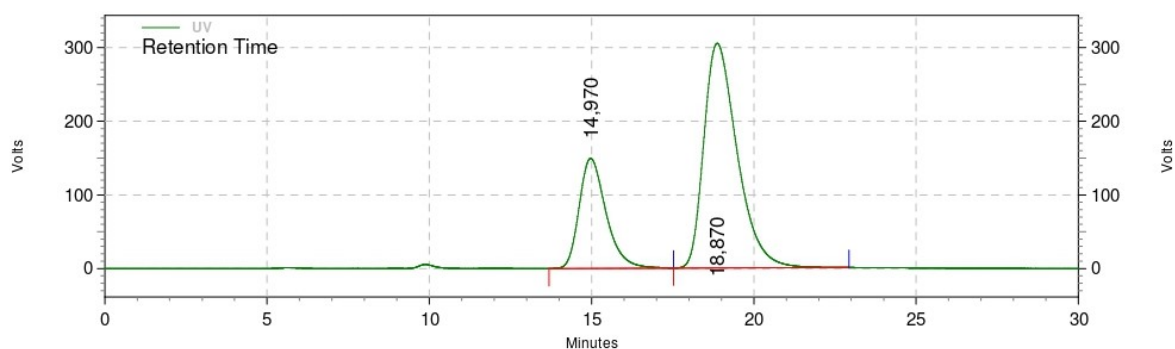

#### UV Results

| Retention Time | Area     | Area % | Height  | Height % |
|----------------|----------|--------|---------|----------|
| 14,970         | 34421300 | 28,31  | 598360  | 32,91    |
| 18,870         | 87168179 | 71,69  | 1219979 | 67,09    |

|        |           |        |         |        |
|--------|-----------|--------|---------|--------|
| Totals | 121589479 | 100,00 | 1818339 | 100,00 |
|--------|-----------|--------|---------|--------|

### Chiral HPLC chromatogram of racemic 3b

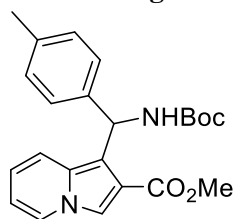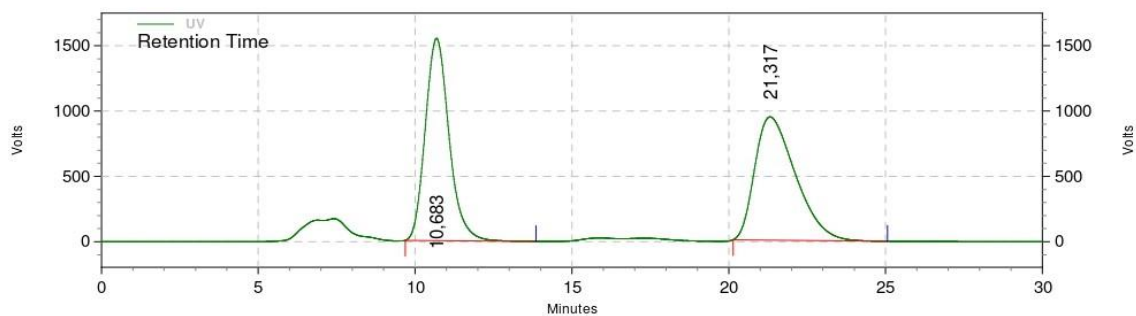

#### UV Results

| Retention Time | Area      | Area % | Height  | Height % |
|----------------|-----------|--------|---------|----------|
| 10,683         | 326551193 | 49,01  | 6190814 | 62,14    |
| 21,317         | 339798926 | 50,99  | 3771438 | 37,86    |
| Totals         | 666350119 | 100,00 | 9962252 | 100,00   |

### Chiral HPLC chromatogram of chiral 3b

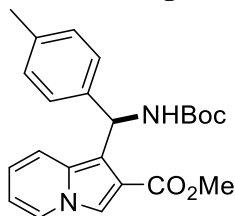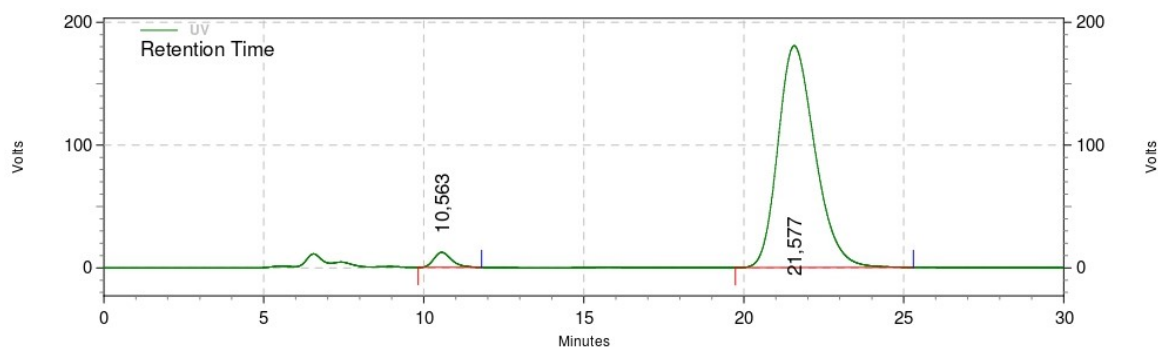

#### UV Results

| Retention Time | Area     | Area % | Height | Height % |
|----------------|----------|--------|--------|----------|
| 10,563         | 1917542  | 3,19   | 49113  | 6,37     |
| 21,577         | 58159709 | 96,81  | 722343 | 93,63    |
| Totals         | 60077251 | 100,00 | 771456 | 100,00   |

### Chiral HPLC chromatogram of racemic 4c

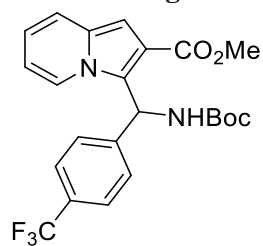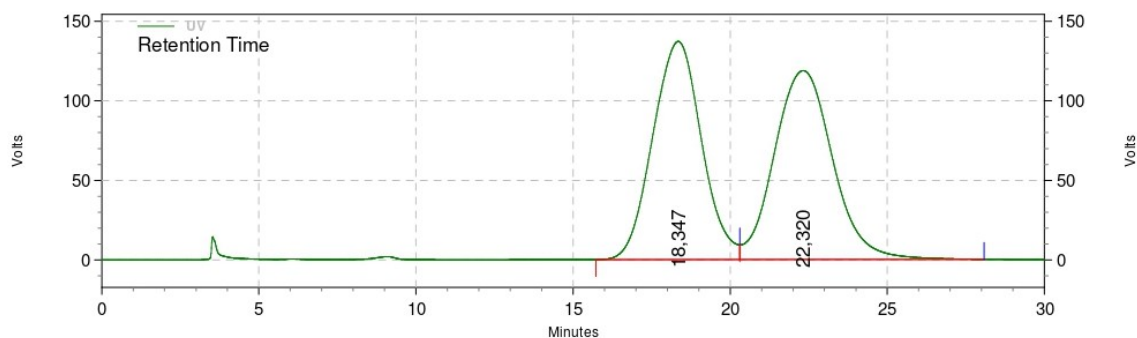

#### UV Results

| Retention Time | Area      | Area % | Height  | Height % |
|----------------|-----------|--------|---------|----------|
| 18,347         | 59155829  | 49,19  | 547905  | 53,59    |
| 22,320         | 61096077  | 50,81  | 474464  | 46,41    |
| Totals         | 120251906 | 100,00 | 1022369 | 100,00   |

### Chiral HPLC chromatogram of chiral 4c

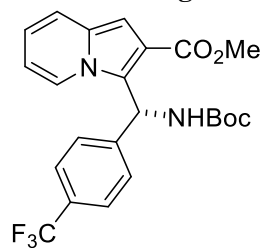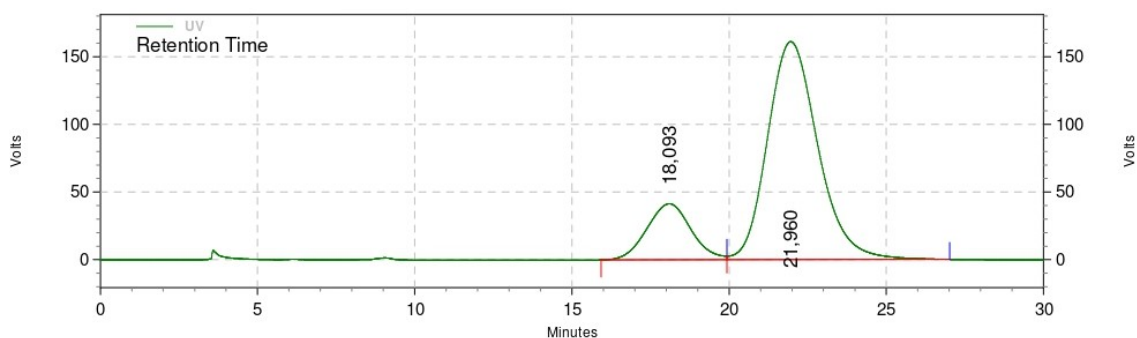

#### UV Results

| Retention Time | Area     | Area % | Height | Height % |
|----------------|----------|--------|--------|----------|
| 18,093         | 16183126 | 18,42  | 165826 | 20,47    |
| 21,960         | 71680645 | 81,58  | 644239 | 79,53    |
| Totals         | 87863771 | 100,00 | 810065 | 100,00   |



### Chiral HPLC chromatogram of racemic 3c

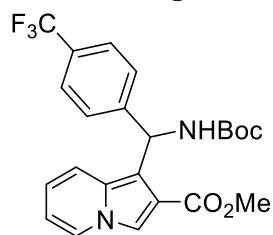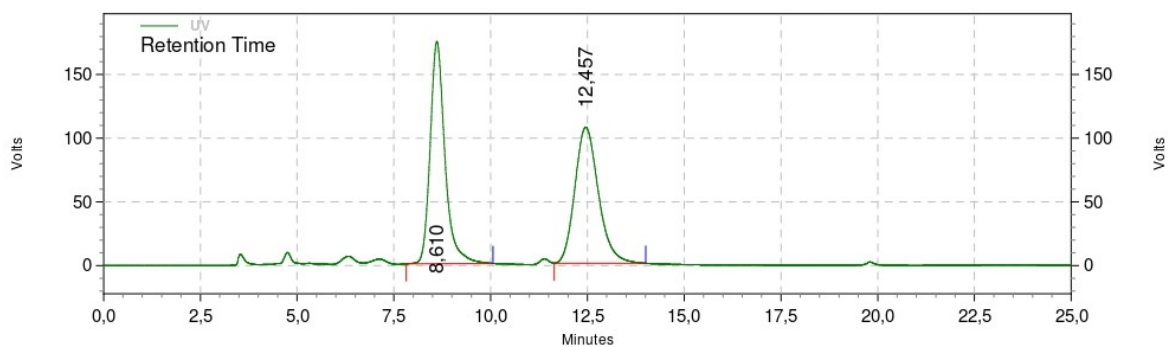

#### UV Results

| Retention Time | Area     | Area % | Height | Height % |
|----------------|----------|--------|--------|----------|
| 8,610          | 18564812 | 50,65  | 697950 | 62,01    |
| 12,457         | 18087139 | 49,35  | 427681 | 37,99    |

|        |          |        |         |        |
|--------|----------|--------|---------|--------|
| Totals | 36651951 | 100,00 | 1125631 | 100,00 |
|--------|----------|--------|---------|--------|

### Chiral HPLC chromatogram of chiral 3c

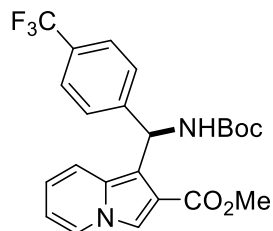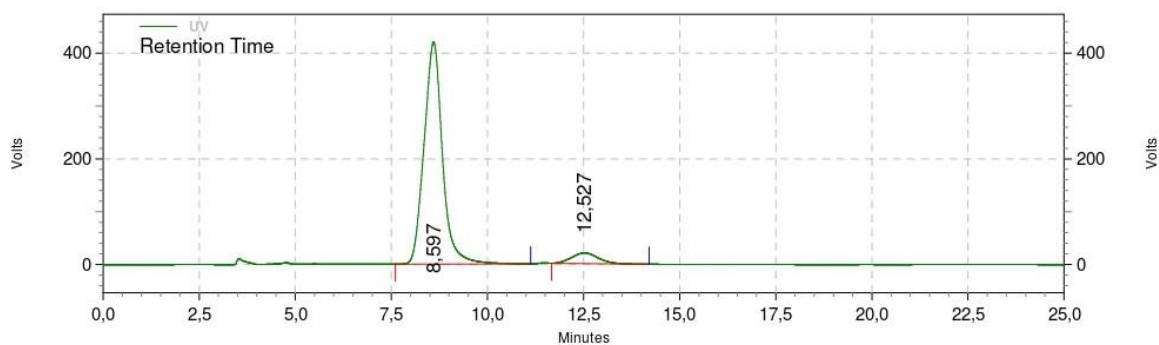

#### UV Results

| Retention Time | Area     | Area % | Height  | Height % |
|----------------|----------|--------|---------|----------|
| 8,597          | 56085747 | 93,45  | 1682161 | 95,41    |
| 12,527         | 3933280  | 6,55   | 80920   | 4,59     |

|        |          |        |         |        |
|--------|----------|--------|---------|--------|
| Totals | 60019027 | 100,00 | 1763081 | 100,00 |
|--------|----------|--------|---------|--------|

### Chiral HPLC chromatogram of racemic 4d

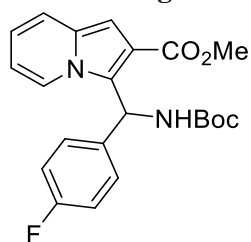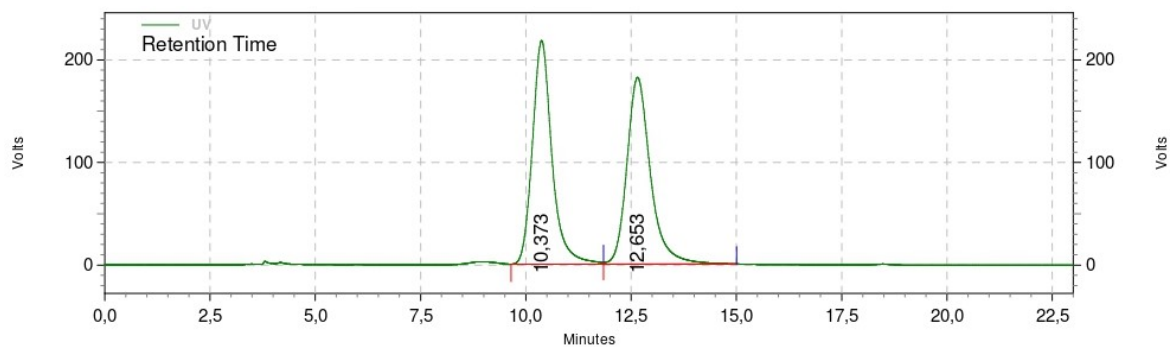

#### UV Results

| Retention Time | Area     | Area % | Height | Height % |
|----------------|----------|--------|--------|----------|
| 10,373         | 28194791 | 49,87  | 871453 | 54,50    |
| 12,653         | 28347419 | 50,13  | 727495 | 45,50    |

|        |          |        |         |        |
|--------|----------|--------|---------|--------|
| Totals | 56542210 | 100,00 | 1598948 | 100,00 |
|--------|----------|--------|---------|--------|

### Chiral HPLC chromatogram of chiral 4d

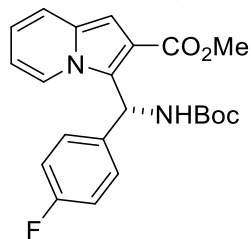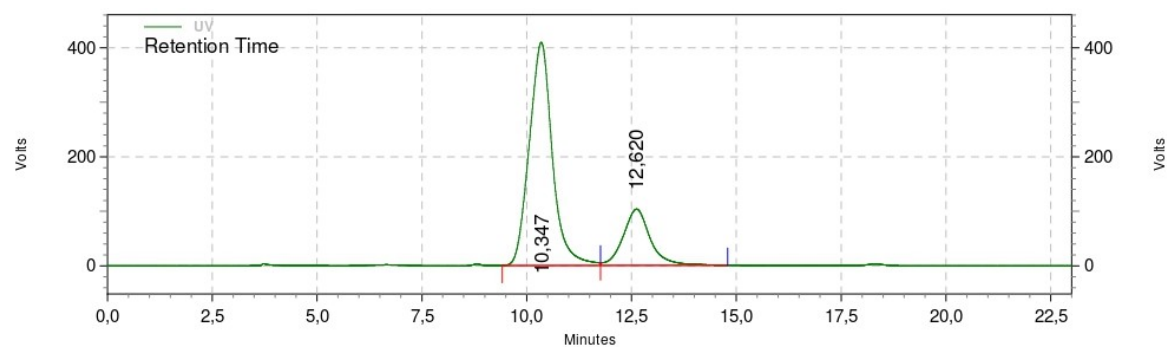

#### UV Results

| Retention Time | Area     | Area % | Height  | Height % |
|----------------|----------|--------|---------|----------|
| 10,347         | 62807919 | 77,19  | 1636167 | 79,84    |
| 12,620         | 18555046 | 22,81  | 413153  | 20,16    |

|        |          |        |         |        |
|--------|----------|--------|---------|--------|
| Totals | 81362965 | 100,00 | 2049320 | 100,00 |
|--------|----------|--------|---------|--------|

### Chiral HPLC chromatogram of racemic 3d

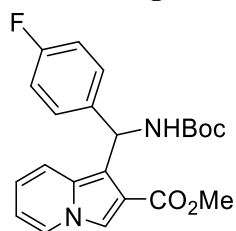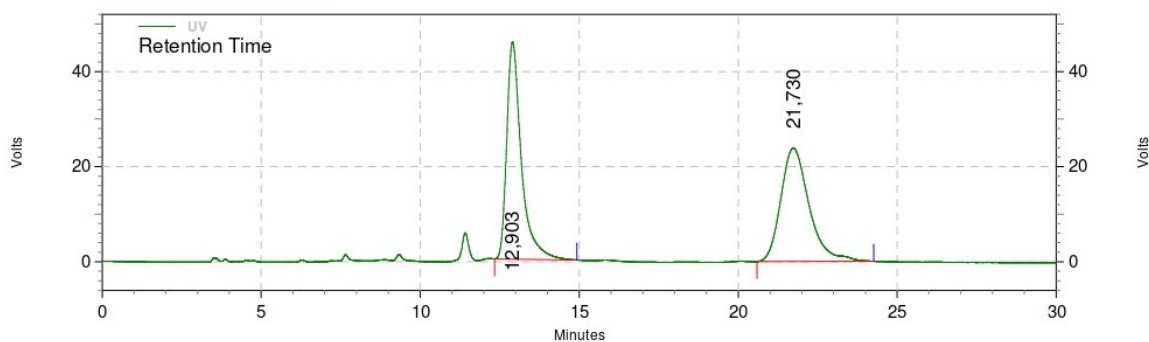

#### UV Results

| Retention Time | Area    | Area % | Height | Height % |
|----------------|---------|--------|--------|----------|
| 12,903         | 5836341 | 49,72  | 182886 | 65,69    |
| 21,730         | 5901016 | 50,28  | 95517  | 34,31    |

|        |          |        |        |        |
|--------|----------|--------|--------|--------|
| Totals | 11737357 | 100,00 | 278403 | 100,00 |
|--------|----------|--------|--------|--------|

### Chiral HPLC chromatogram of chiral 3d

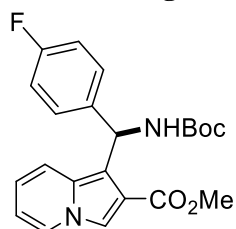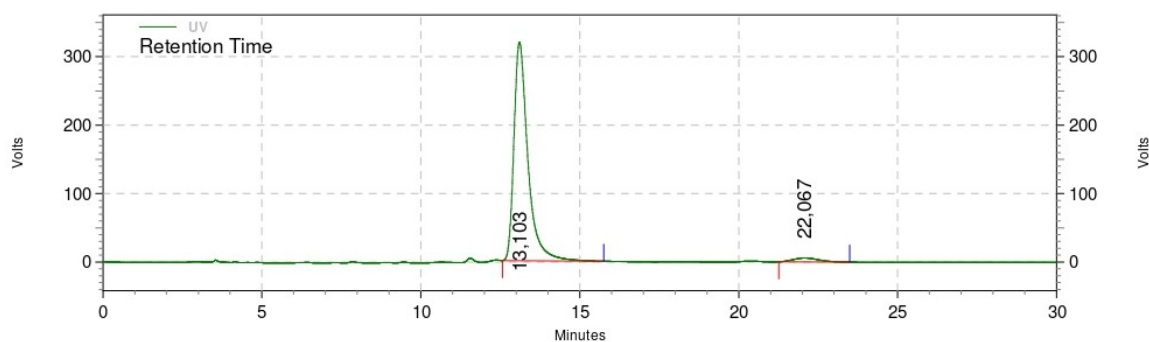

#### UV Results

| Retention Time | Area     | Area % | Height  | Height % |
|----------------|----------|--------|---------|----------|
| 13,103         | 39048408 | 96,84  | 1276314 | 98,25    |
| 22,067         | 1272773  | 3,16   | 22692   | 1,75     |

|        |          |        |         |        |
|--------|----------|--------|---------|--------|
| Totals | 40321181 | 100,00 | 1299006 | 100,00 |
|--------|----------|--------|---------|--------|

### Chiral HPLC chromatogram of racemic 4e

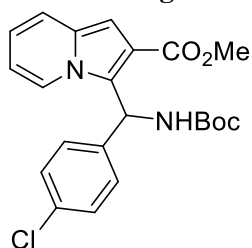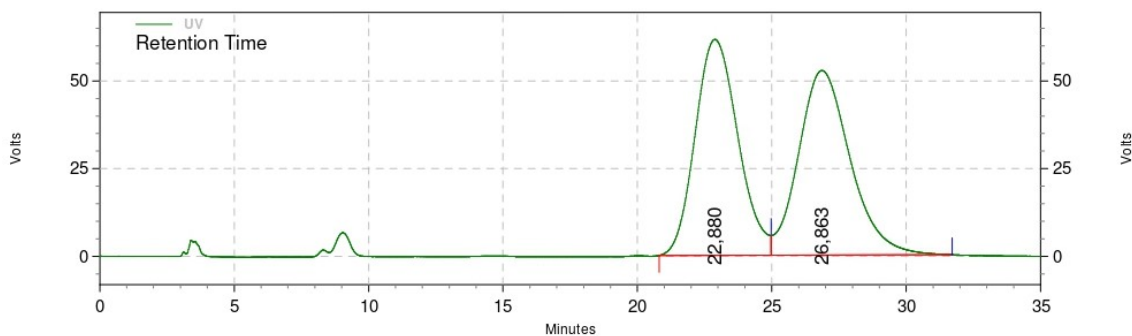

#### UV Results

| Retention Time | Area     | Area % | Height | Height % |
|----------------|----------|--------|--------|----------|
| 22,880         | 27251563 | 49,25  | 246034 | 53,92    |
| 26,863         | 28082220 | 50,75  | 210273 | 46,08    |

|        |          |        |        |        |
|--------|----------|--------|--------|--------|
| Totals | 55333783 | 100,00 | 456307 | 100,00 |
|--------|----------|--------|--------|--------|

### Chiral HPLC chromatogram of chiral 4e

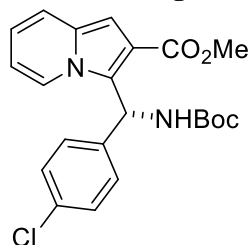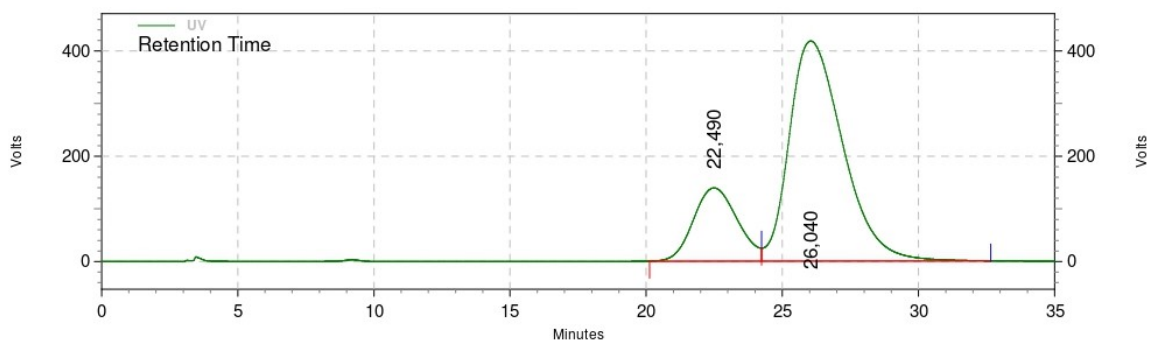

#### UV Results

| Retention Time | Area      | Area % | Height  | Height % |
|----------------|-----------|--------|---------|----------|
| 22,490         | 62179727  | 21,40  | 556255  | 24,97    |
| 26,040         | 228418982 | 78,60  | 1671880 | 75,03    |

|        |           |        |         |        |
|--------|-----------|--------|---------|--------|
| Totals | 290598709 | 100,00 | 2228135 | 100,00 |
|--------|-----------|--------|---------|--------|

### Chiral HPLC chromatogram of racemic 3e

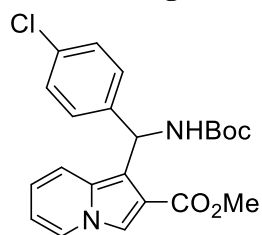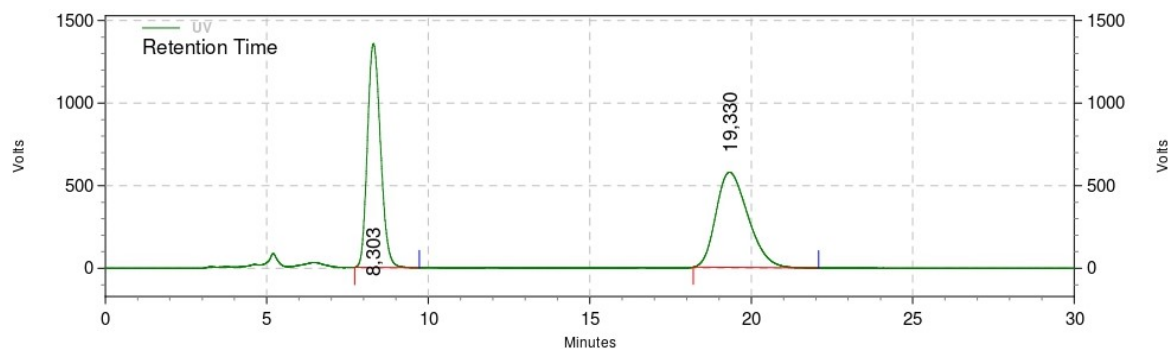

#### UV Results

| Retention Time | Area      | Area % | Height  | Height % |
|----------------|-----------|--------|---------|----------|
| 8,303          | 152989548 | 49,09  | 5418360 | 70,14    |
| 19,330         | 158644455 | 50,91  | 2306879 | 29,86    |
| Totals         | 311634003 | 100,00 | 7725239 | 100,00   |

### Chiral HPLC chromatogram of chiral 3e

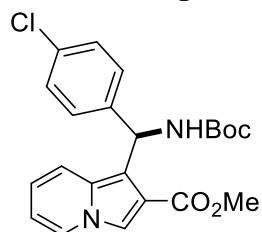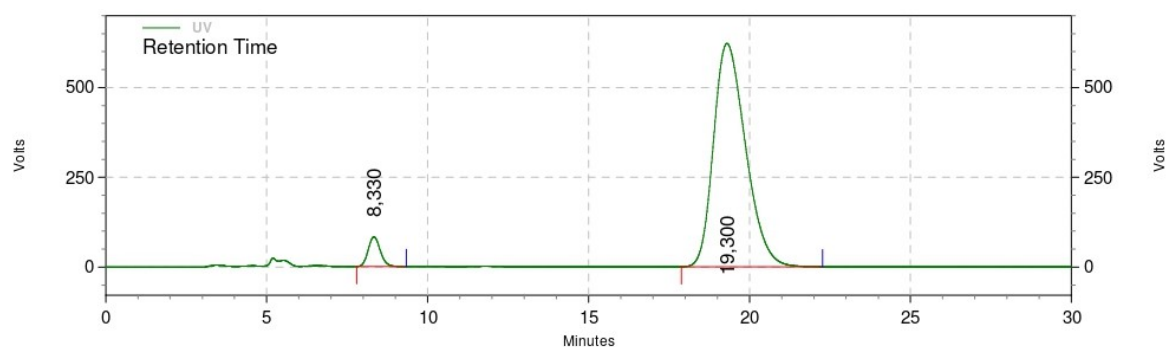

#### UV Results

| Retention Time | Area      | Area % | Height  | Height % |
|----------------|-----------|--------|---------|----------|
| 8,330          | 8662946   | 4,78   | 330986  | 11,74    |
| 19,300         | 172415471 | 95,22  | 2487606 | 88,26    |
| Totals         | 181078417 | 100,00 | 2818592 | 100,00   |

### Chiral HPLC chromatogram of racemic 4f

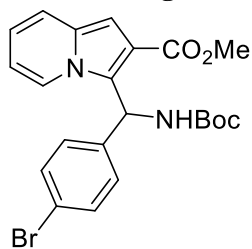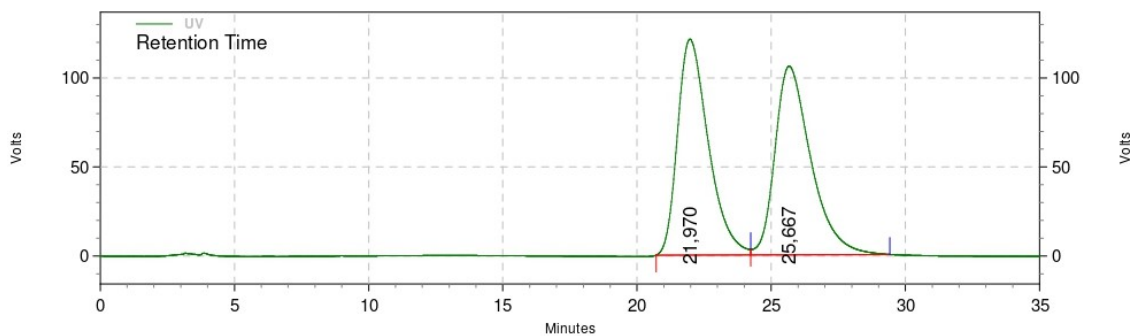

#### UV Results

| Retention Time | Area     | Area % | Height | Height % |
|----------------|----------|--------|--------|----------|
| 21,970         | 38775658 | 49,59  | 485056 | 53,37    |
| 25,667         | 39412010 | 50,41  | 423766 | 46,63    |
| Totals         | 78187668 | 100,00 | 908822 | 100,00   |

### Chiral HPLC chromatogram of chiral 4f

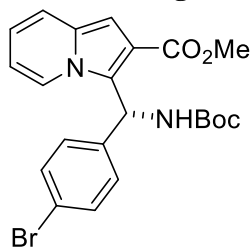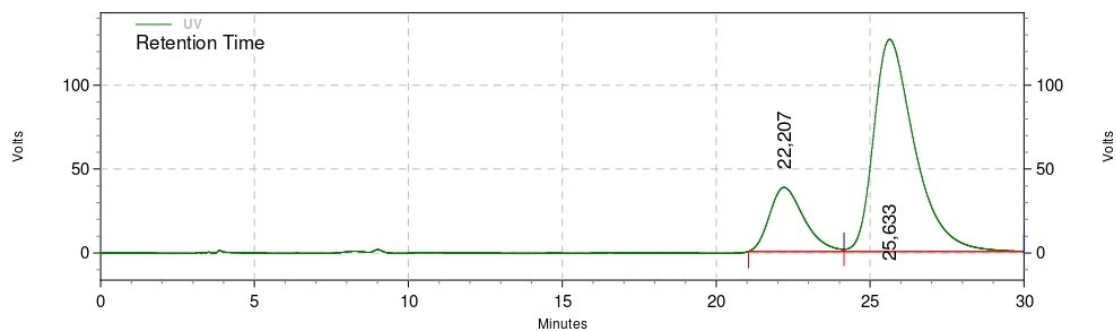

#### UV Results

| Retention Time | Area     | Area % | Height | Height % |
|----------------|----------|--------|--------|----------|
| 22,207         | 11829174 | 20,24  | 152605 | 23,17    |
| 25,633         | 46614556 | 79,76  | 505893 | 76,83    |
| Totals         | 58443730 | 100,00 | 658498 | 100,00   |

### Chiral HPLC chromatogram of racemic 3f

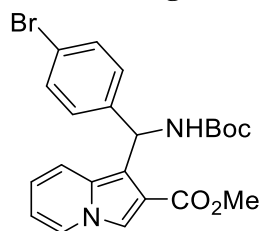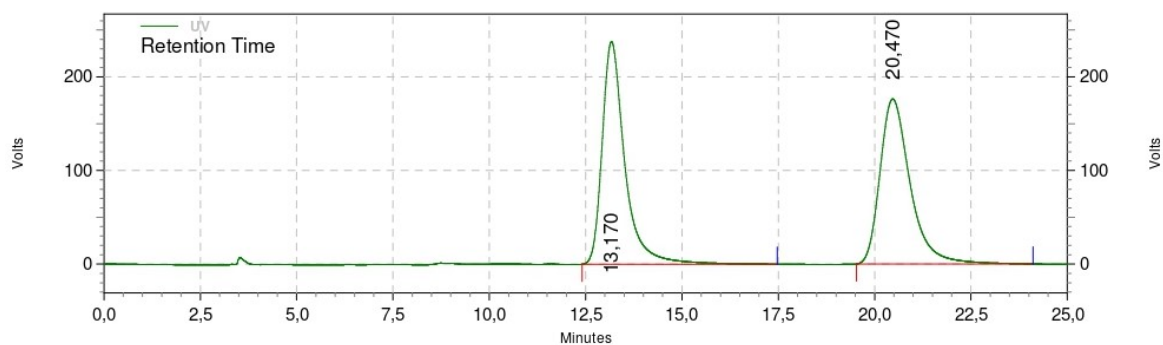

#### UV Results

| Retention Time | Area     | Area % | Height | Height % |
|----------------|----------|--------|--------|----------|
| 13,170         | 38948744 | 50,37  | 951174 | 57,42    |
| 20,470         | 38382878 | 49,63  | 705464 | 42,58    |

|        |          |        |         |        |
|--------|----------|--------|---------|--------|
| Totals | 77331622 | 100,00 | 1656638 | 100,00 |
|--------|----------|--------|---------|--------|

### Chiral HPLC chromatogram of chiral 3f

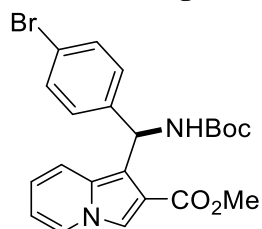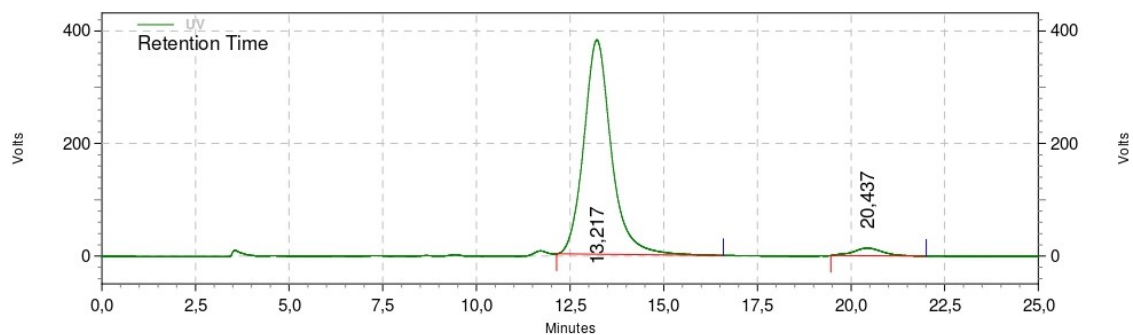

#### UV Results

| Retention Time | Area     | Area % | Height  | Height % |
|----------------|----------|--------|---------|----------|
| 13,217         | 77671067 | 96,31  | 1523542 | 96,55    |
| 20,437         | 2979225  | 3,69   | 54370   | 3,45     |

|        |          |        |         |        |
|--------|----------|--------|---------|--------|
| Totals | 80650292 | 100,00 | 1577912 | 100,00 |
|--------|----------|--------|---------|--------|

### Chiral HPLC chromatogram of racemic 4g

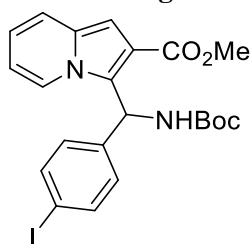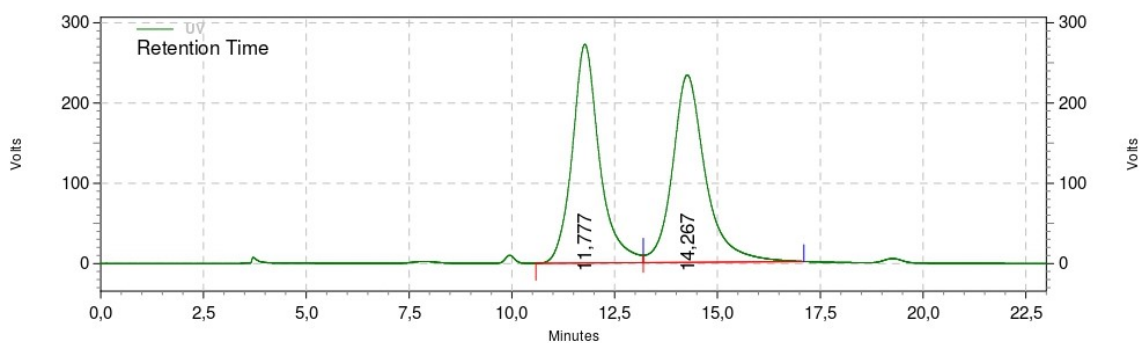

#### UV Results

| Retention Time | Area     | Area % | Height  | Height % |
|----------------|----------|--------|---------|----------|
| 11,777         | 50337746 | 49,18  | 1089135 | 53,83    |
| 14,267         | 52025693 | 50,82  | 934177  | 46,17    |

|        |           |        |         |        |
|--------|-----------|--------|---------|--------|
| Totals | 102363439 | 100,00 | 2023312 | 100,00 |
|--------|-----------|--------|---------|--------|

### Chiral HPLC chromatogram of chiral 4g

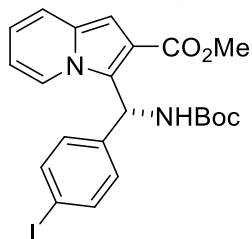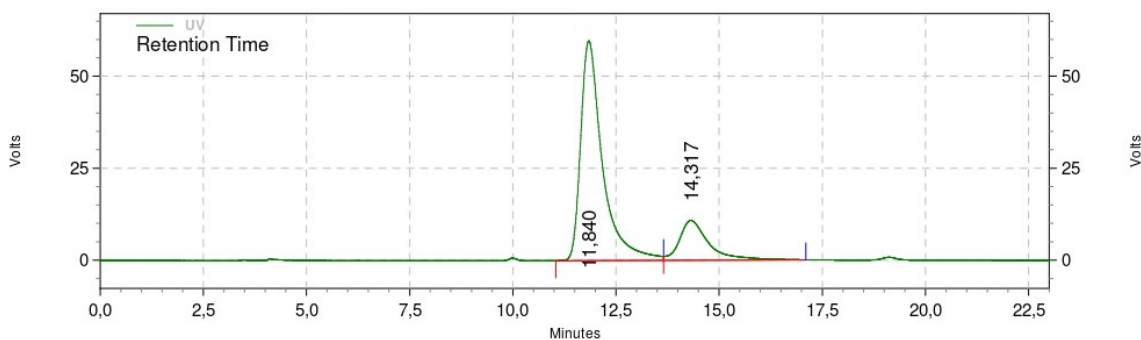

#### UV Results

| Retention Time | Area    | Area % | Height | Height % |
|----------------|---------|--------|--------|----------|
| 11,840         | 8750995 | 80,53  | 238750 | 84,65    |
| 14,317         | 2115123 | 19,47  | 43291  | 15,35    |

|        |          |        |        |        |
|--------|----------|--------|--------|--------|
| Totals | 10866118 | 100,00 | 282041 | 100,00 |
|--------|----------|--------|--------|--------|



### Chiral HPLC chromatogram of racemic 3g

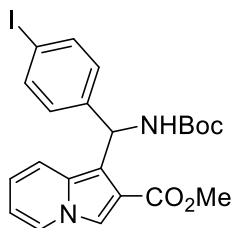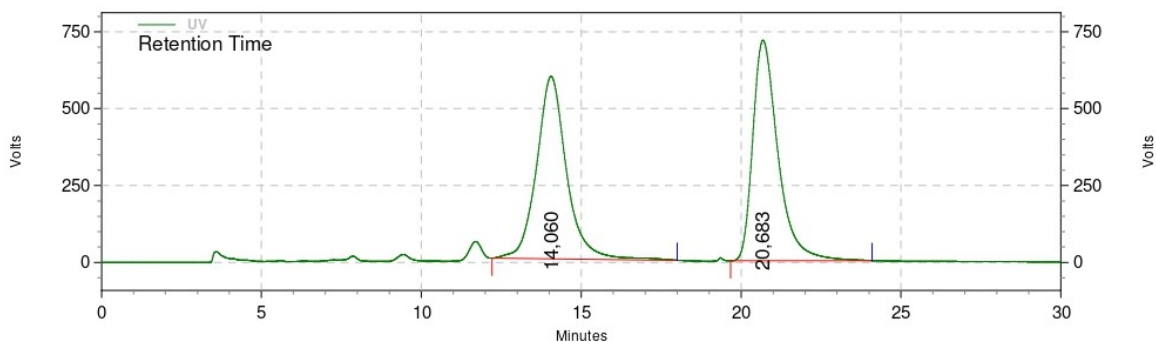

#### UV Results

| Retention Time | Area      | Area % | Height  | Height % |
|----------------|-----------|--------|---------|----------|
| 14,060         | 155133263 | 49,66  | 2372929 | 45,28    |
| 20,683         | 157285204 | 50,34  | 2867954 | 54,72    |

|        |           |        |         |        |
|--------|-----------|--------|---------|--------|
| Totals | 312418467 | 100,00 | 5240883 | 100,00 |
|--------|-----------|--------|---------|--------|

### Chiral HPLC chromatogram of chiral 3g

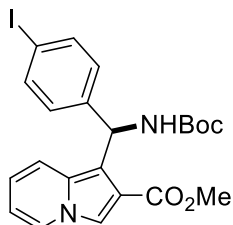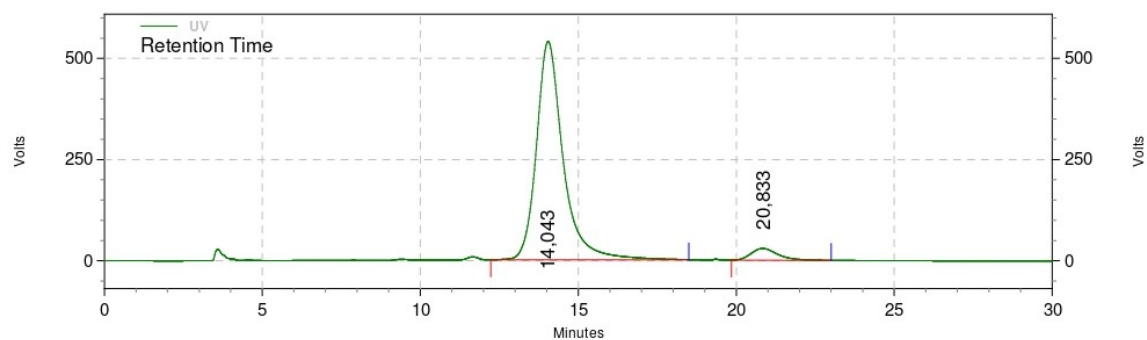

#### UV Results

| Retention Time | Area      | Area % | Height  | Height % |
|----------------|-----------|--------|---------|----------|
| 14,043         | 127151776 | 94,92  | 2158714 | 94,91    |
| 20,833         | 6805488   | 5,08   | 115758  | 5,09     |

|        |           |        |         |        |
|--------|-----------|--------|---------|--------|
| Totals | 133957264 | 100,00 | 2274472 | 100,00 |
|--------|-----------|--------|---------|--------|

### Chiral HPLC chromatogram of racemic 4h

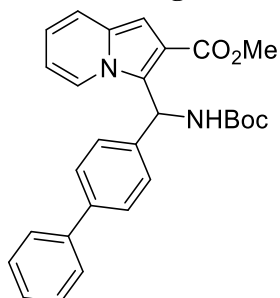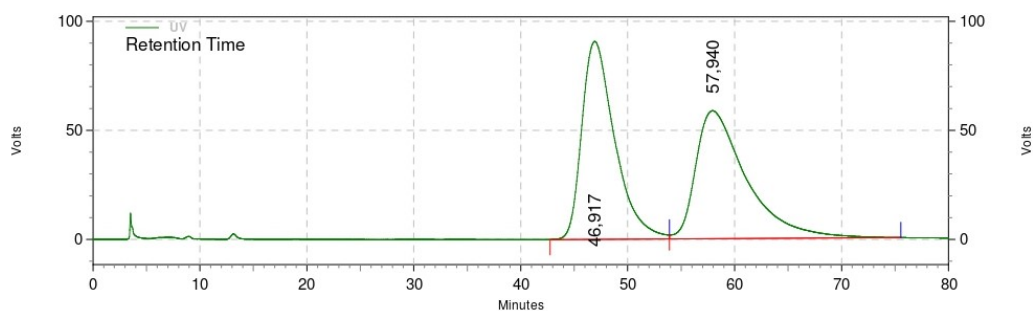

#### UV Results

| Retention Time | Area     | Area % | Height | Height % |
|----------------|----------|--------|--------|----------|
| 46,917         | 77672077 | 50,15  | 362630 | 60,72    |
| 57,940         | 77218864 | 49,85  | 234540 | 39,28    |

|        |           |        |        |        |
|--------|-----------|--------|--------|--------|
| Totals | 154890941 | 100,00 | 597170 | 100,00 |
|--------|-----------|--------|--------|--------|

### Chiral HPLC chromatogram of chiral 4h

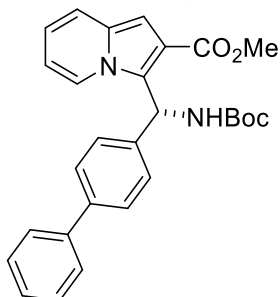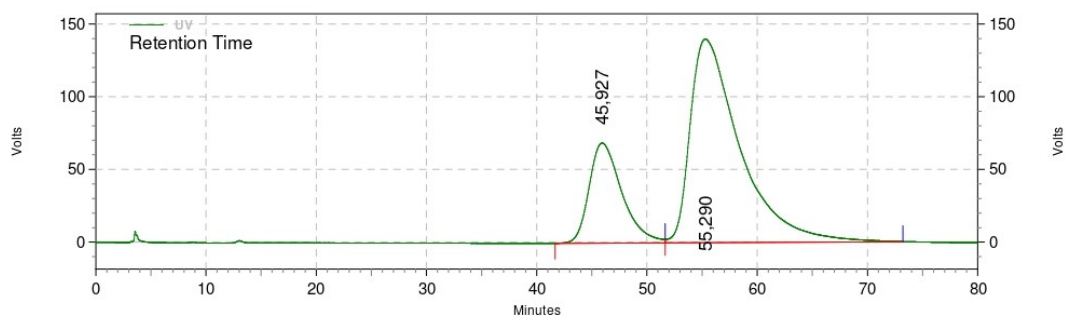

#### UV Results

| Retention Time | Area      | Area % | Height | Height % |
|----------------|-----------|--------|--------|----------|
| 45,927         | 56670974  | 24,42  | 275296 | 32,97    |
| 55,290         | 175401003 | 75,58  | 559723 | 67,03    |

|        |           |        |        |        |
|--------|-----------|--------|--------|--------|
| Totals | 232071977 | 100,00 | 835019 | 100,00 |
|--------|-----------|--------|--------|--------|

### Chiral HPLC chromatogram of racemic 3h

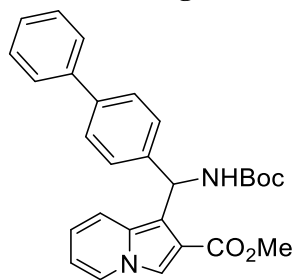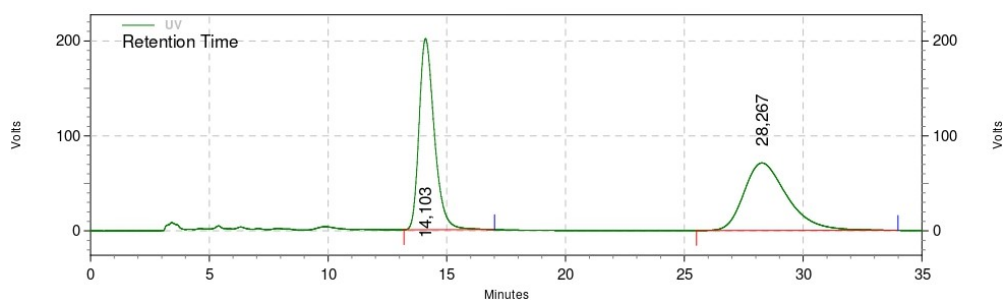

#### UV Results

| Retention Time | Area     | Area % | Height | Height % |
|----------------|----------|--------|--------|----------|
| 14,103         | 35979376 | 50,00  | 804698 | 73,89    |
| 28,267         | 35973592 | 50,00  | 284390 | 26,11    |

|        |          |        |         |        |
|--------|----------|--------|---------|--------|
| Totals | 71952968 | 100,00 | 1089088 | 100,00 |
|--------|----------|--------|---------|--------|

### Chiral HPLC chromatogram of chiral 3h

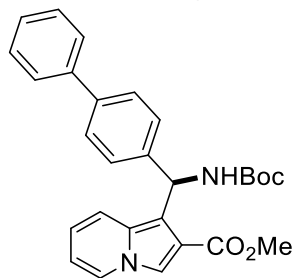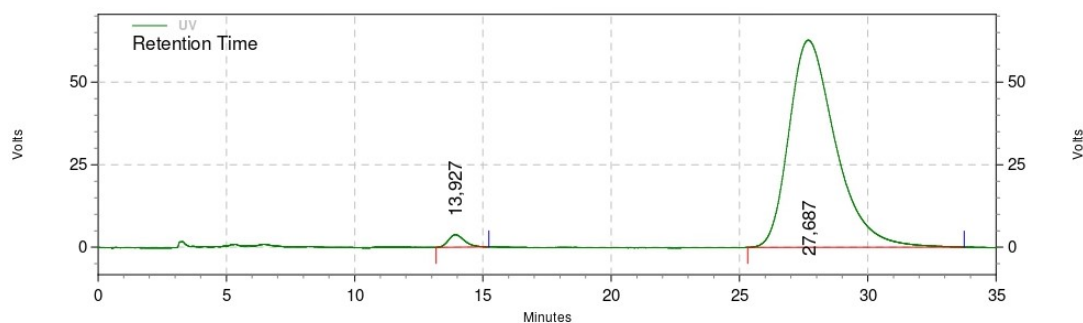

#### UV Results

| Retention Time | Area     | Area % | Height | Height % |
|----------------|----------|--------|--------|----------|
| 13,927         | 650696   | 2,02   | 15073  | 5,67     |
| 27,687         | 31638076 | 97,98  | 250826 | 94,33    |

|        |          |        |        |        |
|--------|----------|--------|--------|--------|
| Totals | 32288772 | 100,00 | 265899 | 100,00 |
|--------|----------|--------|--------|--------|

### Chiral HPLC chromatogram of racemic 4i

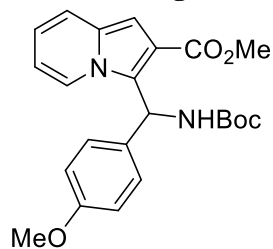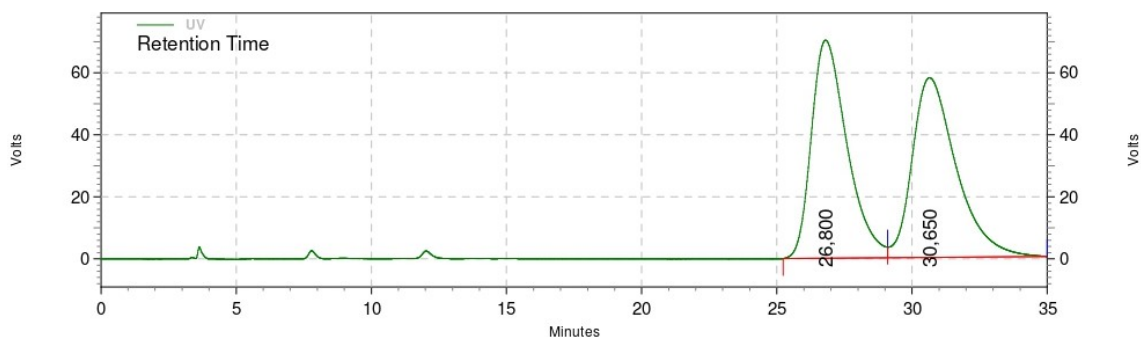

#### UV Results

| Retention Time | Area     | Area % | Height | Height % |
|----------------|----------|--------|--------|----------|
| 26,800         | 25787071 | 49,55  | 281163 | 54,82    |
| 30,650         | 26256268 | 50,45  | 231760 | 45,18    |

|        |          |        |        |        |
|--------|----------|--------|--------|--------|
| Totals | 52043339 | 100,00 | 512923 | 100,00 |
|--------|----------|--------|--------|--------|

### Chiral HPLC chromatogram of chiral 4i

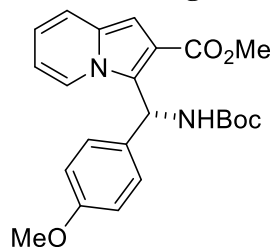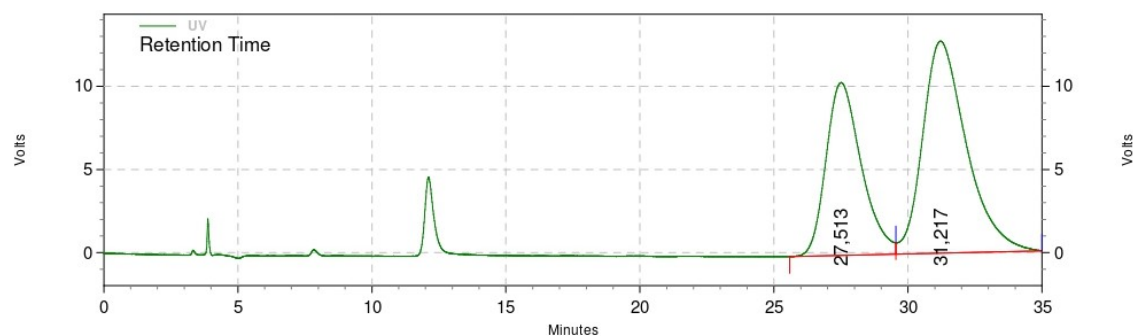

#### UV Results

| Retention Time | Area    | Area % | Height | Height % |
|----------------|---------|--------|--------|----------|
| 27,513         | 3805754 | 39,63  | 41566  | 44,91    |
| 31,217         | 5797016 | 60,37  | 50991  | 55,09    |

|        |         |        |       |        |
|--------|---------|--------|-------|--------|
| Totals | 9602770 | 100,00 | 92557 | 100,00 |
|--------|---------|--------|-------|--------|

### Chiral HPLC chromatogram of racemic 3i

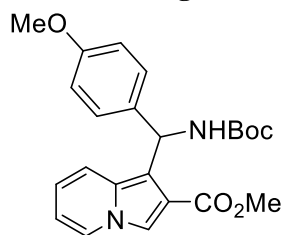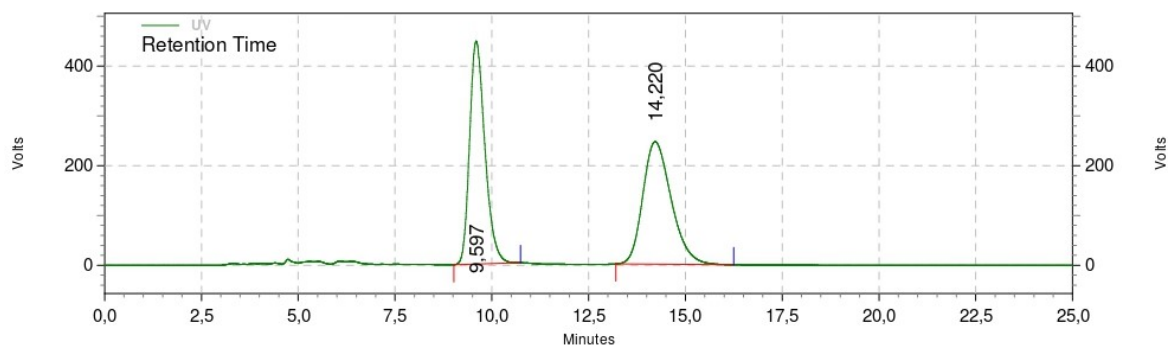

#### UV Results

| Retention Time | Area     | Area % | Height  | Height % |
|----------------|----------|--------|---------|----------|
| 9,597          | 49344175 | 49,50  | 1791299 | 64,53    |
| 14,220         | 50345015 | 50,50  | 984751  | 35,47    |

|        |          |        |         |        |
|--------|----------|--------|---------|--------|
| Totals | 99689190 | 100,00 | 2776050 | 100,00 |
|--------|----------|--------|---------|--------|

### Chiral HPLC chromatogram of chiral 3i

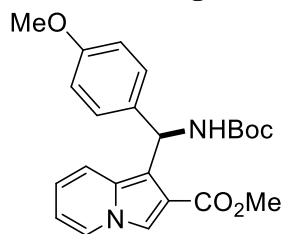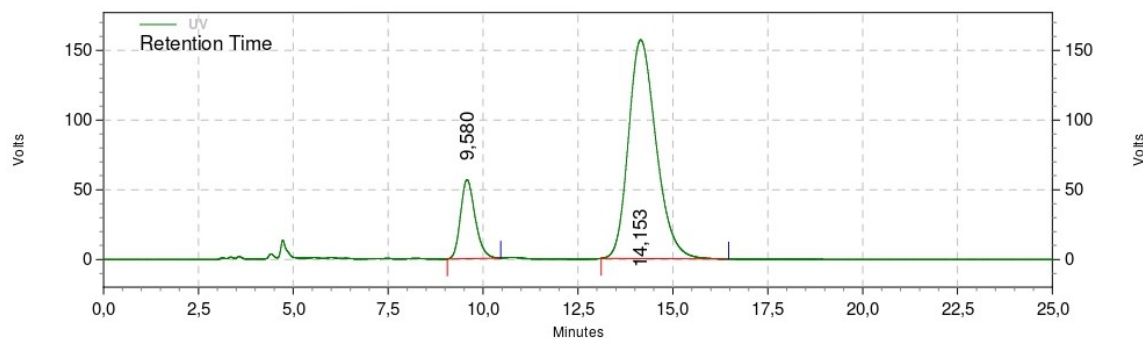

#### UV Results

| Retention Time | Area     | Area % | Height | Height % |
|----------------|----------|--------|--------|----------|
| 9,580          | 6057180  | 15,99  | 226492 | 26,53    |
| 14,153         | 31814308 | 84,01  | 627316 | 73,47    |

|        |          |        |        |        |
|--------|----------|--------|--------|--------|
| Totals | 37871488 | 100,00 | 853808 | 100,00 |
|--------|----------|--------|--------|--------|

### Chiral HPLC chromatogram of racemic 4j

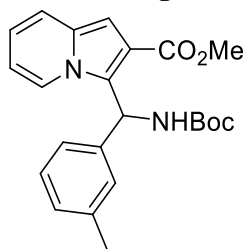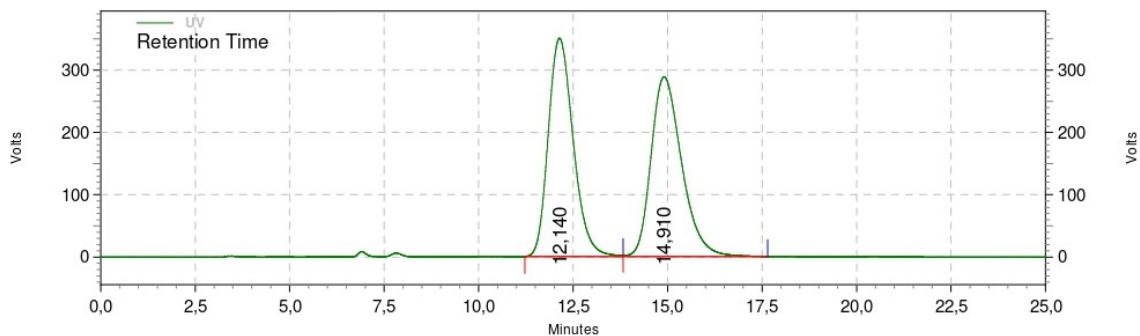

#### UV Results

| Retention Time | Area     | Area % | Height  | Height % |
|----------------|----------|--------|---------|----------|
| 12,140         | 64379837 | 49,81  | 1400738 | 54,85    |
| 14,910         | 64881108 | 50,19  | 1153095 | 45,15    |

|        |           |        |         |        |
|--------|-----------|--------|---------|--------|
| Totals | 129260945 | 100,00 | 2553833 | 100,00 |
|--------|-----------|--------|---------|--------|

### Chiral HPLC chromatogram of chiral 4j

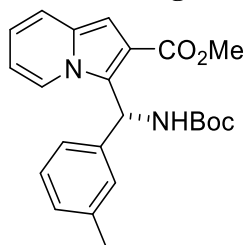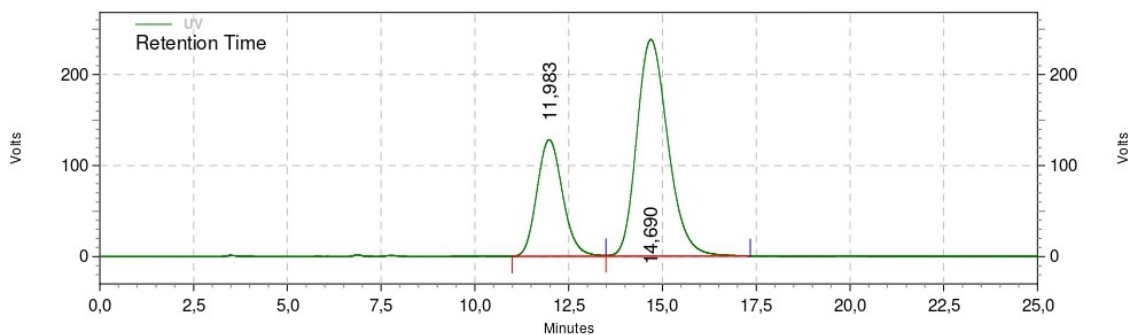

#### UV Results

| Retention Time | Area     | Area % | Height | Height % |
|----------------|----------|--------|--------|----------|
| 11,983         | 24378989 | 30,74  | 512721 | 35,00    |
| 14,690         | 54918891 | 69,26  | 952325 | 65,00    |

|        |          |        |         |        |
|--------|----------|--------|---------|--------|
| Totals | 79297880 | 100,00 | 1465046 | 100,00 |
|--------|----------|--------|---------|--------|

### Chiral HPLC chromatogram of racemic 3j

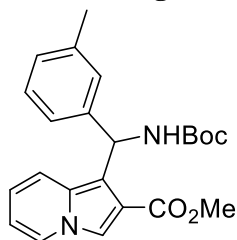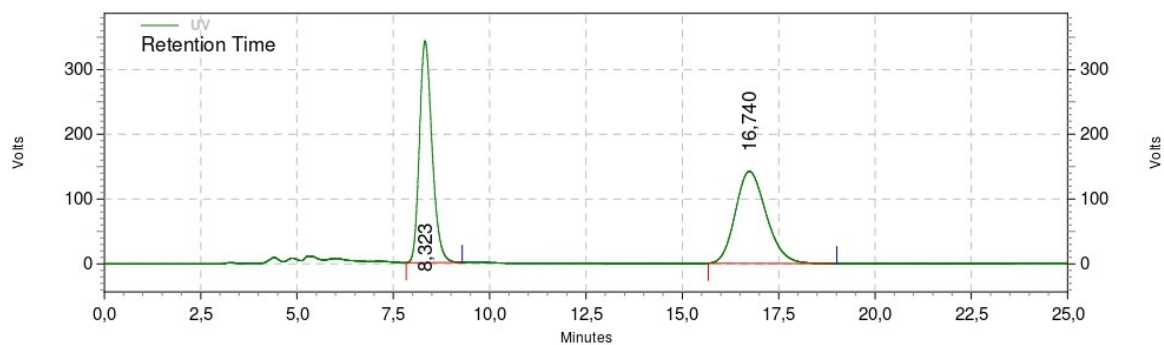

#### UV Results

| Retention Time | Area     | Area % | Height  | Height % |
|----------------|----------|--------|---------|----------|
| 8,323          | 31167327 | 49,70  | 1368776 | 70,67    |
| 16,740         | 31549426 | 50,30  | 568026  | 29,33    |

|        |          |        |         |        |
|--------|----------|--------|---------|--------|
| Totals | 62716753 | 100,00 | 1936802 | 100,00 |
|--------|----------|--------|---------|--------|

### Chiral HPLC chromatogram of chiral 3j

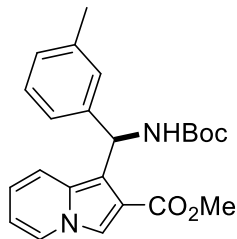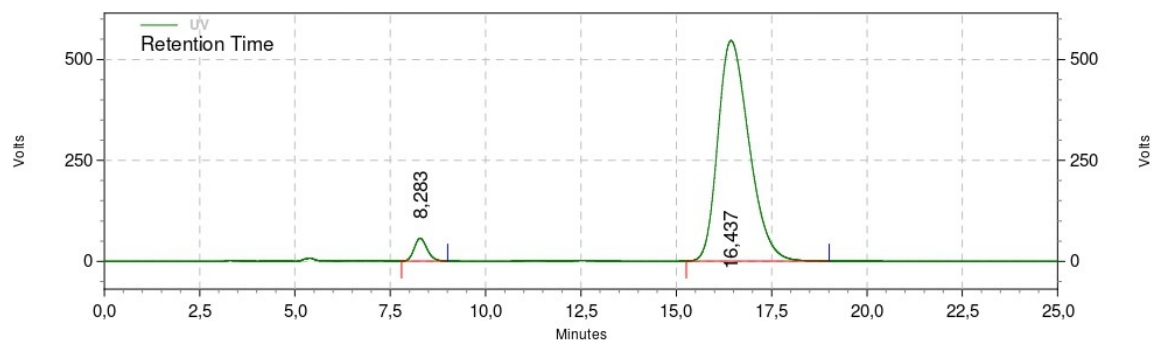

#### UV Results

| Retention Time | Area      | Area % | Height  | Height % |
|----------------|-----------|--------|---------|----------|
| 8,283          | 5356214   | 4,13   | 227205  | 9,42     |
| 16,437         | 124246528 | 95,87  | 2184483 | 90,58    |

|        |           |        |         |        |
|--------|-----------|--------|---------|--------|
| Totals | 129602742 | 100,00 | 2411688 | 100,00 |
|--------|-----------|--------|---------|--------|

### Chiral HPLC chromatogram of racemic 4k

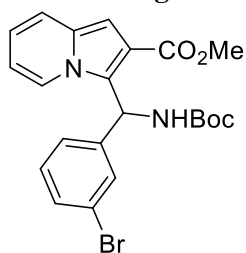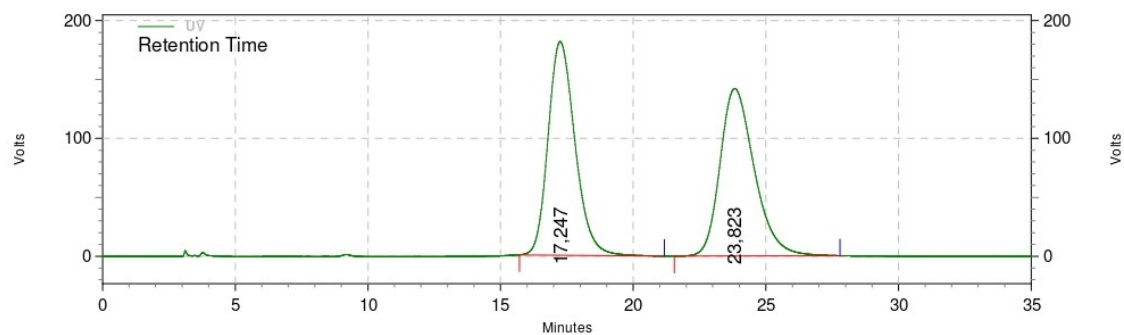

#### UV Results

| Retention Time | Area     | Area % | Height | Height % |
|----------------|----------|--------|--------|----------|
| 17,247         | 51205008 | 50,05  | 725274 | 56,04    |
| 23,823         | 51099737 | 49,95  | 568924 | 43,96    |

|        |           |        |         |        |
|--------|-----------|--------|---------|--------|
| Totals | 102304745 | 100,00 | 1294198 | 100,00 |
|--------|-----------|--------|---------|--------|

### Chiral HPLC chromatogram of chiral 4k

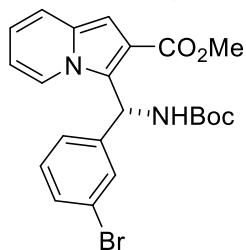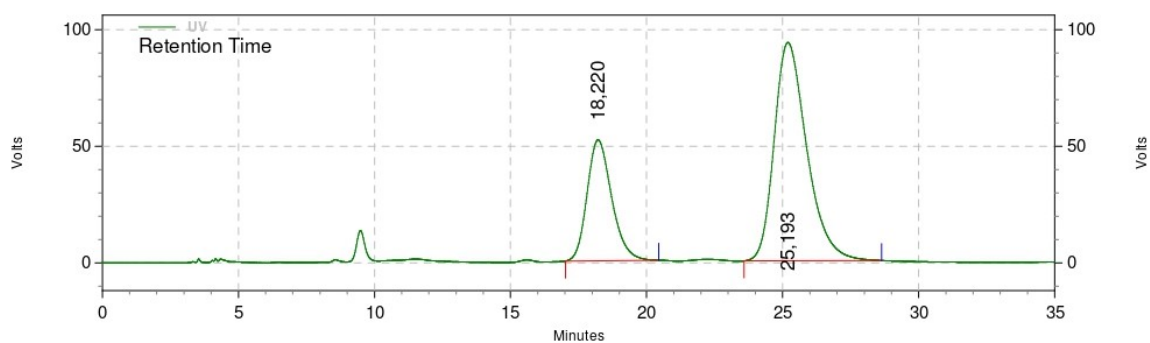

#### UV Results

| Retention Time | Area     | Area % | Height | Height % |
|----------------|----------|--------|--------|----------|
| 18,220         | 13034520 | 29,46  | 207559 | 35,65    |
| 25,193         | 31213349 | 70,54  | 374622 | 64,35    |

|        |          |        |        |        |
|--------|----------|--------|--------|--------|
| Totals | 44247869 | 100,00 | 582181 | 100,00 |
|--------|----------|--------|--------|--------|



### Chiral HPLC chromatogram of racemic 3k

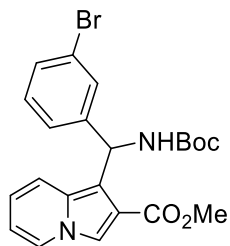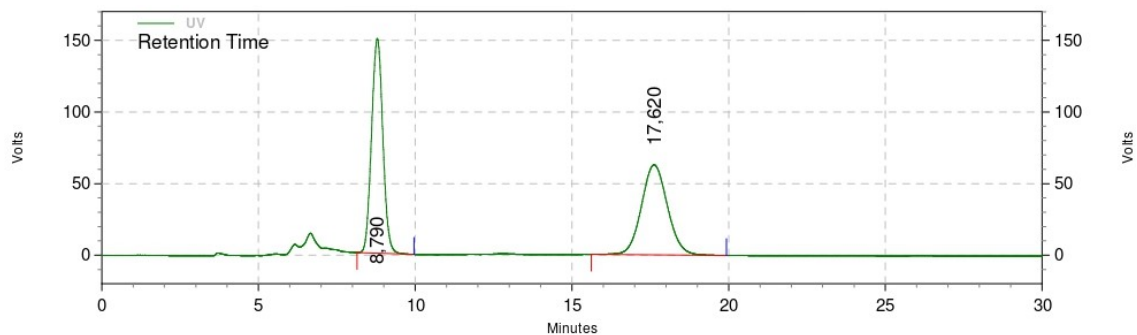

#### UV Results

| Retention Time | Area     | Area % | Height | Height % |
|----------------|----------|--------|--------|----------|
| 8,790          | 15038327 | 50,92  | 599545 | 70,44    |
| 17,620         | 14494176 | 49,08  | 251572 | 29,56    |
| Totals         | 29532503 | 100,00 | 851117 | 100,00   |

### Chiral HPLC chromatogram of chiral 3k

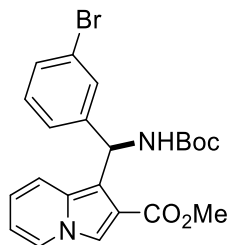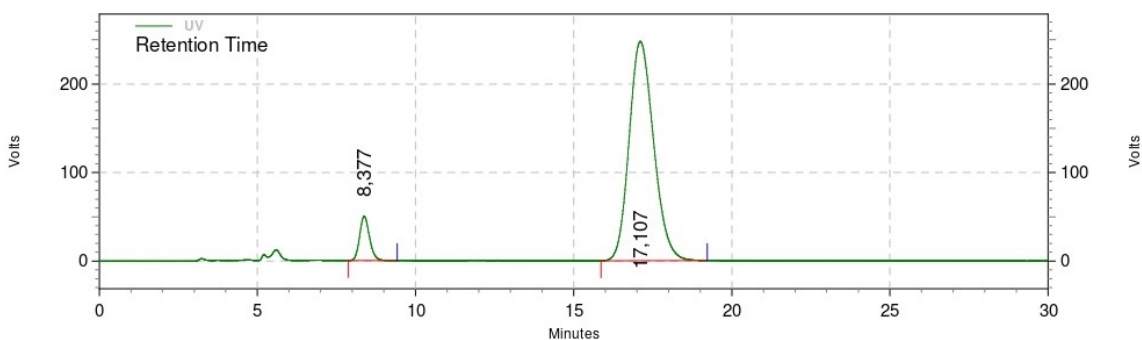

#### UV Results

| Retention Time | Area     | Area % | Height  | Height % |
|----------------|----------|--------|---------|----------|
| 8,377          | 4381626  | 7,57   | 200835  | 16,85    |
| 17,107         | 53493565 | 92,43  | 990925  | 83,15    |
| Totals         | 57875191 | 100,00 | 1191760 | 100,00   |

### Chiral HPLC chromatogram of racemic 4l

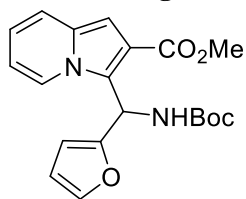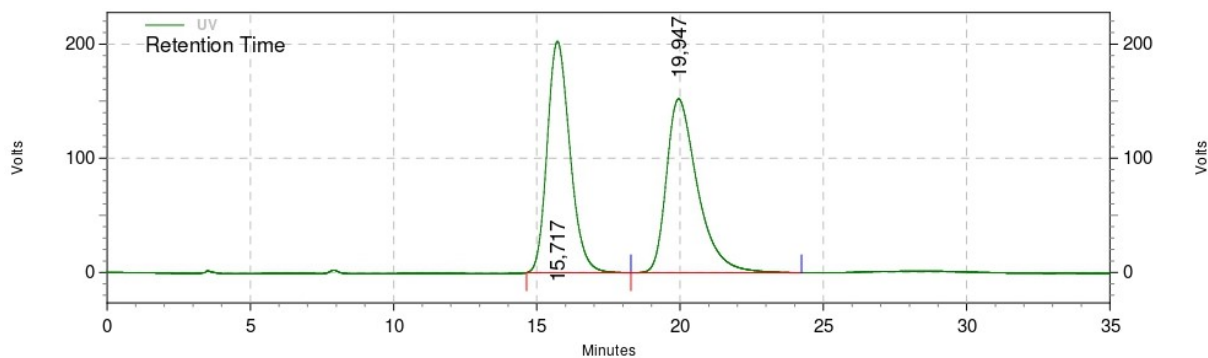

#### UV Results

| Retention Time | Area     | Area % | Height | Height % |
|----------------|----------|--------|--------|----------|
| 15,717         | 44674800 | 49,31  | 810544 | 57,08    |
| 19,947         | 45932149 | 50,69  | 609449 | 42,92    |

|        |          |        |         |        |
|--------|----------|--------|---------|--------|
| Totals | 90606949 | 100,00 | 1419993 | 100,00 |
|--------|----------|--------|---------|--------|

### Chiral HPLC chromatogram of chiral 4l

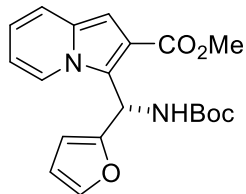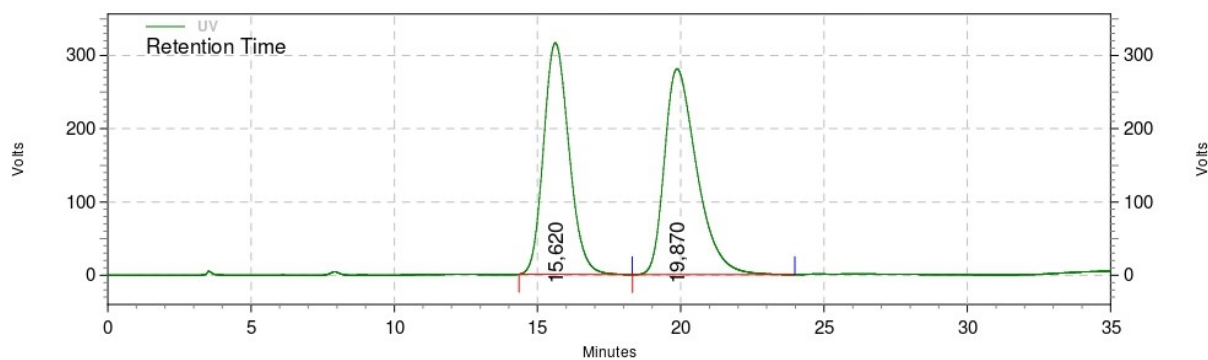

#### UV Results

| Retention Time | Area     | Area % | Height  | Height % |
|----------------|----------|--------|---------|----------|
| 15,620         | 78217572 | 47,00  | 1264228 | 52,94    |
| 19,870         | 88185589 | 53,00  | 1123858 | 47,06    |

|        |           |        |         |        |
|--------|-----------|--------|---------|--------|
| Totals | 166403161 | 100,00 | 2388086 | 100,00 |
|--------|-----------|--------|---------|--------|

### Chiral HPLC chromatogram of racemic 3l

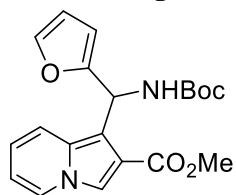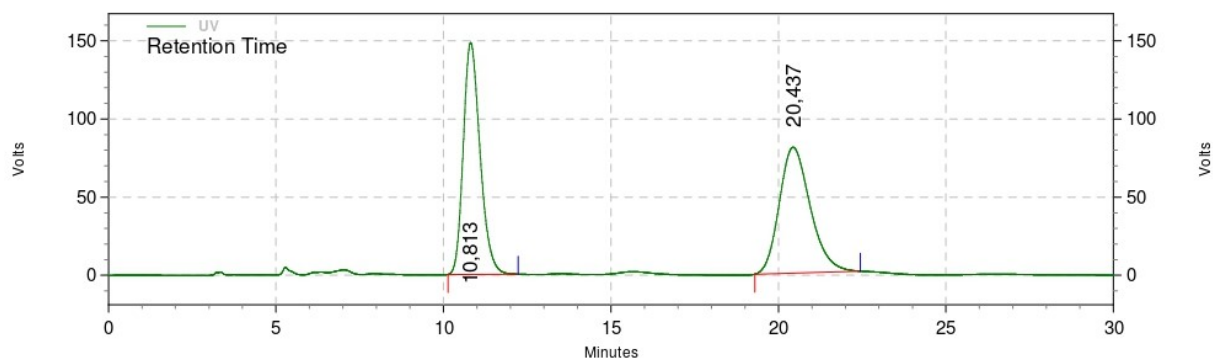

#### UV Results

| Retention Time | Area     | Area % | Height | Height % |
|----------------|----------|--------|--------|----------|
| 10,813         | 20635314 | 49,98  | 592887 | 64,80    |
| 20,437         | 20648416 | 50,02  | 322027 | 35,20    |

|        |          |        |        |        |
|--------|----------|--------|--------|--------|
| Totals | 41283730 | 100,00 | 914914 | 100,00 |
|--------|----------|--------|--------|--------|

### Chiral HPLC chromatogram of chiral 3l

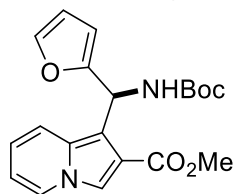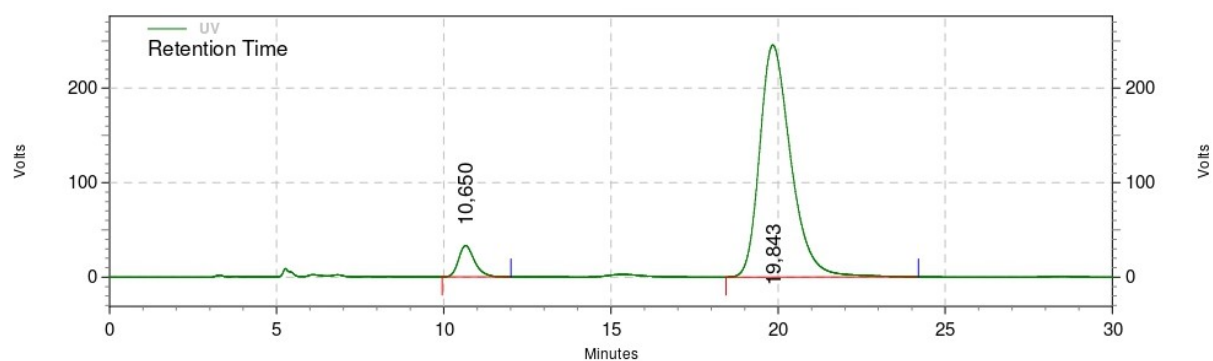

#### UV Results

| Retention Time | Area     | Area % | Height | Height % |
|----------------|----------|--------|--------|----------|
| 10,650         | 4433978  | 6,51   | 132711 | 11,90    |
| 19,843         | 63643391 | 93,49  | 982265 | 88,10    |

|        |          |        |         |        |
|--------|----------|--------|---------|--------|
| Totals | 68077369 | 100,00 | 1114976 | 100,00 |
|--------|----------|--------|---------|--------|

### Chiral HPLC chromatogram of racemic 4m

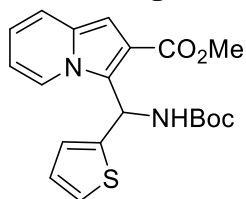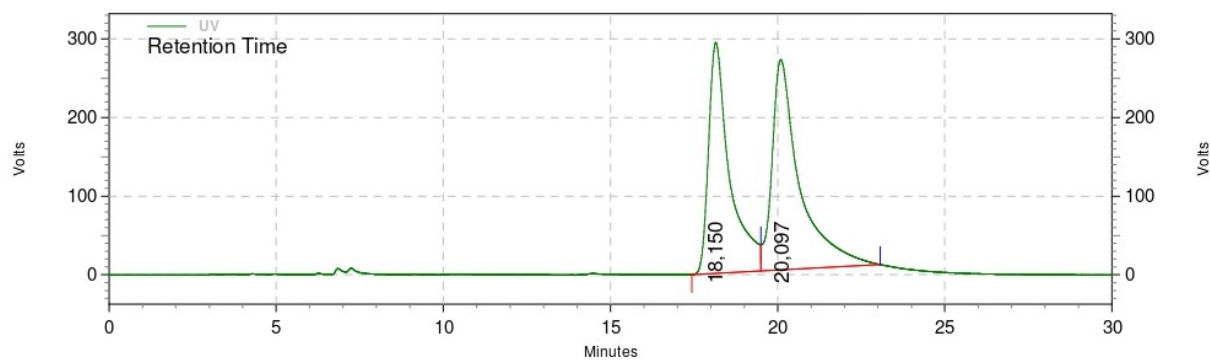

#### UV Results

| Retention Time | Area     | Area % | Height  | Height % |
|----------------|----------|--------|---------|----------|
| 18,150         | 51417152 | 45,60  | 1174076 | 52,35    |
| 20,097         | 61331138 | 54,40  | 1068865 | 47,65    |

|        |           |        |         |        |
|--------|-----------|--------|---------|--------|
| Totals | 112748290 | 100,00 | 2242941 | 100,00 |
|--------|-----------|--------|---------|--------|

### Chiral HPLC chromatogram of chiral 4m

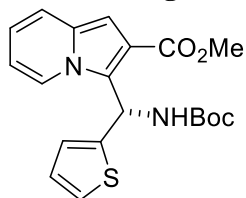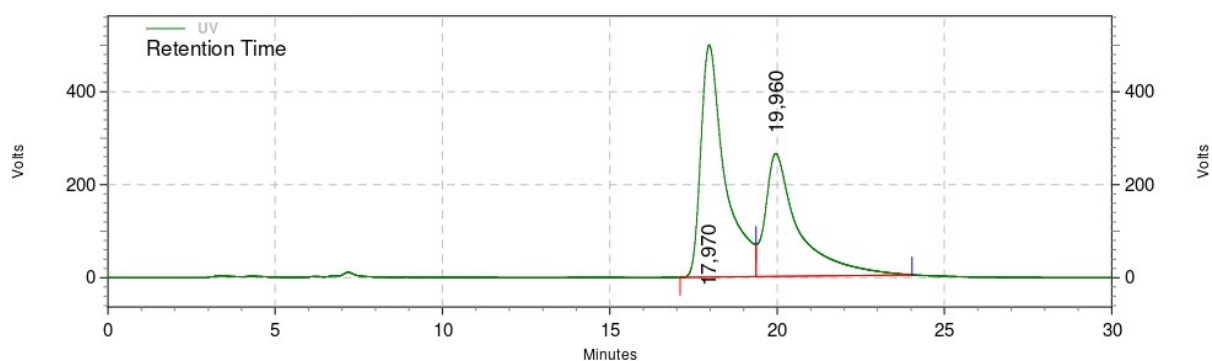

#### UV Results

| Retention Time | Area     | Area % | Height  | Height % |
|----------------|----------|--------|---------|----------|
| 17,970         | 99854384 | 57,71  | 1997846 | 65,40    |
| 19,960         | 73180870 | 42,29  | 1056916 | 34,60    |

|        |           |        |         |        |
|--------|-----------|--------|---------|--------|
| Totals | 173035254 | 100,00 | 3054762 | 100,00 |
|--------|-----------|--------|---------|--------|

### Chiral HPLC chromatogram of racemic 3m

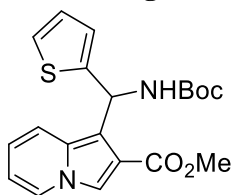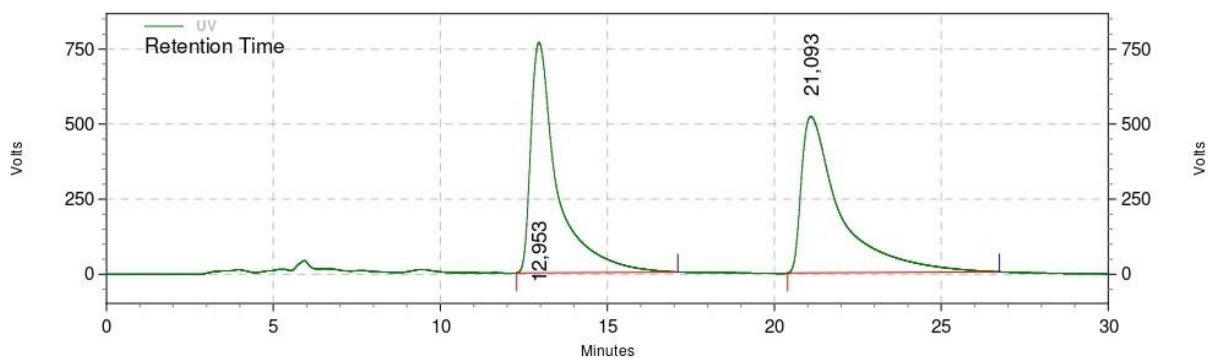

#### UV Results

| Retention Time | Area      | Area % | Height  | Height % |
|----------------|-----------|--------|---------|----------|
| 12,953         | 169043090 | 50,00  | 3071260 | 59,57    |
| 21,093         | 169032737 | 50,00  | 2084610 | 40,43    |

|        |           |        |         |        |
|--------|-----------|--------|---------|--------|
| Totals | 338075827 | 100,00 | 5155870 | 100,00 |
|--------|-----------|--------|---------|--------|

### Chiral HPLC chromatogram of chiral 3m

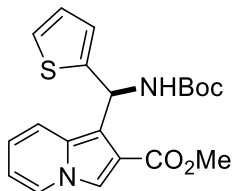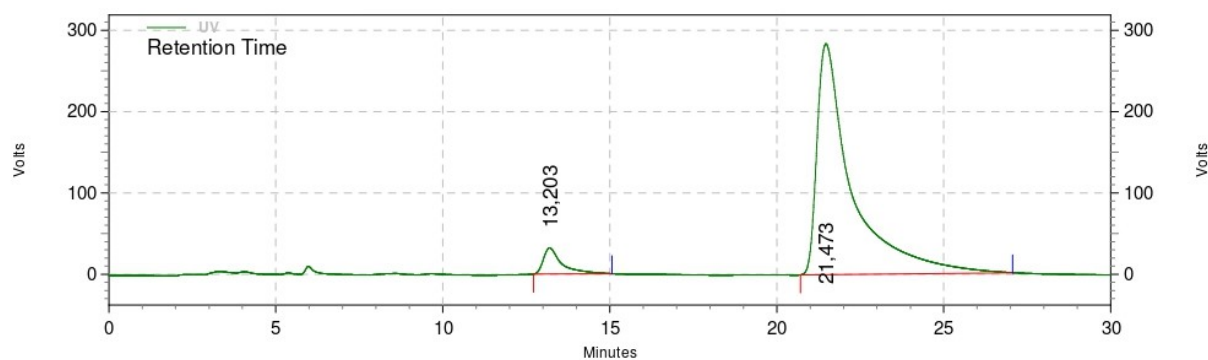

#### UV Results

| Retention Time | Area     | Area % | Height  | Height % |
|----------------|----------|--------|---------|----------|
| 13,203         | 4923712  | 5,67   | 128563  | 10,17    |
| 21,473         | 81950492 | 94,33  | 1135042 | 89,83    |

|        |          |        |         |        |
|--------|----------|--------|---------|--------|
| Totals | 86874204 | 100,00 | 1263605 | 100,00 |
|--------|----------|--------|---------|--------|

### Chiral HPLC chromatogram of racemic 4n

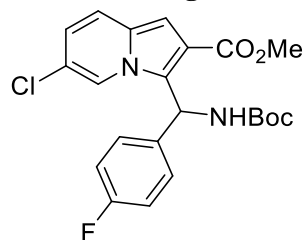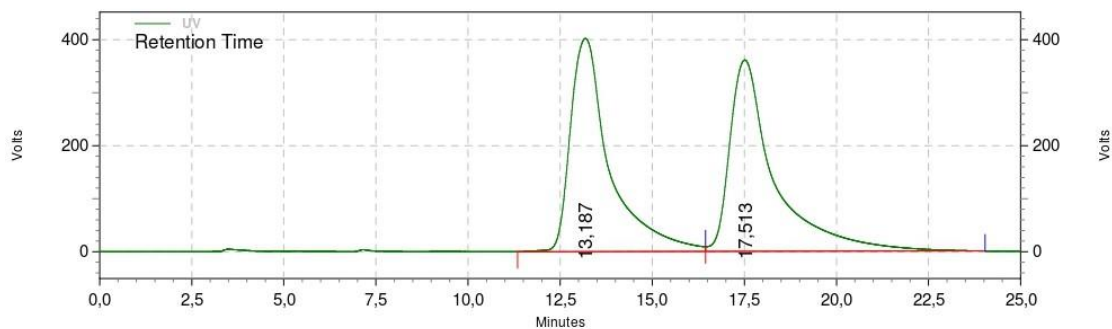

#### UV Results

| Retention Time | Area      | Area % | Height  | Height % |
|----------------|-----------|--------|---------|----------|
| 13,187         | 118528905 | 49,49  | 1607833 | 52,68    |
| 17,513         | 120983617 | 50,51  | 1444327 | 47,32    |

|        |           |        |         |        |
|--------|-----------|--------|---------|--------|
| Totals | 239512522 | 100,00 | 3052160 | 100,00 |
|--------|-----------|--------|---------|--------|

### Chiral HPLC chromatogram of chiral 4n

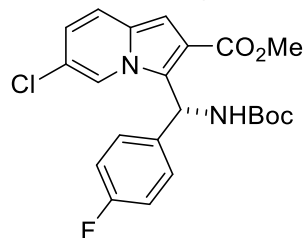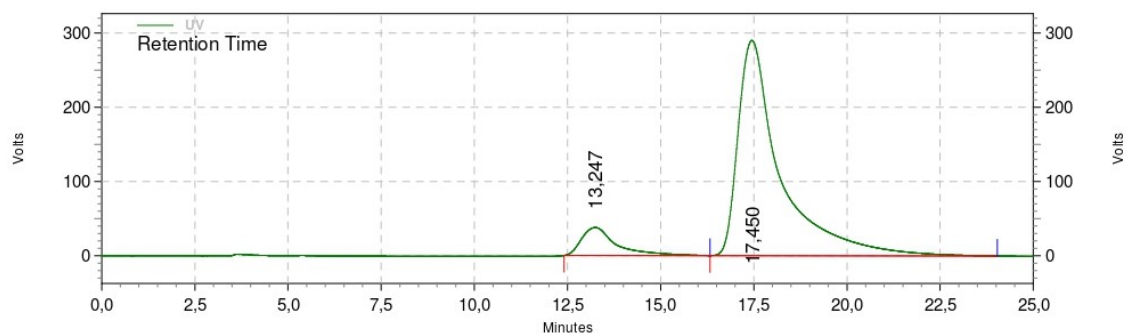

#### UV Results

| Retention Time | Area     | Area % | Height  | Height % |
|----------------|----------|--------|---------|----------|
| 13,247         | 9850667  | 9,70   | 151069  | 11,52    |
| 17,450         | 91659546 | 90,30  | 1160618 | 88,48    |

|        |           |        |         |        |
|--------|-----------|--------|---------|--------|
| Totals | 101510213 | 100,00 | 1311687 | 100,00 |
|--------|-----------|--------|---------|--------|

### Chiral HPLC chromatogram of racemic 3n

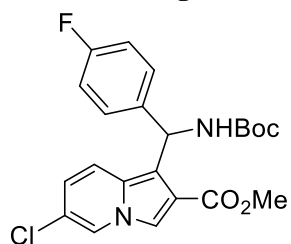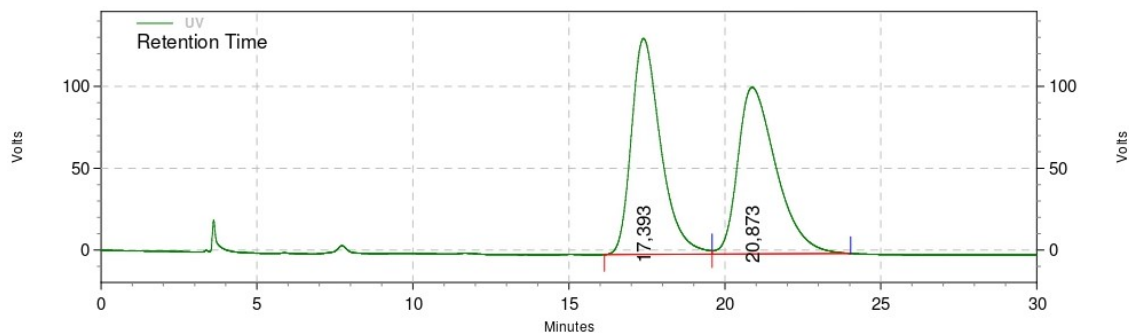

#### UV Results

| Retention Time | Area     | Area % | Height | Height % |
|----------------|----------|--------|--------|----------|
| 17,393         | 34623027 | 49,86  | 528243 | 56,45    |
| 20,873         | 34815377 | 50,14  | 407582 | 43,55    |
| Totals         | 69438404 | 100,00 | 935825 | 100,00   |

### Chiral HPLC chromatogram of chiral 3n

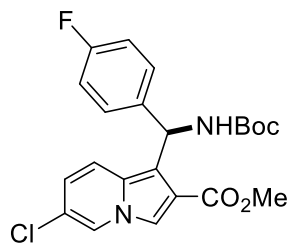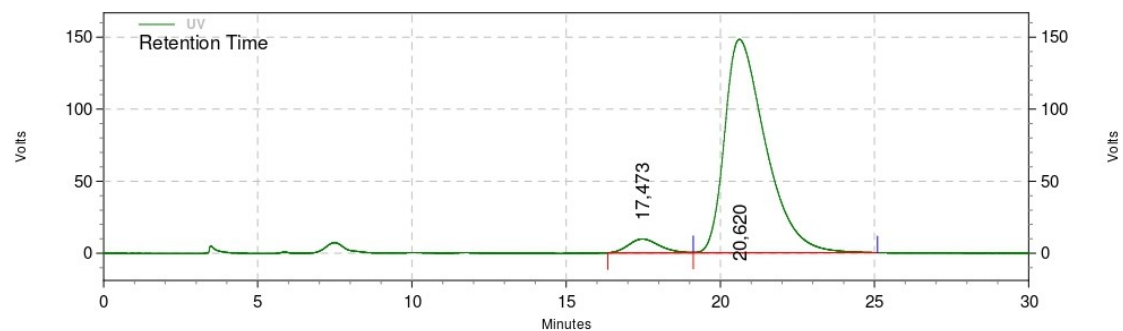

#### UV Results

| Retention Time | Area     | Area % | Height | Height % |
|----------------|----------|--------|--------|----------|
| 17,473         | 2645841  | 4,62   | 38205  | 6,06     |
| 20,620         | 54562601 | 95,38  | 591872 | 93,94    |
| Totals         | 57208442 | 100,00 | 630077 | 100,00   |

### Chiral HPLC chromatogram of racemic 4o

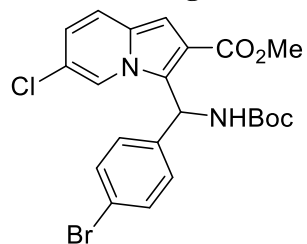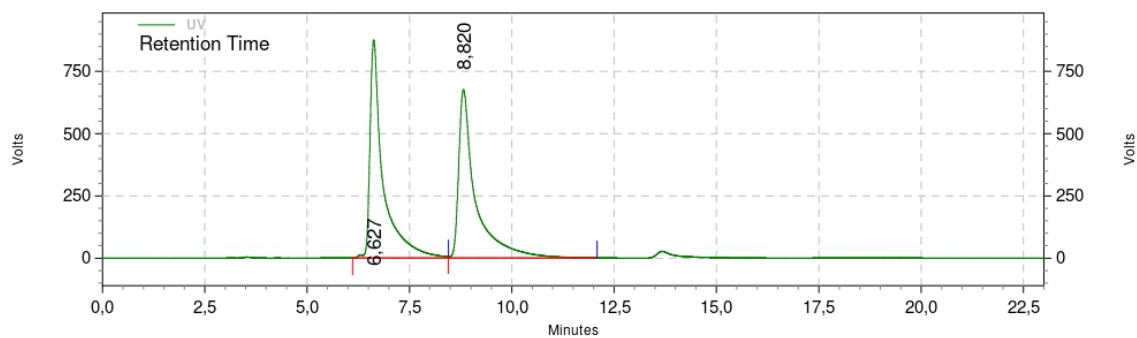

#### UV Results

| Retention Time | Area      | Area % | Height  | Height % |
|----------------|-----------|--------|---------|----------|
| 6,627          | 77790690  | 50,33  | 3501343 | 56,42    |
| 8,820          | 76758625  | 49,67  | 2704899 | 43,58    |
| Totals         | 154549315 | 100,00 | 6206242 | 100,00   |

### Chiral HPLC chromatogram of chiral 4o

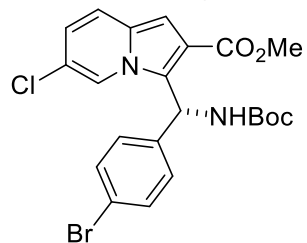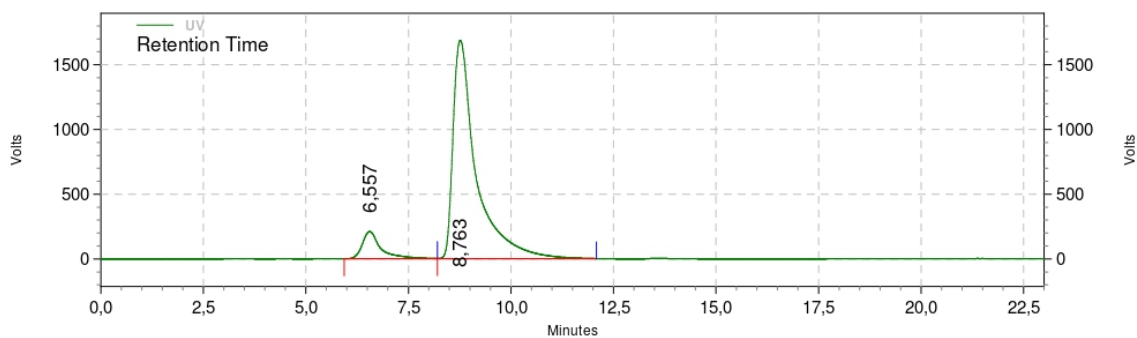

#### UV Results

| Retention Time | Area      | Area % | Height  | Height % |
|----------------|-----------|--------|---------|----------|
| 6,557          | 26577923  | 9,12   | 840443  | 11,08    |
| 8,763          | 264758608 | 90,88  | 6744832 | 88,92    |
| Totals         | 291336531 | 100,00 | 7585275 | 100,00   |



### Chiral HPLC chromatogram of racemic 3o

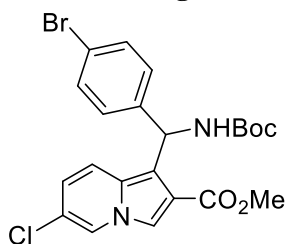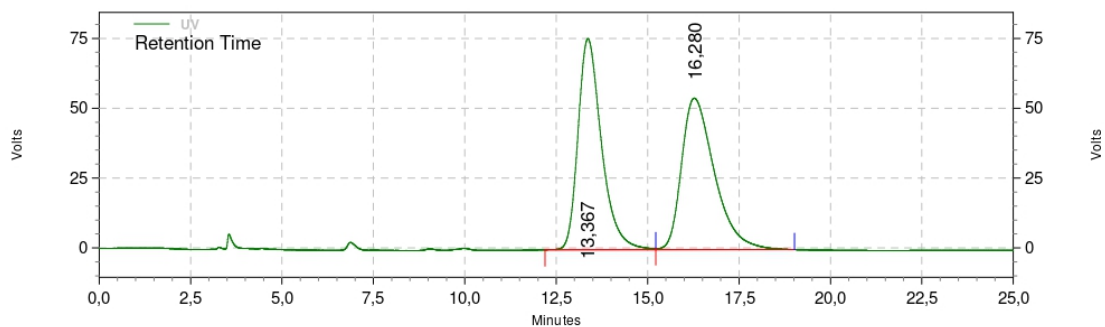

#### UV Results

| Retention Time | Area     | Area % | Height | Height % |
|----------------|----------|--------|--------|----------|
| 13,367         | 13521189 | 49,88  | 302187 | 58,20    |
| 16,280         | 13587891 | 50,12  | 217014 | 41,80    |

|        |          |        |        |        |
|--------|----------|--------|--------|--------|
| Totals | 27109080 | 100,00 | 519201 | 100,00 |
|--------|----------|--------|--------|--------|

### Chiral HPLC chromatogram of chiral 3o

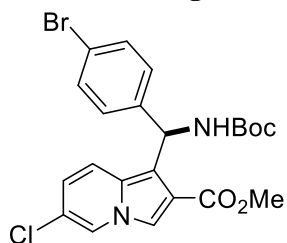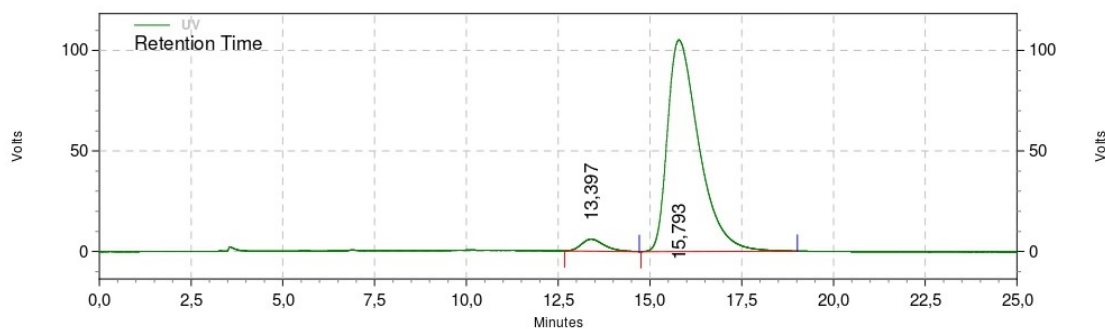

#### UV Results

| Retention Time | Area     | Area % | Height | Height % |
|----------------|----------|--------|--------|----------|
| 13,397         | 1024337  | 3,93   | 23782  | 5,35     |
| 15,793         | 25065047 | 96,07  | 420686 | 94,65    |

|        |          |        |        |        |
|--------|----------|--------|--------|--------|
| Totals | 26089384 | 100,00 | 444468 | 100,00 |
|--------|----------|--------|--------|--------|

### Chiral HPLC chromatogram of racemic 4p

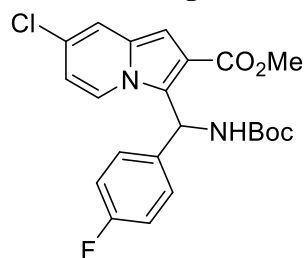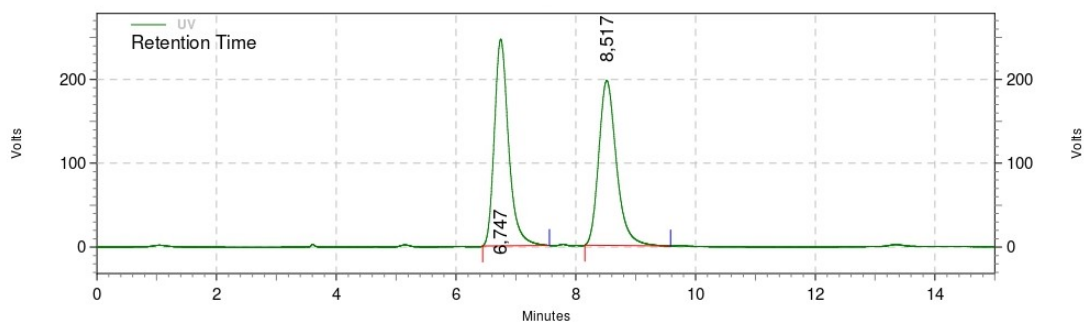

#### UV Results

| Retention Time | Area     | Area % | Height | Height % |
|----------------|----------|--------|--------|----------|
| 6,747          | 16285939 | 50,23  | 985252 | 55,61    |
| 8,517          | 16133609 | 49,77  | 786339 | 44,39    |

|        |          |        |         |        |
|--------|----------|--------|---------|--------|
| Totals | 32419548 | 100,00 | 1771591 | 100,00 |
|--------|----------|--------|---------|--------|

### Chiral HPLC chromatogram of chiral 4p

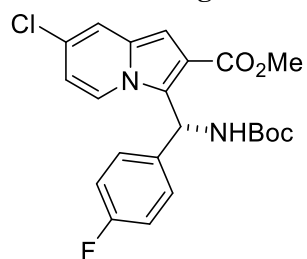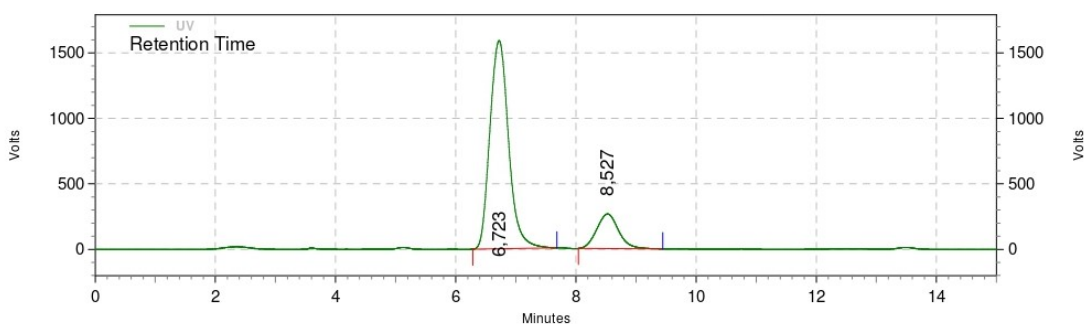

#### UV Results

| Retention Time | Area      | Area % | Height  | Height % |
|----------------|-----------|--------|---------|----------|
| 6,723          | 137449272 | 83,77  | 6355920 | 85,74    |
| 8,527          | 26623279  | 16,23  | 1057190 | 14,26    |

|        |           |        |         |        |
|--------|-----------|--------|---------|--------|
| Totals | 164072551 | 100,00 | 7413110 | 100,00 |
|--------|-----------|--------|---------|--------|

### Chiral HPLC chromatogram of racemic 3p

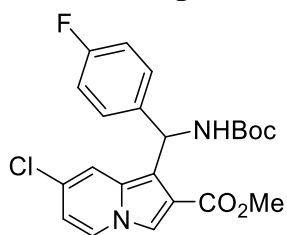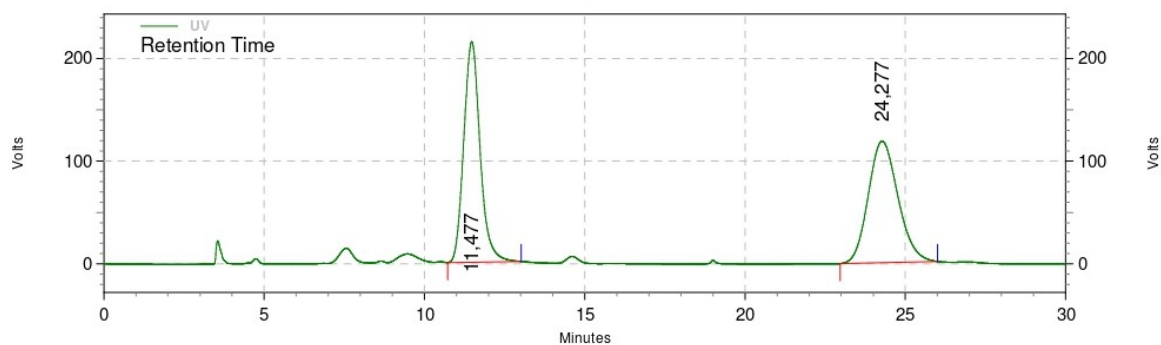

#### UV Results

| Retention Time | Area     | Area % | Height  | Height % |
|----------------|----------|--------|---------|----------|
| 11,477         | 30459204 | 49,95  | 859213  | 64,46    |
| 24,277         | 30521565 | 50,05  | 473826  | 35,54    |
| Totals         | 60980769 | 100,00 | 1333039 | 100,00   |

### Chiral HPLC chromatogram of chiral 3p

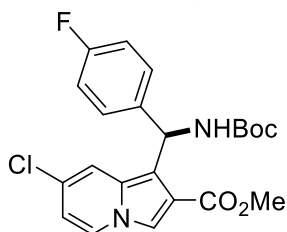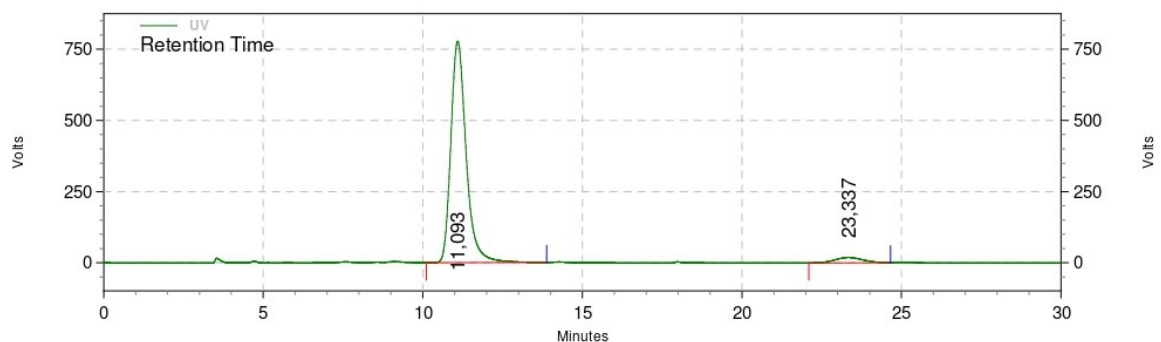

#### UV Results

| Retention Time | Area      | Area % | Height  | Height % |
|----------------|-----------|--------|---------|----------|
| 11,093         | 103740857 | 95,94  | 3113573 | 97,70    |
| 23,337         | 4389948   | 4,06   | 73326   | 2,30     |
| Totals         | 108130805 | 100,00 | 3186899 | 100,00   |

### Chiral HPLC chromatogram of racemic 4q

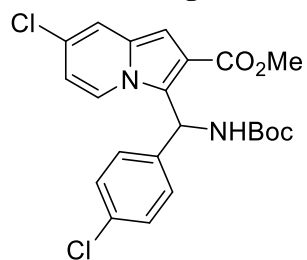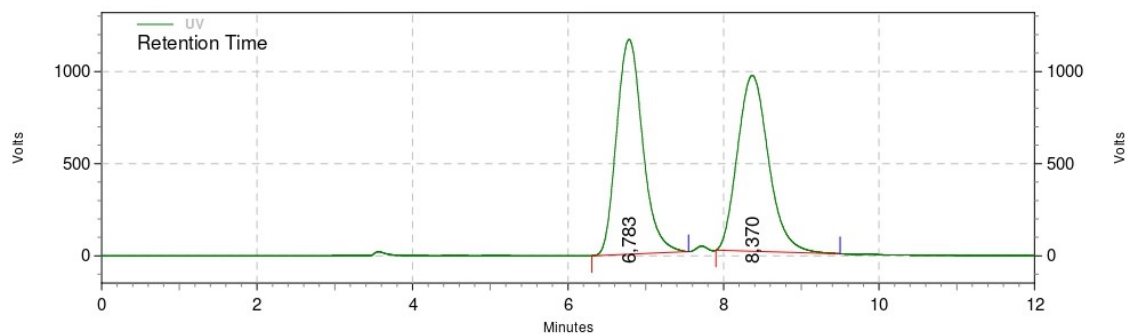

#### UV Results

| Retention Time | Area      | Area % | Height  | Height % |
|----------------|-----------|--------|---------|----------|
| 6,783          | 108477417 | 50,59  | 4657823 | 54,96    |
| 8,370          | 105938569 | 49,41  | 3817204 | 45,04    |

|        |           |        |         |        |
|--------|-----------|--------|---------|--------|
| Totals | 214415986 | 100,00 | 8475027 | 100,00 |
|--------|-----------|--------|---------|--------|

### Chiral HPLC chromatogram of chiral 4q

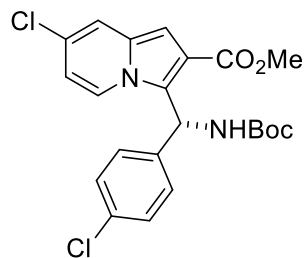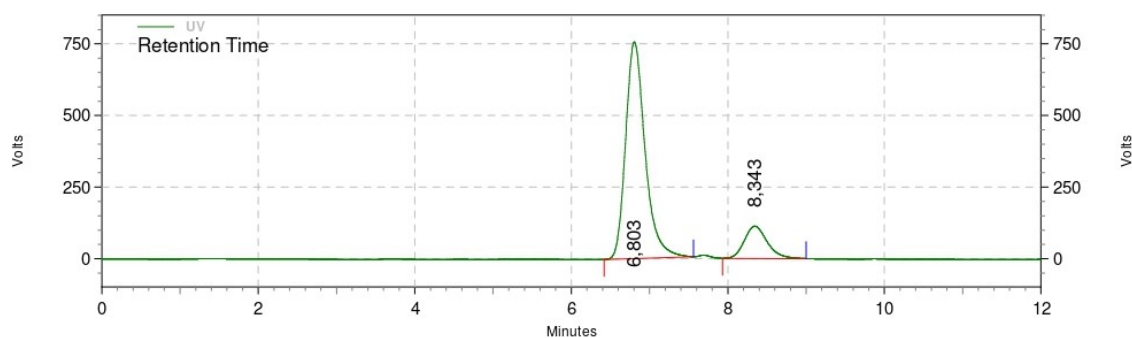

#### UV Results

| Retention Time | Area     | Area % | Height  | Height % |
|----------------|----------|--------|---------|----------|
| 6,803          | 52285006 | 85,15  | 3023314 | 87,06    |
| 8,343          | 9118776  | 14,85  | 449425  | 12,94    |

|        |          |        |         |        |
|--------|----------|--------|---------|--------|
| Totals | 61403782 | 100,00 | 3472739 | 100,00 |
|--------|----------|--------|---------|--------|

### Chiral HPLC chromatogram of racemic 3q

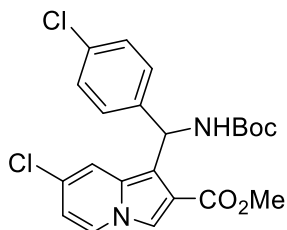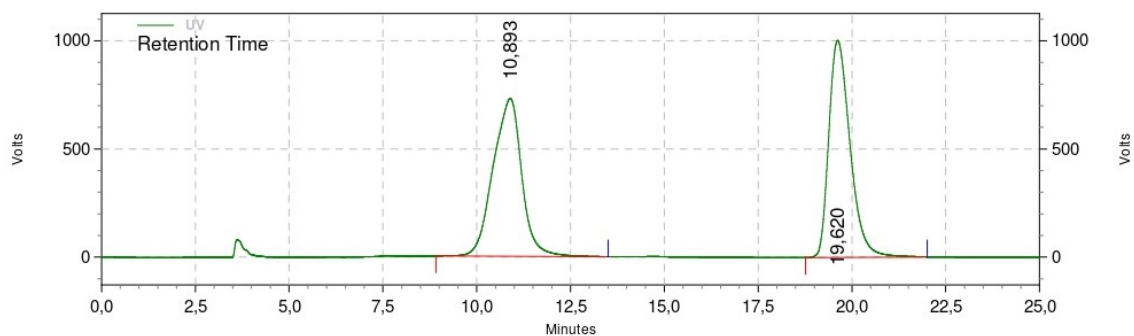

#### UV Results

| Retention Time | Area      | Area % | Height  | Height % |
|----------------|-----------|--------|---------|----------|
| 10,893         | 154799078 | 49,50  | 2918242 | 42,12    |
| 19,620         | 157953520 | 50,50  | 4009883 | 57,88    |

|        |           |        |         |        |
|--------|-----------|--------|---------|--------|
| Totals | 312752598 | 100,00 | 6928125 | 100,00 |
|--------|-----------|--------|---------|--------|

### Chiral HPLC chromatogram of chiral 3q

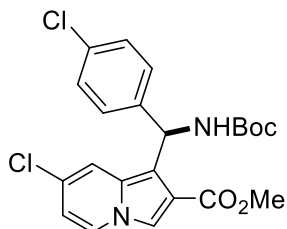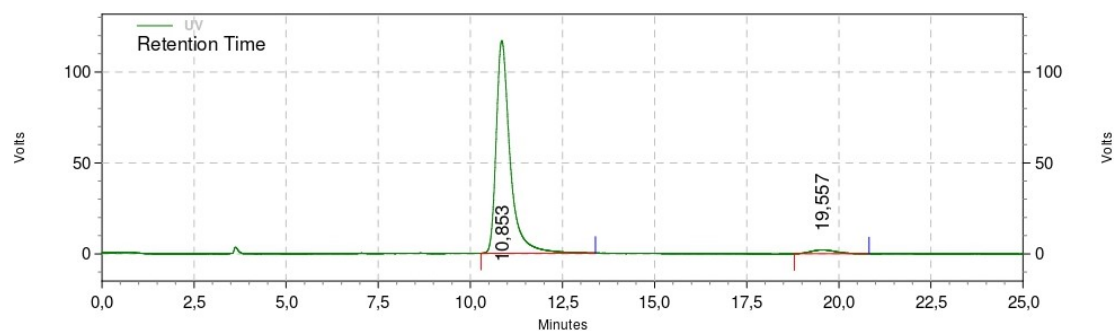

#### UV Results

| Retention Time | Area     | Area % | Height | Height % |
|----------------|----------|--------|--------|----------|
| 10,853         | 12249702 | 96,79  | 467443 | 98,21    |
| 19,557         | 406769   | 3,21   | 8505   | 1,79     |

|        |          |        |        |        |
|--------|----------|--------|--------|--------|
| Totals | 12656471 | 100,00 | 475948 | 100,00 |
|--------|----------|--------|--------|--------|

### Chiral HPLC chromatogram of racemic 4r

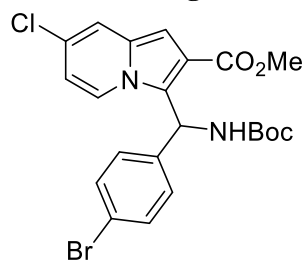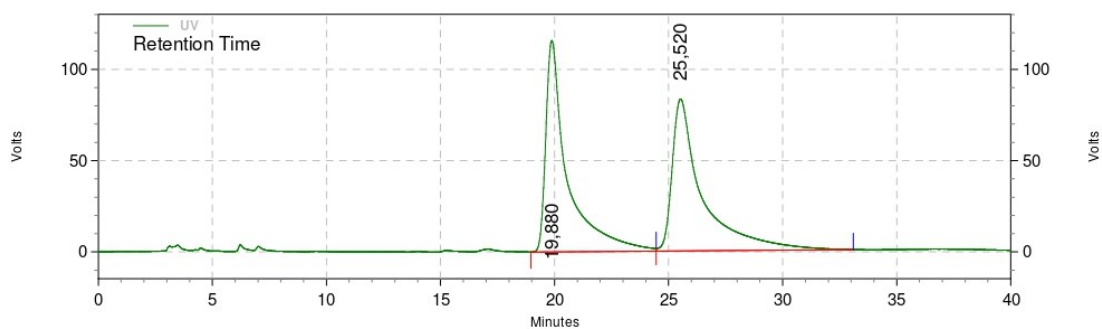

#### UV Results

| Retention Time | Area     | Area % | Height | Height % |
|----------------|----------|--------|--------|----------|
| 19,880         | 30234417 | 49,83  | 462768 | 58,18    |
| 25,520         | 30442331 | 50,17  | 332634 | 41,82    |

|        |          |        |        |        |
|--------|----------|--------|--------|--------|
| Totals | 60676748 | 100,00 | 795402 | 100,00 |
|--------|----------|--------|--------|--------|

### Chiral HPLC chromatogram of chiral 4r

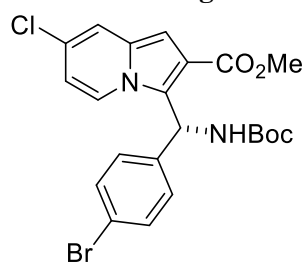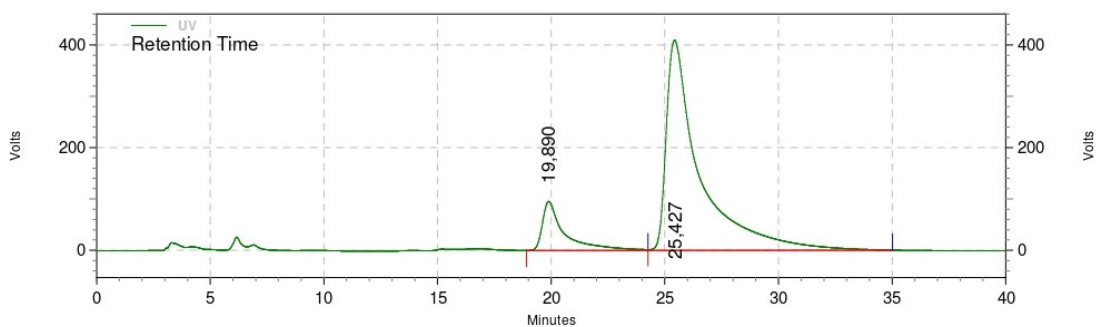

#### UV Results

| Retention Time | Area      | Area % | Height  | Height % |
|----------------|-----------|--------|---------|----------|
| 19,890         | 25544819  | 13,27  | 381653  | 18,90    |
| 25,427         | 166965521 | 86,73  | 1637737 | 81,10    |

|        |           |        |         |        |
|--------|-----------|--------|---------|--------|
| Totals | 192510340 | 100,00 | 2019390 | 100,00 |
|--------|-----------|--------|---------|--------|

### Chiral HPLC chromatogram of racemic 3r

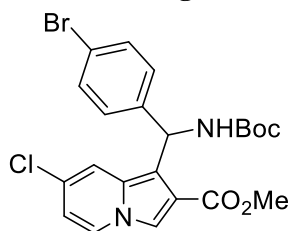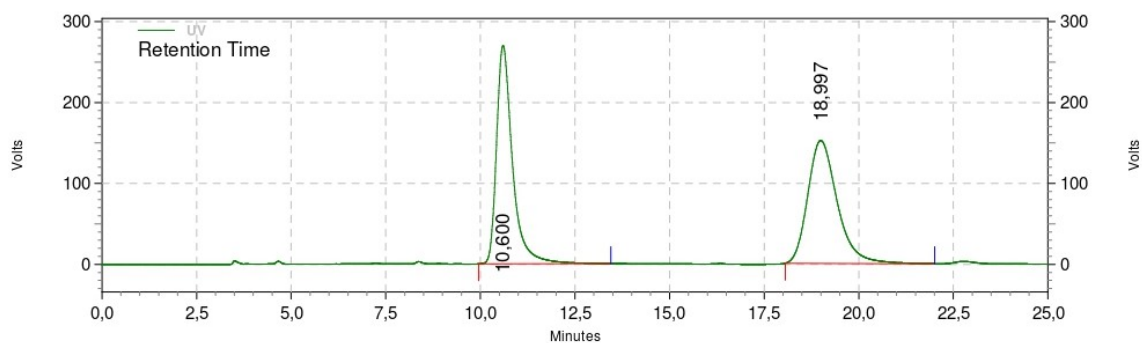

#### UV Results

| Retention Time | Area     | Area % | Height  | Height % |
|----------------|----------|--------|---------|----------|
| 10,600         | 31735217 | 49,16  | 1078983 | 63,98    |
| 18,997         | 32823291 | 50,84  | 607484  | 36,02    |

|        |          |        |         |        |
|--------|----------|--------|---------|--------|
| Totals | 64558508 | 100,00 | 1686467 | 100,00 |
|--------|----------|--------|---------|--------|

### Chiral HPLC chromatogram of chiral 3r

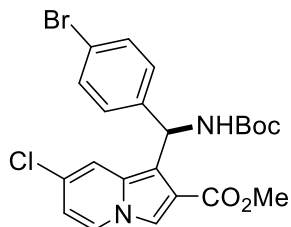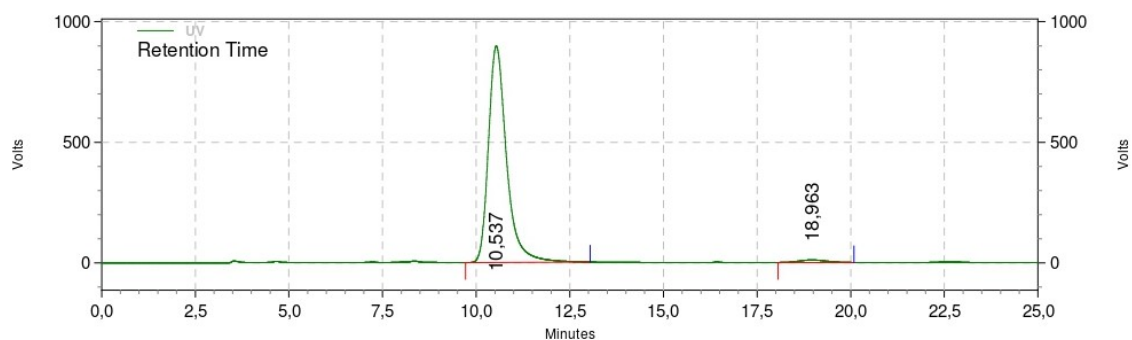

#### UV Results

| Retention Time | Area      | Area % | Height  | Height % |
|----------------|-----------|--------|---------|----------|
| 10,537         | 120885567 | 98,26  | 3591485 | 98,85    |
| 18,963         | 2146028   | 1,74   | 41828   | 1,15     |

|        |           |        |         |        |
|--------|-----------|--------|---------|--------|
| Totals | 123031595 | 100,00 | 3633313 | 100,00 |
|--------|-----------|--------|---------|--------|

### Chiral HPLC chromatogram of racemic 4s

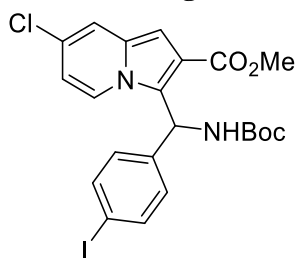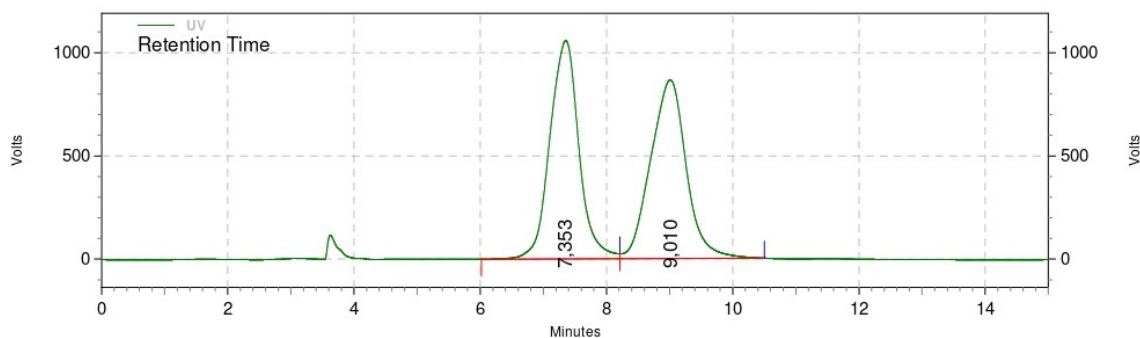

#### UV Results

| Retention Time | Area      | Area % | Height  | Height % |
|----------------|-----------|--------|---------|----------|
| 7,353          | 135463638 | 50,00  | 4231862 | 54,99    |
| 9,010          | 135443752 | 50,00  | 3463222 | 45,01    |

|        |           |        |         |        |
|--------|-----------|--------|---------|--------|
| Totals | 270907390 | 100,00 | 7695084 | 100,00 |
|--------|-----------|--------|---------|--------|

### Chiral HPLC chromatogram of chiral 4s

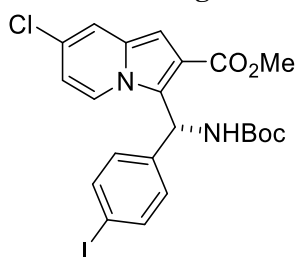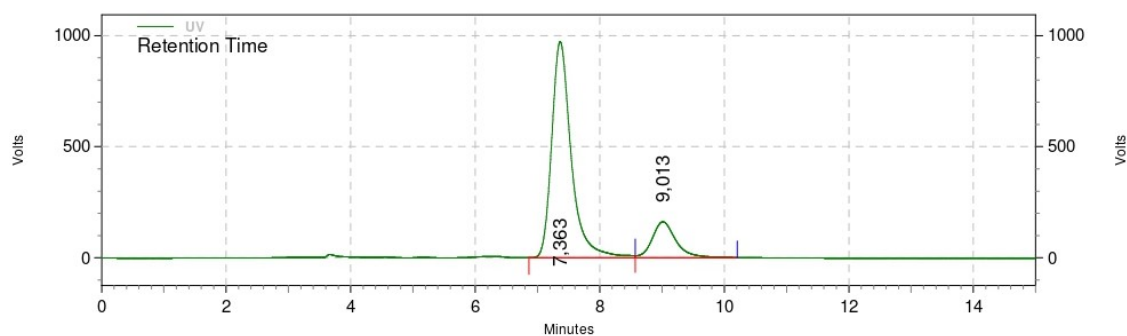

#### UV Results

| Retention Time | Area     | Area % | Height  | Height % |
|----------------|----------|--------|---------|----------|
| 7,363          | 85013464 | 83,33  | 3888435 | 85,76    |
| 9,013          | 17004335 | 16,67  | 645863  | 14,24    |

|        |           |        |         |        |
|--------|-----------|--------|---------|--------|
| Totals | 102017799 | 100,00 | 4534298 | 100,00 |
|--------|-----------|--------|---------|--------|



### Chiral HPLC chromatogram of racemic 3s

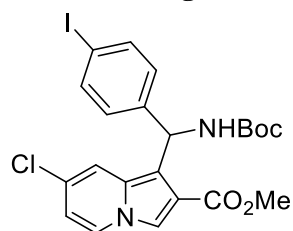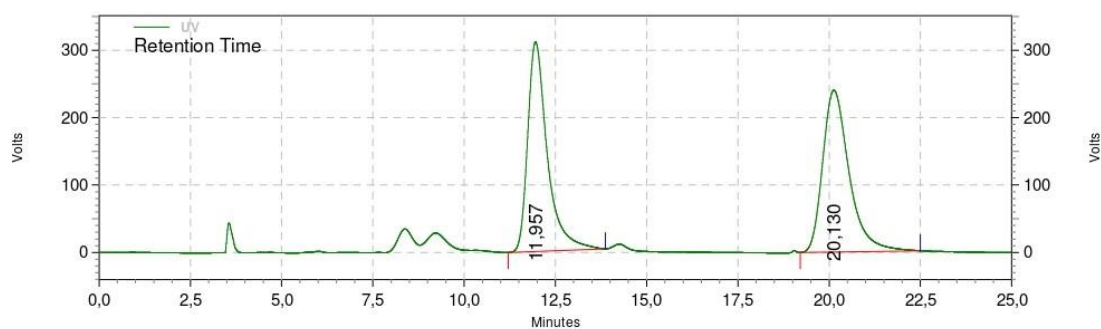

#### UV Results

| Retention Time | Area     | Area % | Height  | Height % |
|----------------|----------|--------|---------|----------|
| 11,957         | 46519908 | 49,06  | 1243455 | 56,42    |
| 20,130         | 48299321 | 50,94  | 960497  | 43,58    |
| Totals         | 94819229 | 100,00 | 2203952 | 100,00   |

### Chiral HPLC chromatogram of chiral 3s

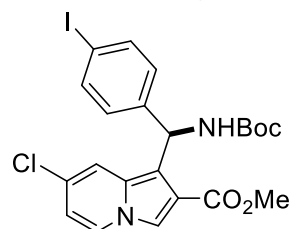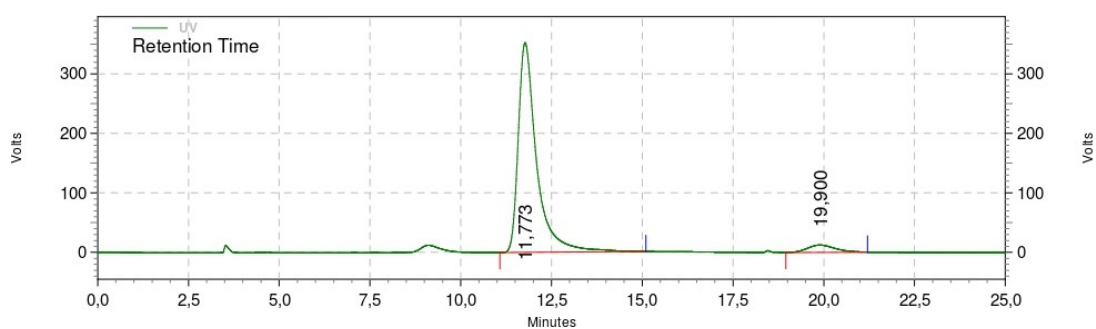

#### UV Results

| Retention Time | Area     | Area % | Height  | Height % |
|----------------|----------|--------|---------|----------|
| 11,773         | 49567689 | 95,09  | 1410597 | 96,67    |
| 19,900         | 2556816  | 4,91   | 48527   | 3,33     |
| Totals         | 52124505 | 100,00 | 1459124 | 100,00   |

### Chiral HPLC chromatogram of racemic 10

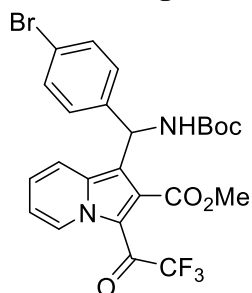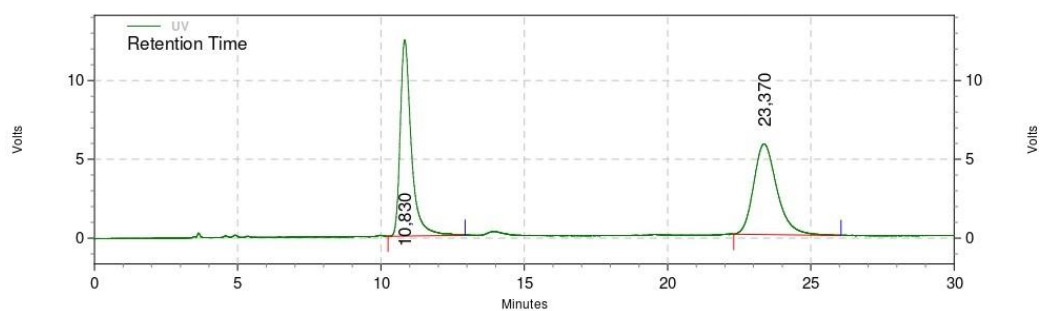

#### UV Results

| Retention Time | Area    | Area % | Height | Height % |
|----------------|---------|--------|--------|----------|
| 10,830         | 1340137 | 50,76  | 49733  | 68,37    |
| 23,370         | 1299840 | 49,24  | 23005  | 31,63    |
| Totals         | 2639977 | 100,00 | 72738  | 100,00   |

### Chiral HPLC chromatogram of chiral 10

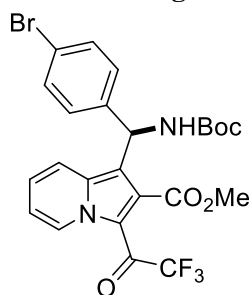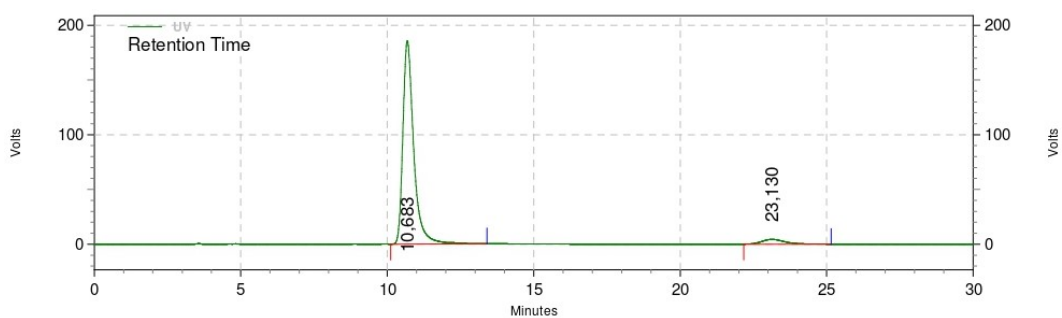

#### UV Results

| Retention Time | Area     | Area % | Height | Height % |
|----------------|----------|--------|--------|----------|
| 10,683         | 19107318 | 95,31  | 742401 | 97,71    |
| 23,130         | 940529   | 4,69   | 17415  | 2,29     |
| Totals         | 20047847 | 100,00 | 759816 | 100,00   |

## 8.2. Cbz-protected products 6a-m, 7a-m, 8 and 9

Chiral HPLC chromatogram of racemic 6a

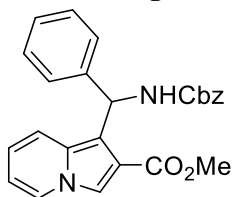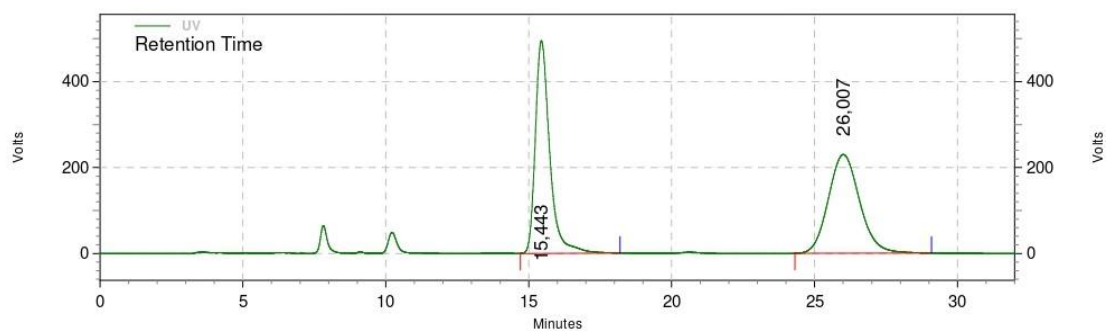

### UV Results

| Retention Time | Area      | Area % | Height  | Height % |
|----------------|-----------|--------|---------|----------|
| 15,443         | 69365685  | 49,83  | 1978993 | 68,28    |
| 26,007         | 69840348  | 50,17  | 919150  | 31,72    |
| Totals         | 139206033 | 100,00 | 2898143 | 100,00   |

Chiral HPLC chromatogram of chiral 6a

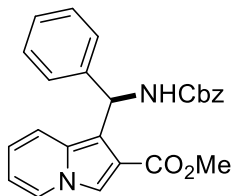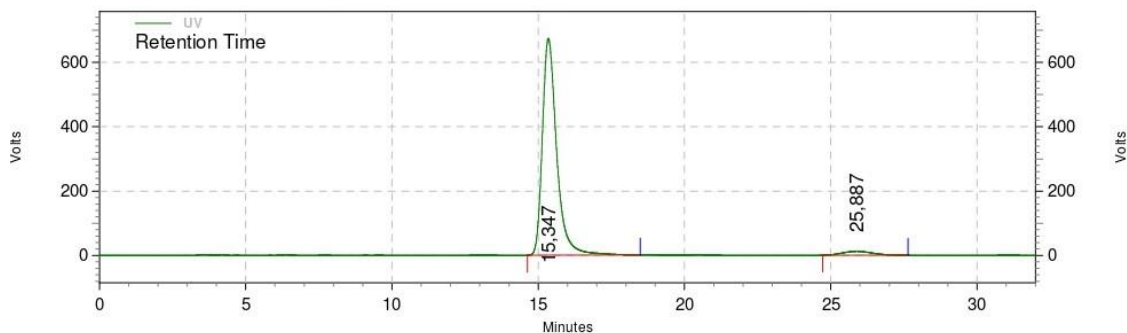

### UV Results

| Retention Time | Area     | Area % | Height  | Height % |
|----------------|----------|--------|---------|----------|
| 15,347         | 91942914 | 96,29  | 2694190 | 98,21    |
| 25,887         | 3545400  | 3,71   | 49093   | 1,79     |
| Totals         | 95488314 | 100,00 | 2743283 | 100,00   |

### Chiral HPLC chromatogram of racemic 6m

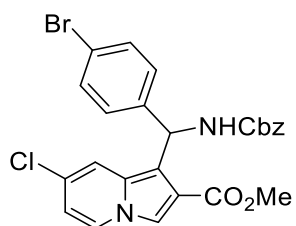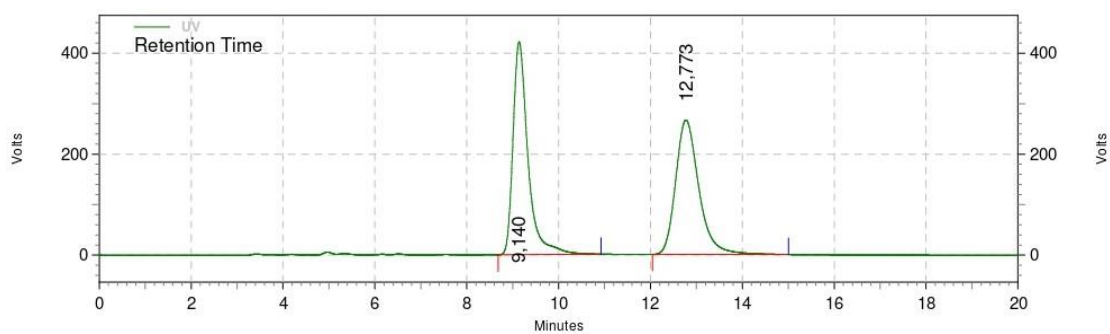

#### UV Results

| Retention Time | Area     | Area % | Height  | Height % |
|----------------|----------|--------|---------|----------|
| 9,140          | 38140437 | 50,48  | 1685982 | 61,27    |
| 12,773         | 37411700 | 49,52  | 1065617 | 38,73    |

|        |          |        |         |        |
|--------|----------|--------|---------|--------|
| Totals | 75552137 | 100,00 | 2751599 | 100,00 |
|--------|----------|--------|---------|--------|

### Chiral HPLC chromatogram of chiral 6m

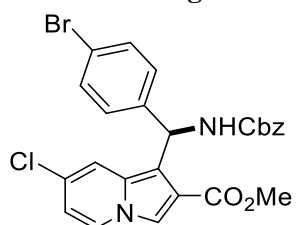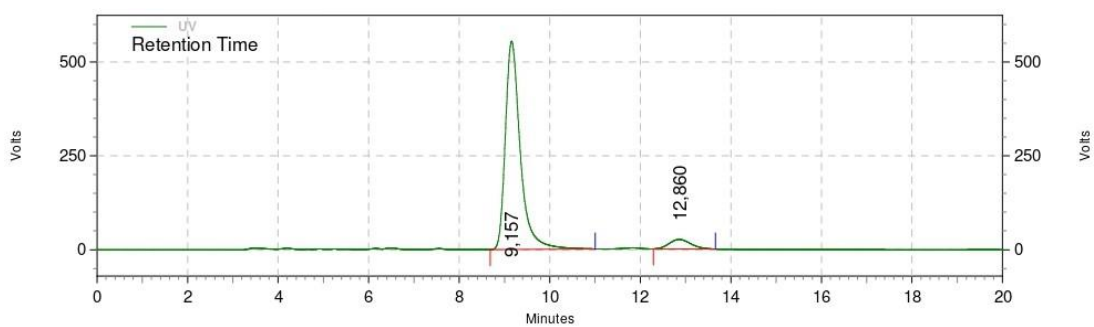

#### UV Results

| Retention Time | Area     | Area % | Height  | Height % |
|----------------|----------|--------|---------|----------|
| 9,157          | 50895054 | 93,76  | 2217860 | 95,61    |
| 12,860         | 3385925  | 6,24   | 101862  | 4,39     |

|        |          |        |         |        |
|--------|----------|--------|---------|--------|
| Totals | 54280979 | 100,00 | 2319722 | 100,00 |
|--------|----------|--------|---------|--------|

### Chiral HPLC chromatogram of racemic 7a

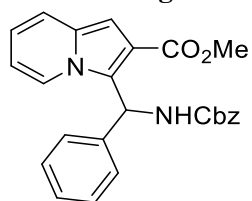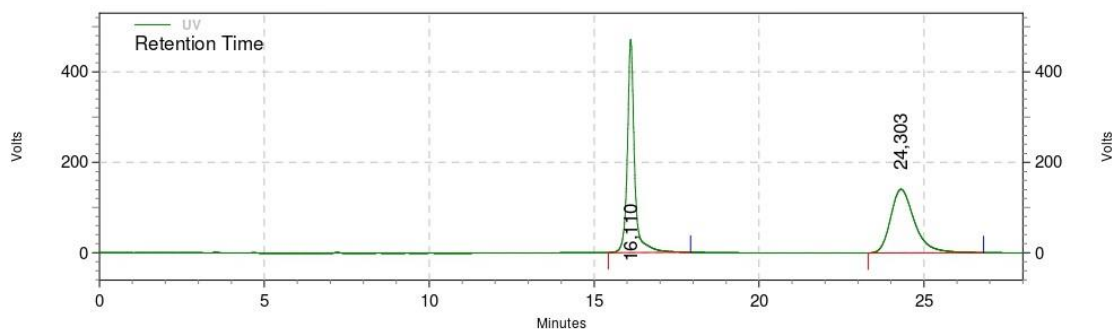

#### UV Results

| Retention Time | Area     | Area % | Height  | Height % |
|----------------|----------|--------|---------|----------|
| 16,110         | 28594506 | 50,22  | 1883409 | 76,98    |
| 24,303         | 28347647 | 49,78  | 563283  | 23,02    |

|        |          |        |         |        |
|--------|----------|--------|---------|--------|
| Totals | 56942153 | 100,00 | 2446692 | 100,00 |
|--------|----------|--------|---------|--------|

### Chiral HPLC chromatogram of chiral 7a

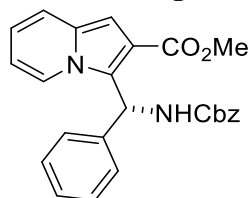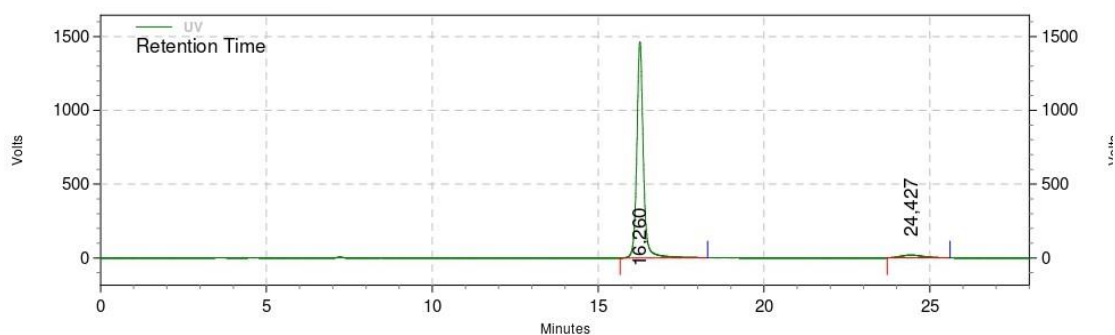

#### UV Results

| Retention Time | Area     | Area % | Height  | Height % |
|----------------|----------|--------|---------|----------|
| 16,260         | 80241847 | 95,78  | 5851310 | 98,74    |
| 24,427         | 3537931  | 4,22   | 74863   | 1,26     |

|        |          |        |         |        |
|--------|----------|--------|---------|--------|
| Totals | 83779778 | 100,00 | 5926173 | 100,00 |
|--------|----------|--------|---------|--------|

### Chiral HPLC chromatogram of racemic 7b

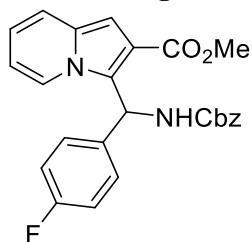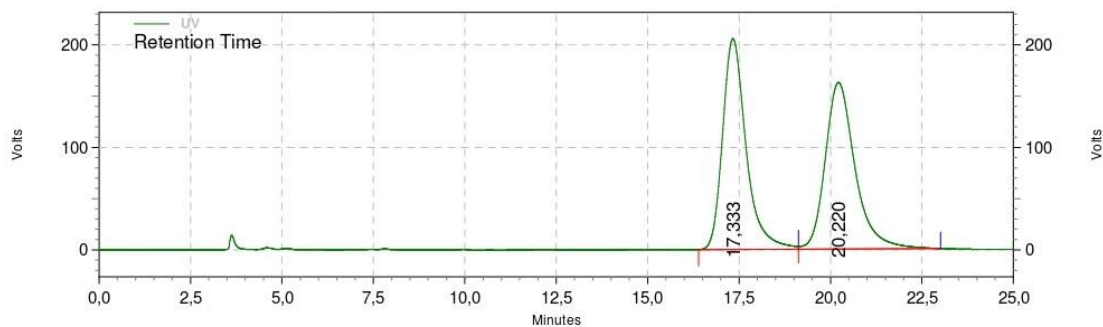

#### UV Results

| Retention Time | Area     | Area % | Height | Height % |
|----------------|----------|--------|--------|----------|
| 17,333         | 36789410 | 49,98  | 823145 | 55,86    |
| 20,220         | 36816227 | 50,02  | 650431 | 44,14    |

|        |          |        |         |        |
|--------|----------|--------|---------|--------|
| Totals | 73605637 | 100,00 | 1473576 | 100,00 |
|--------|----------|--------|---------|--------|

### Chiral HPLC chromatogram of chiral 7b

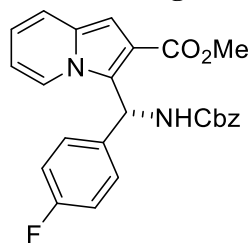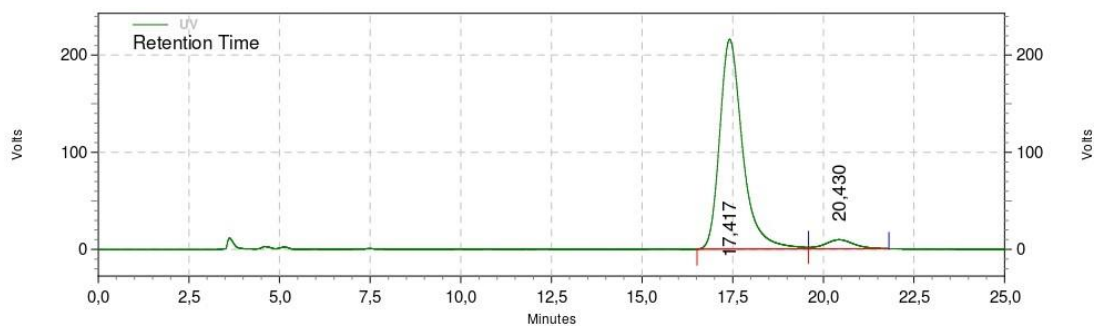

#### UV Results

| Retention Time | Area     | Area % | Height | Height % |
|----------------|----------|--------|--------|----------|
| 17,417         | 38047717 | 94,85  | 863073 | 95,86    |
| 20,430         | 2065399  | 5,15   | 37258  | 4,14     |

|        |          |        |        |        |
|--------|----------|--------|--------|--------|
| Totals | 40113116 | 100,00 | 900331 | 100,00 |
|--------|----------|--------|--------|--------|

### Chiral HPLC chromatogram of racemic 7c

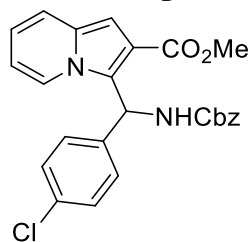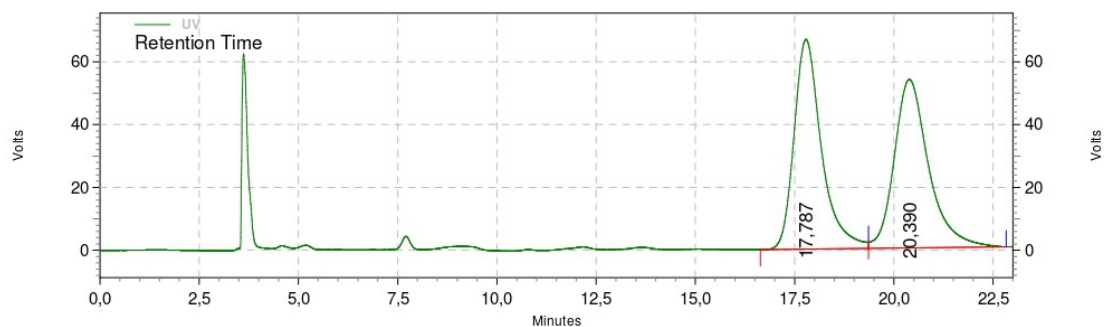

#### UV Results

| Retention Time | Area     | Area % | Height | Height % |
|----------------|----------|--------|--------|----------|
| 17,787         | 12813197 | 49,81  | 267084 | 55,43    |
| 20,390         | 12912551 | 50,19  | 214722 | 44,57    |

|        |          |        |        |        |
|--------|----------|--------|--------|--------|
| Totals | 25725748 | 100,00 | 481806 | 100,00 |
|--------|----------|--------|--------|--------|

### Chiral HPLC chromatogram of chiral 7c

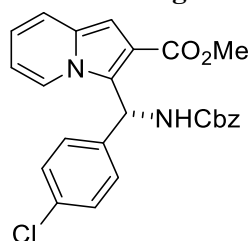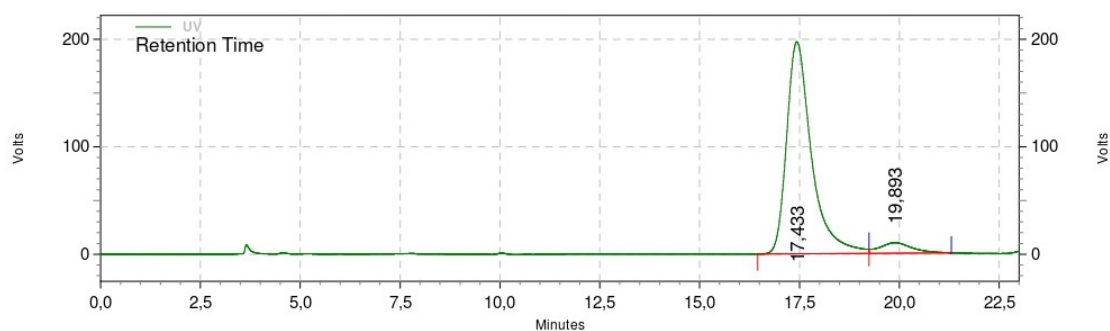

#### UV Results

| Retention Time | Area     | Area % | Height | Height % |
|----------------|----------|--------|--------|----------|
| 17,433         | 34130624 | 93,99  | 788667 | 95,29    |
| 19,893         | 2182029  | 6,01   | 39023  | 4,71     |

|        |          |        |        |        |
|--------|----------|--------|--------|--------|
| Totals | 36312653 | 100,00 | 827690 | 100,00 |
|--------|----------|--------|--------|--------|

### Chiral HPLC chromatogram of racemic 7d

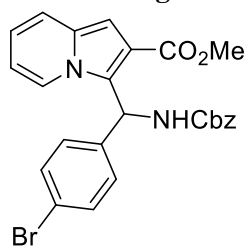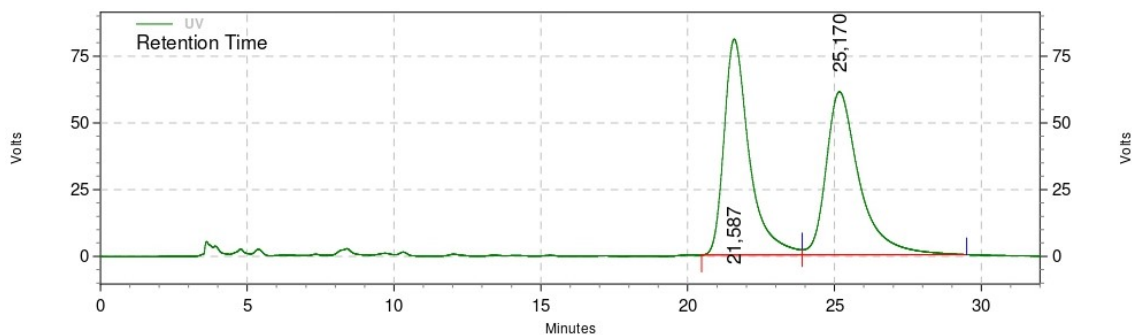

#### UV Results

| Retention Time | Area     | Area % | Height | Height % |
|----------------|----------|--------|--------|----------|
| 21,587         | 19347005 | 50,14  | 323315 | 56,95    |
| 25,170         | 19241111 | 49,86  | 244381 | 43,05    |

|        |          |        |        |        |
|--------|----------|--------|--------|--------|
| Totals | 38588116 | 100,00 | 567696 | 100,00 |
|--------|----------|--------|--------|--------|

### Chiral HPLC chromatogram of chiral 7d

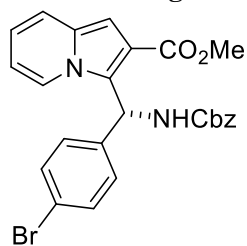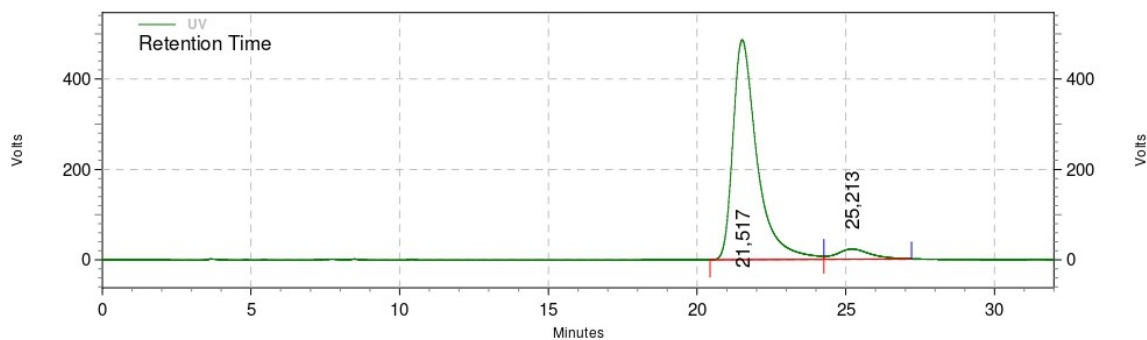

#### UV Results

| Retention Time | Area      | Area % | Height  | Height % |
|----------------|-----------|--------|---------|----------|
| 21,517         | 110020102 | 94,03  | 1944345 | 95,57    |
| 25,213         | 6981304   | 5,97   | 90097   | 4,43     |

|        |           |        |         |        |
|--------|-----------|--------|---------|--------|
| Totals | 117001406 | 100,00 | 2034442 | 100,00 |
|--------|-----------|--------|---------|--------|



### Chiral HPLC chromatogram of racemic 7e

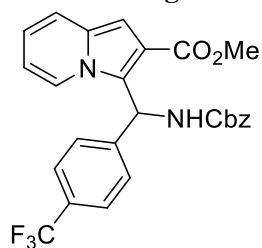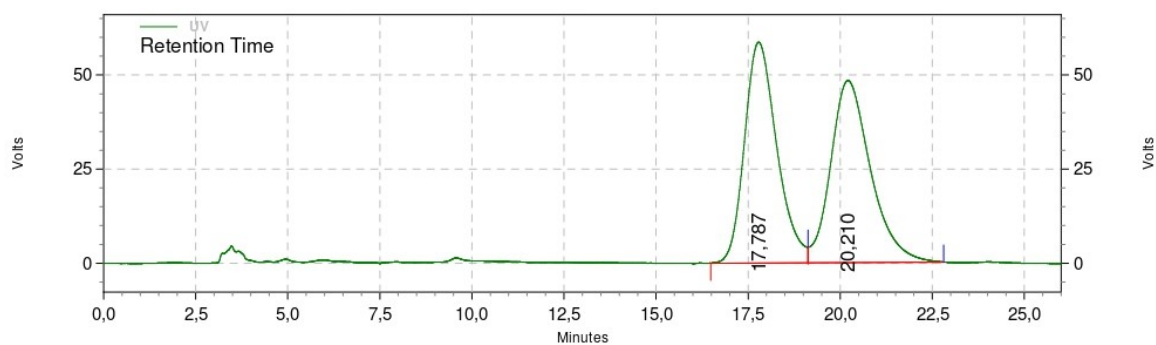

#### UV Results

| Retention Time | Area     | Area % | Height | Height % |
|----------------|----------|--------|--------|----------|
| 17,787         | 14328865 | 49,61  | 234570 | 54,81    |
| 20,210         | 14556071 | 50,39  | 193383 | 45,19    |

|        |          |        |        |        |
|--------|----------|--------|--------|--------|
| Totals | 28884936 | 100,00 | 427953 | 100,00 |
|--------|----------|--------|--------|--------|

### Chiral HPLC chromatogram of chiral 7e

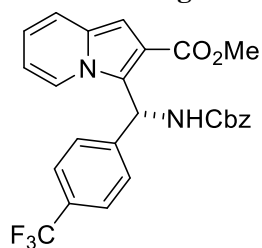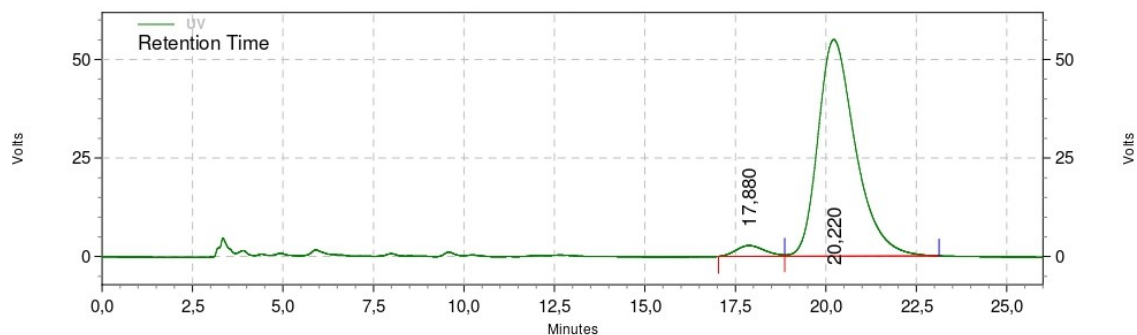

#### UV Results

| Retention Time | Area     | Area % | Height | Height % |
|----------------|----------|--------|--------|----------|
| 17,880         | 598905   | 3,65   | 10904  | 4,73     |
| 20,220         | 15802317 | 96,35  | 219819 | 95,27    |

|        |          |        |        |        |
|--------|----------|--------|--------|--------|
| Totals | 16401222 | 100,00 | 230723 | 100,00 |
|--------|----------|--------|--------|--------|

### Chiral HPLC chromatogram of racemic 7f

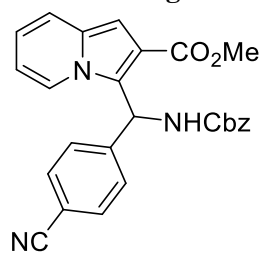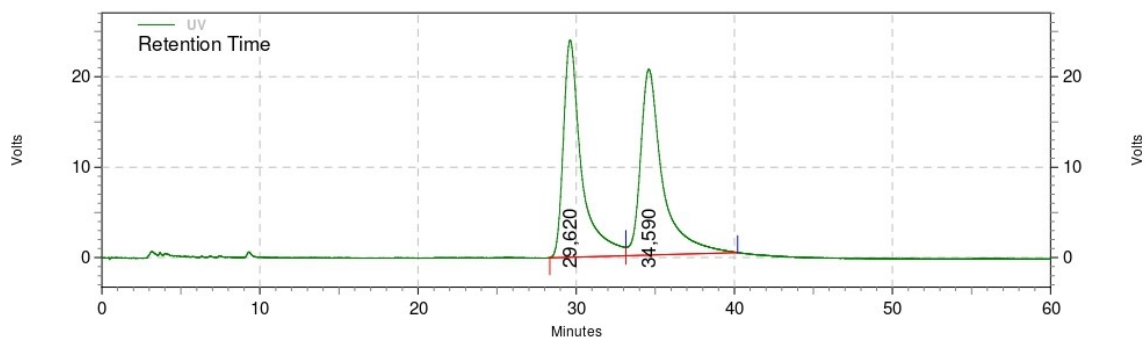

#### UV Results

| Retention Time | Area     | Area % | Height | Height % |
|----------------|----------|--------|--------|----------|
| 29,620         | 7664783  | 49,06  | 96033  | 53,90    |
| 34,590         | 7957432  | 50,94  | 82150  | 46,10    |
| Totals         | 15622215 | 100,00 | 178183 | 100,00   |

### Chiral HPLC chromatogram of chiral 7f

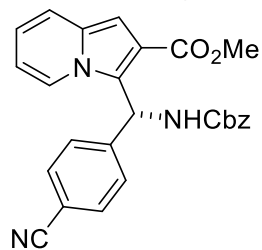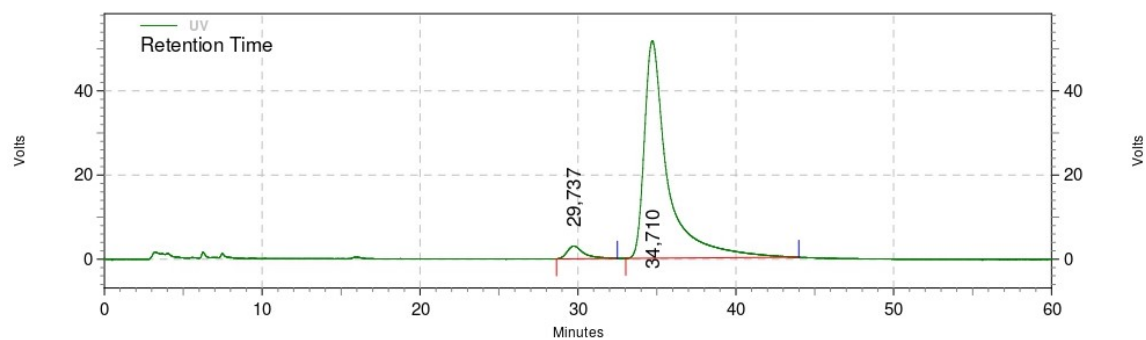

#### UV Results

| Retention Time | Area     | Area % | Height | Height % |
|----------------|----------|--------|--------|----------|
| 29,737         | 872864   | 3,95   | 12060  | 5,51     |
| 34,710         | 21231728 | 96,05  | 206721 | 94,49    |
| Totals         | 22104592 | 100,00 | 218781 | 100,00   |

### Chiral HPLC chromatogram of racemic 7g

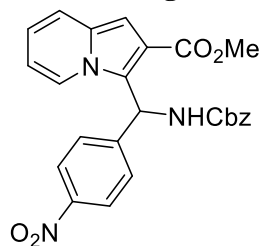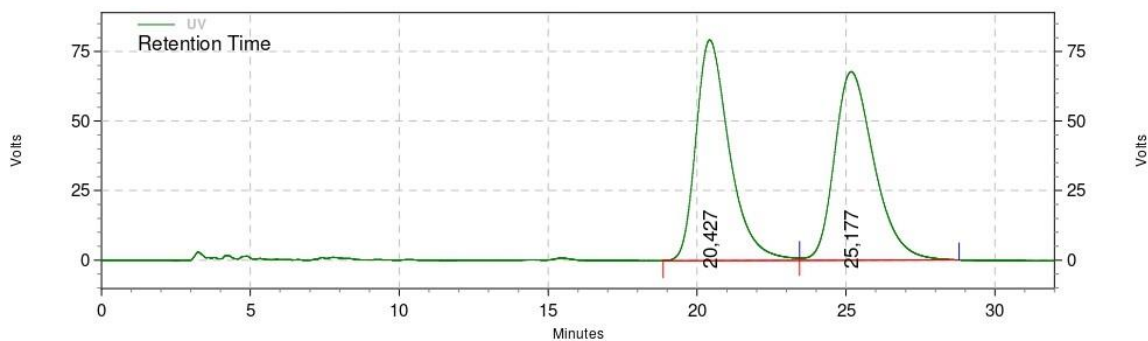

#### UV Results

| Retention Time | Area     | Area % | Height | Height % |
|----------------|----------|--------|--------|----------|
| 20,427         | 24814643 | 49,75  | 317107 | 53,91    |
| 25,177         | 25065541 | 50,25  | 271064 | 46,09    |

|        |          |        |        |        |
|--------|----------|--------|--------|--------|
| Totals | 49880184 | 100,00 | 588171 | 100,00 |
|--------|----------|--------|--------|--------|

### Chiral HPLC chromatogram of chiral 7g

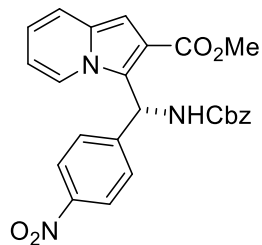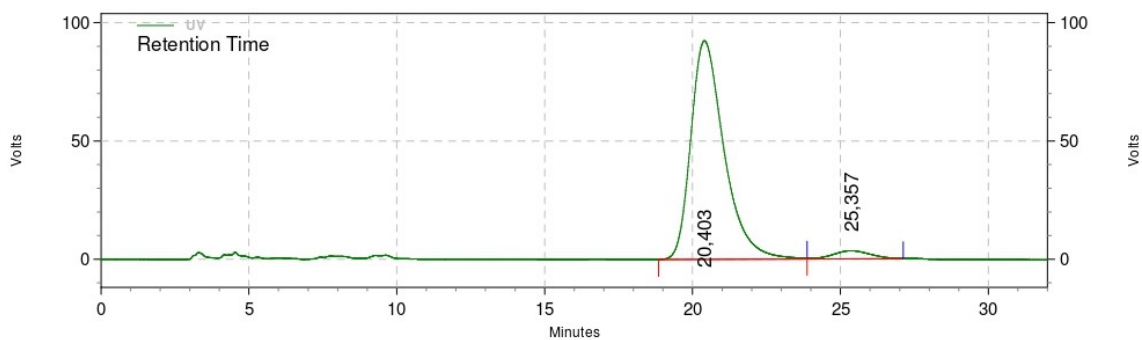

#### UV Results

| Retention Time | Area     | Area % | Height | Height % |
|----------------|----------|--------|--------|----------|
| 20,403         | 28897309 | 96,12  | 369681 | 96,48    |
| 25,357         | 1167012  | 3,88   | 13495  | 3,52     |

|        |          |        |        |        |
|--------|----------|--------|--------|--------|
| Totals | 30064321 | 100,00 | 383176 | 100,00 |
|--------|----------|--------|--------|--------|

### Chiral HPLC chromatogram of racemic 7h

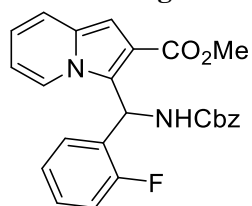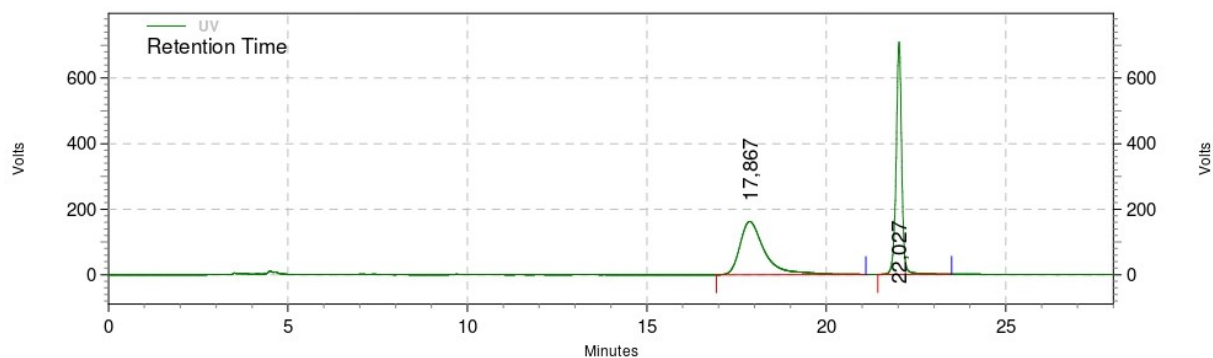

#### UV Results

| Retention Time | Area     | Area % | Height  | Height % |
|----------------|----------|--------|---------|----------|
| 17,867         | 30850719 | 50,25  | 649380  | 18,65    |
| 22,027         | 30541502 | 49,75  | 2832603 | 81,35    |

|        |          |        |         |        |
|--------|----------|--------|---------|--------|
| Totals | 61392221 | 100,00 | 3481983 | 100,00 |
|--------|----------|--------|---------|--------|

### Chiral HPLC chromatogram of chiral 7h

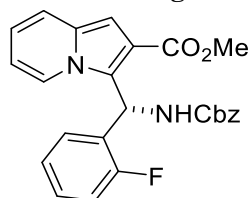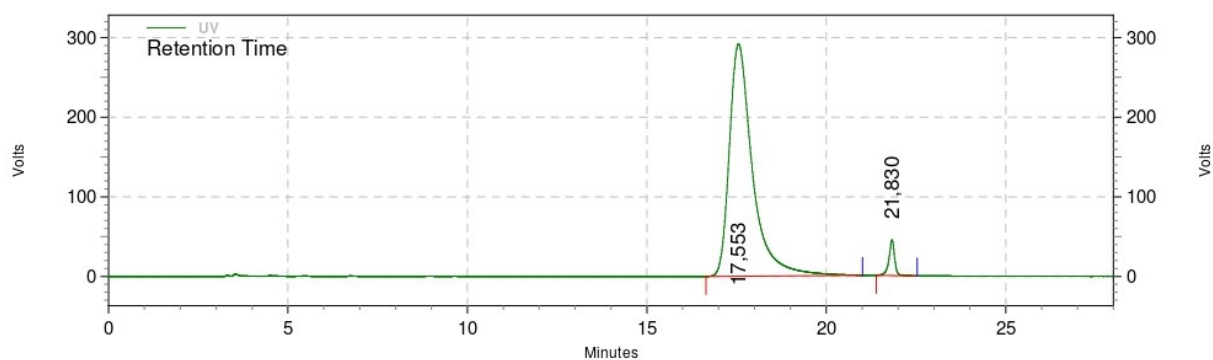

#### UV Results

| Retention Time | Area     | Area % | Height  | Height % |
|----------------|----------|--------|---------|----------|
| 17,553         | 52242219 | 96,42  | 1166984 | 86,68    |
| 21,830         | 1941787  | 3,58   | 179386  | 13,32    |

|        |          |        |         |        |
|--------|----------|--------|---------|--------|
| Totals | 54184006 | 100,00 | 1346370 | 100,00 |
|--------|----------|--------|---------|--------|

### Chiral HPLC chromatogram of racemic 7i

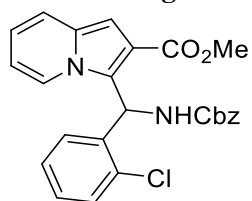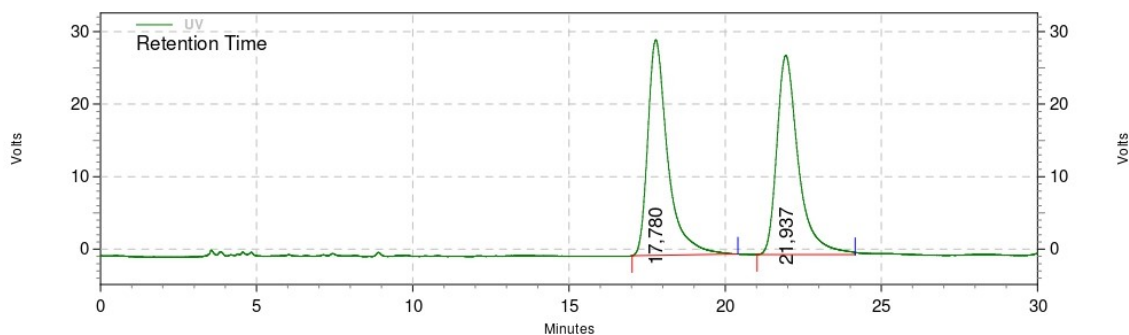

#### UV Results

| Retention Time | Area    | Area % | Height | Height % |
|----------------|---------|--------|--------|----------|
| 17,780         | 5288274 | 50,01  | 118878 | 51,95    |
| 21,937         | 5287074 | 49,99  | 109953 | 48,05    |

|        |          |        |        |        |
|--------|----------|--------|--------|--------|
| Totals | 10575348 | 100,00 | 228831 | 100,00 |
|--------|----------|--------|--------|--------|

### Chiral HPLC chromatogram of chiral 7i

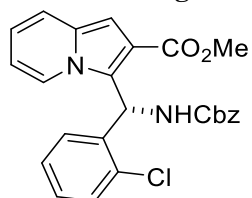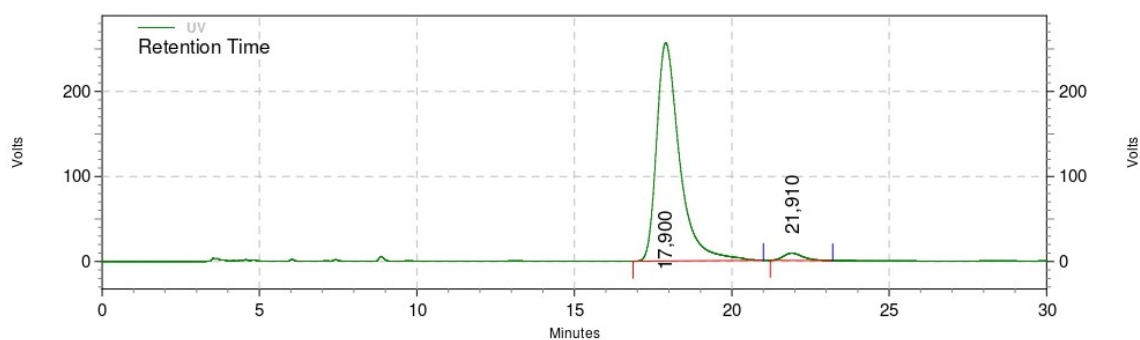

#### UV Results

| Retention Time | Area     | Area % | Height  | Height % |
|----------------|----------|--------|---------|----------|
| 17,900         | 52070667 | 97,29  | 1026479 | 96,78    |
| 21,910         | 1451321  | 2,71   | 34177   | 3,22     |

|        |          |        |         |        |
|--------|----------|--------|---------|--------|
| Totals | 53521988 | 100,00 | 1060656 | 100,00 |
|--------|----------|--------|---------|--------|

### Chiral HPLC chromatogram of racemic 7j

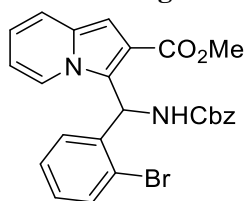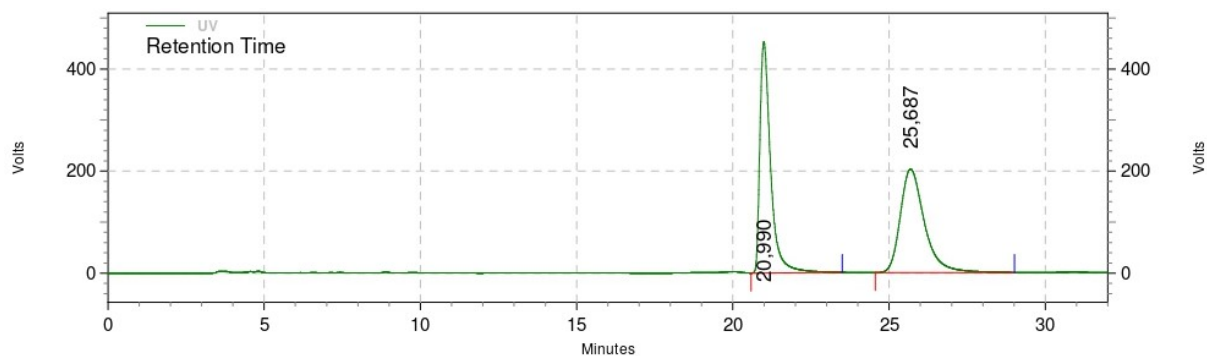

#### UV Results

| Retention Time | Area     | Area % | Height  | Height % |
|----------------|----------|--------|---------|----------|
| 20,990         | 43321883 | 49,93  | 1810862 | 69,06    |
| 25,687         | 43448102 | 50,07  | 811370  | 30,94    |

|        |          |        |         |        |
|--------|----------|--------|---------|--------|
| Totals | 86769985 | 100,00 | 2622232 | 100,00 |
|--------|----------|--------|---------|--------|

### Chiral HPLC chromatogram of chiral 7j

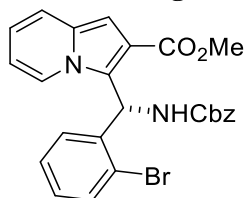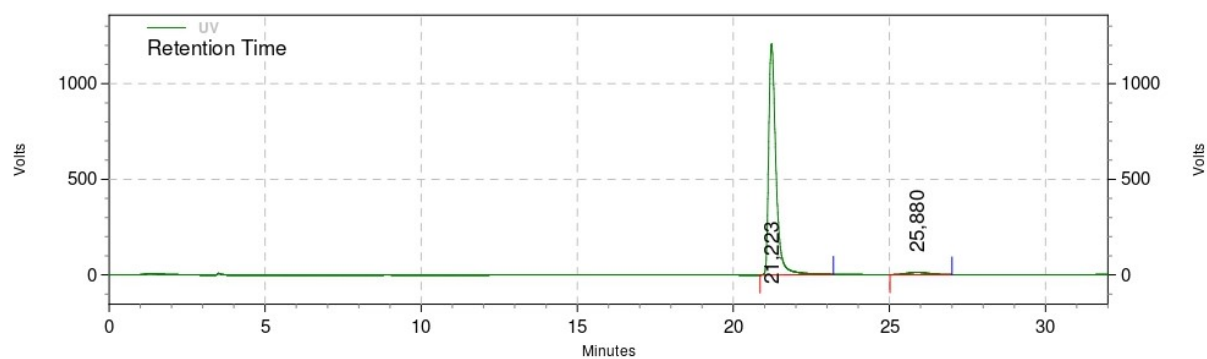

#### UV Results

| Retention Time | Area     | Area % | Height  | Height % |
|----------------|----------|--------|---------|----------|
| 21,223         | 78409346 | 96,93  | 4831179 | 99,00    |
| 25,880         | 2485160  | 3,07   | 48843   | 1,00     |

|        |          |        |         |        |
|--------|----------|--------|---------|--------|
| Totals | 80894506 | 100,00 | 4880022 | 100,00 |
|--------|----------|--------|---------|--------|

### Chiral HPLC chromatogram of racemic 7k

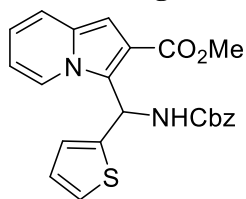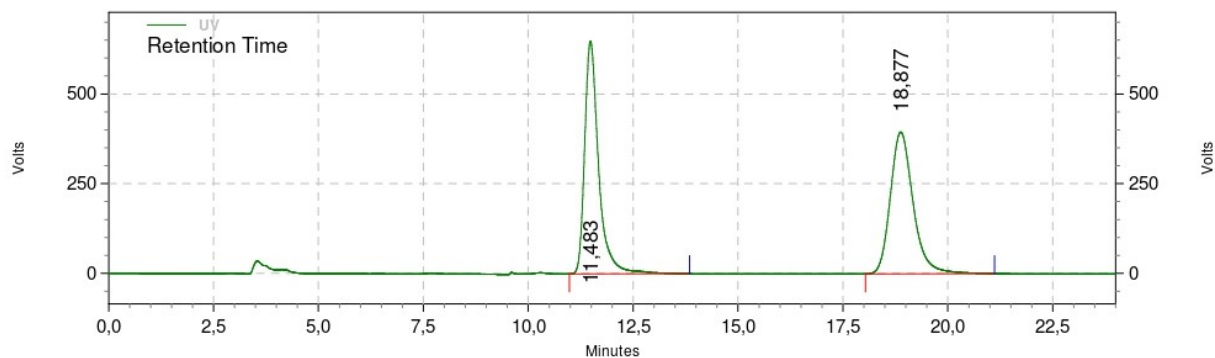

#### UV Results

| Retention Time | Area     | Area % | Height  | Height % |
|----------------|----------|--------|---------|----------|
| 11,483         | 60177896 | 50,23  | 2593052 | 62,13    |
| 18,877         | 59628645 | 49,77  | 1580638 | 37,87    |

|        |           |        |         |        |
|--------|-----------|--------|---------|--------|
| Totals | 119806541 | 100,00 | 4173690 | 100,00 |
|--------|-----------|--------|---------|--------|

### Chiral HPLC chromatogram of chiral 7k

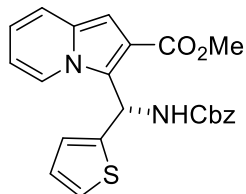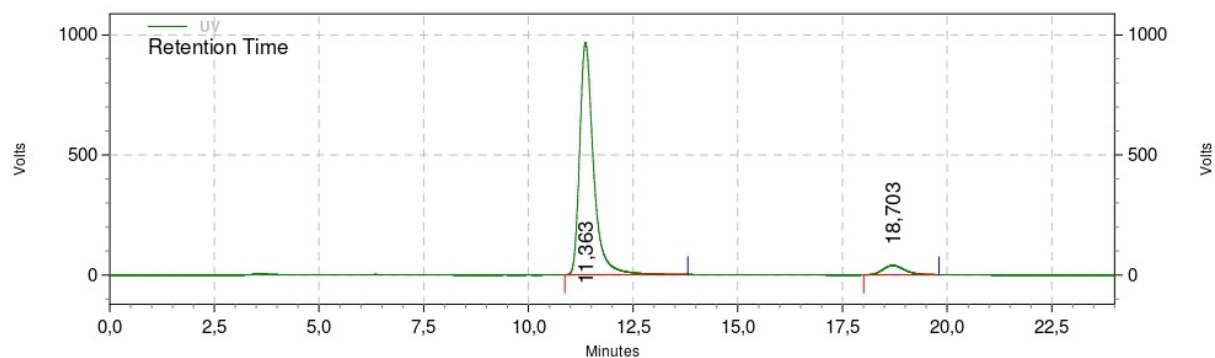

#### UV Results

| Retention Time | Area     | Area % | Height  | Height % |
|----------------|----------|--------|---------|----------|
| 11,363         | 88960921 | 93,95  | 3867149 | 96,09    |
| 18,703         | 5725310  | 6,05   | 157233  | 3,91     |

|        |          |        |         |        |
|--------|----------|--------|---------|--------|
| Totals | 94686231 | 100,00 | 4024382 | 100,00 |
|--------|----------|--------|---------|--------|

### Chiral HPLC chromatogram of racemic 7l

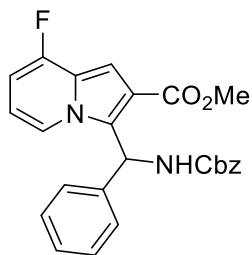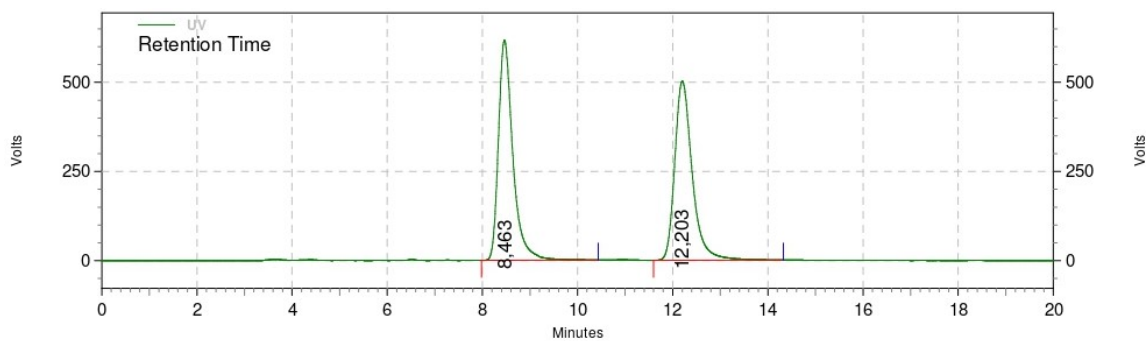

#### UV Results

| Retention Time | Area     | Area % | Height  | Height % |
|----------------|----------|--------|---------|----------|
| 8,463          | 52188780 | 50,39  | 2469300 | 55,12    |
| 12,203         | 51383098 | 49,61  | 2010967 | 44,88    |

|        |           |        |         |        |
|--------|-----------|--------|---------|--------|
| Totals | 103571878 | 100,00 | 4480267 | 100,00 |
|--------|-----------|--------|---------|--------|

### Chiral HPLC chromatogram of chiral 7l

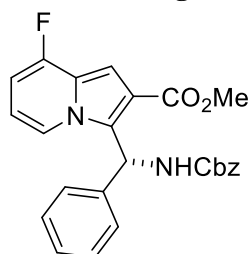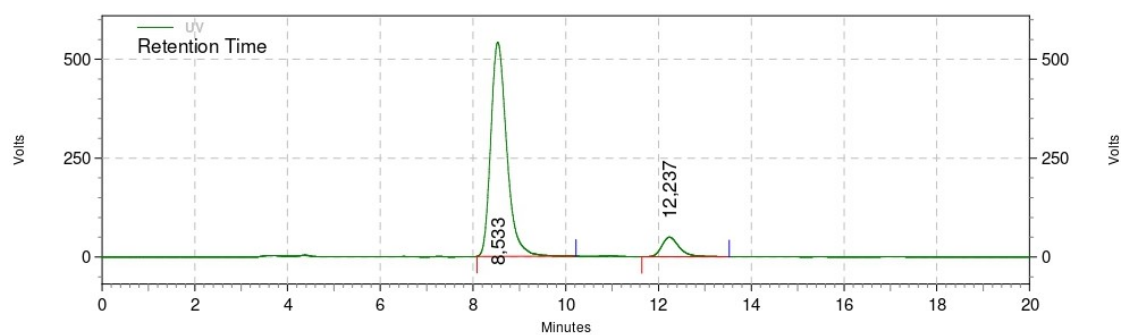

#### UV Results

| Retention Time | Area     | Area % | Height  | Height % |
|----------------|----------|--------|---------|----------|
| 8,533          | 51734767 | 90,85  | 2164605 | 91,61    |
| 12,237         | 5207490  | 9,15   | 198210  | 8,39     |

|        |          |        |         |        |
|--------|----------|--------|---------|--------|
| Totals | 56942257 | 100,00 | 2362815 | 100,00 |
|--------|----------|--------|---------|--------|



### Chiral HPLC chromatogram of racemic 7m

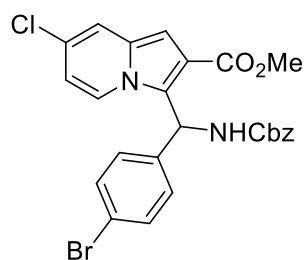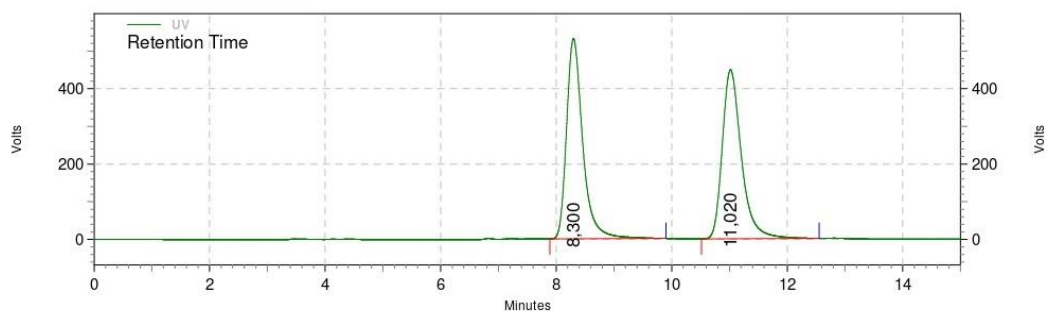

#### UV Results

| Retention Time | Area     | Area % | Height  | Height % |
|----------------|----------|--------|---------|----------|
| 8,300          | 41488099 | 50,15  | 2125774 | 54,22    |
| 11,020         | 41236167 | 49,85  | 1794511 | 45,78    |
| Totals         | 82724266 | 100,00 | 3920285 | 100,00   |

### Chiral HPLC chromatogram of chiral 7m

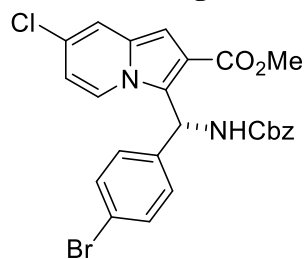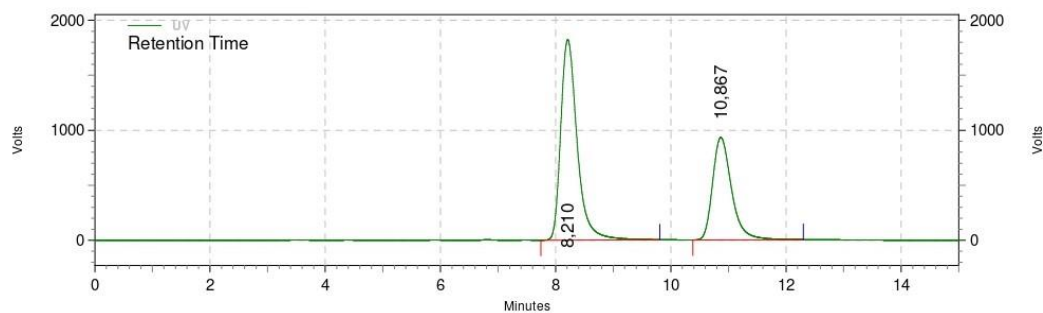

#### UV Results

| Retention Time | Area      | Area % | Height   | Height % |
|----------------|-----------|--------|----------|----------|
| 8,210          | 144359751 | 62,95  | 7291592  | 66,17    |
| 10,867         | 84962970  | 37,05  | 3728600  | 33,83    |
| Totals         | 229322721 | 100,00 | 11020192 | 100,00   |

### Chiral HPLC chromatogram of racemic 8

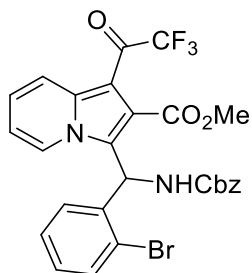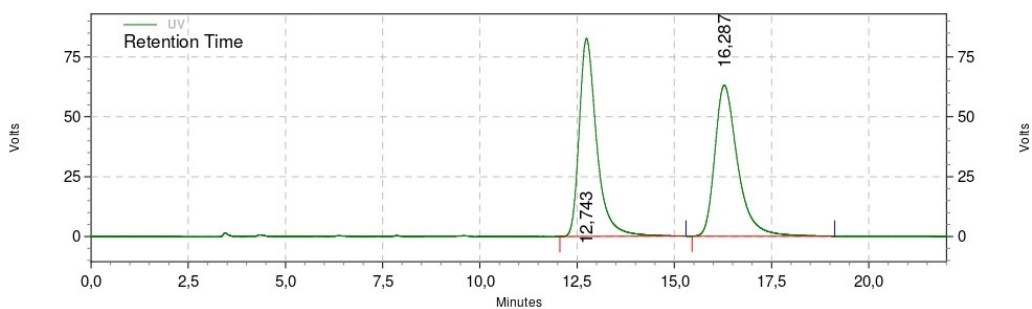

#### UV Results

| Retention Time | Area     | Area % | Height | Height % |
|----------------|----------|--------|--------|----------|
| 12,743         | 10371314 | 50,23  | 330848 | 56,73    |
| 16,287         | 10276489 | 49,77  | 252325 | 43,27    |

|        |          |        |        |        |
|--------|----------|--------|--------|--------|
| Totals | 20647803 | 100,00 | 583173 | 100,00 |
|--------|----------|--------|--------|--------|

### Chiral HPLC chromatogram of chiral 8

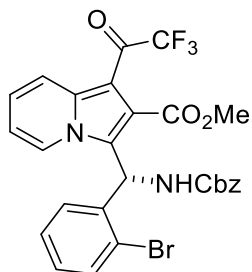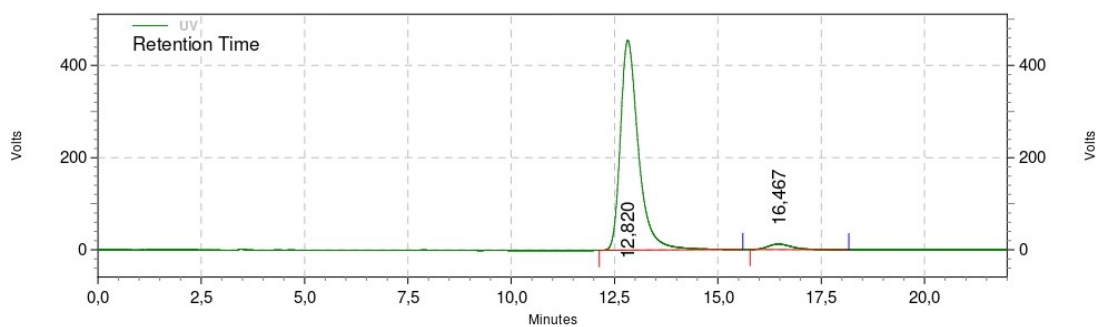

#### UV Results

| Retention Time | Area     | Area % | Height  | Height % |
|----------------|----------|--------|---------|----------|
| 12,820         | 55418881 | 96,61  | 1821714 | 97,43    |
| 16,467         | 1942638  | 3,39   | 47972   | 2,57     |

|        |          |        |         |        |
|--------|----------|--------|---------|--------|
| Totals | 57361519 | 100,00 | 1869686 | 100,00 |
|--------|----------|--------|---------|--------|

### Chiral HPLC chromatogram of racemic 9

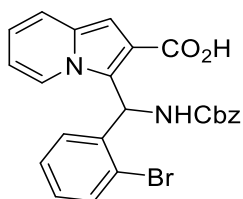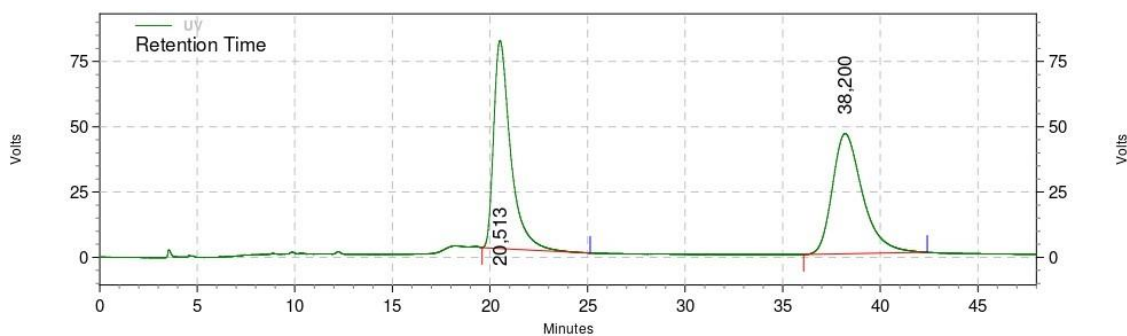

#### UV Results

| Retention Time | Area     | Area % | Height | Height % |
|----------------|----------|--------|--------|----------|
| 20,513         | 19278788 | 49,35  | 318383 | 63,35    |
| 38,200         | 19788952 | 50,65  | 184203 | 36,65    |

|        |          |        |        |        |
|--------|----------|--------|--------|--------|
| Totals | 39067740 | 100,00 | 502586 | 100,00 |
|--------|----------|--------|--------|--------|

### Chiral HPLC chromatogram of chiral 9

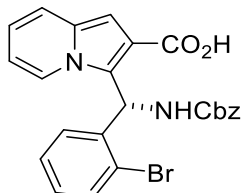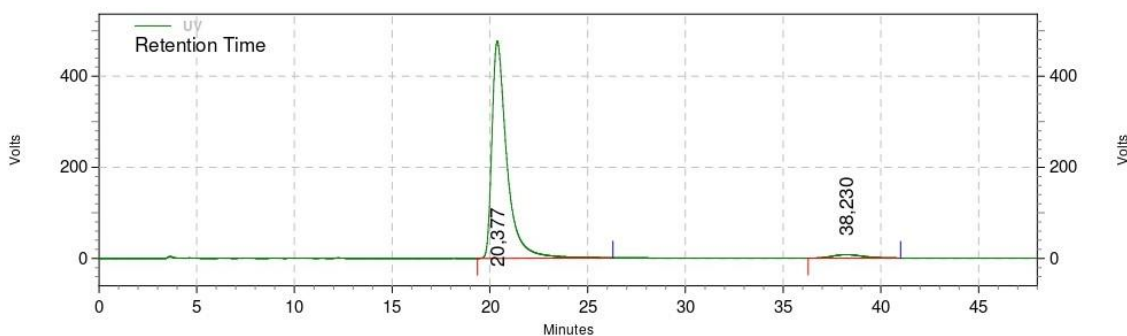

#### UV Results

| Retention Time | Area      | Area % | Height  | Height % |
|----------------|-----------|--------|---------|----------|
| 20,377         | 101138266 | 96,76  | 1907348 | 98,40    |
| 38,230         | 3385743   | 3,24   | 30985   | 1,60     |

|        |           |        |         |        |
|--------|-----------|--------|---------|--------|
| Totals | 104524009 | 100,00 | 1938333 | 100,00 |
|--------|-----------|--------|---------|--------|

## 9. Absolute configuration assignment for compounds 3a, 4a, 6a, 7a using circular dichroism

The conformational search was performed using CREST conformational searching tool within energy threshold of 6 kcal/mol.<sup>15</sup> The obtained conformers were then initially preselected using isostat conformer selection tool from molclus package<sup>16</sup> with energy threshold of 0.25 kcal/mol and cutoff of 0.5Å. The geometry of selected conformers was optimized using Gaussian 16<sup>17</sup> using density functional theory (DFT) using B3LYP functional with D3 (Becke–Johnson) dispersion correction “empiricaldispersion=gd3bj” along with def2SVP basis set with inclusion of CPCM solvation model via the keyword “scrf=(cpcm, solvent = acetonitrile)”. The local minima were confirmed by frequency calculations. The TD-DFT calculations were performed for the first twenty lowest excitation energies on previously obtained geometries using  $\omega$ B97XD functional with def2TZVP basis set and included solvent effects in acetonitrile via CPCM solvation model. The computed CD spectra were obtained employing Boltzmann averaging using SpecDis software<sup>18</sup> and compared with experimental results. In all cases the *R* configuration was assigned.

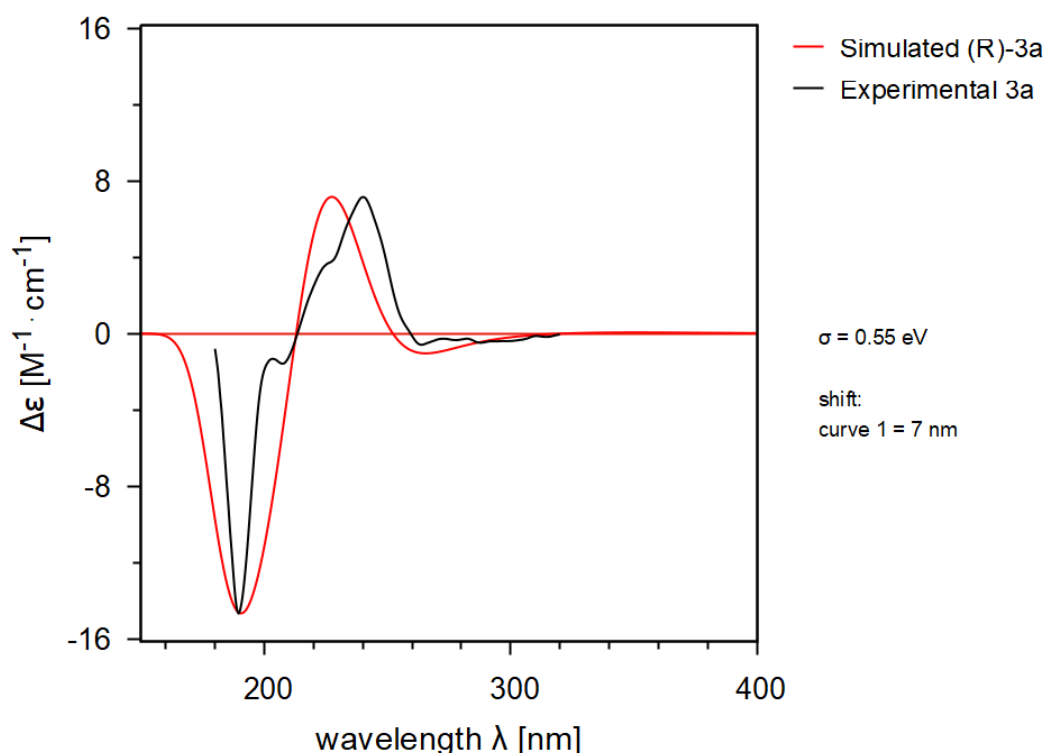

**Figure S1.** Comparison of experimental and simulated electronic dichroism spectra for compound 3a.

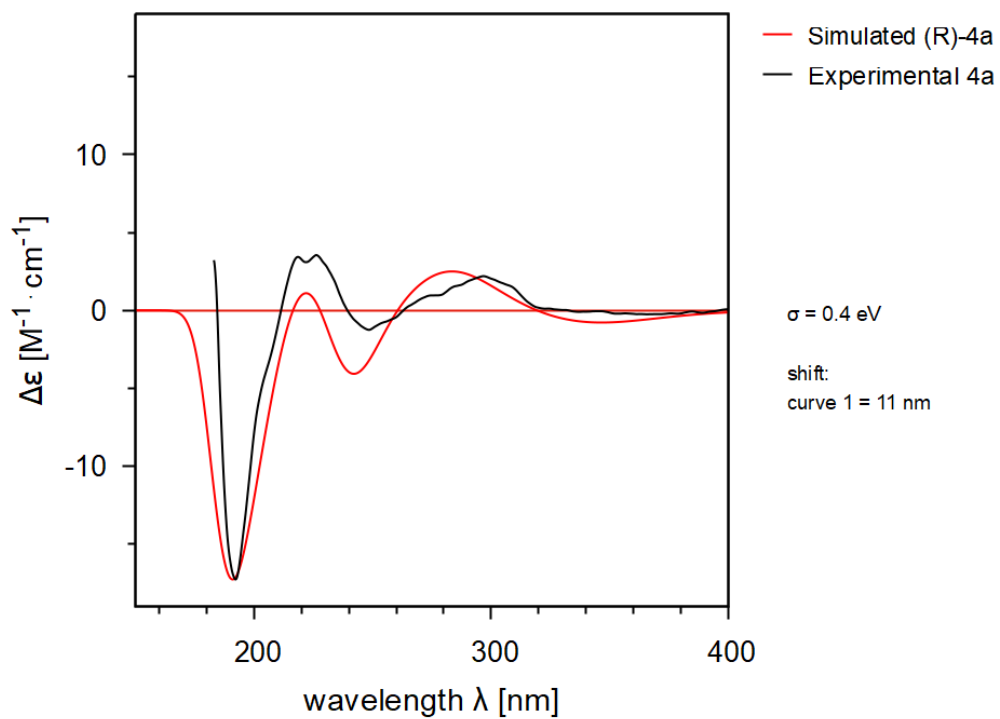

**Figure S2.** Comparison of experimental electronic dichroism spectra and simulated for compound **4a**.

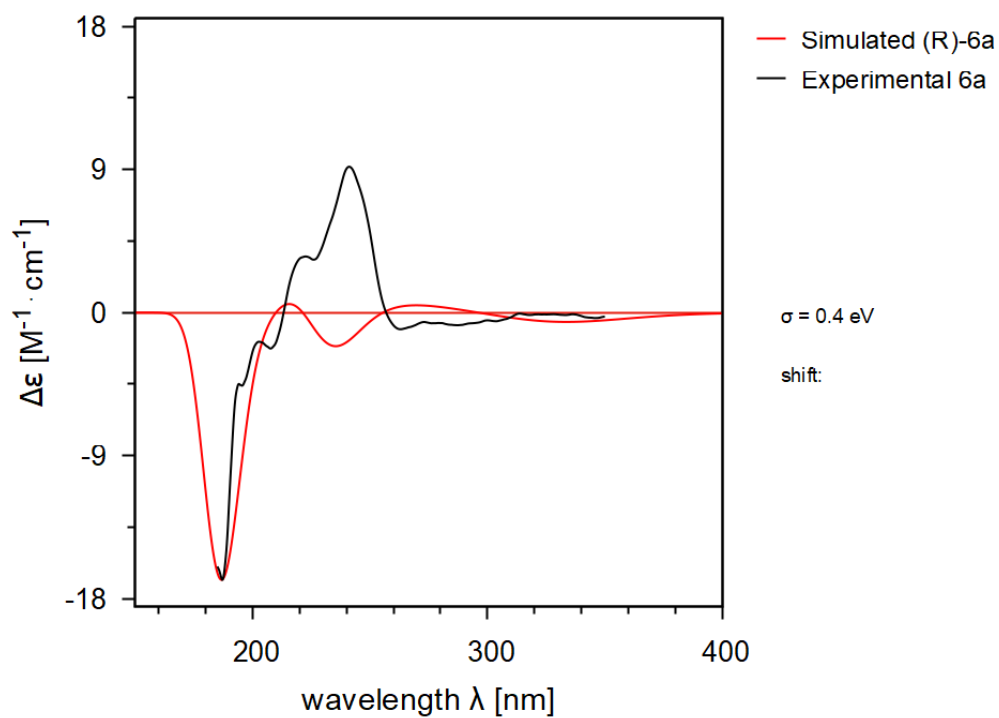

**Figure S3.** Comparison of experimental electronic dichroism spectra and simulated for compound **6a**.

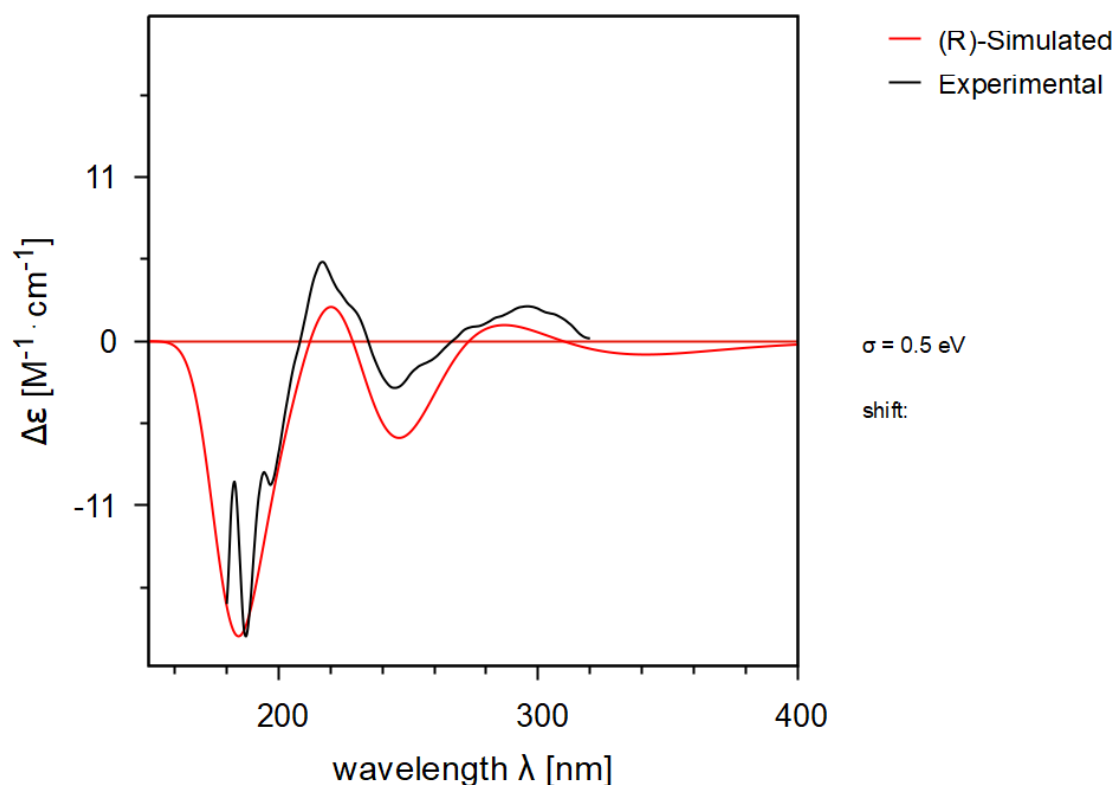

**Figure S4.** Comparison of experimental electronic dichroism spectra and simulated for compound **7a**.

**Table S18.** Energies and Gibbs free energies (in Hartrees) calculated for conformers of (*R*)-**3a** calculated at B3LYP-D3(BJ)/def2svp/CPCM (acetonitrile) and their Boltzmann distribution factors.

| Structure ( <i>R</i> )- <b>3a</b><br>Conformer | E <sub>(solv-B3LYP-D3(BJ))</sub> | G <sub>(solv-B3LYP-D3(BJ))</sub> | Boltzmann distribution (%) |
|------------------------------------------------|----------------------------------|----------------------------------|----------------------------|
| 1                                              | -1262.454627                     | -1262.089741                     | 78.01                      |
| 2                                              | -1262.453795                     | -1262.087623                     | 8.26                       |
| 3                                              | -1262.45478                      | -1262.087325                     | 6.03                       |
| 4                                              | -1262.451997                     | -1262.087128                     | 4.89                       |
| 5                                              | -1262.451535                     | -1262.085613                     | 0.98                       |

**Table S19.** Energies and Gibbs free energies (in Hartrees) calculated for conformers of (*R*)-**4a** calculated at B3LYP-D3(BJ)/def2svp/CPCM (acetonitrile) and their Boltzmann distribution factors.

| Structure ( <i>R</i> )- <b>4a</b><br>Conformer | E <sub>(solv-B3LYP-D3(BJ))</sub> | G <sub>(solv-B3LYP-D3(BJ))</sub> | Boltzmann distribution (%) |
|------------------------------------------------|----------------------------------|----------------------------------|----------------------------|
| 1                                              | -1262,453670                     | -1262,087924                     | 51.17                      |
| 2                                              | -1262,452843                     | -1262,086832                     | 16.09                      |
| 3                                              | -1262,452905                     | -1262,086761                     | 14.93                      |
| 4                                              | -1262,450919                     | -1262,085839                     | 5.62                       |
| 5                                              | -1262,452702                     | -1262,085812                     | 5.46                       |
| 6                                              | -1262,450758                     | -1262,085419                     | 3.60                       |
| 7                                              | -1262,450385                     | -1262,084329                     | 1.13                       |

**Table S20.** Energies and Gibbs free energies (in Hartrees) calculated for conformers of (*R*)-**6a** calculated at B3LYP-D3(BJ)/def2svp/CPCM (acetonitrile) and their Boltzmann distribution factors.

| Structure ( <i>R</i> )- <b>6a</b><br>Conformer | E <sub>(solv-B3LYP-D3(BJ))</sub> | G <sub>(solv-B3LYP-D3(BJ))</sub> | Boltzmann distribution (%) |
|------------------------------------------------|----------------------------------|----------------------------------|----------------------------|
| 1                                              | -1375.492701                     | -1375.128097                     | 16.94                      |
| 2                                              | -1375.493002                     | -1375.127939                     | 14.33                      |
| 3                                              | -1375.493139                     | -1375.127769                     | 11.97                      |
| 4                                              | -1375.493877                     | -1375.127594                     | 9.94                       |
| 5                                              | -1375.49195                      | -1375.126603                     | 3.48                       |
| 6                                              | -1375.491949                     | -1375.126594                     | 3.44                       |
| 7                                              | -1375.489697                     | -1375.126508                     | 3.14                       |
| 8                                              | -1375.491433                     | -1375.126499                     | 3.11                       |
| 9                                              | -1375.490292                     | -1375.12646                      | 2.99                       |
| 10                                             | -1375.491435                     | -1375.126401                     | 2.81                       |
| 11                                             | -1375.491723                     | -1375.126298                     | 2.52                       |
| 12                                             | -1375.492248                     | -1375.126192                     | 2.25                       |
| 13                                             | -1375.489406                     | -1375.126186                     | 2.23                       |
| 14                                             | -1375.492247                     | -1375.126185                     | 2.23                       |
| 15                                             | -1375.489947                     | -1375.126                        | 1.83                       |
| 16                                             | -1375.487644                     | -1375.125928                     | 1.70                       |
| 17                                             | -1375.491418                     | -1375.125575                     | 1.17                       |
| 18                                             | -1375.489975                     | -1375.125514                     | 1.09                       |
| 19                                             | -1375.49201                      | -1375.125484                     | 1.06                       |
| 20                                             | -1375.489954                     | -1375.125433                     | 1.00                       |

**Table S21.** Energies and Gibbs free energies (in Hartrees) calculated for conformers of (*R*)-**7a** calculated at B3LYP-D3(BJ)/def2svp/CPCM (acetonitrile) and their Boltzmann distribution factors.

| Structure ( <i>R</i> )- <b>7a</b><br>Conformer | E <sub>(solv-B3LYP-D3(BJ))</sub> | G <sub>(solv-B3LYP-D3(BJ))</sub> | Boltzmann distribution (%) |
|------------------------------------------------|----------------------------------|----------------------------------|----------------------------|
| 1                                              | -1375.491575                     | -1375.127142                     | 12.88                      |
| 2                                              | -1375.492108                     | -1375.126995                     | 11.02                      |
| 3                                              | -1375.492587                     | -1375.126994                     | 11.01                      |
| 4                                              | -1375.491204                     | -1375.126935                     | 10.34                      |
| 5                                              | -1375.490972                     | -1375.126885                     | 9.81                       |
| 6                                              | -1375.487185                     | -1375.125822                     | 3.18                       |
| 7                                              | -1375.488481                     | -1375.125761                     | 2.98                       |
| 8                                              | -1375.490649                     | -1375.12576                      | 2.98                       |
| 9                                              | -1375.490601                     | -1375.125751                     | 2.95                       |
| 10                                             | -1375.490855                     | -1375.125599                     | 2.51                       |
| 11                                             | -1375.490706                     | -1375.125554                     | 2.39                       |
| 12                                             | -1375.490111                     | -1375.125524                     | 2.32                       |
| 13                                             | -1375.488619                     | -1375.125519                     | 2.30                       |
| 14                                             | -1375.490766                     | -1375.12539                      | 2.01                       |
| 15                                             | -1375.488803                     | -1375.125373                     | 1.97                       |
| 16                                             | -1375.48739                      | -1375.125328                     | 1.88                       |
| 17                                             | -1375.487163                     | -1375.125059                     | 1.41                       |
| 18                                             | -1375.489332                     | -1375.124995                     | 1.32                       |
| 19                                             | -1375.488003                     | -1375.124855                     | 1.14                       |
| 20                                             | -1375.490948                     | -1375.124817                     | 1.10                       |
| 21                                             | -1375.486469                     | -1375.124733                     | 1.00                       |

## 10. Computational investigation of indolizine alkylation selectivity

Conformational search was performed using CREST to find the structure of the lowest energy conformer of each catalyst.<sup>15</sup> All descriptors mentioned below were computed with MORFEUS Python package.<sup>19</sup> The data collected during catalyst screening from Table S1 and Table S12 were combined, giving data for 30 catalyst for *N*-Boc aminals and similarly data for 27 catalyst for *N*-Cbz aminals. The CPA catalyst **A11** with pyramidal (sp<sup>3</sup>-hybridized) triphenylsilyl substituent at the 3,3' positions was removed from the dataset as well as CPA catalyst **E** with completely different VAPOL backbone.

We found the optimal parameters for % buried volume descriptor (%  $V_{\text{bur}}$ ) by varying the center of sphere and its radius. All buried volumes were computed without hydrogens. As a criteria for parameters optimization we used Pearson correlation coefficient (PCC) between difference of free energies of two regioisomers and catalyst %buried volume. The results are given in the Table S22.

**Table S22.** Pearson correlation coefficient for different location of % buried volume descriptor.

| Center | Best radius, Å | PCC   |
|--------|----------------|-------|
| P      | 4.5            | -0.77 |
| O1     | 5.5            | -0.76 |
| O2     | 4.5            | -0.79 |

To elucidate the effect of aminal substituents on the regioselectivity, the dataset was split into two groups: reaction with *N*-Boc aminals (28 reactions) and with *N*-Cbz aminal (27 reactions). Figure S5 and Table S23 is showing similar relationship between observed C3/C1 selectivity for both *N*-Boc aminals and *N*-Cbz aminals and %  $V_{\text{bur}}$  although the reactions for these two groups were performed in two different solvents, toluene and dichloromethane, respectively. Combining the substituents effect of catalyst and aminals we can conclude, that bigger free volume in catalyst pocket facilitate formation of C1-product. However, when active center is crowded the preferable is C3-product.

The effect of other catalyst properties on the regioselectivity were also tested. Computed SASA (solvent accessibility surface area) descriptor placed at the oxygen of CPA and similarly dispersion descriptor placed at oxygen of catalyst also showed also good correlation with regioselectivity (PCC was 0.78). While, the Sterimol and Octants descriptors gave a low correlation with observed selectivity.



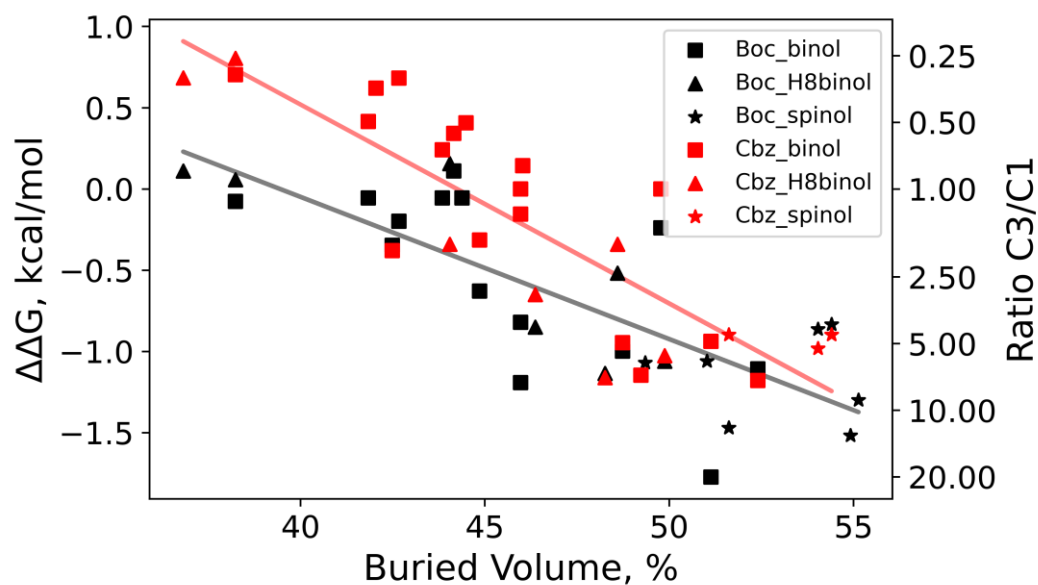

**Figure S5.** Plot showing correlations of C3/C1 selectivity ( $\Delta\Delta G$ ) for *N*-Boc amins (black) and *N*-cbz amins (red) and  $\%V_{\text{bur}}$  of the catalyst for model reactions with distinction of different CPA catalyst subgroups.

**Table S23.** Comparison of Pearson correlation coefficients for *N*-Boc and *N*-Cbz amins.

| Aminal Protecting Group | PCC(Pearson coefficient) | slope   | intercept |
|-------------------------|--------------------------|---------|-----------|
| Boc                     | -0.79                    | -0.0875 | 3.451     |
| Cbz                     | -0.85                    | -0.1224 | 5.4155    |

## 11. References

1. X. L. Liu, Z. B. Yu, B. W. Pan, L. Chen, T. T. Feng and Y. Zhou, Synthesis of Novel Chiral Phosphoric Acid-Bearing Two Acidic Phenolic Hydroxyl Groups and its Catalytic Evaluation for Enantioselective Friedel-Crafts Alkylation of Indoles and Enones, *J. Heterocycl. Chem.*, 2015, **52**, 628-634.
2. M. Hatano, T. Ikeno, T. Matsumura, S. Torii and K. Ishihara, Chiral lithium salts of phosphoric acids as lewis acid-base conjugate catalysts for the enantioselective cyanosilylation of ketones, *Adv. Synth. Catal.*, 2008, **350**, 1776-1780.
3. Y. Konda, A. R. Ankireddy, V. M. Velavalapalli, K. Paidikondala, A. Pasula and R. Gundla, Synthesis, Alpha-Glucosidase Inhibition and Antibacterial Activities of the New Chiral (R)-3,3'-Disubstituted BINOL-Phosphates, *Russ. J. Gen. Chem.*, 2022, **92**, 898-907.
4. T. Kano, T. Yurino, D. Asakawa and K. Maruoka, Acid-Catalyzed In Situ Generation of Less Accessible or Unprecedented N-Boc Imines from N-Boc Amins, *Angew. Chem. Int. Ed.*, 2013, **52**, 5532-5534.
5. S. Brenet, C. Minozzi, B. Clarens, L. Amiri and F. Berthiol, 3,3'-Diiodobinaphthol and 3,3'-Diiodobiphenol Derivatives as Hypervalent Iodine Organocatalysts for the  $\alpha$ -Oxytosylation of Ketones, *Synthesis*, 2015, **47**, 3859-3873.
6. M. Bartoszek, M. Beller, J. Deutsch, M. Klawonn, A. Köckritz, N. Nemati and A. Pews-Davtyan, A convenient protocol for the synthesis of axially chiral Bronsted acids, *Tetrahedron*, 2008, **64**, 1316-1322.
7. W. Kashikura, J. Itoh, K. Mori and T. Akiyama, Enantioselective Friedel-Crafts Alkylation of Indoles, Pyrroles, and Furans with Trifluoropyruvate Catalyzed by Chiral Phosphoric Acid, *Chem. Asian J.*, 2010, **5**, 470-472.
8. J. H. Tay, A. J. Arguelles and P. Nagorny, Direct Interconversion of BINOL and H8-BINOL-Based Chiral Bronsted Acids Using Single-Step Red/Ox Manipulations, *Org. Lett.*, 2015, **17**, 3774-3777.
9. R. Hrdina, L. Guénée, D. Moraleda and J. Lacour, Synthesis, Structural Analysis, and Catalytic Properties of Tetrakis(binaphthyl or octahydrobinaphthyl phosphate) Dirhodium (II,II) Complexes, *Organometallics*, 2013, **32**, 473-479.
10. S. Müller, M. J. Webber and B. List, The Catalytic Asymmetric Fischer Indolization, *J. Am. Chem. Soc.*, 2011, **133**, 18534-18537.
11. L. Kötzner, M. J. Webber, A. Martínez, C. De Fusco and B. List, Asymmetric Catalysis on the Nanoscale: The Organocatalytic Approach to Helicenes, *Angew. Chem. Int. Ed.*, 2014, **53**, 5202-5205.
12. C. H. Xing, Y. X. Liao, J. Ng and Q. S. Hu, Optically Active 1,1'-Spirobiindane-7,7'-diol (SPINOL)-Based Phosphoric Acids as Highly Enantioselective Catalysts for Asymmetric Organocatalysis, *J. Org. Chem.*, 2011, **76**, 4125-4131.
13. C. H. Xing, Y. X. Liao, Y. M. Zhang, D. Sabarova, M. Bassous and Q. S. Hu, Asymmetric Allylboration of Aldehydes with Pinacol Allylboronates Catalyzed by 1,1'-Spirobiindane-7,7'-diol (SPINOL) Based Phosphoric Acids, *E. J. Org. Chem.*, 2012, **2012**, 1115-1118.
14. D. B. Granger, Y. Mei, K. J. Thorley, S. R. Parkin, O. D. Jurchescu and J. E. Anthony, Synthesis and Electrical Properties of Derivatives of 1,4-bis(trialkylsilyl)ethynylbenzo[2,3-b:5,6-b']diindolizines, *Org. Lett.*, 2016, **18**, 6050-6053.
15. P. Pracht, S. Grimme, C. Bannwarth, F. Bohle, S. Ehlert, G. Feldmann, J. Gorges, M. Müller, T. Neudecker, C. Plett, S. Spicher, P. Steinbach, P. A. Wesolowski and F. Zeller, CREST-A program for the exploration of low-energy molecular chemical space, *J. Chem. Phys.*, 2024, **160**, 28.
16. v. T. Lu Molclus Program, <http://www.keinsci.com/research/molclus.html> (accessed on 16 January, 2024).

17. M. J. Frisch, G. W. Trucks, H. B. Schlegel, G. E. Scuseria, M. A. Robb, J. R. Cheeseman, G. Scalmani, V. Barone, G. A. Petersson, H. Nakatsuji, et al. Gaussian 16, Revision A.03; Gaussian, Inc.: Wallingford, CT, USA, 2016.
18. T. Bruhn, A. Schaumlöffel, Y. Hemberger and G. Bringmann, SpecDis: Quantifying the Comparison of Calculated and Experimental Electronic Circular Dichroism Spectra, *Chirality*, 2013, **25**, 243-249.
19. Morfeus: Molecular features for machine learning. <https://digital-chemistry-laboratory.github.io/morfeus/>, accessed on 01 June 2024.
